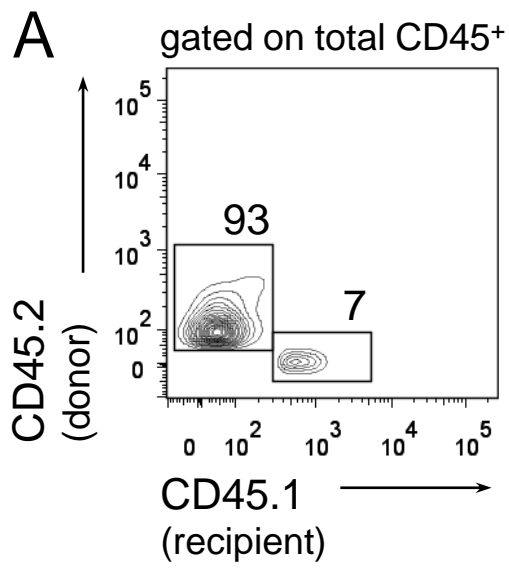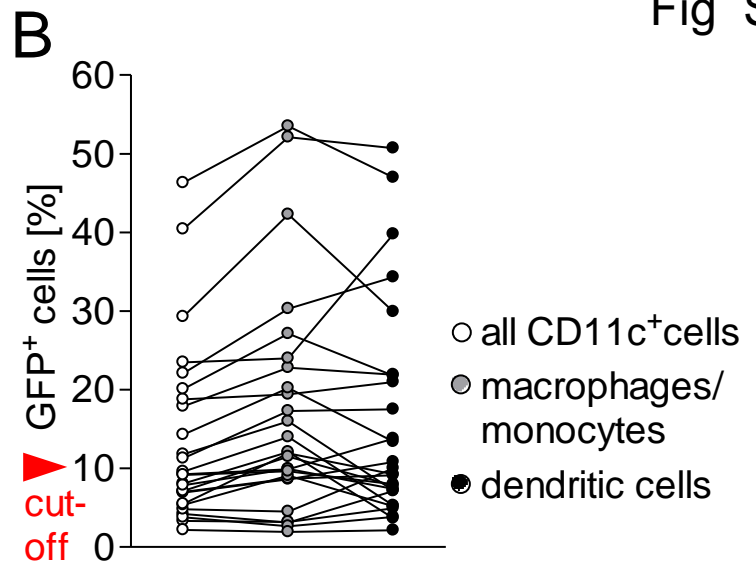

Source: https://geomar-search.kobv.de/redirect.do?ind=11&index=crossrefExt&plv=2&target=crossref_info%3Adoi%2F10.1371%252Fjournal.ppat.1005408
