# Supplementary material for: IFNs Modify the Proteome of Legionella-Containing Vacuoles and Restrict Infection Via IRG1-Derived Itaconic Acid
Source: PLoS Pathog. 2016 Feb 1;12(2):e1005408. doi: 10.1371/journal.ppat.1005408 (PMC4734697; doi:10.1371/journal.ppat.1005408)
Supplement: S1 Dataset — Tabular outline of all genes significantly up- or down-regulated in WT mice upon L. pneumophila infection and their regulation in Ifnar -/-, Ifngr -/- and Ifnar/Ifngr -/- mice upon infection. (XLSX) [file ppat.1005408.s010.xlsx]

## Sheet: all mouse strains - PBS vs Lp
Up-regulated genes (red) were used for upstream regulator analysis (Fig 1B) and generation of the heat map (Fig 1C).
		WT + PBS vs. WT + Lp		Ifnar-/- + PBS vs. Ifnar -/- + Lp		Ifngr-/- + PBS vs. Ifngr -/- + Lp		Ifnar/Ifngr-/- + PBS vs. Ifnar/Ifngr -/- + Lp
name	accession #	fold change	p-value	fold change (Ifnar)	p-value (Ifnar)	fold change (Ifngr)	p-value (Ifngr)	fold change (Ifnar/Ifngr)	p-value (Ifnar/Ifngr)
Cxcl10	NM_021274	135.521	0	83.058	0	52.6264	0	6.13357	0
Il22	NM_016971	82.436	0	29.6533	1.0018e-14	75.9935	1.44627e-34	66.4482	0
Slfn4	NM_011410	48.9334	0	23.7122	1.06168e-38	17.0934	0	5.7854	0
Il6	NM_031168	41.1233	0	25.8282	0	30.7203	0	20.8469	0
Cxcl5	NM_009141	36.8456	3.94829e-27	33.8772	0	35.9497	3.90322e-30	37.0833	0
Cxcl11	NM_019494	30.9767	0	31.9738	1.05798e-42	32.896	0	1	1
Prm1	NM_013637	30.8366	3.6714e-43	7.6838	0	1.61449	0.00019	1.39863	0.01891
A_52_P480044		29.2941	0	33.3644	0	3.08401	2.25502e-07	1.56862	0.44221
Ifnb1	NM_010510	28.3092	0	9.18721	2.32914e-17	7.99971	1.40194e-24	4.96526	1.12199e-12
Cxcl2	NM_009140	26.4139	0	19.8327	0	18.8152	0	20.1436	0
LOC240327	AK041062	26.3965	0	33.5247	0	5.57172	0.00882	1	1
Saa1	NM_009117	26.2118	2.77329e-32	22.1528	0	11.3027	2.58243e-34	10.9529	1.82169e-43
Irg1	AK036446	25.8975	0	22.3096	0	16.7175	0	13.2081	0
Iigp1	NM_021792	25.764	0	39.3499	0	3.17642	0	2.13122	1.69628e-09
Gm1960	NM_203320	23.2064	0	27.3527	0	22.193	0	24.2944	0
TC1414063		22.5452	0	13.8915	0	28.3743	0	20.108	0
Prok2	NM_015768	21.7585	2.41754e-35	10.262	1.42664e-34	26.525	4.8042e-36	3.47724	8.85225e-30
Rp23-14f5.7	BC022776	21.5183	0	21.7148	0	-1.18715	0.57223	1.52151	0.43044
Ccl4	NM_013652	21.3417	0	15.8465	0	17.0232	0	17.0913	0
Igtp	NM_018738	20.427	4.38326e-42	26.2887	0	2.6008	9.46219e-30	1.61081	5.06702e-09
A630077B13Rik	NM_175449	19.9743	3.99622e-41	19.346	0	2.79543	8.38566e-35	2.10418	1.3777e-29
Indo	NM_008324	19.3405	7.00001e-29	21.4733	0	1.07299	0.45149	-1.07158	0.50571
Mx1	NM_010846	19.1885	0	4.43594	0	6.73622	0	1.26715	0.00293
Ccl7	NM_013654	18.8989	0	13.9311	0	13.2285	0	11.3161	0
Gbp5	NM_153564	18.8662	0	20.6515	9.89388e-40	1.98839	2e-05	1.19971	0.27345
BC020489	AK050122	17.4641	0	20.7838	0	5.98806	0	2.28469	1.99752e-24
Rsad2	NM_021384	17.2714	0	9.31465	0	6.83262	5.07491e-26	-1.03203	0.91837
Cxcl1	NM_008176	17.1607	0	19.15	0	26.6973	0	26.9527	0
Ifng	NM_008337	16.717	0	15.4851	0	14.861	0	9.15954	0
Cngb3	NM_013927	16.5967	1.15998e-35	1	1	1.51248	0.22138	1	1
NAP017963-001		16.2815	0	15.1958	1.43182e-34	5.1509	1.46619e-14	1	1
1700016F12Rik	AK006025	16.148	0	18.4685	0	1.99898	0.3116	1.5261	0.53997
Chl1	NM_007697	15.8584	0	13.3234	0	11.26	3.54138e-24	10.2912	0
Ccl20	NM_016960	15.4137	0	12.9385	0	11.4192	0	14.8175	0
Cxcl9	NM_008599	15.3303	3.1234e-36	14.8398	0	7.75544	0	2.11679	7.25372e-06
Mpa2l	NM_194336	15.2893	5.30693e-39	23.8105	0	2.98724	0	2.62811	0
Ifit1	NM_008331	15.1318	0	10.9021	0	5.15347	0	1.71836	5.15662e-15
BC023105	NM_145357	15.0074	3.44896e-19	23.6991	0	2.4227	0.00035	1.07362	0.9081
Ccl12	NM_011331	14.93	0	7.11231	3.51257e-36	6.80077	6.64215e-43	5.08144	7.31486e-28
Slfn3	NM_011409	14.5421	0	5.60549	3.51326e-26	8.07012	0	3.68867	5.19259e-13
Retnlb	NM_023881	13.9303	0	11.0198	0	9.18357	9.98181e-25	5.46281	0
Slc7a11	NM_011990	13.929	3.7993e-35	7.32352	5.10627e-23	6.85169	5.10744e-31	8.76574	1.95947e-17
Serpina3g	AY862185	13.6434	0	11.6427	0	4.0251	0	4.29128	1.19723e-40
Msr1	NM_031195	13.5055	0	7.96797	5.70754e-33	6.13425	0	5.8809	0
Serpina3f	BC049975	13.396	0	12.4353	0	4.04834	0	4.84423	3.94858e-34
Saa4	NM_011316	13.2203	1.17194e-28	13.0105	0	11.1274	2.01546e-26	8.50803	0
Tnfsf4	NM_009452	13.2179	0	7.17709	7.64434e-18	5.62391	4.64527e-10	7.0975	1.75369e-36
Aoah	AK033474	13.1836	0	10.7699	1.90311e-11	3.68401	7.47601e-19	4.45962	1.4068e-23
Ifit2	NM_008332	13.1781	0	3.3604	0	2.17686	4.73488e-24	-1.52774	0.00072
Oas1g	NM_011852	12.8891	8.2077e-38	1.4248	0.59551	4.36618	0.0085	1	1
Gbp4	NM_018734	12.6256	0	18.1054	0	1.77058	1.30333e-10	1.07636	0.42412
5830443L24Rik	NM_029509	12.2472	0	9.92703	0	1.04541	0.41796	-1.00024	0.99725
1700006H03Rik	AK005675	12.1813	1.6573e-40	6.95343	3.2076e-12	7.7335	3.83368e-06	4.84052	6.39309e-08
Serpina10	NM_144834	12.177	9.27497e-31	13.3688	1.28454e-34	2.38796	2.90464e-07	3.01784	3e-05
Tgtp	NM_011579	12.025	0	13.0782	0	1.8743	2.15879e-09	1.35721	0.01127
Mefv	NM_019453	11.9163	0	8.58661	0	7.04089	0	5.83441	0
Gatm	NM_025961	11.7063	9.18932e-40	8.39853	0	4.08373	0	2.64993	2.71504e-37
Ifi44	NM_133871	11.5208	2.88956e-40	22.6688	0	3.11619	2.34994e-17	2.12639	2.61436e-24
Saa2	NM_011314	11.3182	6.17033e-35	10.0211	0	8.94234	8.48626e-42	8.45987	0
Gzmc	NM_010371	11.2137	7.39105e-26	6.9255	6.32737e-28	6.67995	2.40312e-13	3.83415	0
Ms4a6d	NM_026835	11.1533	0	6.38761	0	5.57302	5.44654e-25	4.0056	0
Sct	NM_011328	11.0825	0	1.52788	2.70718e-08	3.76889	0	1.3155	0.01586
Ccl8	NM_021443	11.0517	9.34174e-34	12.8342	0	6.43383	7.56894e-33	4.70109	0
ENSMUST00000031817		11.0416	0	5.65948	0	2.31058	1.12685e-20	1.25979	0.0029
TC1463498		11.0271	0	4.10216	0	2.69808	4.48773e-39	-1.05875	0.38432
Gbp1	NM_010259	10.8486	0	12.1848	0	1.03895	0.81233	1.04875	0.84435
Orm2	NM_011016	10.8453	0	9.85497	0	7.87147	7.3588e-33	6.11258	0
Gpr84	NM_030720	10.7974	3.09046e-31	12.0443	0	11.5114	1.54651e-30	10.5149	0
Irgm	NM_008326	10.6996	2.38452e-40	13.4713	0	2.01086	1.21824e-14	1.19073	0.0186
NAP030421-1		10.4428	2.05652e-24	6.59733	9.65961e-06	6.72473	4.67577e-33	5.10737	1.22114e-18
Ifi204	NM_008329	10.1595	1.09196e-35	3.8295	1.87675e-39	2.59818	0	1.05579	0.55508
Plac8	NM_139198	10.117	1.49988e-35	6.29794	0	2.71588	3.85496e-38	2.285	7.89962e-15
Chrna7	NM_007390	10.0222	0	4.00024	1.90864e-08	9.08837	0	3.95974	9.88226e-13
Cxcl13	NM_018866	9.56254	6.6205e-38	4.02339	1.9674e-35	9.19006	1.4013e-44	5.51906	0
Dtl	NM_029766	9.46374	3.62901e-33	6.34732	2.49916e-12	5.44069	5.05166e-20	3.14846	5.26039e-21
Ccl2	NM_011333	9.34237	0	8.17251	0	6.78774	0	6.23968	0
4833422F24Rik	NM_029021	9.14467	0	7.78702	0	5.99086	0	4.39845	0
AI607873	XM_129595	9.11592	0	4.21854	0	4.01655	3.69803e-42	1.12155	0.37243
Chit1	NM_027979	9.10554	0	4.65628	3.41251e-28	2.85961	5.20125e-11	-1.04411	0.75696
Gpr141	NM_181754	9.08642	0	5.8193	0	1.71949	1.81831e-06	-1.05159	0.48392
TC1449385		9.07426	4.8187e-19	6.25248	0	7.16248	4.9335e-32	3.54186	6.87651e-19
Ifi205	NM_172648	9.06351	1.60347e-37	3.45986	0	1.72562	1.99428e-18	1.44778	9.42674e-07
Herc5	AK037442	9.02206	2.62481e-17	5.3409	2.09193e-16	2.0033	0.005	1.56487	0.38001
Irf7	NM_016850	9.00349	4.09179e-43	6.02968	0	3.28306	1.38089e-25	1.68166	8e-05
Clec12a	NM_177686	8.9865	0	7.04453	1.07027e-24	2.48122	2.50722e-19	2.12659	0.00012
Stat1	AK041814	8.79651	0	12.9754	0	2.0771	7.93412e-16	1.26078	0.00046
Saa3	NM_011315	8.73165	1.24208e-11	9.12521	6.77009e-22	6.45451	3.45745e-16	7.51191	5.74114e-26
Il17a	NM_010552	8.6453	1.94462e-27	6.29004	7.14275e-13	9.65625	1.40219e-08	12.7877	1.89372e-15
Oas1f	NM_145153	8.63818	0	5.59904	0	3.60098	0	1.79649	1.16604e-25
NP064182		8.59166	2.12069e-19	7.13799	0	6.152	4.45099e-33	6.17401	5.17026e-27
AK046563	AK046563	8.58265	1.27652e-09	9.57769	0	7.8963	1.61342e-22	9.79429	1.4013e-45
Il12rb1	NM_008353	8.56582	0	6.07309	0	2.49093	1.73336e-19	2.3662	1.52863e-24
4922502D21Rik	NM_199034	8.50119	1.47345e-26	11.1515	3.73907e-26	4.60525	7.39993e-11	3.00802	0.00161
Timp1	NM_011593	8.4871	9.96578e-28	7.34025	0	7.43129	5.04173e-40	6.71235	2.20973e-35
Lair1	NM_178611	8.48205	0	5.65463	0	2.05046	1.8507e-18	2.12246	2.76819e-34
Fcgr1	BC025535	8.47761	2.26841e-26	6.32634	0	4.98934	5.68127e-25	2.37733	0
Mmp25	BC059059	8.47348	0	4.75583	0	3.83277	1.0084e-18	3.37122	5.35599e-13
Orm1	NM_008768	8.41875	2.53142e-31	8.50355	0	9.93365	1.30894e-33	6.46584	0
Phf11	NM_172603	8.37062	0	4.06277	0	2.14938	4.74304e-27	1.27723	0.0218
Apol6	AK010208	8.3177	0	9.08808	0	1.42723	0.00019	-1.37077	0.00064
Clec4d	NM_010819	8.31002	0	5.99506	0	5.58253	0	3.93193	0
Mx2	NM_013606	8.30225	0	5.36686	0	3.58114	0	1.18554	0.02503
Oas2	NM_145227	8.25206	0	15.7059	0	4.18031	4.94665e-40	4.32853	9.85468e-07
Oasl2	NM_011854	8.23132	1.74067e-39	8.93611	0	2.77143	6.39073e-28	1.42173	3e-05
Sectm1	NM_026907	8.22572	0	5.53573	0	3.53409	8.18445e-16	2.5511	0
Socs1	NM_009896	8.17372	0	6.90522	0	1.96247	1.07021e-27	1.52509	0.00056
Ubd	NM_023137	8.15729	9.09148e-18	8.66749	1.83513e-31	2.32334	1.75881e-11	1.31793	0.07199
Il1b	NM_008361	8.12561	0	6.74405	0	6.71261	0	4.63924	0
Aif1	NM_019467	8.09457	0	6.55879	0	2.7569	2.32025e-37	2.74846	6.21855e-27
Trem1	NM_021406	8.09454	0	5.03031	0	6.18347	0	4.54355	0
Ms4a6b	NM_027209	8.07521	0	3.19129	0	1.98955	1.29414e-27	1.63019	3.07463e-17
Isg15	NM_015783	8.05163	2.11547e-25	7.5587	0	4.49448	2.8026e-45	1.90549	2.30206e-26
BC028450	NM_173790	8.04558	0	5.34468	0	5.16755	0	3.33386	0
Ppil5	NM_027178	8.00199	0	6.79293	0	6.94803	0	5.10542	3.11631e-35
Klra2	NM_008462	7.99804	0	5.16944	0	1.48427	8e-05	1.4453	1.05206e-09
Lhx2	NM_010710	7.94384	2.04425e-19	2.69519	2.07228e-19	4.41329	5.84259e-25	3.12046	0.00041
Il1rn	NM_031167	7.93688	0	6.8376	4.2039e-45	4.90259	2.70235e-21	4.41268	0
Il1r2	NM_010555	7.86038	0	6.34955	0	6.03272	8.12502e-38	2.78991	0
Trim30	NM_009099	7.84996	0	3.45626	1.82169e-44	2.24713	4.23546e-16	1.27035	0.00662
Slfn9	NM_172796	7.8027	0	4.23458	9.076e-30	2.65679	2.05945e-21	1.46934	9e-05
Pbk	NM_023209	7.70455	0	6.85522	0	8.49625	1.4013e-45	4.34547	0
Clec4e	NM_019948	7.69968	0	5.76539	0	4.99673	0	3.63556	0
Smc1b	NM_080470	7.69605	1.03596e-08	3.02485	0.00022	2.63436	2.20559e-08	1.54735	0.12847
Mastl	NM_025979	7.59566	9.86805e-13	6.43706	2.09182e-14	3.75208	1.09553e-09	3.52227	1.65856e-06
Mpa2	NM_008620	7.58752	0	8.38167	0	1.59758	4.3349e-18	1.56279	8.49725e-09
Clec5a	AK036697	7.58688	7.25893e-06	11.9621	4.60956e-08	7.07522	7.01386e-17	4.55463	0
Lemd1	XM_129400	7.57691	1.45501e-07	5.74591	1.57868e-13	5.30768	5.20117e-13	5.42286	1.39789e-31
Ms4a11	NM_022431	7.56467	0	5.36379	0	4.19903	9.70597e-35	3.41165	0
Ercc6l	NM_146235	7.51637	6.50727e-25	5.28423	1.08881e-10	3.03962	2.88276e-09	2.86751	1.96829e-06
Slfn8	NM_181545	7.50213	0	4.27131	3.02225e-11	2.36225	5.38007e-32	1.23255	0.10011
Ms4a4c	AB026045	7.49373	0	3.25429	1.48044e-23	2.8375	2.74489e-20	2.06171	2.72056e-11
2310031A07Rik	AK009549	7.45078	2.61062e-42	2.47123	3e-05	1.89823	7e-05	1.41134	0.05365
C3ar1	NM_009779	7.44843	0	5.57165	0	4.29875	1.67743e-21	3.81603	3.06255e-27
D11Ertd759e	AK173199	7.42276	2.32071e-29	4.01908	4.21317e-26	1.82798	6.7664e-09	1.12547	0.04409
Rtp4	NM_023386	7.41928	0	11.4435	0	2.73291	2.1962e-14	2.05245	6.50293e-34
LOC434248	XM_486013	7.39474	1.15633e-19	3.42275	4.36326e-08	1.9993	0.00375	2.39822	5e-05
H2-Q8	NM_023124	7.34567	0	7.18872	0	3.28018	0	2.3853	0
Oas3	NM_145226	7.3428	1.78406e-29	1.67706	0.34548	2.43624	0.00568	1	1
Ly6f	NM_008530	7.29577	8.54288e-28	7.04558	1.14789e-36	5.07907	8.20231e-20	5.48795	1.33405e-30
Hmmr	NM_013552	7.23976	0	4.16426	6.76479e-19	4.51988	0	3.55228	2.16608e-24
2010002M12Rik	AK090072	7.20051	0	3.24061	0	2.46059	8.68805e-44	-1.10269	0.29349
A530032D15Rik	NM_213615	7.19704	5.80538e-34	2.21077	1.07769e-12	1.86972	1.20507e-06	2.21944	3.79373e-14
1110002J07Rik	AK078597	7.18841	1.1806e-06	2.3572	2e-05	7.27824	0	8.86627	1.12659e-37
9930111J21Rik	NM_173434	7.18109	0	4.32638	0	2.14122	1.57574e-22	1.31908	0.06437
9930022N03Rik	NM_177363	7.12169	3.66611e-20	4.64068	5.99606e-16	3.62264	5.92619e-07	4.24363	6.67682e-25
Batf2	NM_028967	7.11774	0	7.11132	0	1.21293	0.01954	1.11254	0.11159
Lrrc25	NM_153074	7.10821	0	5.04246	0	3.3279	0	3.25136	3.29903e-26
AI447904	NM_175026	7.0948	0	1.42576	9.59621e-10	1.96184	6.44065e-26	1.16508	0.09473
Esco2	NM_028039	7.08743	1.43081e-23	6.19927	0	8.99551	0	2.86091	2.52757e-06
AK042495	AK042495	7.06253	2.91389e-13	5.98993	1.26537e-42	7.15871	3.1629e-30	4.90637	3.39009e-06
BC010462	NM_145373	7.03443	0	5.83422	0	3.95885	1.81868e-18	2.43062	2.85262e-21
Slc7a8	NM_016972	7.02112	5.74532e-44	3.64006	1.03285e-29	2.51636	8.74709e-16	1.6674	0.00719
4922501K12Rik	AK076630	7.01131	1.54374e-25	2.53135	4.377e-09	2.54361	0.00035	1.74864	0.00339
Ect2	NM_007900	7.0024	4.50843e-09	5.47901	8.39241e-18	2.79467	2.44948e-11	1.90949	5.4016e-06
Rad51l1	NM_009014	6.97004	3.26825e-16	3.15879	7.41956e-07	5.47396	4.1595e-11	2.74391	1.00499e-06
9130022K13Rik	NM_029419	6.95143	0	5.76753	2.8026e-44	2.20291	5.44097e-18	1.40586	0.00026
E430029J22Rik	AK088880	6.92271	0	2.14343	3.29312e-08	1.04492	0.44283	-1.20383	0.00121
D11Lgp2e	NM_030150	6.90857	0	3.11292	0	2.38635	1.54423e-42	1.13631	0.22534
Numa1	AK082639	6.89803	0	7.01116	0	1.98843	3.64707e-07	1.6185	0.00039
Fgl2	NM_008013	6.86581	0	4.59723	0	1.53733	5.15216e-16	1.38512	6e-05
Lcorl	AK076240	6.80642	8.57804e-18	6.65087	2.48036e-06	9.51545	1.9728e-14	4.60494	8.18218e-41
LOC240921	XM_136331	6.79365	1.12104e-44	1.85415	3.88711e-13	1.8785	7e-05	1.40306	0.08051
1810023F06Rik	NM_145449	6.76702	0	4.7183	1.04199e-11	3.8213	5.94402e-27	1.16136	0.61293
Cdc25c	NM_009860	6.70709	1.37885e-28	2.64537	1.76061e-08	2.43354	1e-05	2.17528	2.77705e-08
Ccl3	NM_011337	6.70353	0	6.24005	0	5.8638	0	6.06101	0
Ccnb1	NM_172301	6.68418	0	5.80283	0	6.07772	1.10292e-22	3.1962	9.80159e-28
Kif11	AK050778	6.6786	1.82869e-21	7.5168	2.92297e-14	6.45398	1.34614e-15	3.38225	8.212e-11
Fbxo43	AK030012	6.67614	1.83327e-14	3.48363	4.39655e-12	2.05932	0.01404	1.98839	7.49826e-06
BC037703	NM_172295	6.65797	8.87263e-10	8.6006	6.98614e-21	11.2419	3.19901e-11	8.69592	2.63231e-14
Cep55	NM_028760	6.60613	4.48012e-33	5.41655	0	7.30059	0	3.22785	4.48597e-11
9530076L18	AK035610	6.59491	0	4.26669	4.38113e-10	4.57084	4.37004e-11	2.02839	0.02583
Ch25h	NM_009890	6.58066	0	4.73006	0	6.25938	0	5.13419	1.20525e-24
Epsti1	NM_029495	6.57689	0	3.3213	0	1.88271	4.88361e-15	1.32513	0.00041
LOC434341	XM_486147	6.55499	5.1406e-22	5.62188	1.6309e-29	1.28649	0.01831	1.04102	0.84872
Ptx3	NM_008987	6.55076	7.84836e-10	3.96561	7.26834e-23	6.27617	0	4.81566	5.71777e-16
Morc1	NM_010816	6.5366	0	4.55483	2.59885e-41	5.27797	4.5304e-41	3.39029	9.47357e-19
Gjb4	NM_008127	6.50237	2.12399e-19	3.12203	0.00022	5.75492	4e-05	2.5932	0.0002
D14Ertd668e	NM_199015	6.47325	1.0235e-38	3.83816	0	2.03009	6.50573e-12	1.14671	0.22971
Ms4a6c	NM_028595	6.45398	2.58059e-27	4.58905	4.21791e-43	2.65154	1.01235e-14	2.46495	1.85899e-11
Ccr5	NM_009917	6.45005	0	5.60463	0	3.56961	6.60046e-32	3.18894	1.47503e-27
Wbp2nl	AK015863	6.44528	2.29281e-18	4.74716	9.43773e-20	4.1567	1.03905e-08	5.18404	2.24025e-09
Il1a	NM_010554	6.39655	0	5.8556	2.45201e-27	4.72697	2.5839e-27	4.70089	0
Cd274	NM_021893	6.3959	1.19152e-28	6.64359	1.26117e-44	2.0503	9.38924e-35	1.82415	3.27421e-10
Pdyn	NM_018863	6.35395	0	4.6033	0	13.0427	6.44932e-40	4.5502	0
Gpr109a	NM_030701	6.35028	0	5.73679	7.43131e-24	4.89489	4.3003e-18	5.0448	5.26328e-42
C130026I21Rik	AK016231	6.34382	0	3.06659	0	1.57742	6.71787e-10	1.38477	6.64727e-06
Shcbp1	NM_011369	6.34174	0	5.37287	4.2039e-45	7.08606	0	3.6928	0
LOC432555	NM_001024230	6.33117	1.34349e-29	5.45561	3.15292e-42	1.67877	3.1705e-09	1.16157	0.17251
9130218O11Rik	NM_177820	6.32365	0	5.6848	0	1.14553	0.27579	-1.03267	0.80297
Aurkb	NM_011496	6.32283	6.9202e-36	5.58975	0	5.51323	0	3.79851	0
Slc26a4	NM_011867	6.31444	0	5.84925	0	9.29935	0	6.39627	0
NAP029508-1		6.31209	0	3.98117	0	3.02046	0	2.0127	6.15624e-11
Xcl1	NM_008510	6.2697	6.39327e-29	5.41143	1.3098e-25	4.34066	4.17897e-25	3.77089	5.88905e-19
Oas1d	NM_133893	6.26227	0	3.11556	1.49644e-08	2.33852	1.5708e-13	1.05737	0.69021
BC013672	BC013672	6.23284	3.0771e-40	2.9168	1.11043e-27	2.25291	9.37174e-13	1.11722	0.37646
9030611K07Rik	NM_001001495	6.22805	0	4.985	0	4.23131	5.60519e-45	2.96371	1.03337e-10
Serpina3m	NM_009253	6.22584	0	4.65361	0	4.65978	0	3.27061	0
Mrgpra2	NM_153101	6.2222	0	4.96997	2.50823e-17	4.21075	1.45984e-12	2.62001	1.81224e-14
Cenph	NM_021886	6.20211	0	5.10854	5.26323e-40	5.09518	1.57108e-30	3.3101	6.65988e-27
Cfb	NM_008198	6.20028	1.8815e-22	4.34362	1.34651e-41	3.21329	2.16849e-30	2.84373	5.97028e-28
4930438A08Rik	AK015331	6.19314	1.94638e-26	6.87948	4.57014e-38	1.09481	0.44646	1.38589	0.10464
Tyki	NM_020557	6.12146	0	3.60908	0	2.15932	5.22588e-40	1.07428	0.29081
Mmp13	NM_008607	6.1187	0	5.90762	0	3.25305	1.94916e-35	3.36328	9.74758e-37
Iigp2	NM_019440	6.11341	3.82192e-27	9.07599	8.93854e-29	1.9624	6.70182e-09	1.50721	0.00033
Cspg2	AK083723	6.07078	7.3789e-12	2.5562	0.00069	4.5262	1.78421e-12	1.24258	0.37777
Gbp2	NM_010260	6.06227	1.00266e-24	6.03096	3.58568e-39	1.39492	0.00018	1.13815	0.06448
Itlna	NM_010584	6.06123	8.32596e-13	6.03314	0	5.28952	0	6.36442	0
Med12l	AK129412	6.05495	9.97108e-14	4.74635	6.53519e-08	3.36833	3.21957e-07	6.12677	1.33776e-11
1700057G04Rik	XM_135054	6.0404	5.85072e-12	2.0564	0.14874	2.34708	0.00088	2.41054	0.05926
Etos1	NM_053258	6.03463	7.17774e-06	3.85953	1.57702e-08	2.60731	0.01068	4.91896	1.93349e-07
Ccne2	NM_009830	6.02924	0	5.02369	4.33922e-29	4.35754	2.8026e-45	2.87723	1.13641e-16
Alox12e	NM_145684	6.022	3.15237e-38	5.47307	0	1.31063	0.01107	1.1507	0.06116
BC057170	NM_172777	5.99123	0	6.66394	0	1.22975	0.0003	1.16797	0.00445
Fbxo39	XM_282966	5.97003	8.40779e-44	4.84824	0	1.3234	0.00082	1.57447	6.73247e-06
Il1f9	AK081783	5.96173	3.67127e-32	2.51043	3.50708e-15	4.79218	1.25688e-26	3.331	0
Cd177	NM_026862	5.95069	0	5.62842	0	4.86959	2.22311e-31	4.31469	0
2210415F13Rik	NM_027339	5.93856	6.16028e-15	1.47474	0.00055	3.5163	5e-05	1.56112	0.02257
Depdc1a	NM_029523	5.93035	0	5.23446	1.01131e-34	5.7292	8.40485e-21	3.10882	8.03781e-35
Ifi27	NM_029803	5.90557	3.29763e-17	1.3864	2e-05	2.5115	5.12073e-12	-1.22894	0.00249
C1qb	NM_009777	5.89364	0	4.83127	0	2.74826	6.28461e-26	2.62734	7.39394e-18
Ckap2	NM_001004140	5.88182	0	3.94166	0	4.77436	0	2.41973	3.69914e-15
Pbef1	NM_021524	5.86953	0	4.3019	1.477e-25	1.11694	0.13663	-1.18367	0.11858
Cxcl12	NM_021704	5.85179	0	4.58925	0	4.26175	0	3.24296	5.58872e-36
AK078008	AK078008	5.84304	0	4.34544	1.59142e-33	5.55648	0	3.40026	0
Ccdc99	NM_027411	5.83847	0	2.57051	4e-05	4.02988	4.20029e-25	2.76591	9.37534e-09
Mela	NM_008581	5.82314	0	4.98026	3.28265e-11	2.70738	2.45762e-34	1.05469	0.50668
BC055004	NM_001013773	5.78043	9.3713e-35	5.66814	0	6.7134	0	5.54813	0
TC1416031		5.76831	8.40779e-44	2.94806	2.08643e-11	2.53444	5.65644e-15	1.4075	0.00117
2210407C18Rik	NM_144544	5.76829	3.45173e-37	2.87974	1.03629e-20	14.2711	1.4013e-45	4.44103	9.17324e-39
Dmbt1	NM_007769	5.7651	2.31018e-14	4.60439	4.77865e-11	6.82199	0	4.05511	2.19851e-12
Troap	AK021408	5.75719	3.05767e-39	2.89561	1.51631e-20	3.13914	3e-05	2.7679	1.02526e-08
TC1433768		5.74664	1.39283e-35	5.02701	0	4.32421	1.53703e-28	3.78636	0
Kcnj10	NM_020269	5.73069	0	2.90129	1.45322e-24	2.24165	1.04484e-14	1.94941	1.01802e-13
Dck	NM_007832	5.68728	1.24839e-26	2.97009	9.00443e-10	2.50014	1.90798e-10	1.99002	1e-05
9030625A04Rik	NM_172488	5.68233	0	3.64611	0	2.15462	2.98135e-19	1.81146	2.2293e-15
Chek1	NM_007691	5.64343	3.85254e-26	4.91295	0	5.15586	4.34122e-42	3.22775	6.83372e-25
5730507H05Rik	AJ237585	5.62711	3.30371e-26	4.92923	6.20739e-35	5.93648	0	3.28518	9.74667e-14
Slfn10	NM_181542	5.60733	0	2.69819	0	2.19057	6.05716e-26	1.47943	3.57219e-14
4930599N23Rik	AK016417	5.52123	6.13181e-34	2.34638	1.55473e-23	1.88557	7.38113e-11	1.22556	0.01664
Cd86	NM_019388	5.51533	7.95104e-22	3.66805	2.40351e-37	2.23877	1.55362e-07	2.13313	2.49191e-33
Csf3	NM_009971	5.50941	4.26808e-09	8.43664	1.75588e-14	4.89159	4.42948e-25	7.50651	9.98969e-15
Bst2	NM_198095	5.5021	3.87997e-38	4.06532	0	2.05711	1.36168e-23	1.05332	0.58069
AW112010	AA726875	5.49373	5.14253e-15	5.69528	4.58333e-18	1.67237	1e-05	1.55867	0.00018
E2f8	NM_001013368	5.48399	2.24378e-31	4.68828	2.57917e-28	4.66547	3.34668e-28	2.63965	3.51955e-14
Arg1	NM_007482	5.47296	0	3.45599	1.01073e-25	3.4386	0	3.23324	1.38533e-39
A2m	NM_175628	5.4642	1.09918e-24	3.2008	4.7631e-22	1	1	2.59615	0.00254
Ctla4	NM_009843	5.44942	2e-05	3.61672	3.82045e-06	2.18621	0.00266	2.095	4.29315e-08
Ctdsp1	AK080090	5.44619	7.55373e-09	1.66698	0.47724	2.91548	0.00213	1	1
Brca1	NM_009764	5.44098	1.67232e-11	5.51065	2.28893e-07	2.4771	0.0003	4.7728	6.35345e-10
4833432M17Rik	AK029421	5.43729	1.47207e-17	3.96313	3.49667e-23	4.55721	4.45135e-35	4.04094	1.43481e-35
Ly6i	NM_020498	5.43655	1.65507e-41	4.6911	0	1.77939	9.83555e-17	1.8819	9.87984e-18
Hk3	XM_127381	5.41989	6.59092e-30	4.9671	0	1.99408	5.58199e-15	1.997	1.59219e-12
Steap4	NM_054098	5.41967	4.9072e-39	5.80506	0	5.71215	0	5.01229	1.18249e-40
Il18bp	NM_010531	5.4169	5.01203e-36	5.48243	0	2.28066	1.30396e-19	1.6112	6.75161e-17
Klra17	NM_133203	5.40758	1.62046e-33	3.19729	0	2.33735	5.55755e-06	3.20615	1.21029e-17
Olfr430	NM_146718	5.40159	0	3.42018	0	2.169	1.16754e-06	1.76297	0.00015
NAP029234-1		5.3924	4.59497e-10	1.76555	0.00065	2.12528	2e-05	2.12634	0.00361
Fignl1	NM_021891	5.37677	0	4.85481	4.16563e-34	5.30064	0	3.20822	0
C920009B18Rik	AK040102	5.37464	3.10374e-21	1.78597	0.0024	1.37896	0.00046	1.55067	2.25881e-08
9830147J24Rik	NM_145545	5.37232	0	7.69394	0	1.05379	0.69815	-1.10398	0.19938
Gpr15	XM_156321	5.36154	0	2.48924	1.00476e-09	1.83416	9.57841e-17	1.58694	0.00056
Rad51	NM_011234	5.36038	0	4.84308	0	5.18005	0	3.2015	0
Pla2g7	NM_013737	5.35975	2.2818e-17	3.61429	0	1.77292	1.20171e-18	1.74219	7.79217e-21
Ptafr	AK032547	5.34099	3.15187e-32	3.22371	9.74413e-26	2.71477	2.46085e-32	2.81527	4.03898e-25
Fgl1	NM_145594	5.34047	1.4013e-45	2.82099	4.7534e-06	6.26237	3.07024e-25	4.53674	0
Tnf	NM_013693	5.33758	0	4.77922	0	4.39749	0	4.55999	0
Stil	AK041653	5.33559	0	4.25341	0	5.61755	0	3.22432	9.35596e-39
Retnla	NM_020509	5.32457	4.96401e-16	4.89268	1.12185e-26	5.00915	3.94128e-17	3.55285	2.04165e-12
C79407	NM_172578	5.32351	0	4.40517	6.52304e-42	5.71136	7.20641e-33	3.28775	1.19701e-23
Neil3	AK031027	5.29939	3.33675e-21	7.84603	7.14418e-16	5.33992	1.98871e-11	3.23576	0
Gtse1	NM_013882	5.27615	6.1892e-19	3.27991	1.95513e-09	3.46178	1.69799e-32	2.24346	1.22274e-14
Usp18	NM_011909	5.26868	0	3.0313	0	2.18447	2.22012e-26	-1.15297	0.22026
Hpse	NM_152803	5.25542	2.57915e-25	2.66952	3.0268e-43	2.00484	1.70652e-14	1.59824	2.87811e-07
Ckap2l	NM_181589	5.24847	0	3.99316	0	4.648	2.8026e-45	2.82863	6.57179e-19
Klrk1	AF054819	5.24126	0	2.92173	6.17086e-30	1.51794	3.07243e-07	1.47829	1.07851e-07
Uhrf1	NM_010931	5.24062	0	4.73516	6.89593e-25	4.52338	0	3.22968	6.63517e-16
Trem3	NM_021407	5.22752	0	3.79563	4.59675e-36	3.16953	2.77562e-32	2.26045	1.01781e-20
LOC622976	AK080287	5.22073	6.97251e-11	1.96066	0.00707	3.64053	3.77428e-18	2.16468	3.69721e-31
2610016C23Rik	NM_027930	5.20969	0	4.72003	7.82387e-40	3.71033	4.39272e-25	2.53366	3.00566e-17
Birc5	NM_009689	5.20171	0	4.73715	0	5.36118	0	3.35543	0
Polq	NM_029977	5.19723	1.77381e-08	3.36509	6.78394e-13	4.34047	2.0021e-08	2.81639	1.96474e-08
Ibrdc3	AK015966	5.19076	0	4.46229	0	2.10801	1.42116e-14	1.98352	8.56067e-22
Cenpe	AK049676	5.18975	9.4852e-38	4.2447	0	4.90837	0	2.92142	1.42844e-21
Nusap1	NM_133851	5.17616	0	4.5993	0	5.25731	0	2.67457	6.93397e-12
Exo1	NM_012012	5.16862	0	4.30522	0	5.88037	0	3.92318	5.2178e-36
Ms4a7	NM_027836	5.16405	0	2.41776	0	2.73993	5.1836e-26	2.95524	0
NAP007796-001		5.15791	1.11926e-31	2.69171	4.69586e-40	1.77379	1.0548e-15	-1.27302	0.02235
BC013712	BC013712	5.14925	0	2.66347	1.22369e-32	1.44886	1e-05	1.47303	2e-05
Tap1	NM_013683	5.13671	2.94273e-44	5.20873	0	1.40322	0.00023	1.46463	2.14086e-06
1700112C13Rik	NM_183103	5.13003	1.92629e-11	1.50228	0.46984	1.27835	0.5715	1.4249	0.38785
4930547N16Rik	BC070476	5.12608	2.72168e-36	5.73902	8.05145e-34	6.18884	0	3.72418	0
Ttk	NM_009445	5.12473	0	6.73872	1.08541e-19	4.47897	1.74665e-39	2.5418	1.34995e-12
ENSMUST00000082107		5.10571	0	2.6518	3.31961e-07	1.41435	0.00052	1.01045	0.90988
Ifit3	AK077243	5.10403	3.46949e-21	2.3528	5.15749e-35	1.85415	3.83559e-21	-1.26032	0.0662
1300002K09Rik	NM_028788	5.10268	8.23229e-15	1.75896	0.00949	3.54328	0.0001	3.85021	2.23337e-10
Cdca5	NM_026410	5.06606	0	4.41025	0	4.49363	1.4013e-44	2.93009	3.86492e-41
2600011E07Rik	NM_028113	5.05728	2.63489e-31	3.757	1.54077e-39	5.1035	0	4.81606	0
Cysltr2	NM_133720	5.04663	0	2.63387	1.49148e-12	1.9626	4.02079e-08	1.41701	0.00251
Aytl1	NM_173014	5.02679	0	3.47765	2.77114e-36	2.02644	4.29133e-14	1.74248	3.65957e-14
Gpr35	NM_022320	5.00419	3.42149e-18	2.51928	1.93482e-30	2.43296	1.12776e-10	2.82111	5.01698e-27
Hemgn	NM_053149	4.99964	2.01402e-08	2.97349	0.00022	1.79001	0.02463	-1.43745	0.03331
Ddx4	NM_010029	4.99215	4.45358e-32	-1.08299	0.23016	1.12551	0.05751	-1.26183	0.00599
Ppfia4	AK173053	4.98832	4.989e-21	2.65016	3.8563e-13	1.90133	4.67633e-06	1.90703	1e-05
2810433K01Rik	NM_025581	4.98291	0	4.75009	0	5.88231	4.2039e-45	3.51635	0
Fyb	NM_011815	4.97917	1.15978e-40	2.82832	2.05183e-36	1.75785	1.72864e-13	1.86131	3.08015e-24
Gvin1	NM_029000	4.9736	0	8.01991	0	1.62822	2.32504e-13	1.0567	0.56963
Ly86	NM_010745	4.94732	0	3.72712	0	1.98049	1.31161e-29	2.08357	1.85604e-06
Tnfrsf9	AK019885	4.94572	2.84914e-19	4.56197	1.12104e-44	4.14773	3.13814e-16	3.45855	1.12104e-44
Slc6a19	NM_028878	4.92876	6.06692e-08	-1.14466	0.63987	-1.60192	0.35499	-1.47571	0.59071
Tlr6	NM_011604	4.90702	1.47979e-13	3.85858	2.08768e-16	3.08557	4.38791e-16	2.74541	9.21996e-16
Gpr65	NM_008152	4.90212	1.89472e-29	3.16518	3.96636e-24	1.70276	7.71832e-10	1.57141	8.59026e-07
Zbp1	NM_021394	4.89549	3.82817e-11	4.97404	1.25577e-26	3.3246	3.26609e-26	2.04068	6.77783e-17
Slamf7	NM_144539	4.88747	0	2.97708	0	1.51309	1.44318e-13	1.37198	8.79501e-09
Car13	NM_024495	4.87493	1.4013e-45	2.85953	2.76317e-25	3.80423	5.3793e-23	2.41451	2.60796e-41
Hist1h2af	NM_175661	4.86557	3.33549e-32	4.28604	0	4.25177	5.10964e-29	3.59141	3.17151e-20
Slfn1	NM_011407	4.8597	0	3.96455	1.02483e-39	2.29107	4.72589e-33	2.3952	1.56453e-24
Casp4	NM_007609	4.8594	6.50202e-43	3.72633	1.56883e-33	2.85653	1.19354e-22	2.23699	3.08782e-14
Tgfbi	NM_009369	4.85261	0	3.2576	0	2.84806	8.16507e-36	2.62628	3.55617e-30
AI451617	NM_199146	4.83775	9.45131e-34	2.80448	1.05261e-23	1.82652	9.47665e-12	1.22296	0.00796
Cd72	BC003824	4.83033	2.26207e-37	1.87761	6.04875e-26	1.31622	9.81553e-08	1.66645	2.33194e-14
Melk	NM_010790	4.82804	0	3.64786	7.84727e-44	5.29109	0	3.01627	1.02198e-36
Rgs1	NM_015811	4.8197	0	2.48153	3.534e-13	2.58425	1.93331e-12	2.05141	4.8296e-28
Cdc2a	NM_007659	4.81437	1.04725e-30	4.22626	0	4.90346	2.93176e-35	3.40708	0
Tnfrsf14	BF580152	4.81394	8.40779e-45	3.15185	8.58101e-23	1.41185	2e-05	1.46519	0.00123
Bcl2a1c	NM_007535	4.77391	0	4.21072	0	3.08887	6.32154e-24	3.37624	0
Mlkl	AK018636	4.76708	1.7112e-24	3.1808	5.13846e-28	1.7157	1.34206e-11	1.31464	5e-05
9430083I22	NM_177848	4.76553	1.55237e-33	4.68832	2.17146e-16	7.75958	0	4.40732	1.27209e-29
Sgol1	NM_028232	4.7294	3.35239e-33	4.3161	0	4.9631	0	3.12875	0
1810065E05Rik	NM_027239	4.72767	3.54616e-06	-1.96931	0.19991	1.68416	0.13582	1.06478	0.90821
Ccna2	NM_009828	4.72072	1.03462e-40	4.21365	1.86468e-31	4.71507	9.17126e-23	3.02643	5.61359e-17
Psmb8	NM_010724	4.71787	2.78798e-20	4.54634	4.27253e-25	1.54045	6.45491e-07	1.50384	7.73485e-09
Cabp4	NM_144532	4.70714	5.53823e-35	3.44564	1.691e-33	1.80931	0.07627	1.29702	0.14388
Klra16	NM_013794	4.68763	0	3.03865	0	1.59227	2.37035e-09	1.68769	1.9021e-09
Mcm10	NM_027290	4.67652	5.1848e-44	3.46683	5.53173e-20	3.64805	1.96961e-40	2.76402	1.3251e-31
Wars	NM_011710	4.66793	2.69926e-26	5.6006	5.52626e-33	1.2028	0.00972	1.18014	0.05673
Hemt1	NM_010416	4.66698	3.25266e-10	2.49728	0.00044	2.06879	0.15706	1.50718	0.0334
LOC434689	XM_486560	4.66245	0	3.49313	4.62428e-44	4.9708	9.43539e-40	4.09099	1.64225e-22
Lrp8	AK030143	4.66225	6.26909e-08	2.79735	2.10412e-15	2.93412	2.3346e-13	2.99223	8.42999e-28
TC1518060		4.65091	1.13269e-21	4.47504	5.54099e-23	3.43831	2.51762e-32	2.98419	4.18684e-15
Lgals3bp	NM_011150	4.64605	3.56856e-22	3.49619	6.51604e-43	2.265	3.20552e-23	1.70234	1.49245e-19
Emr1	NM_010130	4.6414	0	2.94583	1.5892e-34	1.73112	3.97086e-10	1.90568	9.60312e-07
H2-Q2	NM_010392	4.63329	4.52332e-22	3.10666	4.66675e-15	1.22231	0.04963	1.3622	0.03527
A_52_P1173559		4.63252	0	4.89763	0	1.11447	0.14653	1.13602	0.09859
A_52_P764477		4.60045	0	3.14887	0	1.76474	4.37982e-13	1.73655	3.18414e-10
Agr2	NM_011783	4.59261	0	3.50938	0	5.05091	0	2.43296	1.27912e-31
Oasl1	NM_145209	4.57982	9.4837e-18	3.30622	1.03287e-09	3.00841	1.20823e-10	1.82245	7.34368e-06
Clec2g	AK036971	4.57759	2.26296e-09	1.24923	0.4956	2.21341	0.0017	2.46912	7.66401e-09
Cdkn3	BC049694	4.57203	0	4.02607	0	4.14033	0	3.08624	0
Cenpf	XM_129658	4.56127	7.79963e-42	3.5397	1.4618e-20	4.25161	2.28279e-28	2.5049	4.57339e-11
Hspa1a	NM_010479	4.54177	6.29378e-32	3.47441	7.98305e-34	2.83781	2.82688e-22	2.91275	1.55852e-23
Tpx2	NM_028109	4.53705	6.41271e-40	3.47846	1.02004e-20	4.05139	2.80215e-26	3.00312	3.18752e-23
Ccr2	NM_009915	4.537	1.09537e-18	4.46863	7.92878e-24	3.03527	1.4052e-10	2.91269	1.27205e-36
Kif2c	NM_134471	4.5348	3.88089e-12	4.13415	2.50893e-20	4.86016	2.00961e-17	3.01527	4.51306e-08
Tcstv3	NM_153523	4.52669	4.90454e-44	2.20365	1.67702e-35	1.29996	0.02801	-1.03815	0.69558
Tnfrsf1b	NM_011610	4.52446	0	3.10206	0	2.59402	0	2.52886	0
AK019935	AK019935	4.52058	1.18175e-19	2.98568	7.38825e-15	4.17711	3.91255e-10	3.43869	3.62986e-25
Rad51ap1	NM_009013	4.51588	0	3.57511	8.69673e-34	3.82715	0	2.79015	0
Dcp2	AK017809	4.51329	0	2.08494	3.11549e-15	1.47909	2.24023e-06	1.44966	0.00115
C330027C09Rik	NM_172616	4.51157	2.20145e-22	3.76098	5.93697e-31	4.32078	2.04023e-33	2.38702	2.26073e-11
A530040E14Rik	AK087744	4.49796	0	1.2099	0.00189	1.47936	6.92548e-10	1.80072	3.87426e-19
Fpr-rs2	NM_008039	4.49536	0	4.3368	0	2.40047	6.43507e-11	2.32796	2.63766e-27
Ifi47	NM_008330	4.48467	8.93766e-38	4.75968	2.23409e-41	1.67202	1.76081e-08	1.35236	6e-05
Havcr2	NM_134250	4.4793	7.93195e-06	2.46974	2.18505e-08	2.89288	1.43219e-15	2.45761	3e-05
Hist1h3a	NM_013550	4.4694	0	3.48955	0	2.99748	1.87124e-27	2.68883	2.58062e-28
2610002D18Rik	XM_131720	4.46594	5.15999e-31	4.12205	0	4.34147	6.96043e-36	3.19248	2.48144e-31
D2Ertd750e	NM_026412	4.46171	2.41638e-27	3.09221	1.12909e-28	2.9212	1.13983e-24	2.52572	1.41638e-30
H2-M3	NM_013819	4.46088	0	3.27482	1.16245e-30	1.11462	0.11494	1.22378	0.01386
BC089618	BC089618	4.4274	6.29183e-42	5.67811	6.86636e-44	6.39976	7.97759e-42	5.67839	3.95358e-29
2600005O03Rik	NM_183089	4.42454	0	4.35553	0	3.90602	1.45331e-20	3.09147	1.40971e-42
Igsf6	NM_030691	4.40859	0	3.64088	0	2.57975	3.79488e-40	2.25668	1.00431e-29
Kif20a	Y09632	4.40302	0	3.64193	9.34986e-35	4.56063	0	3.03305	4.2039e-45
Clspn	NM_175554	4.40035	3.59997e-08	4.70525	3.82825e-39	4.831	2.33338e-28	2.85846	2.68661e-14
Gm1966	XM_485982	4.39651	0	4.00002	0	1.13363	0.29142	-1.07192	0.53642
BC025462	NM_145946	4.3949	2.53488e-37	3.69477	0	4.09582	0	3.1711	1.1431e-24
Parp14	BC021340	4.39045	3.62237e-36	3.58494	1.11361e-41	1.71474	1.27674e-12	1.33338	0.0007
Spbc25	NM_025565	4.38966	0	3.87972	0	4.38437	0	2.63876	3.33767e-18
LOC231869	XM_620271	4.38732	5.75976e-41	4.14682	2.27023e-33	4.23679	4.17586e-29	2.81984	0
Fcgr2b	NM_010187	4.37509	3.32586e-27	3.07168	1.47017e-32	2.63037	8.09271e-17	2.63613	2.07604e-22
Mmp8	NM_008611	4.37453	3.26792e-26	3.50821	3.89418e-31	3.58271	0	1.86964	1.74716e-16
Il12b	NM_008352	4.37204	0	4.84046	0	6.49969	0	3.26878	0
Sfrp1	NM_013834	4.3679	0	2.54023	3.23245e-08	2.22079	7.2395e-09	1.44837	0.0399
2010001H14Rik	NM_027227	4.3658	8.87599e-34	1.9001	0.00103	7.34568	1.72722e-09	2.38359	1.04063e-06
Ctss	NM_021281	4.36403	5.85996e-13	2.93082	3.93354e-08	1.64228	0.00296	1.6494	0.00226
Cenpk	NM_021790	4.34428	0	3.826	0	4.65053	0	2.85611	6.67232e-25
Kif22	NM_145588	4.34245	0	3.55549	0	3.86814	3.27904e-43	2.93735	1.17454e-38
H2-T22	NM_010397	4.33952	0	2.89419	5.64235e-28	1.14412	0.07635	-1.00495	0.96281
Slc2a6	NM_172659	4.33897	1.41896e-23	3.12478	1.27813e-38	2.69446	3.84132e-36	2.4069	1.81067e-20
Slc5a9	AK033569	4.33636	2.56364e-24	4.0958	0	4.71095	0	3.18728	7.2305e-33
Isg20	NM_020583	4.32986	5.61287e-27	2.3972	7.94573e-40	1.70422	1.64961e-15	1.18962	0.00685
LOC667603	U76754	4.32709	0	2.95986	0	1.42816	0.00033	1.08874	0.57634
4930579C12Rik	NM_175672	4.3242	6.85028e-20	3.7559	6.99925e-35	5.55984	0	5.18222	0
Hpxn	NM_017371	4.31096	5.26535e-21	4.13887	1.06911e-24	3.79028	7.96744e-21	3.535	0
Stfa2	XM_487424	4.30546	0	3.77072	3.49166e-35	3.27915	2.74696e-24	2.45488	2.55728e-26
Gins1	BC027537	4.28027	0	3.38012	0	3.32106	2.89682e-37	2.65428	2.47951e-37
Evi2a	NM_010161	4.27917	0	2.76087	1.51927e-24	2.38884	1.08965e-19	2.38801	1.93098e-18
F630043A04Rik	NM_198605	4.27618	0	3.62645	2.08256e-31	3.32334	3.54561e-37	2.54432	1.11824e-42
Cdca8	NM_026560	4.26628	0	3.88611	0	4.15285	0	3.06207	4.0923e-28
Bcat1	NM_001024468	4.26622	8.56818e-12	3.97831	4.89993e-17	4.81277	4.29218e-42	2.47993	5.34866e-07
Lst1	NM_010734	4.26251	1.16661e-20	2.7193	7.90049e-15	2.20745	9.29808e-10	2.19301	1.45965e-26
Kcna7	NM_010596	4.25898	0	3.4606	1.4013e-45	2.77942	2.30712e-19	2.122	3.26728e-12
Sirpb1	AK054545	4.25596	0	2.65153	2.89785e-30	2.29662	6.08386e-26	2.13994	3.59968e-40
Cybb	NM_007807	4.244	0	3.13832	0	1.48753	6.66753e-10	1.74032	2.22762e-06
Irf1	NM_008390	4.24294	7.13381e-34	4.4369	1.71445e-29	1.09124	0.29488	1.15168	0.06029
Prc1	NM_145150	4.24155	7.00649e-44	3.57218	0	4.53754	0	2.67379	1.39007e-29
Lap3	NM_024434	4.23288	0	3.65516	0	1.49259	3.35954e-07	1.35381	0.00025
Trpm2	NM_138301	4.23244	0	3.45755	0	1.79756	3.60601e-10	1.53329	1.38197e-09
LOC433016	AK089257	4.23218	1.26117e-44	4.23423	0	4.39611	0	2.16672	6.18294e-12
3100002H09Rik	AK013916	4.23187	4.19817e-06	2.11198	0.02302	-1.1558	0.79616	1	1
Spag5	NM_017407	4.2317	1.04257e-42	3.51873	5.24097e-35	4.21601	2.00554e-25	2.94633	7.40869e-37
Dppa3	NM_139218	4.23043	3.72992e-34	3.01134	2.08218e-23	4.18026	2.31759e-09	6.88471	4.76441e-44
Gzmk	NM_008196	4.22805	0.00127	4.51416	1.98268e-09	4.43895	7.7052e-11	1.11685	0.28912
Ms4a4b	NM_021718	4.22261	0	1.45018	2.58661e-06	1.16662	0.00818	-1.06806	0.59315
Sgol2	NM_199007	4.21744	1.28559e-20	3.73655	0	4.49928	0	2.62287	8.198e-21
Mt2	NM_008630	4.21313	1.06495e-15	4.25404	6.1491e-23	5.35996	1.45355e-28	3.72417	3.3204e-36
4930427A07Rik	NM_134041	4.20258	2.93679e-35	2.51883	4.10905e-13	2.45789	1.24851e-06	2.26632	1.32242e-10
Drd4	NM_007878	4.19571	3.17226e-06	1.31563	0.13409	1.70847	0.05714	1.11678	0.38224
AK082307	AK082307	4.19289	5.09002e-08	2.81342	1.56609e-07	4.19713	7.40664e-24	4.00168	0
Nts	NM_024435	4.19153	1.21913e-43	3.26084	4.86258e-35	2.79608	3.91767e-25	1.69116	1.01207e-18
Trex1	NM_011637	4.18859	1.68677e-20	2.43728	8.65817e-19	1.92666	7.15866e-11	1.31417	0.00025
Fcgr3a	NM_144559	4.18452	2.09477e-23	3.37546	1.87073e-42	1.13016	0.07943	-1.06158	0.36061
Pou3f1	NM_011141	4.16276	1.76679e-21	1.54788	1.31202e-08	1.14571	0.03464	-1.0718	0.2741
T2bp	NM_145133	4.16276	0	3.6626	0	2.078	2.91161e-38	2.12189	6.22756e-13
Procr	NM_011171	4.15297	0	2.8267	2.27379e-29	1.84964	5.52916e-19	1.61723	3.77961e-16
S100a9	NM_009114	4.15095	1.64846e-25	4.10393	1.91602e-22	4.0604	1.67706e-14	2.36971	7.59253e-18
A630055G03Rik	XM_354943	4.13908	3.90915e-19	2.93655	4.48903e-06	2.63004	3.22898e-10	2.55568	3e-05
Cyp7b1	NM_007825	4.13767	9.34986e-31	3.41246	3.58057e-29	4.609	0	3.66997	8.37578e-39
MGC58177	NM_198666	4.13247	0	3.35645	3.46416e-27	5.44995	0	3.85117	7.37083e-43
A630085K21	NM_177903	4.13035	4.26262e-23	2.92985	1.72449e-09	1.57669	0.35122	3.15349	0.01314
Ifih1	NM_027835	4.12866	5.88545e-44	2.06986	1.44046e-25	1.82437	1.02443e-21	1.15631	0.00385
Lilrb4	NM_013532	4.12765	2.16966e-39	3.21895	4.40013e-37	2.78644	1.31042e-18	2.67155	8.37944e-27
Pdcd1lg2	NM_021396	4.12469	0	3.90365	0	2.65565	2.32768e-26	2.58676	9.38173e-16
Dnase1l3	NM_007870	4.10836	3.88787e-14	3.39612	2.4013e-25	1.03469	0.76293	1.22806	0.00017
Samd9l	AK076557	4.09413	3.52539e-10	1.75906	0.00231	1.06098	0.75453	1.54583	0.1073
Suv39h2	NM_022724	4.08	1.81175e-10	3.52416	4.47411e-24	4.01368	4.82212e-08	2.4836	1.75627e-33
H2-T10	NM_010395	4.07518	0	2.79999	3.74879e-20	1.25691	0.06358	1.11055	0.32552
Darc	NM_010045	4.06969	3.96715e-16	2.25279	1.72138e-13	2.84994	9.74658e-17	2.55545	3.76683e-20
Mafb	NM_010658	4.06712	4.04806e-19	2.76453	1.95789e-19	2.01667	2.06853e-11	2.05228	8.55045e-09
A630026L20	XM_620550	4.056	0	2.69815	7.3472e-11	1.15484	0.12056	1.11885	0.05766
Hspb1	AK019498	4.05521	5e-05	7.85067	3.4295e-13	8.60464	8.75942e-08	5.99742	0.0001
Casc5	AK017750	4.05362	3.66434e-12	3.97404	2.9247e-06	4.02234	4.39687e-10	2.21355	7.01378e-06
H2-Ab1	NM_010379	4.05181	1.32245e-18	2.85196	9.13647e-43	1.37088	4.28847e-06	1.75436	6.05621e-16
Cdca1	NM_023284	4.04467	0	3.48767	0	3.84559	0	2.57389	0
Dlg7	NM_144553	4.03477	0	3.39876	2.39906e-22	3.39545	8.55435e-38	2.35832	2.61514e-19
LOC327957	XM_282993	4.03041	1.02295e-42	3.20434	0	2.0675	7.48723e-10	2.54565	7.25378e-15
9030421J09Rik	NM_177744	4.02714	0	2.91186	8.34778e-31	1.2743	0.52282	1.47941	0.14836
Aurka	NM_011497	4.02696	0	3.27761	0	3.54329	0	2.31026	6.92102e-16
Parp9	NM_030253	4.02109	0	3.42064	0	1.46892	5.15472e-09	1.08287	0.34771
Il8rb	NM_009909	4.01612	3.38722e-41	4.35247	0	3.28672	0	2.07905	1.15229e-12
Bub1	NM_009772	4.01461	0	3.66881	2.43828e-30	4.32795	0	3.13523	7.42688e-44
Gpr33	NM_008159	4.00707	0	4.76727	7.29208e-41	-1.05534	0.7936	-1.35958	0.07952
Ube2c	NM_026785	4.00418	2.8026e-45	3.36052	0	4.25399	0	2.71945	0
Ceacam19	NM_177036	3.99323	1.81199e-33	3.92084	7.66844e-16	6.82401	5.9018e-32	4.71135	0
Csprs	NM_033616	3.99202	1.88887e-08	1.21074	0.40221	1.49017	0.11074	1.70287	0.04495
Plau	NM_008873	3.9918	2.91641e-08	1.89534	3.82074e-09	1.62617	1.61039e-11	1.50406	0.00096
Pycard	NM_023258	3.99172	0	2.68435	0	1.8384	5.37394e-26	1.80936	6.29978e-22
H2-M10.2	NM_177923	3.98456	6.27445e-08	2.04342	0.00014	1.14246	0.29321	1.0796	0.75668
2300003P22Rik	NM_026414	3.97647	3.2718e-36	3.77198	0	2.80512	0	2.18691	1.96099e-17
Aspm	NM_009791	3.97099	1.48227e-16	3.10899	1.94235e-24	4.70788	4.94207e-33	2.68574	0
TC1491311		3.96938	4.29531e-14	3.32418	7.26349e-30	2.39829	1.84583e-18	2.36177	9.05323e-09
Sdf2l1	NM_022324	3.96317	1.1434e-22	3.64378	0	2.29026	4.00898e-17	2.14791	8.53257e-23
C79127	NM_177691	3.96205	1.28639e-42	4.896	5.47688e-22	2.50545	1.25622e-14	2.567	3.61112e-13
Unc93a	NM_199252	3.9604	1.94967e-13	2.44801	4.58686e-14	1.15071	0.19772	-1.21362	0.28605
Glrp1	NM_008132	3.95983	3.07387e-09	2.70503	9.39699e-06	1.72991	0.05894	1.95547	0.00475
Speer4a	NM_029376	3.95892	2.8026e-45	2.64	9.28799e-16	5.09327	4.40382e-14	2.93624	0
Cenpp	NM_025495	3.95546	6.33617e-24	3.07128	8.27839e-29	3.76818	0	2.55006	7.41697e-13
TC1522631		3.94765	0	3.01244	2.22473e-11	3.07704	1.4381e-09	2.53389	0
Kifc1	NM_053173	3.93608	0	2.72529	5.69585e-21	2.27058	3.61214e-24	2.72821	9.74252e-39
Gda	NM_010266	3.93597	0	3.8012	0	3.43975	4.42394e-37	2.36369	5.47067e-20
Olfr1153	NM_146640	3.93565	0	2.841	0	1.458	8e-05	1.27127	0.00148
Csf2rb2	NM_007781	3.93331	0	3.09878	6.11723e-37	2.4881	2.19809e-19	2.54929	6.93885e-23
B2m	NM_009735	3.93142	0	4.12565	0	1.44652	9.9455e-13	1.19889	0.01657
Slc39a14	NM_144808	3.92838	0	2.90441	6.66432e-18	3.1019	6.45139e-28	2.82462	2.48806e-18
Tmc5	NM_028930	3.9229	3.24541e-42	2.90701	1.51532e-27	4.55876	0	3.16216	7.3869e-39
Mgat4a	NM_173870	3.91973	1.90685e-38	2.88135	0	2.60755	0	2.25568	4.54377e-07
Top2a	NM_011623	3.90692	5.71439e-11	4.11943	1.59608e-37	4.05376	6.63375e-18	2.29728	1.26584e-07
2610021K21Rik	NM_030172	3.90446	1.82169e-43	3.03859	3.95526e-31	3.15189	3.57595e-16	2.35234	1.35831e-06
2610307O08Rik	BC046640	3.90257	0	3.09819	7.42688e-44	2.11775	2.60388e-33	2.07889	2.04433e-15
Ppa1	NM_026438	3.90037	2.80365e-31	3.21615	6.68158e-27	2.18633	4.60865e-12	1.59683	2.16897e-08
6720460F02Rik	NM_144526	3.89542	7.55999e-31	2.9546	1.79389e-14	3.38181	2.98563e-21	2.65236	1.09627e-17
1700129I15Rik	NM_030106	3.89366	2.17851e-09	3.36768	1.96717e-20	1.62964	0.00016	1.39495	0.03444
Htr7	NM_008315	3.89339	0.0004	5.53319	1.11023e-08	2.49908	9e-05	3.80404	1.5945e-07
Vcam1	NM_011693	3.88911	0	3.71215	8.69984e-37	1.90959	1.40645e-22	2.11191	5.20163e-13
9130017C17Rik	NM_027840	3.88563	1.9907e-26	2.59255	1.13077e-14	2.01377	5.53726e-10	2.36818	4.12912e-36
Eif2ak2	NM_011163	3.88445	3.62834e-31	2.61308	4.98936e-21	1.89582	2.07602e-06	1.26856	7e-05
BC018371	NM_153807	3.8749	2.31687e-21	2.92037	0	3.71092	7.93697e-19	3.00174	0
Rab8b	NM_173413	3.86291	0	2.57723	2.62691e-37	2.50365	9.07415e-24	2.2857	4.16426e-38
Cd14	NM_009841	3.85243	0	3.37597	4.05904e-27	3.79737	0	3.66349	0
H2-T23	NM_010398	3.84538	8.97007e-09	3.26612	3.06023e-13	1.0238	0.68747	1.04594	0.45437
Sele	NM_011345	3.84516	0	4.82709	1.47793e-17	4.07614	1.15393e-17	4.21927	0
9330175E14Rik	NM_177146	3.84436	2.8026e-45	4.31981	5.92889e-34	1.83794	9.5368e-16	1.67882	1.51303e-09
Arsi	BC020108	3.83808	1.48358e-31	2.26505	2.33974e-08	3.6505	0	2.6354	8.54117e-28
Piwil2	NM_021308	3.83755	5.04639e-20	3.64488	1.09759e-34	3.70246	0	3.04378	9.82121e-12
Rad54l	NM_009015	3.83702	0	3.70874	2.26661e-30	2.85598	1.9648e-38	2.13163	9.99927e-06
2610040C18Rik	NM_027263	3.83603	0	3.34848	0	2.77165	1.44176e-19	2.91653	4.89697e-22
Pnp	NM_013632	3.82635	3.03726e-14	2.08909	3.23416e-14	1.53892	0.0011	1.40869	0.00856
C1qa	NM_007572	3.81578	0	3.33933	0	2.15053	1.09494e-12	2.12882	1.10164e-15
Cd180	NM_008533	3.80994	3.90696e-32	2.51281	2.12807e-14	1.35595	0.0004	1.66066	0.00083
Mxd3	NM_016662	3.79641	0	3.1346	5.95745e-35	4.0378	9.04532e-30	2.58056	7.63996e-25
Lcp2	NM_010696	3.79584	0	2.90928	6.24803e-32	2.09196	3.52347e-13	2.14224	1.64084e-15
1110017I16Rik	NM_026754	3.79566	1.42981e-27	7.07777	1.55645e-16	2.45408	1.52781e-07	1.09895	0.62349
5031414D18Rik	NM_198642	3.79528	2.28768e-09	1.81242	9.02911e-07	-1.02129	0.79453	1.20358	0.13097
Oas1a	NM_145211	3.79252	1.93232e-10	3.90568	2.05153e-16	2.47904	5.94741e-09	1.92928	1.15978e-18
Mthfd2	NM_008638	3.77878	2.12509e-26	3.25628	2.141e-29	2.33969	1.0755e-23	2.06768	1.62205e-08
Smpdl3b	NM_133888	3.77178	1.4434e-17	3.00452	5.3619e-26	1.65067	2.78655e-06	1.71974	2.24123e-06
Anln	NM_028390	3.76908	0	3.48742	0	3.17539	8.04558e-17	2.05395	6.07618e-35
AK089636	AK089636	3.76672	1.12002e-34	2.13116	1e-05	1.68888	0.03144	-1.0709	0.67732
Smc2	NM_008017	3.76533	5.61503e-07	4.06478	1.03643e-07	2.49163	3.92942e-07	2.20022	1.05781e-09
Ifi203	NM_008328	3.76519	5.06285e-40	1.9096	2.31705e-23	1.38767	6.27878e-07	1.19156	0.0006
Psmb9	NM_013585	3.76163	2.62711e-14	3.83836	7.5473e-35	1.26228	0.00382	1.19735	0.00822
AI662270	AK028715	3.76056	1.30999e-40	3.11435	6.98507e-32	2.07943	5.80588e-09	1.99713	1.02854e-17
Sema4d	NM_013660	3.76038	2.87443e-37	2.41187	2.00164e-14	1.72463	2.78626e-10	1.93368	8.50113e-10
H2-Aa	NM_010378	3.75986	6.939e-34	3.0102	2.8399e-22	1.39559	3.35221e-09	1.75648	1.20164e-06
TC1434027		3.75743	3.50325e-44	3.23739	2.42004e-42	4.06294	2.61535e-20	2.81266	1.11844e-22
Psat1	NM_177420	3.747	0	3.59708	0	2.30923	4.71837e-16	1.63112	1.03252e-07
Iqgap3	BC068159	3.73301	1.4013e-45	2.91038	2.79609e-24	3.38479	2.39935e-27	2.63133	4.85458e-24
Dctd	NM_178788	3.72571	1.90946e-07	2.02565	0.00083	3.44367	1.048e-07	2.29102	0.00174
Creg2	NM_170597	3.72563	0	2.43283	2.42573e-23	2.79253	5.89888e-31	3.10893	7.24196e-30
1100001H23Rik	NM_025806	3.72385	0	2.80368	6.59452e-37	1.62453	3.29474e-08	2.06237	7.90683e-32
Inhba	NM_008380	3.71604	1.19102e-36	2.98381	3.31117e-35	3.43245	9.82865e-29	3.0564	8.39418e-30
Clca1	NM_009899	3.71128	0	2.18541	2.41158e-20	2.11059	1.00195e-15	1.08253	0.34157
Cdca3	NM_013538	3.7017	0	3.3759	0	3.5396	2.15277e-28	2.71168	1.78201e-29
Phb	AK079993	3.70076	1.48954e-10	2.37105	2.39185e-29	1.39769	0.01459	1.4554	0.05246
Csf3r	NM_007782	3.69283	3.64338e-44	3.06535	4.23565e-30	2.51501	2.32155e-26	2.28754	2.2955e-12
Apobec1	NM_031159	3.68608	4.90454e-44	2.24819	3.12637e-36	1.88935	2.03754e-09	1.73168	7.93301e-17
AK037503	AK037503	3.68418	9.76904e-08	2.64445	9.96673e-06	1.93635	0.00033	1.0847	0.61184
Slc37a2	NM_020258	3.68326	2.53035e-28	2.36365	1.74754e-12	2.12532	2.15038e-08	2.07782	9.36881e-30
Casp1	NM_009807	3.673	2.95534e-42	3.18691	0	1.56541	2.2409e-17	1.41476	4.35993e-06
Hist1h1b	NM_020034	3.67046	2.08956e-32	3.43033	3.34108e-22	3.36255	7.66556e-19	3.43453	4.70248e-41
Foxd4	NM_008022	3.67026	1.51827e-29	4.87872	0	4.28822	8.40779e-45	2.5569	1.84281e-26
D4Ertd179e	AK040902	3.66088	6.84048e-35	3.46777	1.41848e-09	1.38793	0.10132	1.46929	0.00049
5430427O19Rik	AK017351	3.65313	8.18798e-17	2.18515	1.33353e-16	2.20443	2.23322e-10	1.99533	4.41475e-15
Tbx21	NM_019507	3.64937	0	2.88983	3.15713e-41	1.53869	1.54115e-06	1.52489	0.00011
E130016E03Rik	BC057604	3.64508	0	3.21883	0	3.55418	0	2.67429	0
Fcgr3	NM_010188	3.63902	7.9946e-16	3.0581	7.35545e-35	2.20039	9.58767e-12	2.22778	1.78809e-16
Insl6	NM_013754	3.62996	0	2.32025	2.03623e-41	1.5942	5.47895e-13	1.38933	6.99206e-10
Sgpl1	NM_009163	3.62623	2.88843e-24	2.62147	4.10577e-08	1.77831	4.2225e-07	1.91672	0.00118
Ncf1	NM_010876	3.62416	1.4013e-45	2.65231	6.76806e-31	1.59734	0.00034	1.84034	5.31258e-12
Adamts3	CK790536	3.62299	0	2.58293	8.88248e-16	1.86579	2.46282e-17	1.69221	2.04619e-07
Cenpm	NM_178269	3.62231	1.24212e-09	3.2015	7.06587e-12	3.15403	9.67721e-17	2.83913	2.37531e-07
LOC331391	XM_285437	3.62191	0.00011	1.3637	0.19958	2.24369	0.02051	2.27017	0.00597
Cd80	NM_009855	3.61991	0	3.04352	0	3.80149	2.68557e-14	2.73673	2.17067e-21
Slamf8	NM_029084	3.61892	9.32877e-28	3.73092	0	1.5728	1.20599e-15	1.65357	5.13711e-14
Hist1h2ak	NM_178183	3.61479	1.2648e-32	3.23452	0	4.10815	3.37457e-36	3.19377	1.67928e-16
Ctsc	NM_009982	3.61243	3.882e-21	2.74509	6.14368e-15	1.97462	6.81145e-19	1.84105	3.2156e-11
2310043M15Rik	AK009785	3.6048	7.03355e-15	1.76693	0.0074	2.45074	1.50053e-07	1.41163	0.00012
Fcer1g	NM_010185	3.60329	1.1155e-17	2.69817	2.22605e-28	1.91307	2.72837e-13	2.07832	1.245e-13
Trip13	AK010336	3.60257	0	3.29843	0	3.66202	3.01491e-27	2.78729	1.31477e-19
Cyp4f18	NM_024444	3.60201	2.89173e-28	2.02347	2.87901e-27	1.92134	2.19641e-18	1.63091	2.96891e-19
F730047E07Rik	BC094429	3.60065	0	3.18296	3.32372e-27	2.35296	1.76728e-11	1.99939	1.10972e-07
A330102K04Rik	XM_283314	3.60057	0	2.85197	2.14546e-40	1.00474	0.98085	-1.19364	0.37585
C920025E04Rik	AK083376	3.59378	3.8231e-06	3.14823	8.34251e-13	1.02372	0.70772	1.04818	0.40721
Mki67	X82786	3.59319	0	3.56646	0	4.48589	0	3.16057	0
Pdcd1	NM_008798	3.59078	4.78009e-30	3.25823	0	2.46249	2.79819e-09	2.1074	2.24948e-19
2610208M17Rik	NM_145626	3.5903	0	2.31392	6.36968e-20	1.03078	0.71949	1.00833	0.93422
Slc11a1	NM_013612	3.58933	3.56265e-26	2.90073	2.09826e-24	2.13443	3.90006e-17	2.26212	1.00475e-23
Il2ra	NM_008367	3.58468	1.22443e-11	2.62965	2.22807e-23	2.546	7.915e-17	2.09082	3.91665e-09
Irf5	NM_012057	3.58218	2.27842e-24	2.2537	9.21143e-37	1.80493	1.17486e-20	2.34932	1.55676e-19
Lama1	AK044510	3.5765	2.74e-09	1.10263	0.53076	2.36258	2.60417e-22	2.77218	5.78901e-21
Pacsin1	NM_178365	3.56713	0	1.4751	1.27581e-06	1.02115	0.82681	1.48769	4.38137e-07
Prr11	NM_175563	3.55312	2.44062e-17	4.07595	1.89843e-14	3.73201	9.61651e-11	1.60299	0.03194
Spic	NM_011461	3.55255	4.75891e-18	1.54656	6.82843e-12	2.68828	2.62557e-11	2.49158	1.10328e-25
Gdf3	NM_008108	3.55112	2e-05	2.52384	0.00039	4.06987	1e-05	4.14631	1.37293e-08
Ms4a4d	NM_025658	3.54459	0	1.21734	0.00063	1.03183	0.60535	-1.29612	0.0347
Hand2	NM_010402	3.53726	8.52037e-17	2.69136	0.00579	1.17648	0.49496	1.07058	0.64362
Parp12	NM_172893	3.5363	1.36683e-29	2.54182	2.08164e-23	1.42957	2e-05	1.06551	0.46224
Lat2	NM_022964	3.53519	0	2.29282	1.63515e-30	1.5979	1.19798e-16	1.84252	2.36634e-11
AK089699	AK089699	3.53445	8.47821e-23	1.98614	3.35698e-16	1.22754	0.00382	1.06504	0.40097
AI452102	XM_287711	3.53392	6.59563e-24	2.39635	0	1.32542	7.83145e-08	1.18928	0.00578
Il23a	NM_031252	3.52787	1.13709e-10	3.76133	3.47649e-07	3.47929	1.35021e-10	3.5789	1.15613e-12
Tcstv1	NM_018756	3.52308	1.14906e-43	1.60161	4.28139e-07	1.40477	4e-05	1.02312	0.79887
Ddx58	NM_172689	3.51567	0	2.15891	1.2261e-15	1.49559	4.5779e-09	1.05824	0.57675
Itga4	NM_010576	3.51468	1.41088e-28	2.04665	1.0553e-09	1.17187	0.07446	1.25912	0.248
Ube2l6	NM_019949	3.50542	8.13009e-11	2.58267	9.53924e-32	1.35702	0.0033	1.10265	0.34949
Nudt5	NM_016918	3.50194	7.97037e-33	2.5348	0	1.65214	6e-05	1.72406	6.22976e-22
Crebl2	AK038845	3.49591	1.27208e-23	2.87702	2.24255e-21	2.04071	1.6963e-09	1.65098	3.14556e-07
Cldn2	NM_016675	3.49449	2.33449e-19	3.10505	2.21552e-34	4.30168	1.67005e-19	3.42894	3.12548e-24
Kif14	BC054123	3.49161	0	2.89212	1.04093e-10	2.80703	3.20771e-20	2.54906	1.06457e-41
Ccdc88	AK019167	3.49047	4.68137e-30	2.55891	1.88118e-13	1.62589	0.00038	1.75835	6.17566e-15
Lass6	NM_172856	3.48995	0	2.61804	2.93152e-13	1.61419	6.56389e-13	1.44488	0.00012
Clec7a	NM_020008	3.4772	9.69407e-28	3.35053	1.23509e-35	2.70973	1.18749e-24	2.92081	0
Itgb2l	NM_008405	3.47695	1.35559e-09	1.9577	0.00259	2.097	6.71995e-08	1.49963	0.0002
A_51_P462771		3.47446	0	2.3976	5.14304e-07	2.42335	4.89424e-39	2.10677	2.65884e-23
Racgap1	NM_012025	3.46986	0	2.85268	0	2.72788	0	2.34161	1.02964e-29
Gm566	BC027668	3.46802	1.06608e-26	3.95354	6.12592e-41	4.88822	1.56385e-42	3.9959	4.9026e-38
Foxm1	NM_008021	3.46744	0	3.04311	0	3.14174	0	2.43583	1.20075e-15
Snx10	NM_028035	3.46661	0	3.35824	0	1.6737	1.91352e-15	1.5253	7.06095e-12
Cbln1	NM_019626	3.46224	2.24281e-33	3.57404	0	2.13897	1.91012e-07	2.29539	7.59687e-25
Akp2	NM_007431	3.45829	1.13323e-41	2.8086	2.85328e-30	2.88787	5.59742e-26	2.76953	9.50255e-34
Noxo1	NM_027988	3.45826	0	3.56138	0	3.35475	0	3.73979	0
S100a8	NM_013650	3.45402	0	3.81286	0	3.8141	0	2.56553	1.40268e-18
Il10	NM_010548	3.45395	2.11178e-31	2.52087	0	1.70944	3.42921e-13	1.3838	5.09375e-10
Tnc	AK048765	3.4523	1.52238e-18	2.09837	0.00266	3.33043	1.96182e-44	2.62484	1.68754e-27
Lcn2	NM_008491	3.45024	5.78597e-12	3.39119	1.43925e-18	2.96506	3.15239e-11	3.16372	1.65292e-15
E2f7	NM_178609	3.44514	0	3.05506	4.02781e-24	3.69922	1.05901e-20	2.67879	4.94153e-14
Cd8a	M12052	3.44017	1.79471e-19	1.39298	1e-05	1.12078	0.46694	1.15728	0.07868
Hells	NM_008234	3.43991	2.20315e-20	3.13581	2.05812e-39	3.45504	2.35425e-37	2.21614	4.05969e-10
Reg3g	NM_011260	3.4389	1.85387e-13	2.95127	4.8404e-15	3.16974	1.34259e-18	2.7336	2.45982e-11
Asf1b	NM_024184	3.43547	2.19965e-39	3.19237	0	2.94664	1.55897e-27	2.55445	1.4013e-45
Cdc45l	NM_009862	3.43285	1.81718e-29	3.29335	0	2.84112	0	1.88809	5e-05
Cd244	AK033178	3.43033	1.05628e-33	2.33007	4.61283e-24	2.9866	1.88943e-08	2.36045	1e-05
Cst7	NM_009977	3.42973	0	1.94256	1.00135e-29	1.67878	1.32178e-10	1.676	1.18312e-17
Cxcl16	NM_023158	3.42663	2.50902e-20	2.52189	0	1.6127	5.73217e-16	1.75254	3.80646e-15
A530064D06Rik	NM_178796	3.42457	1.95065e-27	2.31299	4.56106e-18	2.44187	2.26032e-22	2.3689	1.95639e-19
Pkib	NM_008863	3.42228	6.64173e-09	2.53668	0.00636	1.6432	0.03082	1.7982	0.00027
Speer4d	NM_025759	3.42163	0	2.82703	0	4.20714	3.11047e-23	2.96175	1.182e-41
Hsh2d	NM_197944	3.41161	0	1.82338	2.49705e-16	1.52594	1.32978e-10	1.86677	1.52324e-13
Ube1l	NM_023738	3.40614	0	2.87389	2.24208e-44	1.30143	4e-05	1.16545	0.01991
ENSMUST00000046911		3.4058	0	2.55695	6.94428e-11	1.47447	3.19793e-12	1.22468	0.22465
Speer5-ps1	AK005695	3.40244	0	2.67901	9.82193e-40	4.04778	1.08035e-23	2.5668	3.11264e-36
Xcr1	NM_011798	3.39987	1.99617e-18	3.60341	0	2.02558	4.09237e-18	2.2774	1.821e-06
1700049L16Rik	NM_175390	3.39177	2.11673e-19	3.48863	2.95105e-14	2.58087	5.42235e-29	2.23035	1.43738e-18
C2ta	NM_007575	3.38932	2.50832e-42	3.32961	0	1.45717	4e-05	1.83467	9.54517e-10
Pigr	NM_011082	3.38203	0	3.63856	9.43985e-41	3.28197	0	2.77012	0
4833427B12Rik	BC082565	3.37773	2.88532e-26	2.88854	1.5034e-26	2.84506	9.17772e-33	2.2225	3.26082e-42
Mad2l1	NM_019499	3.373	1.07901e-33	3.08679	4.97877e-39	2.70705	2.53327e-22	2.10723	5.2616e-24
Ccl5	NM_013653	3.37114	0	1.61162	1.1158e-15	1.03085	0.61247	1.32063	2.35546e-07
ENSMUST00000084861		3.36597	3.43538e-32	2.56895	3.72083e-09	1.86661	6.81182e-13	1.5031	1e-05
Gpr176	NM_201367	3.36594	1.02795e-29	4.2788	0	4.93161	0	4.5396	6.83806e-41
Ptpro	NM_011216	3.36513	2.71576e-07	2.20637	0.00013	1.10811	0.40061	1.72521	0.00039
2310016F22Rik	NM_173743	3.36434	2.54188e-22	3.39468	0	2.1491	6.7768e-15	1.15677	0.08296
Aadac	NM_023383	3.36214	3.35239e-16	6.17931	0	2.92211	3.18361e-18	2.83347	0
Apobec3	NM_030255	3.3604	0	2.35484	4.87251e-26	1.41365	2.93908e-08	1.72021	2.72003e-11
Ccne1	NM_007633	3.35754	1.19735e-26	2.55383	9.28016e-22	2.33546	6.87451e-11	1.98301	3.50162e-10
Brip1	NM_178309	3.35653	6.1156e-40	3.61738	0	2.59517	8.90396e-23	2.0843	3.65077e-26
Mpeg1	L20315	3.34363	5.87542e-37	2.14606	7.89018e-15	-1.01303	0.89919	1.26827	0.02812
Samhd1	NM_018851	3.3422	0	3.08424	0	1.12937	0.02597	1.02333	0.77651
Psme2b-ps	NM_011191	3.34149	9.92116e-10	3.13381	1.69249e-11	1.46938	1e-05	1.37774	0.00106
C1qc	NM_007574	3.33983	1.29458e-40	3.12499	0	2.03451	2.58516e-27	1.83779	1.61699e-14
5830432E09Rik	AK017962	3.33954	1.29468e-07	1.94671	6.30646e-16	1.8533	2.69276e-07	2.15966	2.8383e-10
Gyk	NM_008194	3.33603	7.06037e-17	2.75709	3.39412e-06	1.61987	0.00667	1.40859	0.05697
Upp1	NM_009477	3.33588	9.1163e-06	2.66177	9.89484e-10	1.24735	0.44111	1.34568	0.44969
Orc1l	NM_011015	3.33211	0	3.38936	3.14686e-32	2.93274	1.139e-08	2.75034	3.61555e-25
Raet1a	NM_009016	3.33059	6.28615e-24	4.08527	6.24555e-31	5.12558	0	4.22212	0
Rnf36	NM_080510	3.32516	3.8912e-29	3.11921	0	1.51753	2.31388e-07	1.31968	6.92772e-07
A030005K14Rik	NM_030005	3.32512	1.47174e-10	1.88863	0.0656	2.27518	4e-05	1.67354	0.05284
Cd69	XM_132882	3.3233	2.59462e-21	1.31455	0.02042	1.31687	0.04245	1.05488	0.33765
Plk4	NM_011495	3.31925	6.24283e-36	2.7746	2.75774e-24	2.54716	5.78322e-29	1.65663	1.35014e-10
Gas2l3	AK018456	3.31615	4.28962e-30	2.946	3.84162e-31	3.22151	1.10513e-32	2.22249	9.80122e-15
TC1479009		3.31531	0	2.30118	7.41667e-22	1.39555	8.63163e-06	1.40349	1.40209e-08
H2-Q10	BC042572	3.30176	3.89432e-33	3.02092	2.32782e-29	1.22195	0.00896	1.35941	0.00135
H2-T24	NM_008207	3.30108	5.67806e-42	2.84895	8.55161e-38	1.20409	0.10332	-1.00515	0.95901
5830483C08Rik	NM_177331	3.29413	5.59354e-35	2.98288	2.35694e-11	2.64233	1.61656e-08	2.23051	1.36705e-26
Il2rg	NM_013563	3.29133	7.82329e-39	2.02849	1.50475e-15	1.28123	8e-05	1.65927	2.21092e-13
Cd300lf	BC057864	3.28985	0	2.69144	0	2.29692	4.85543e-31	1.88343	3.16664e-28
Spon2	NM_133903	3.28065	0	1.5465	7.0513e-09	1.72136	5.78915e-13	1.34948	0.0001
Trim25	NM_009546	3.27716	6.41938e-29	1.65551	1.06636e-19	1.64413	3.79501e-11	1.28396	0.00345
Clec4n	NM_020001	3.2771	0	3.42897	0	3.40053	1.60553e-33	3.69538	4.56338e-30
Cdca2	NM_175384	3.27545	2.18717e-18	3.06843	2.77726e-28	3.30086	3.24422e-38	2.46181	5.98423e-29
5031410I06Rik	NM_207657	3.27392	3.98504e-07	2.02456	0.00572	3.66605	0	2.40036	2.20329e-07
Spcs3	AK048051	3.26519	0	2.4455	3.07965e-32	1.7971	3.91577e-26	1.65097	3.81218e-15
Ncr1	NM_010746	3.26466	0	3.07325	0	1.46113	1.07916e-06	1.78515	4.22995e-08
Gzmb	NM_013542	3.26127	1.09131e-22	2.30097	1.55958e-11	1.45091	2.33002e-06	1.19277	0.04184
Ncoa7	NM_172495	3.25888	1.47795e-41	1.91324	2.60648e-21	1.54456	2.94e-09	1.07444	0.43175
Tlr1	NM_030682	3.25678	1.4013e-45	2.15817	1.51809e-17	1.61952	1.40225e-10	2.23744	2.58379e-38
2810417H13Rik	NM_026515	3.24993	0	3.16138	0	2.75357	5.40867e-24	2.25084	1.84079e-15
Sap30	NM_021788	3.24762	0	1.78053	2.72416e-11	1.6878	3.69894e-08	1.13851	0.09939
Stfa2l1	NM_173869	3.24719	2.42922e-14	2.94094	4.02606e-10	3.03496	3.66223e-14	2.09328	5.66084e-09
9030425E11Rik	NM_133733	3.24491	1.31736e-20	3.38855	2.2748e-29	3.09193	7.65902e-37	2.94296	0
4921510J17Rik	BC050801	3.24472	4.61844e-07	1.16705	0.09346	1.2886	0.37396	1.97693	0.00015
5830484A20Rik	NM_175397	3.24442	0	2.1392	1.85699e-36	1.30538	4.03443e-06	1.15402	0.05565
Ube2t	NM_026024	3.24423	1.17669e-33	2.81925	0	2.92628	0	2.04863	5.7272e-19
C1r	NM_023143	3.24172	2.54776e-37	2.99698	3.85789e-31	2.13637	4.49098e-17	2.1852	2.28264e-09
Expi	NM_007969	3.24106	1.40538e-13	4.20279	0	4.70871	0	3.92111	0
Rab32	NM_026405	3.24003	0	2.44647	8.62026e-40	1.98559	2.26713e-27	2.07609	5.84465e-32
H2-Bl	NM_008199	3.23993	1.78929e-30	2.50078	1.8996e-13	1.06975	0.61749	1.16055	0.13281
B230219N05Rik	AK045665	3.23777	1.41041e-08	2.26864	0.0063	1.90592	0.02815	1.2663	0.33794
Gpr171	NM_173398	3.23691	1.57429e-30	2.18971	3.69234e-39	2.01067	4.32306e-24	1.87014	1.91494e-06
NAP061485-1		3.23392	1.79359e-40	2.22705	1.55864e-16	1.18567	0.01215	1.09203	0.24819
Klk1b5	NM_008456	3.2338	0	-1.07559	0.20577	1.3036	0.00121	1.27099	0.00265
4930467M19Rik	AK015524	3.23346	2.95497e-27	2.81078	0	2.47731	1.20656e-15	1.94817	2.02337e-08
Stfa1	NM_001001332	3.2326	1.04164e-25	3.1986	0	3.3306	0	2.08054	6.11883e-20
BC004022	BC004022	3.23062	1.15781e-17	2.15795	2.16209e-11	1.13807	0.35053	1.06496	0.31725
TC1479186		3.22676	2.67091e-11	2.25557	1.45933e-07	1.28393	0.02973	1.08833	0.49617
Luzp5	NM_133762	3.22644	0	2.73677	1.0767e-18	2.87085	6.33993e-30	2.17791	1.98945e-29
B430306N03Rik	NM_177083	3.22262	0	2.83298	1.68156e-44	2.31521	1.32881e-40	2.22648	4.27787e-24
Spbc24	NM_026282	3.21815	8.52173e-40	3.25454	3.21355e-37	2.9855	9.41285e-24	2.0368	1.40364e-20
Stat2	NM_019963	3.21374	0	3.17547	1.49401e-25	1.30047	0.09248	-1.17958	0.04913
Sp100-rs	XM_620661	3.21347	0	1.89352	1.98883e-14	1.19473	0.00068	1.06459	0.46287
Rrm2	NM_009104	3.21264	8.19045e-37	3.11059	7.51355e-36	3.14483	2.42059e-25	2.23137	2.37086e-20
9930023K05Rik	NM_172641	3.21178	8.40779e-45	2.6663	2.09636e-27	1.99986	1.33712e-07	1.72373	4.40489e-09
TC1532349		3.20964	3.00151e-30	3.00365	0	3.09002	7.70101e-28	2.65686	2.20373e-12
Ncf4	NM_008677	3.20837	5.78003e-36	2.38595	2.084e-18	2.04672	6.37799e-12	2.30023	6.59993e-29
Klk1b27	NM_020268	3.20672	0	-1.10322	0.36804	1.36072	0.00091	1.84488	1.61353e-19
Lrrc4	NM_138682	3.20462	2.83751e-09	1.3698	0.00812	1.39185	0.01129	-1.0974	0.35213
Acn9	AK016986	3.20252	0.00011	1.75829	1.89284e-09	1.61278	0.0705	1.21188	0.02616
3000004C01Rik	NM_197959	3.20246	1.79722e-33	3.54247	5.22039e-26	3.28828	1.83791e-13	2.79599	2.09226e-23
Apaf1	NM_009684	3.19905	4.13943e-29	2.19806	3.84413e-29	1.6057	3.25423e-10	1.35601	0.00052
4933413B09Rik	AK077091	3.19679	4.01055e-13	2.64113	8.57632e-09	2.00459	0.00494	1.9102	0.07479
Klrb1f	NM_153094	3.19464	5.0205e-18	2.70603	2.80552e-08	1.82113	0.00041	1.89145	7.31353e-06
2700099C18Rik	XM_619504	3.19235	1.2288e-14	2.89296	6.2242e-25	2.27138	7.48357e-09	1.87119	1.20888e-08
Parp11	NM_181402	3.1899	0	1.97699	2.09042e-20	1.18391	0.01301	1.09962	0.13658
Crtam	NM_019465	3.18855	2.50552e-42	2.00947	7.76032e-25	1.80907	1.1727e-17	1.69433	5.40186e-19
H2-K1	U47328	3.18446	7.08883e-16	2.68112	1.04943e-30	-1.00037	0.99727	1.07257	0.44022
Slfn2	NM_011408	3.18319	1.4013e-44	2.22055	9.35395e-41	1.62147	2.85285e-11	1.60136	7.06213e-10
0910001A06Rik	NM_144846	3.18139	0	2.47539	4.09191e-32	1.71177	8.75687e-13	1.46593	3e-05
Cks2	NM_025415	3.18063	6.07618e-15	2.66195	7.12655e-08	3.34027	9.99164e-13	2.27405	5.42313e-07
Dapp1	NM_011932	3.17993	5.78415e-33	2.09312	2.62528e-36	1.72358	6.16159e-22	1.51312	0.00031
Nmi	NM_019401	3.17202	9.80909e-45	2.09685	1.46732e-24	1.28856	6e-05	1.0739	0.36779
Ccnb2	NM_007630	3.17135	0	2.92018	9.80909e-44	3.55444	3.36312e-44	2.54605	5.30222e-33
Klrc3	NM_021378	3.16944	0	2.69803	7.57164e-10	1.47341	0.00515	1.23521	0.12804
LOC56628	NM_019909	3.16923	4.59768e-09	2.56704	0	-1.00387	0.96995	1.06914	0.53175
1700123I01Rik	AK007250	3.16496	7.00649e-45	3.10559	0	1.0129	0.9305	-1.04538	0.72338
Tlr2	NM_011905	3.15812	0	2.45904	0	2.49729	0	2.67264	0
Arhgap11a	NM_181416	3.15201	8.34406e-35	2.53459	2.21875e-26	2.44692	1.31958e-26	1.90714	3.21441e-11
Bcl2a1b	NM_007534	3.15173	0	3.17184	0	2.93762	0	2.82072	1.48277e-22
Pole	NM_011132	3.1488	4.49677e-42	2.7446	1.39686e-37	2.82501	0	2.40233	8.89684e-42
Sp100	NM_013673	3.14175	8.20147e-18	1.83061	4.7574e-29	1.16116	0.02644	1.1414	0.09327
1810054D07Rik	NM_027238	3.1414	0	2.3988	8.74326e-41	1.69276	9.41496e-07	1.55662	2.35232e-08
Timeless	NM_011589	3.13913	0	2.23598	2.14837e-32	2.18566	3.38797e-29	2.14508	2.24323e-29
Ccnf	NM_007634	3.13759	1.56126e-24	2.16502	3.10658e-08	2.28804	6.88076e-15	1.96451	5.60898e-22
ENSMUST00000077110		3.13495	1.02621e-18	2.63366	2.16723e-15	3.15206	2.6421e-15	2.15571	4.83648e-12
H2-M2	AY302216	3.13358	1.34718e-21	2.61877	0	1.0465	0.33276	1.08173	0.08918
Thex1	NM_026067	3.12894	2.88431e-29	1.89588	6.86941e-16	1.34207	0.00014	1.36189	4.86664e-06
BE447944	BE447944	3.12748	2.88695e-08	2.40922	9.50699e-37	1.26923	0.00025	1.3458	0.01562
Ankrd22	NM_024204	3.12511	5.04367e-11	2.25721	1.58573e-21	3.21098	1.17892e-18	2.88262	2.26334e-23
Syt12	NM_134164	3.11954	0	2.68016	1.06496e-39	3.1729	0	2.36396	0
Kif5c	NM_008449	3.11446	0	2.17093	2.97199e-26	1.52817	4.58009e-10	1.39413	1.3498e-08
Zwilch	NM_026507	3.10762	1.89411e-34	2.75592	0	2.76609	7.8318e-29	2.04228	4.22495e-23
Cdc20	NM_023223	3.09983	3.95276e-30	2.52562	2.98593e-25	3.21503	4.99225e-20	2.09139	4.7577e-21
LOC238896	XM_138861	3.09758	3.00696e-30	3.05466	1.19288e-14	3.1712	9.39892e-15	2.59738	3.09226e-07
Slc15a3	NM_023044	3.09626	1.857e-23	1.96205	8.59749e-15	1.64838	3.84369e-10	1.67521	5.05297e-10
Kntc2	NM_023294	3.09614	1.81612e-11	2.52751	4.51807e-19	1.55103	0.00433	1.4422	0.00035
Card15	NM_145857	3.09592	2.2229e-37	2.50431	1.32856e-34	1.68872	1.29732e-13	1.69226	3.15846e-07
1500032H18Rik	BC020137	3.09561	1.3639e-12	2.08036	6.66759e-18	1.81049	2.6423e-07	1.2878	0.00024
Evi2b	NM_146023	3.09325	2.02241e-18	2.23377	1.15147e-35	1.74372	6e-05	1.90326	5.97961e-08
Il4i1	NM_010215	3.09206	3.38944e-16	2.67087	0	3.16599	3.75136e-23	3.33136	3.68437e-24
Tmem106a	NM_144830	3.08935	2.8026e-45	2.21517	2.56726e-39	1.62476	5.60449e-19	1.52426	4.69502e-07
MGC73635	BC090402	3.08886	0	3.0163	0	3.45434	0	2.63924	1.1322e-34
Ppp1r14d	NM_028104	3.08772	0	2.6346	9.62692e-43	3.28773	8.79501e-37	2.12908	8.33286e-19
Eme1	NM_177752	3.08594	1.28233e-22	2.7644	5.28547e-13	3.06658	3.46837e-26	2.19175	1.21378e-08
Trim12	NM_023835	3.08203	8.36542e-22	1.91355	4.40205e-06	1.0178	0.89358	-1.08272	0.57771
Vav1	NM_011691	3.08094	1.56794e-32	2.0249	8.33241e-18	1.60463	3.74642e-16	1.90398	2.31597e-29
Oip5	AK045323	3.07548	3.84722e-26	2.56616	4.38177e-13	3.1947	8.69222e-17	2.3257	1.90176e-25
Trafd1	NM_172275	3.07179	1.22387e-22	1.7952	1.28e-12	-1.05166	0.39494	-1.04267	0.65768
TC1481003		3.06272	0	1.81006	4.51092e-09	2.08799	2.18493e-14	1.47963	2.66391e-07
Hcls1	NM_008225	3.06208	1.83857e-40	2.17484	1.39698e-16	1.73246	5.70841e-08	1.94848	2.6634e-30
Sfpi1	NM_011355	3.05922	7.54722e-12	2.01147	3.13911e-18	2.08018	6e-05	2.25805	1.89302e-22
AK017340	AK017340	3.05871	6.17366e-29	2.71856	8.40779e-44	3.06813	3.31091e-09	2.28069	6.05916e-08
Il18rap	NM_010553	3.05794	2.37341e-17	2.79358	0	1.95351	1.07598e-16	1.95964	6.90574e-32
2610036L11Rik	BC050071	3.05394	0	2.67951	0	2.66053	1.51213e-30	2.10412	2.10287e-24
NAP000023-001		3.05162	1.33891e-18	2.46208	1.96155e-20	1.01259	0.89088	1.1013	0.3079
ENSMUST00000040006		3.05056	8.486e-14	2.66851	2.34959e-28	-1.14551	0.46522	1.16881	0.33444
Tap2	NM_011530	3.05007	0	2.72323	1.67899e-17	-1.04167	0.80483	-1.01724	0.89226
H2-DMb1	NM_010387	3.04869	1.62911e-26	2.7191	5.34063e-37	1.41572	2.50354e-08	1.61974	2.41868e-13
Trim34	NM_030684	3.04562	0	1.80864	2.35293e-09	-1.00622	0.93259	-1.07769	0.45986
NAP027924-1		3.04507	9.2601e-11	2.7195	3.13489e-35	1.02739	0.73234	1.04468	0.58751
Tnfsf9	NM_009404	3.04278	0	1.91613	1.01693e-19	2.37286	3.26974e-13	2.51614	0
Espl1	NM_001014976	3.04143	8.25649e-14	2.13231	3.23609e-36	2.36378	3.44408e-29	2.26518	6.16571e-44
Gch1	NM_008102	3.04068	1.07845e-23	2.03294	5.97158e-13	2.52186	2.48689e-20	2.25525	3.80503e-14
Nmral1	NM_026393	3.04022	2.51036e-30	2.15564	2.09986e-21	1.95799	3.50465e-18	1.76284	2.20953e-25
D17H6S56E-5	NM_033075	3.03758	0	3.17964	1.2906e-42	2.56616	9.55047e-26	2.31067	3.27595e-35
Ptpn2	BC008269	3.03738	2.52234e-44	2.43633	1.02619e-16	2.38561	1.41298e-14	1.95695	2.77153e-21
Zdhhc21	NM_026647	3.03668	6.30393e-15	2.13374	1.12294e-20	1.81577	4e-05	1.3881	0.01953
D430006K04	AK084893	3.03304	2.58786e-10	2.3681	8.66405e-10	1.87746	0.00168	1.26951	0.02507
Mdm4	NM_008575	3.03026	0	1.95785	8.65112e-11	1.72611	1.7798e-18	1.55744	1.61731e-06
Ccdc109b	NM_025779	3.02776	0	2.70696	2.42154e-24	2.07836	2.54609e-23	1.91433	1.50407e-31
Il10ra	NM_008348	3.02132	2.81661e-43	1.98493	6.34364e-18	1.40082	9.5423e-07	1.80556	3.40306e-16
Nfkbie	NM_008690	3.01445	0	2.42753	1.78797e-33	2.3033	4.79634e-31	2.73512	8.49229e-20
Kif4	NM_008446	3.01187	1.4013e-45	2.28575	2.20545e-37	3.02735	1.6667e-38	2.15553	4.29187e-21
TC1500867		3.01058	9.20633e-21	2.06662	1.60682e-09	1.44639	7e-05	1.53275	3e-05
Gcg	NM_008100	3.0088	1.26293e-34	1.22711	0.0704	1.66851	0.00021	1.19039	0.29028
Hist1h2ai	NM_178182	3.00768	1.17627e-28	2.72741	2.0459e-43	4.17188	1.03381e-32	3.1045	9.34572e-22
Isgf3g	NM_008394	3.00759	0	3.49893	1.30867e-41	1.3452	1.49782e-07	1.24102	0.11347
Samsn1	NM_023380	3.00662	2.83469e-41	2.14323	5.60426e-14	2.50814	5.7828e-17	2.25157	1.89179e-26
1600014C10Rik	NM_028166	3.00383	1.32056e-33	1.7877	5.30397e-20	1.43881	7.51908e-08	1.25428	2e-05
Birc1b	NM_010872	3.00227	4.23671e-26	2.0787	4.15709e-12	1.97854	5.01099e-16	1.98366	2.19945e-10
Gla	NM_013463	3.0004	1.82975e-23	1.92182	4.13719e-12	2.12273	5.22125e-13	2.01722	3.11268e-11
Pld4	NM_178911	2.99917	3.0815e-26	1.99696	3.83908e-22	1.2886	3e-05	1.45407	3.07684e-09
Ly6c	D86232	2.9935	3.01303e-07	2.57253	4.12265e-10	1.29111	0.0018	1.33062	0.00252
Muc4	NM_080457	2.99212	4.86022e-21	2.53677	6.5861e-44	2.02418	4.93048e-29	1.88284	2.00031e-12
Tyms-ps	M30774	2.98907	9.16368e-17	2.63382	1.25295e-17	2.87541	1.9192e-33	2.45123	0
Ung2	AK053890	2.98741	5.52262e-38	2.62136	3.40723e-26	3.46143	3.47436e-28	2.15643	6.572e-14
LOC544917	XM_619068	2.98412	2.65614e-33	2.62072	3.87875e-21	3.07162	4.78361e-19	2.38782	0
Igf1	NM_010512	2.98281	0	2.04484	0	1.95663	1.08997e-36	1.79739	4.2039e-45
A530023O14Rik	NM_175648	2.98024	3.64338e-43	2.40536	2.69603e-23	2.47259	7.98853e-36	2.05911	1.00997e-36
Tyms	NM_021288	2.97929	1.88264e-15	2.65802	4.03658e-15	2.75943	9.27296e-26	2.32814	1.1598e-23
Hist1h2ab	NM_175660	2.97815	1.55176e-17	2.61326	5.60519e-45	2.50216	7.26909e-25	2.48264	3.63421e-15
Siglec1	NM_011426	2.97651	9.46802e-29	1.23363	0.0424	1.68139	2.32805e-07	1.13168	0.10836
Slc32a1	NM_009508	2.97538	3.86043e-32	2.71573	2e-05	2.18304	1.93885e-06	2.87566	4.69782e-29
Adora3	AK013534	2.97416	6.60697e-11	2.18354	6.73182e-15	2.0044	7.14699e-09	2.71107	3.38772e-17
Cyfip2	AK037974	2.97346	5.58611e-18	1.79586	0.0002	1.6105	0.00702	2.06162	3e-05
Pstpip2	NM_013831	2.97102	1.22597e-26	3.1616	9.73288e-14	1.70632	0.00304	2.02459	0.00146
Art2b	NM_019915	2.96648	5.02612e-10	1.20074	0.30044	1.30061	0.12563	1.36694	0.19007
Pnpt1	NM_027869	2.96643	3.56643e-13	1.60372	5.30372e-08	1.41896	0.0009	1.07638	0.32184
Daxx	NM_007829	2.96274	0	1.34386	3.38737e-06	1.11579	0.23077	-1.15448	0.12958
Mphosph1	XM_193936	2.96028	3.40487e-27	2.40335	5.16274e-31	3.01519	1.079e-43	2.23742	1.16115e-26
Nefh	NM_010904	2.95941	6.85651e-12	2.07255	7.20872e-08	1.48028	0.00144	1.83885	2.95629e-12
Glipr2	NM_027450	2.95781	0	2.48671	3.9724e-41	1.96269	5.19417e-19	1.92483	1.74125e-16
Il23r	NM_144548	2.95594	6.33841e-13	2.1096	3.96722e-13	2.35568	3.57338e-11	1.68384	0.01184
Tor3a	NM_023141	2.95531	0	1.35127	4.05499e-07	1.36216	4.53714e-08	-1.03864	0.49178
Pira3	NM_011090	2.95246	9.67557e-17	2.30253	2.58961e-33	2.03608	3.30722e-36	2.06723	1.26563e-13
Galnt5	NM_172855	2.94549	1.91978e-43	2.18118	3.09762e-25	2.16097	1.14674e-40	1.74203	0.00014
Gng12	NM_025278	2.94371	1.76846e-22	1.89046	1.0941e-07	1.79312	6.98618e-08	2.03669	4.82049e-09
Zc3h12a	NM_153159	2.94197	2.13276e-31	2.53954	4.67305e-34	3.03189	0	3.13189	0
Tnfrsf23	NM_024290	2.94132	3.44541e-09	1.62941	4e-05	1.99298	0.00846	1.41124	0.00011
H2-Q7	NM_010394	2.94086	5.66925e-09	2.51878	2.33061e-26	1.00024	0.99543	1.05323	0.29883
Tacc3	NM_011524	2.9349	0	2.66806	0	2.61791	1.4013e-44	2.02511	1.30787e-28
Adar	NM_019655	2.93321	0	1.9704	3.17863e-34	1.43187	7.00597e-06	1.15908	0.03982
Tk1	NM_009387	2.93287	2.84155e-19	2.7873	1.4013e-45	2.95952	3.50851e-26	2.76894	8.37813e-21
Psmb10	NM_013640	2.93277	8.89319e-12	2.77339	1.56957e-15	1.27601	0.00438	1.33116	1e-05
Rabl3	NM_026297	2.93164	3.10841e-12	1.87902	0.00048	1.22075	0.21036	1.14508	0.45149
9930013L23Rik	AK018112	2.92929	1.96268e-11	4.67631	0	3.12182	6.46266e-30	3.91509	0
1110007F12Rik	AK085154	2.92889	2.80148e-41	2.24486	8.68998e-21	1.29432	0.00244	1.09969	0.25257
Vnn1	NM_011704	2.92579	0	2.68102	1.33038e-33	2.25867	9.12321e-28	2.52336	3.65837e-41
Gzmd	NM_010372	2.92559	0.0001	2.5125	2.44874e-19	1.20724	0.03723	1.32115	0.06337
Cd300d	NM_134158	2.92555	1.99448e-18	2.17322	3.50036e-16	1.54461	8e-05	1.71447	2.11346e-12
Cenpi	NM_145924	2.91875	3.33478e-14	2.76892	9.6441e-20	3.78597	4.2333e-33	2.74069	0
Edem1	NM_138677	2.91853	4.09361e-21	2.14651	2.53517e-24	1.70548	8.45659e-19	1.5403	6.56047e-15
F10	NM_007972	2.90963	2.24007e-32	2.16409	3.72719e-40	2.60575	1.18993e-27	2.53722	1.16142e-19
A_51_P144143		2.90945	0	2.743	5.80085e-33	2.8416	0	2.75333	4.23227e-26
Stno	BC019206	2.90784	9.1873e-25	1.9858	1.90396e-19	2.13825	3.84136e-33	2.09625	1.44481e-10
BC056923	NM_173395	2.90344	7e-05	2.79224	0.00062	2.19885	3e-05	2.09399	2.73393e-07
Tnfaip6	NM_009398	2.90056	6.67126e-14	2.61657	2.05961e-29	2.68655	0	2.13111	2.4871e-07
Pi15	NM_053191	2.89503	3.6184e-25	1.92023	1.79677e-22	1.8594	7.61507e-07	1.26985	0.00041
Ccl19	NM_011888	2.89438	1.63962e-22	3.55055	1.05933e-28	2.61897	9.91773e-13	2.49666	4.15086e-30
Olfr741	NM_207133	2.89376	8.55999e-29	2.43478	1.0909e-30	2.66836	2.30434e-16	2.1124	6.42274e-18
Olfr433	NM_146717	2.89038	4.9732e-12	1.14005	0.0653	1.19635	0.01587	1.96973	6.57937e-07
H2-D1	NM_010380	2.88613	2.04595e-09	2.50315	0	1.0505	0.5591	1.09949	0.32921
Lilrb3	NM_011095	2.88585	0	2.21799	1.58436e-23	1.87944	2.22934e-12	1.84083	2.19658e-12
Pilrb	NM_133209	2.88205	1.20247e-18	2.41895	4.2573e-23	1.73714	1.44278e-08	1.75369	1.07061e-10
Pim1	AK047301	2.87881	1.37132e-19	2.14044	6e-05	1.72032	0.00464	1.38598	0.10754
Cp	NM_007752	2.87768	2.01101e-14	3.19402	0	2.74243	0	1.93035	2.74021e-19
4930518F03Rik	AK029735	2.87765	1.9037e-11	5.14652	0	7.31032	0	3.55194	3.48454e-21
TC1467970		2.87304	4.38764e-12	2.0208	4.88914e-06	1.12062	0.3909	1.13195	0.18421
Gm496	XM_146107	2.87255	1.01974e-07	2.22682	1.81064e-11	3.84267	0	2.95601	3.88869e-18
Lgals9	NM_010708	2.86768	6.52924e-13	1.73114	3.06363e-08	1.41045	0.0003	1.4038	0.00021
A030007L17Rik	NM_026637	2.86715	0	2.63716	2.97342e-41	1.20983	0.00257	1.22034	0.00932
H2-Q5	NM_010393	2.86448	5.41584e-09	2.50365	1.46659e-37	-1.00687	0.92048	1.05489	0.48782
Il21r	NM_021887	2.86084	0	1.76095	1.40851e-12	1.26989	0.00166	1.48384	6.44765e-07
Ticam2	NM_173394	2.85909	1.48747e-27	2.03506	1.36382e-16	1.44916	0.00171	2.02106	4.52799e-22
H2-DMb2	NM_010388	2.85546	1.66054e-41	2.51026	1.2432e-17	1.38426	0.00015	1.59447	1.03019e-07
Slco4a1	NM_148933	2.8525	0	2.49013	1.21913e-42	2.64266	0	2.91197	1.869e-34
A630038E17Rik	NM_172602	2.85032	9.68214e-18	1.64663	8e-05	1.21542	0.01393	2.10407	3.15118e-06
H2-DMa	NM_010386	2.84789	7.92079e-13	2.6365	2.82401e-23	1.35037	0.00436	1.689	3.09822e-08
Prg4	XM_355243	2.84728	7.14662e-43	2.43613	1.99152e-32	2.68936	2.94262e-32	1.51638	1.56671e-06
Bst1	NM_009763	2.84671	4.6315e-13	2.41197	3.34117e-13	1.47252	4e-05	1.69859	2.89049e-06
Clec4a3	AK014135	2.84458	2.21916e-17	2.28145	1.09648e-10	1.74155	0.0002	1.59538	2.86219e-15
Ass1	NM_007494	2.8375	7.69152e-18	2.04492	4.7002e-13	1.43017	0.00089	1.28743	0.01072
Kntc1	XM_132322	2.83591	0	2.7687	7.33636e-39	3.22667	1.68156e-44	2.4919	0
Tnfsf14	NM_019418	2.83059	2.79726e-18	2.80811	1.12702e-22	2.16527	9.55432e-16	2.29729	5.49322e-17
Skil	NM_011386	2.82177	0	1.95662	5.85856e-13	1.76031	1.03672e-19	1.80473	3.0335e-25
Amn	NM_033603	2.81949	1.81727e-16	1.85033	8.36564e-06	1.66601	3.26929e-06	2.03041	2.93927e-15
Itgb6	AK087003	2.81761	4.96734e-13	1.99735	4.38406e-10	1.8834	5.49108e-12	1.41238	4e-05
Mrgprg	NM_203492	2.81671	1.85424e-18	1.53827	2e-05	1.58627	8.24302e-07	1.33672	8.19762e-06
Nkg7	NM_024253	2.81655	1.65714e-30	2.04873	1.11918e-27	1.32592	0.00017	1.325	9.50382e-08
Serpina3n	NM_009252	2.81352	1.66183e-17	2.58712	8.58579e-27	2.40926	5.8502e-18	2.24472	1.56811e-18
Ptprc	NM_011210	2.80773	6.84371e-17	1.77321	9.48609e-10	1.53497	4e-05	1.86383	1.45854e-25
Ralgps1	NM_175211	2.8037	7.46044e-25	1.85794	3.54581e-21	1.74891	1.03519e-14	1.58476	9.5516e-10
Ung	NM_011677	2.79545	1.72644e-23	2.73963	1.28919e-43	2.50774	0	2.29325	1.80555e-29
Prdx5	NM_012021	2.79405	9.42352e-24	2.14999	2.20024e-20	1.34325	7.2005e-07	1.28665	0.00206
Mmp9	NM_013599	2.79274	2.9809e-17	2.79134	1.10119e-38	2.34915	9.79283e-25	2.14617	3.50935e-15
Col3a1	NM_009930	2.79051	1.03039e-16	1.77715	1.86489e-08	1.7116	1.74825e-18	1.47837	7.74343e-07
Hap1	NM_010404	2.78517	2.31273e-15	1.65933	3.33249e-07	1.48466	2e-05	1.19953	0.14149
A730090H04Rik	AK080562	2.78068	2.46295e-38	1.69536	0.00134	2.2087	6.79209e-14	1.37069	0.05164
Tgm1	NM_019984	2.78042	0	2.33417	3.71078e-41	2.94475	0	2.6457	0
Pole2	NM_011133	2.77802	1.22771e-16	2.10791	3.48758e-07	2.13689	8.9209e-06	1.74954	6.35119e-07
Ptgs2	NM_011198	2.77418	4.77843e-43	2.34309	3.23459e-27	2.4194	2.25609e-18	1.5308	1.06258e-08
Slc1a2	NM_011393	2.77337	2.04463e-07	1.63657	0.0016	1.68297	0.00695	1.52199	0.13772
Cflar	NM_009805	2.77274	0	2.0762	1.92134e-27	1.44946	9e-05	1.1097	0.20179
Ptpn6	NM_013545	2.76952	3.37057e-13	1.8207	1.45855e-15	1.44904	2e-05	1.78929	2.81175e-08
Xtrp3s1	NM_139142	2.76672	2.18717e-34	2.85457	1.09982e-29	2.4898	7.51966e-19	3.12687	3.88787e-25
LOC545812	XM_620262	2.76527	5.96666e-18	2.44276	4.55693e-10	1.73743	3.41518e-06	1.57911	7.28491e-14
Jph3	NM_020605	2.76383	9.20403e-11	1.64955	0.04652	1.62183	0.02704	1.68735	0.00433
Tmem56	NM_178936	2.76252	1.04976e-23	2.43647	2.77713e-34	2.05902	6.19661e-08	1.88053	2.35605e-12
Rgs16	NM_011267	2.76005	7.06548e-13	2.59509	0	3.6248	4.2229e-25	3.75174	1.79504e-37
Slc16a6	NM_134038	2.75836	2.29877e-17	2.19231	2.32238e-28	2.14042	1.73904e-19	2.4746	2.92647e-41
TC1514992		2.75832	1.25824e-06	2.46972	1.17573e-19	1.07596	0.28431	1.09106	0.09964
LOC381484	XM_355437	2.75412	0	2.05189	1.36585e-21	2.51	7.82432e-36	2.22352	2.9105e-42
Il2rb	NM_008368	2.75189	0	2.13784	1.96026e-14	1.38271	2.61447e-06	1.44437	6e-05
A_52_P771912		2.75166	7.23041e-06	2.92368	1.04903e-17	1.25785	0.0322	1.03612	0.76051
Serpinb12	NM_027971	2.74955	8.4949e-31	2.71904	5.36813e-31	2.89685	2.43842e-26	3.05285	0
Ripk3	NM_019955	2.74539	1.60751e-22	2.01949	1.25347e-10	1.73772	4.77552e-08	1.89701	6.51119e-06
Klrc1	NM_010652	2.745	1.8197e-23	2.23707	7.44603e-24	1.19976	0.18567	1.32272	0.00757
Pstpip1	NM_011193	2.745	5.68792e-19	1.87614	4.8005e-17	1.46915	8.6672e-07	1.69164	2.14116e-21
Cdt1	NM_026014	2.74359	2.33537e-09	2.08642	8.77857e-08	2.22743	7.04061e-13	2.34575	4.68927e-17
Gpr88	NM_022427	2.74332	1.04288e-32	2.29731	1.32266e-27	1.83915	6.58443e-16	1.53183	2.6171e-09
Ninj2	NM_016718	2.7429	7.22083e-15	1.8657	2.20102e-24	1.30359	0.00457	1.0922	0.26702
Oas1b	NM_011853	2.73985	1.27301e-23	1.49345	0.00041	1.15926	0.0619	-1.0104	0.90596
Atp8b4	XM_619811	2.73933	1.15215e-27	2.01685	2e-05	1.37603	0.00663	1.18343	0.01617
Soat2	NM_146064	2.73801	1e-05	3.59199	7.96914e-27	3.24259	1.27433e-07	2.75213	0.00014
Chaf1b	NM_028083	2.73335	4.6757e-15	1.84203	9.59615e-10	2.60109	6.02421e-23	1.82497	8.19701e-27
Col22a1	XM_193814	2.73156	2.52242e-17	2.43776	1.71679e-24	3.62884	1.89175e-43	2.88445	0
BC055324	NM_201364	2.72932	9.6585e-11	2.36784	8.24807e-10	2.69265	6.87495e-17	2.39608	1.3896e-25
Dpys	BC029718	2.72828	2.43895e-07	1.80473	2.91292e-08	4.6	5.54965e-27	3.80098	7.70399e-39
C3	NM_009778	2.72657	7.55798e-10	2.4867	1.25306e-09	2.46543	3.43749e-11	2.37492	2.84406e-13
NAP123578-1		2.72614	1.4013e-45	2.18128	4.73061e-32	1.04683	0.53568	-1.07014	0.59764
Asb13	NM_178283	2.72572	2.64693e-27	1.75539	1.82607e-14	1.30898	0.00012	1.10873	0.08773
Sdad1	NM_172713	2.72179	2.66908e-31	2.26603	6.58645e-35	1.88696	2.51842e-19	1.76933	1.4443e-21
Usp12	NM_011669	2.72074	1.77515e-09	1.68369	4.35604e-10	1.20191	0.13651	1.13383	0.24111
NAP123700-1		2.71809	4.13384e-22	2.37102	4.58688e-28	1.14905	0.01492	1.05518	0.46746
Gdap10	BC052902	2.71645	6.80499e-14	2.18899	4.90675e-10	-1.0369	0.72484	-1.28929	0.08906
4933430I17Rik	NM_177607	2.71634	2.36661e-12	1.89422	4.78732e-12	1.87529	2.20233e-12	1.54804	3.28003e-07
Bak1	NM_007523	2.71475	1.88438e-28	2.19526	6.4832e-21	1.51285	2.73295e-06	1.43566	5.9348e-08
Ifitm7	NM_028968	2.71272	1.87882e-11	2.32934	1.30199e-18	1.64714	3e-05	1.62623	3.28488e-06
Dna2l	NM_177372	2.71211	5.11178e-22	2.22871	9.51124e-07	1.33965	0.00212	1.37389	0.02313
Tapbp	NM_001025313	2.71107	1.92431e-18	2.46052	9.3064e-34	1.06808	0.45693	1.09663	0.11122
Lincr	NM_153408	2.70873	1.36356e-19	1.89819	1.79765e-13	1.22759	0.00148	1.61855	7.08614e-08
Gngt2	NM_023121	2.70805	3.30961e-14	1.70042	2.55768e-19	1.5637	3.66855e-08	1.69497	2.47953e-19
Fbxl5	NM_178729	2.7071	4.35498e-13	1.90125	2.1917e-06	1.51019	0.00085	1.46683	6e-05
Plek	NM_019549	2.706	0	2.26	9.80909e-45	2.00043	1.29994e-20	1.96294	1.50782e-25
4930553D19Rik	AK016101	2.70442	3.30963e-24	1.77266	1.26528e-07	2.87716	2.31659e-23	2.02274	1.1984e-11
Mxd1	NM_010751	2.70395	1.22905e-20	1.78197	2.33986e-18	1.5957	3.58508e-08	1.32425	0.00012
Pask	NM_080850	2.70193	8.48089e-17	2.53321	5.38572e-21	2.65097	0	1.97867	2.0009e-12
LOC544689	XM_618753	2.7004	1.3126e-18	1.36613	0.00994	1.13426	0.11791	-1.06478	0.3439
Nfam1	NM_028728	2.69585	7.99273e-35	2.41332	2.91237e-33	2.29316	1.89449e-24	2.12441	1.13552e-30
Col2a1	NM_031163	2.69547	0	1.81747	2.70469e-13	1.81921	8.30237e-33	1.55804	1.04679e-21
Tnfaip3	NM_009397	2.69111	0	2.3384	5.52718e-28	2.21489	2.16476e-29	2.34041	4.41613e-27
Pdia6	NM_027959	2.69027	2.93536e-08	1.85178	5.72655e-08	1.14065	0.01567	1.43063	0.00109
Cxcr6	NM_030712	2.68976	8.27087e-22	1.93157	1.34118e-17	2.20826	1.96593e-21	2.43055	9.628e-24
Rp2h	NM_133669	2.68864	9.43309e-30	2.02366	4.01415e-20	1.35626	3.95744e-07	1.25084	0.0178
Malt1	NM_172833	2.6866	1.98007e-28	1.77825	3.32777e-07	2.27125	7.98254e-15	2.37681	4.50419e-14
Casp7	NM_007611	2.68548	8.21508e-12	1.99913	1.99049e-17	1.09751	0.23564	1.10489	0.1184
Impa2	NM_053261	2.68173	1.75416e-22	2.1455	5.1104e-22	1.7829	3.34637e-14	1.80017	1.88101e-22
Plec1	BC024074	2.68044	2.19608e-24	2.29278	2.45143e-28	1.21229	0.00556	1.12995	0.02975
Dock10	AK034064	2.67868	1.32549e-15	1.74054	1.41691e-07	-1.04263	0.80636	1.35321	0.00151
Rrbp1	XM_622097	2.67752	2.72006e-41	2.16943	2.80303e-35	1.91308	3.41525e-30	1.72636	8.27529e-21
Cks1b	NM_016904	2.67503	2.32094e-18	2.71462	5.72501e-25	2.91179	0	2.04371	2.27592e-06
Ccdc18	NM_028481	2.67493	6.62831e-27	1.89812	2.04275e-07	3.93194	0	1.70973	3.21042e-07
Thbs1	NM_011580	2.67305	1.89554e-36	2.14255	9.30748e-26	1.63417	1.48516e-12	1.38237	1.52489e-09
Serpinb8	NM_011459	2.67072	3.9937e-43	2.05191	1.92702e-32	1.29226	4.40414e-06	1.12534	0.12664
Tubb6	NM_026473	2.66968	0	2.61204	4.06377e-44	2.64778	0	2.40603	1.70886e-32
Hnrpf	NM_133834	2.66501	2.45754e-15	1.84716	2.30262e-07	1.0019	0.974	1.1968	0.00125
Arg2	NM_009705	2.6619	0	2.65594	0	2.95374	0	1.9809	8.49276e-13
BC027057	NM_145976	2.66128	2.98428e-09	1.66228	2e-05	1.31171	0.00204	1.58334	1.48909e-07
Cd52	NM_013706	2.66082	5.23016e-13	1.97312	2.22358e-10	1.61932	1.96846e-10	1.79769	5.29912e-15
Apod	NM_007470	2.66079	1.75975e-21	-1.29441	0.00019	1.16121	0.06057	-1.12352	0.12749
Psme1	NM_011189	2.65993	1.3909e-15	2.32981	1.89509e-32	1.14678	0.00805	1.21504	0.0016
Cyba	NM_007806	2.65967	2.09595e-11	2.01036	5.19021e-12	1.72625	1.44371e-07	1.91779	1.36029e-07
E430002D04Rik	XM_620583	2.65801	2.40342e-22	2.02021	4.9761e-23	2.64802	6.5397e-35	2.42577	5.7569e-20
Tlr7	NM_133211	2.65755	5.23683e-39	1.27871	0.00057	1.54058	6.90443e-13	1.32447	3.82326e-06
Glrx	NM_053108	2.65274	1.18566e-21	2.07411	1.71541e-24	1.38139	0.00017	1.25608	2e-05
C1s	NM_144938	2.65264	0	2.43016	3.83616e-19	1.07072	0.48029	1.22954	0.01183
Trim21	NM_009277	2.65216	0	2.55054	3.81058e-29	1.27501	1e-05	1.08949	0.18849
LOC435271	XM_487182	2.65152	2.10992e-34	1.95511	2.08518e-28	1.84176	6.87345e-23	1.85818	6.46011e-10
Olfr56	NM_010999	2.65071	2.84639e-12	1.68166	0.00026	-1.06541	0.68135	-1.09406	0.50077
Itgam	AK040921	2.65042	2.71601e-16	2.40846	6.584e-41	1.80166	1.83528e-24	1.95302	2.95179e-13
Fasl	NM_010177	2.64866	1.11368e-37	2.03179	1.05557e-13	1.35999	0.00217	1.2448	0.00036
Etv6	NM_007961	2.64778	1.14483e-14	1.94683	1.34152e-11	1.61208	2.10331e-10	1.48684	5.26846e-13
Cd53	NM_007651	2.64317	1.70295e-12	2.1169	2.1452e-10	1.66149	0.00102	1.79393	4.82105e-23
Snag1	NM_130796	2.64253	0	1.83297	8.29588e-28	1.84602	2.78367e-25	1.62367	4.96624e-07
Aspn	AK042419	2.63865	2.16278e-11	2.63624	0.00016	2.96936	6.52426e-16	1.63583	0.00123
Fut2	NM_018876	2.63811	3.98705e-08	1.41095	0.07865	1.68185	0.01905	1.43636	9e-05
Dpy19l1	NM_172920	2.6377	2.10493e-17	1.74156	2.12276e-10	1.21083	0.01298	1.06318	0.41422
A830005F24Rik	NM_001002771	2.63694	0.00035	1.81625	0.00144	1.68568	0.00026	1.27742	0.01128
Apoc2	NM_009695	2.63686	1.70742e-21	1.64006	2.11614e-08	1.41744	2e-05	1.44332	4.43586e-07
Slamf9	NM_029612	2.63092	7.2096e-36	2.10849	1.14678e-22	1.70547	5.69387e-15	1.78293	5.55141e-13
Nt5c3	NM_026004	2.63025	0	1.2212	0.00233	1.35942	0.00014	1.00253	0.96401
Steap1	NM_027399	2.62927	0	2.54107	4.57762e-41	2.60913	2.80743e-10	1.70295	3.44086e-19
Cd48	NM_007649	2.6261	7.27956e-11	2.05081	5.79377e-07	1.62816	0.00528	1.9386	9.1539e-08
TC1544307		2.62463	3.42339e-25	2.09369	6.06863e-25	1.78928	1.39427e-21	1.70006	2.63537e-20
Csf2	NM_009969	2.62187	5.82625e-32	2.97093	0	3.3655	0	3.09944	8.46174e-36
Rfc5	BC089001	2.61893	1.86271e-24	1.99418	2.17638e-11	2.11666	1.20141e-26	1.87789	5.26913e-24
Itgal	NM_008400	2.61663	0	1.92228	3.31791e-32	1.30903	1.12637e-06	1.47283	2.9963e-13
Ptges	NM_022415	2.6149	2.88617e-31	1.9807	6.97373e-13	2.33104	9.91455e-19	2.25356	7.57478e-38
Tnfsf10	NM_009425	2.61448	9.33125e-42	2.35526	2.1132e-30	1.11014	0.13272	1.29841	1.69326e-06
Tubb3	NM_023279	2.61223	9.80909e-45	2.32057	0	1.2431	5.91412e-06	1.29728	3.82177e-08
Slc25a37	NM_030054	2.61028	1.15696e-14	1.64129	1.99684e-10	1.28701	0.02381	1.1722	0.1769
Dcamkl1	BC050903	2.60998	1.06919e-42	2.98803	3.65565e-16	2.63207	8.52012e-16	2.07627	1.11907e-18
Alox15	NM_009660	2.6069	4.30361e-18	2.53405	1.53702e-22	1.12045	0.27195	1.10194	0.20979
Gpr18	NM_182806	2.6068	1.5771e-28	1.412	7e-05	1.11295	0.14893	1.43854	0.0103
Cpne2	NM_153507	2.60462	6.44279e-18	1.73803	5.01262e-22	1.66459	1.34728e-14	1.60827	4.82415e-08
Mcoln2	NM_026656	2.60402	0	2.52291	5.87463e-17	2.92305	4.85214e-22	4.31013	3.29789e-28
Depdc1b	NM_178683	2.60254	2.26172e-18	2.34292	7.00649e-45	2.66457	2.98192e-40	1.81058	2.93515e-13
Fen1	NM_007999	2.59993	3.08382e-21	1.98103	1.16533e-28	1.60364	1.54304e-15	1.51828	3.43155e-13
Gsg2	NM_010353	2.59921	0	2.33802	4.67423e-20	1.89186	5.89761e-30	1.42502	1e-05
Cxcr3	NM_009910	2.59711	0	1.47626	2.25376e-08	1.0833	0.23323	1.45864	6.3879e-07
Ahrr	NM_009644	2.59569	5.27533e-06	1.72436	2.46279e-15	1.44322	0.02452	1.64708	2.11077e-11
Cd300a	NM_170758	2.59495	3.88943e-13	2.1969	2.67993e-15	1.74548	2.6904e-07	1.93276	1.06724e-20
1700029I01Rik	NM_027285	2.5934	8.53739e-24	2.03798	2.8458e-30	1.64966	1.19892e-18	1.35743	2.68765e-06
Arid5a	NM_145996	2.59192	3.35557e-38	1.84554	2.19581e-11	1.66384	2.27003e-18	1.91327	4.84824e-19
Tram1	NM_028173	2.59186	9.69581e-34	1.89872	1.36143e-09	1.37698	2e-05	1.21244	0.05583
Hyls1	BC035953	2.59022	1.18643e-10	2.1583	2.67427e-06	2.25797	6.55239e-09	1.43849	0.08282
Rasa4	BC057460	2.58335	0	1.51072	1.61522e-10	1.3209	7e-05	1.11954	0.08739
2310007D09Rik	BC068129	2.58286	4.73113e-13	2.04174	5.26129e-09	2.30094	5.03829e-16	1.96535	7.69577e-22
Ptger4	NM_008965	2.58167	2.2308e-09	2.03833	2.68683e-18	1.88028	3.56881e-09	1.58153	1e-05
Cryba4	NM_021351	2.58115	4.6743e-11	1.48378	1.96512e-06	1.22294	0.02461	1.23716	0.00142
Zmynd15	NM_001029929	2.57947	5.65086e-10	2.0057	1.87853e-07	1.79264	4.10582e-06	1.86773	2.83517e-11
F3	NM_010171	2.57943	5.07856e-40	1.83162	2.42462e-08	1.77062	2.59967e-18	1.4045	5e-05
Kpna4	NM_008467	2.57727	3.09799e-14	2.02543	2.3245e-14	1.57282	7.85271e-08	1.5528	6.44167e-07
Serpinb2	NM_011111	2.57677	1.09465e-31	2.39782	0.00016	3.00196	1.88886e-25	1.58922	0.00321
Dhfr	L26316	2.57675	1.01709e-19	2.09303	1.45303e-19	2.37539	4.206e-41	1.82674	1.75988e-13
AI481105	XM_130703	2.57659	4.42626e-13	1.5326	6.39939e-16	-1.00463	0.93907	-1.09584	0.16901
Kynu	NM_027552	2.57537	2.72543e-11	2.4328	2.8026e-45	1.54744	5.17495e-14	1.56426	4.02165e-08
Chtf18	NM_145409	2.57512	5.13476e-38	2.19024	3.08927e-40	2.04231	8.64653e-27	1.93221	1.06257e-16
Klra20	NM_053150	2.57396	1.44753e-17	1.88974	2.58775e-06	1.05246	0.49352	1.23253	0.00055
Traip	NM_011634	2.57286	8.10622e-15	2.37242	3.27785e-18	2.42204	7.72431e-17	1.99308	2.99412e-09
NAP025806-1		2.57046	0	1.92731	4.47649e-20	1.45428	4.75269e-08	1.33527	0.00205
Ltf	NM_008522	2.57034	1.03973e-31	2.81306	0	1.89011	7.49969e-20	1.67696	3.13979e-10
Kif23	NM_024245	2.56868	7.68617e-17	2.29947	4.4303e-17	2.24651	2.83298e-20	1.8647	3.10365e-13
Bcl3	NM_033601	2.56816	2.29125e-10	2.37764	1.84423e-10	2.54998	1.27801e-09	2.73798	1.06484e-16
Gzma	NM_010370	2.56734	3.01736e-32	2.13648	1.18749e-30	1.11374	0.0392	1.31009	0.00018
Has2	NM_008216	2.56628	1.11169e-13	2.05908	4.6095e-13	4.41266	0	2.69677	5.26122e-12
Mmp14	NM_008608	2.56511	5.33759e-26	1.69105	0.00117	1.67793	0.00019	1.58168	7.83019e-07
Dnmt3l	NM_019448	2.56462	9.62287e-33	2.36259	3.91053e-23	2.27127	6.9311e-14	2.33855	8.99052e-27
Cdc6	NM_011799	2.56112	1.65188e-26	2.19493	4.59622e-07	2.30519	1.81172e-15	2.06423	3.15499e-16
Mcm5	NM_008566	2.55904	1.64511e-17	2.25386	8.2814e-29	2.32564	4.42955e-16	2.12956	1.09615e-09
Serpinb9	NM_009256	2.55772	0	2.01163	3.0297e-29	1.14682	0.02071	-1.02629	0.81264
ENSMUST00000088886		2.55688	1.35605e-18	1.83187	3.79237e-15	1.52887	4.54638e-15	1.29562	3.04714e-06
40969	NM_175188	2.55496	3.33985e-40	1.63775	6.62247e-16	1.55274	1.13397e-11	1.55703	1.41899e-11
Rab11fip5	NM_001003955	2.5517	2.22069e-14	2.31858	1.35537e-15	2.3803	1.54439e-14	2.00703	3.18203e-32
Marcksl1	NM_010807	2.54955	5.72422e-23	1.89727	1.62033e-22	2.63339	3.33847e-16	1.97513	1.06265e-27
Tcrg-C	X03802	2.5487	0.00034	1.66135	2.30026e-06	1.57007	0.0001	1.17089	0.02582
Slfn5	NM_183201	2.54726	1.62309e-33	1.44869	0.01546	-1.00715	0.96366	-1.79264	1.65301e-22
Gm8	XM_110743	2.54696	4.915e-22	1.63513	8.29946e-08	1.30815	0.0175	1.32819	7e-05
Gfpt1	NM_013528	2.54615	3.51223e-26	1.80873	8.92745e-08	1.27949	0.00012	1.36584	1.76322e-07
TC1537769		2.5432	4.73994e-32	1.76922	3.56935e-17	1.53518	2.27143e-13	1.33195	0.0015
Sgk3	NM_133220	2.54281	0	1.78407	3.921e-08	1.33174	0.0156	1.11878	0.02675
Sh3bp2	NM_011893	2.54261	4.38382e-36	1.74715	0.00044	1.26452	0.13553	1.53474	2e-05
Tlr8	NM_133212	2.53951	8.07822e-19	1.74385	1.21279e-08	1.07143	0.69727	1.58003	1.3314e-07
Tpd52	NM_009412	2.53908	5.84725e-31	1.91283	4.98134e-28	1.57747	1.59084e-08	1.47475	1.53098e-07
Klk1	NM_010639	2.53535	3.09443e-31	1.0357	0.68042	1.3803	0.00043	1.37618	1.82588e-06
Lman1	AK011495	2.53505	8.63646e-27	1.915	7.38345e-14	1.68087	6.15456e-07	1.49155	6.87125e-08
Tank	NM_011529	2.53475	2.00284e-33	2.00923	1.79084e-11	1.51767	1e-05	1.71226	2e-05
Mmp12	NM_008605	2.53418	3.4359e-21	4.82008	8.29952e-33	5.07922	0	4.88898	0
Zc3hav1	NM_028864	2.53372	2.60169e-13	1.67519	1.36206e-06	1.43296	0.00039	1.36142	4e-05
NAP014889-001		2.53355	0.00028	2.72918	1.82064e-18	3.08962	0	2.68571	1.19366e-37
Basp1	NM_027395	2.53053	0	1.75647	2e-05	2.12617	3.53976e-24	1.98355	2.1569e-20
Klra18	NM_053153	2.52974	8.33703e-41	2.16899	1.49603e-23	-1.06174	0.53497	1.33561	0.03531
Pik3ap1	NM_031376	2.52939	1.4425e-19	1.20185	0.00477	1.0716	0.24649	1.26976	6.87404e-06
Clnk	NM_013748	2.52928	3.18447e-15	1.79642	3.33387e-14	1.09032	0.19764	1.11895	0.24376
Klre1	NM_153590	2.52772	2.02527e-15	2.0052	6.20362e-13	1.13647	0.3106	1.37861	0.00255
Tnfsf8	NM_009403	2.52632	4.83095e-25	1.12779	0.15827	1.35322	0.00738	1.44955	3.55915e-07
Ceacam10	NM_007675	2.5224	0.00011	3.0963	1.02261e-25	3.17168	5.51055e-38	2.8354	1.57746e-24
Sypl	AK035670	2.52232	1.53569e-17	2.19279	6.24806e-37	1.84532	5.70027e-09	1.74768	0.00022
Tapbpl	NM_145391	2.51967	4.64838e-16	2.28575	2.39043e-24	1.09358	0.16483	1.15402	0.00557
Rnaset2	AK015947	2.51938	5.58597e-37	2.10939	5.96894e-12	1.5158	8e-05	1.52729	1e-05
Snap23	NM_009222	2.51846	2.15263e-40	1.9777	3.32992e-16	1.24907	3e-05	1.34015	2.32549e-07
Cdk2	NM_183417	2.51714	1.04349e-06	2.34233	0.00115	1.3016	0.05004	1.38552	0.02054
2810442I21Rik	XM_488587	2.51168	3.25135e-15	1.79601	3.59202e-09	2.12084	6.34924e-34	1.84439	1.29411e-13
Rap1b	M79314	2.51142	7.89589e-26	1.75506	4.6698e-16	1.13321	0.16896	1.23085	0.08316
Hrasls3	NM_139269	2.51109	3.38087e-12	2.14556	2.88432e-09	-1.09085	0.47316	-1.23876	0.26848
Cd160	NM_018767	2.50679	1.42135e-07	2.06624	0.00017	1.41413	0.13847	1.25174	0.13711
Ffar2	NM_146187	2.50534	2.31666e-21	2.68748	1.49354e-33	2.35163	9.65719e-41	2.67327	6.10345e-36
Eif4a1	NM_144958	2.50515	3.82663e-32	2.00254	8.40513e-06	1.23096	0.02953	1.31496	0.05808
Capza1	NM_009797	2.50281	8.54407e-18	1.84778	2.81548e-16	1.1501	0.26043	1.10639	0.10515
2410004F06Rik	NM_028034	2.50271	4e-05	1.37798	0.00292	1.64483	0.00138	1.25183	0.0154
Cd40	NM_170701	2.4963	4.81486e-27	1.44855	1.81993e-09	1.15553	0.03623	1.15942	0.00034
Arl5c	NM_207231	2.4947	1.04021e-28	1.30954	4.77237e-07	1.18255	0.00202	1.21799	0.00484
Vps53	AK008026	2.49243	5.64101e-19	1.98978	1.82855e-15	1.62994	0.00028	1.71571	0.00017
Zfhx1b	AK084311	2.49218	3.85045e-07	1.62659	2.34824e-08	1.34836	0.00157	1.10251	0.22838
Plk1	NM_011121	2.49199	3.43712e-19	2.23445	1.17039e-15	2.22929	2.30195e-18	1.95421	1.15494e-10
Tmem54	NM_025452	2.4892	9.14766e-15	1.92546	3.58472e-09	2.74112	1.38206e-38	1.97932	1.45648e-09
Aldh18a1	NM_019698	2.48775	1.80246e-15	1.95652	3.47262e-12	1.70943	9.42402e-10	1.77739	1.59923e-08
AK082805	AK082805	2.48769	1.06402e-26	1.47662	2.45982e-07	1.81254	3.10114e-11	1.78018	2.09449e-18
Ly6a	NM_010738	2.48676	8.32423e-06	2.40615	1.00848e-10	1.30597	0.11849	1.30331	0.0566
Klrg1	NM_016970	2.48399	6.11319e-28	1.97595	7.18728e-09	1.53491	0.00579	1.63775	7.01843e-06
Tcrg	K02899	2.48329	3.12886e-28	1.66457	4.25297e-13	1.47653	0.00973	1.47878	4.66139e-06
Nfkbiz	NM_030612	2.48239	1.5004e-37	2.89438	0	2.89821	2.20126e-37	2.45317	8.64601e-43
A_52_P981179		2.48218	1.35331e-22	1.75122	3.19303e-09	1.94403	7.51894e-08	1.15244	0.25414
Kcnn4	NM_008433	2.48176	1.84629e-33	1.7778	5.51003e-13	1.77028	4.00807e-09	2.04056	2.7978e-14
A530088I07Rik	AK080244	2.4801	2.46648e-32	1.84367	4.48889e-29	1.31624	0.00166	1.56445	3.97668e-14
Ldhc	NM_013580	2.47878	2e-05	2.05296	0.00013	1.84351	1.01228e-10	1.57669	2e-05
P2ry12	NM_027571	2.4778	5.45085e-29	2.30008	2.9999e-09	2.37387	6.37942e-17	1.77653	3.50353e-18
6330578E17Rik	BC002137	2.47746	5.29374e-12	1.96317	2.62711e-07	1.34359	0.00941	1.36371	0.01545
Serpina3c	NM_008458	2.4764	1.16041e-28	2.45201	6.88495e-21	2.17778	7.62498e-18	1.65634	7.79945e-14
Ctsb	NM_007798	2.47131	5.98954e-22	1.75323	1.25808e-07	1.85934	2.2722e-14	1.71139	1.58118e-07
B4galt5	NM_019835	2.47114	1.20114e-14	1.38396	0.17322	1.5902	9e-05	1.37466	0.07819
Gpr162	NM_013533	2.47054	4.38409e-16	1.01747	0.83428	1.18065	0.08802	1.25347	7e-05
9130017N09Rik	NM_030218	2.46764	8.79902e-11	1.64246	1.37949e-15	1.25958	0.00184	1.14579	0.09199
H2-D4	NM_008200	2.46264	2.06242e-06	1.9859	2.30761e-18	1.00272	0.96219	1.10527	0.1062
Lpxn	NM_134152	2.46163	2.61031e-15	1.62575	9.44367e-08	1.5661	1.1015e-14	1.57706	1.78761e-06
2810022L02Rik	NM_144882	2.46078	6.76205e-21	1.53967	4.08138e-09	1.27557	0.00127	1.16416	0.1382
Il13ra1	NM_133990	2.46077	2.2621e-20	2.19034	9.44517e-14	2.14162	4.23514e-19	1.50855	0.00093
Bean	XM_486154	2.46066	1.73144e-41	1.8123	1.21267e-21	1.89936	2.23606e-09	1.64948	1.42102e-18
Sell	NM_011346	2.4594	6.37972e-27	1.53062	1.16935e-10	1.26496	3e-05	1.42327	4.13781e-06
LOC433225	XM_484782	2.45793	0	1.89794	1e-05	1.15865	0.13697	1.36296	0.00438
Il24	NM_053095	2.45785	7.59433e-07	1.28576	0.0431	1.11986	0.56411	1.0689	0.50216
NAP103337-1		2.45723	3.41865e-23	1.8135	0.00014	1.08485	0.55218	-1.05013	0.70185
H2-Q1	NM_010390	2.4569	4.90114e-10	2.09598	6.92845e-37	-1.02378	0.69289	1.03232	0.54773
4632434I11Rik	BC066148	2.45559	1.0253e-12	1.92259	1.56733e-17	2.5937	2.41194e-08	1.77585	5.17051e-15
NAP028872-1		2.45507	5.2371e-20	1.78535	3.27897e-15	1.42594	3.47544e-08	1.189	0.00579
Asb4	NM_023048	2.4549	1.05932e-16	1.9295	1.00239e-14	1.8755	2.25373e-10	1.74745	9.89098e-25
2410146L05Rik	NM_026480	2.45411	1.20306e-21	1.97272	6.2948e-07	1.42792	0.00665	1.15343	0.26027
Ykt6	NM_019661	2.45375	2.53454e-40	1.90556	4.76522e-25	1.71003	3.08607e-10	1.4707	3.08892e-10
Tyrobp	NM_011662	2.45374	4.45596e-12	2.13155	1.37624e-10	1.88745	7.58496e-09	2.15557	7.80423e-06
Tgif	NM_009372	2.45224	8.16389e-21	1.78674	5.43661e-26	1.29866	1.55856e-06	1.47051	2.79136e-12
NAP057030-1		2.45013	1.09557e-17	1.86172	3.26988e-17	1.53792	1.61385e-07	1.58508	8.29614e-11
Arts1	NM_030711	2.44948	4.59597e-26	2.23501	2.25662e-36	1.29354	0.00042	1.29136	1.22746e-06
NAP058998-1		2.449	4.52167e-15	2.19796	6.78777e-12	1.21837	0.00307	1.24201	0.00017
Csf1	NM_007778	2.44887	1.02575e-42	2.34694	5.15678e-43	2.07262	1.75473e-36	2.48021	5.4322e-35
2610036A22Rik	AK011687	2.44716	6.21045e-21	1.77321	6.18565e-16	1.47995	3.46472e-06	1.28346	2.10848e-06
2010005H15Rik	NM_029733	2.44364	3.30355e-17	1.85722	1.71136e-19	1.49783	2.28917e-11	1.4764	1.75173e-07
Ermap	NM_013848	2.44339	4.93326e-08	1.01019	0.96172	1.17071	0.24524	-1.04175	0.76298
Serpinb10	NM_198028	2.44044	2.52234e-42	2.18961	1.27103e-20	1.4381	0.00012	1.38678	9.89561e-07
Dfna5h	NM_018769	2.44001	2.80892e-07	2.15921	1.83134e-08	2.71316	9.5623e-25	2.3275	6.38994e-16
Cenpl	BC060191	2.43968	6.54798e-33	2.03399	6.59499e-16	1.7413	2.19504e-17	1.4828	0.00063
Arl11	NM_177337	2.43853	6.89969e-22	1.89984	1.08472e-14	1.57837	7.64151e-07	1.70469	5.61983e-19
Mcm2	NM_008564	2.43479	0	2.03625	5.18384e-22	2.09359	2.64595e-21	1.97307	1.8507e-26
Prg2	NM_008920	2.4332	3.18374e-12	2.07874	9.81098e-18	1.65615	7.09342e-10	1.05261	0.4229
TC1519807		2.43208	2.74688e-17	2.09922	1.45703e-22	2.107	1.78407e-16	2.36358	2.24748e-21
Selp	NM_011347	2.43152	3.52368e-25	2.00804	8.65953e-15	2.63911	1.02932e-31	2.56268	7.06941e-26
2610510J17Rik	NM_028131	2.43024	7.2834e-22	2.37399	1.1814e-15	2.17321	3.50776e-11	2.01574	1.01467e-11
Dusp2	NM_010090	2.42933	3.72387e-33	1.29048	7.21917e-06	1.4412	8.72968e-12	1.93728	4e-05
Atad2	NM_027435	2.42826	4.93077e-32	2.30589	1.52185e-09	1.9207	3e-05	1.6582	1.00121e-10
Ikbke	NM_019777	2.42035	3.04591e-14	1.62362	1.1865e-10	1.41164	5e-05	1.34721	1.24538e-07
Syt15	NM_181529	2.41814	7.25569e-35	1.62948	5.2293e-09	1.29641	0.00317	1.51829	2.64608e-08
Gm905	NM_001025606	2.41764	2.46747e-23	1.67651	3.75829e-10	1.47116	0.00163	1.24404	0.03211
2410014A08Rik	NM_175403	2.41756	4.44465e-27	2.01718	6.28005e-24	1.75999	9.48708e-17	1.57843	6.72068e-08
Tuba6	AK013029	2.41714	6.69798e-07	2.02739	9.75958e-07	2.19888	2.31191e-07	1.70456	3.69326e-07
Hrmt1l2	AK077046	2.41514	2.43855e-09	1.81779	3.32356e-15	1.88553	9.43096e-07	1.76622	7.76828e-06
Litaf	NM_019980	2.4134	6.35952e-18	2.07269	6.0192e-19	1.91919	1.24769e-12	1.87727	2.5458e-10
LOC433377	XM_484937	2.41255	3.51837e-08	1.33066	0.00066	1.12898	0.66885	1.17892	0.14645
AK005018	AK005018	2.40596	9.16055e-16	1.96766	1.0238e-25	1.15975	0.00871	1.39696	1.78012e-06
Tpmt	NM_016785	2.40359	2.04613e-28	2.43165	1.22175e-29	1.59862	1.81748e-08	1.11996	0.11059
Scd3	NM_024450	2.40338	1.87476e-27	1.77083	1.54783e-10	1.43275	0.01621	1.50912	8.11116e-09
Myo1f	NM_053214	2.40219	6.12002e-20	1.9186	1.06926e-19	1.42818	1.71279e-11	1.68501	2.30543e-18
Plekhq1	NM_153119	2.40153	1.69276e-11	1.58392	0.00639	1.27615	0.19954	1.58841	1e-05
AK013903	AK013903	2.4015	1.30998e-18	1.64474	1.97345e-06	1.49213	4.43264e-07	1.54476	8e-05
Klra3	NM_010648	2.40127	1.91183e-08	1.77243	4e-05	1.00734	0.9495	1.10917	0.24525
Tgfbr1	NM_009370	2.39998	9.66015e-09	1.55051	0.00404	1.19624	0.1635	1.40224	8e-05
Nnmt	NM_010924	2.39792	1.63272e-29	2.13899	1.09849e-28	1.98167	4.22522e-30	1.78499	4.67286e-10
Tmco4	NM_029857	2.39669	9.51156e-30	1.44998	4.21874e-07	1.18381	0.24418	1.06435	0.5469
Ogfr	NM_031373	2.39623	1.12452e-12	1.52094	0.03689	1.04339	0.86124	-1.02505	0.89819
Nat13	NM_028108	2.3952	9.91185e-34	1.92156	1.46937e-23	1.62844	2.88719e-18	1.52097	2.04873e-08
B3gnt3	NM_028189	2.39287	3.15257e-18	1.67474	1e-05	1.02355	0.90106	-1.14871	0.04308
Clcn5	NM_016691	2.39235	1.70479e-31	1.85132	1.1971e-09	1.68963	3.2905e-14	1.92245	3.05179e-24
Gfi1	NM_010278	2.3907	2.23594e-16	1.61562	2.09804e-12	1.51626	1.28037e-09	1.79492	5.36462e-20
BB206048	BB206048	2.39032	7.80211e-38	1.46623	1.51347e-09	1.11516	0.09521	-1.42341	0.00013
Ggtla1	NM_011820	2.38941	8.51193e-12	1.76214	1.62528e-07	1.19129	0.00791	1.31924	0.00758
4632417K18Rik	NM_026640	2.38775	8.12753e-43	2.01341	6.62215e-27	1.83374	1.6412e-25	1.98905	2.14203e-25
Klra6	NM_008464	2.38694	2.41316e-37	1.78347	1.79458e-09	-1.163	0.1512	1.14044	0.0498
Pdss1	NM_019501	2.38514	2.51619e-17	2.18212	1.67199e-16	1.68443	2.5056e-07	1.44466	2.54606e-10
Rfc3	XM_132528	2.38271	2.55811e-20	1.73398	4.5841e-11	1.631	1e-05	1.58141	2.94723e-13
TC1494175		2.38168	1.77096e-41	1.78026	1.4441e-08	1.40229	4.07877e-08	1.37203	5e-05
Inpp1	NM_008384	2.38088	1.74057e-13	1.36715	0.01261	-1.13026	0.23089	-1.01084	0.90684
Myo1g	NM_178440	2.38025	2.13492e-21	1.7374	1.71265e-10	1.36307	0.00477	1.8111	1.33839e-23
Bid	NM_007544	2.37971	5.08607e-13	2.12193	2.22776e-09	1.45314	0.01298	1.35435	0.00259
Pml	NM_008884	2.37971	8.16725e-22	1.4742	1.43183e-08	1.23087	0.00536	1.20801	0.02373
Pycr1	NM_144795	2.37874	4.33275e-07	2.01481	3.5648e-10	1.75647	1.76044e-10	1.41391	0.00428
Has3	NM_008217	2.3781	6.71976e-09	1.98852	0.00135	2.76626	1e-05	2.82906	1.29101e-08
H2-Eb1	NM_010382	2.37664	3.85149e-15	2.04079	2.56821e-34	1.20926	0.00124	1.55549	3.07818e-13
E130306D19Rik	BC080700	2.37601	6.23217e-17	2.12842	6.83646e-15	2.44005	0	1.92056	4.85616e-26
LOC544730	XM_282933	2.37502	4.84625e-41	1.93016	1.93451e-19	1.40373	1e-05	1.16288	0.10154
Nek2	NM_010892	2.37441	1.47084e-35	2.06393	8.717e-26	2.14214	1.70219e-31	1.56511	6.14744e-15
Nckap1l	NM_153505	2.37413	5.71946e-14	1.72093	2.00074e-08	1.61557	5.11638e-07	2.08811	2.33452e-30
Sart2	NM_172508	2.37257	8.31204e-36	2.06135	3.47594e-22	1.22994	9e-05	1.14943	0.0299
Rsbn1l	AK040310	2.36986	1.35591e-14	1.48234	2.27035e-08	1.09683	0.15663	-1.00031	0.99623
Clec4a2	NM_011999	2.36961	0	2.47184	0	2.50663	3.0408e-16	2.67535	0
Abtb2	NM_178890	2.36844	4.40119e-21	1.56162	3.41163e-15	1.65603	3.23806e-11	1.51292	8.47925e-07
Slc28a2	NM_172980	2.36771	3.305e-16	1.28782	5.22708e-06	1.02297	0.71913	1.22661	0.00013
Nppb	NM_008726	2.36766	1.31098e-11	1.3009	0.04988	-1.47591	0.00316	-2.20454	6.67158e-16
Mllt1	NM_022328	2.3675	6.79031e-29	1.64438	4.90823e-08	1.45675	6e-05	1.27905	0.01209
Pvr	AK014446	2.36464	6.26613e-07	1.92966	4.24553e-13	1.4514	0.00045	1.21427	0.01694
Rbl1	NM_011249	2.36304	8.93073e-21	2.06766	1.43298e-08	1.51797	0.00023	1.33716	0.00039
Ube2l3	NM_009456	2.36304	3.45341e-14	1.78874	3.71212e-18	1.51634	3e-05	1.51088	1e-05
Stfa3	NM_025288	2.36294	0.00027	2.74311	2.76449e-19	3.55126	2.94624e-18	2.60616	4.00566e-30
Camp	NM_009921	2.3588	7.80749e-13	1.93256	8.65787e-08	-1.06779	0.63279	1.23047	0.09651
LOC435145	XM_487043	2.35699	9.00493e-19	1.54245	2.0406e-09	2.21478	1.77101e-17	1.61413	1.18104e-06
NAP065340-1		2.35192	5.96905e-09	1.58637	4.78901e-07	1.49847	4.29557e-10	1.48004	1.10454e-08
1810009K13Rik	NM_025462	2.35146	5.734e-25	1.7569	2.12084e-20	1.49197	3.37995e-08	1.62539	1.21158e-16
Tnfaip2	NM_009396	2.35128	1.08259e-18	2.47771	1.35292e-27	1.59222	5.93007e-11	1.78003	2.30052e-11
Nuak2	NM_028778	2.34835	6.18533e-42	2.12498	8.48862e-22	1.22173	0.00216	1.3318	0.00111
D17Ertd441e	NM_198937	2.34804	5.07572e-32	2.1659	9.26823e-38	2.09011	1.74683e-17	1.63122	6.02878e-08
NAP057003-1		2.34768	1.0421e-11	1.87323	1.10731e-09	1.27613	0.046	1.37923	0.04197
Grpr	NM_008177	2.34759	0.00202	1.64183	2e-05	4.37426	6.16988e-15	1.93982	0.06219
Klri2	NM_177155	2.34673	1.01365e-27	2.03296	0.00023	1.05169	0.69753	1.48425	2.65486e-06
Pram1	NM_001002842	2.34601	7.54412e-39	2.41087	1.46371e-29	2.3487	8.29605e-16	1.76362	2.6273e-14
Pdia4	NM_009787	2.34484	2.36107e-24	1.9562	2.4982e-14	1.21417	0.00079	1.16118	0.02235
Tm7sf4	NM_029422	2.34468	1.05973e-07	2.37308	1.93187e-26	3.81281	1.38918e-25	3.85233	0
AI480535	BU609786	2.34347	3.41674e-12	2.01203	7.62137e-08	-1.04975	0.61984	-1.46786	0.00171
Lgi2	NM_144945	2.34306	6.00536e-19	2.27551	1.09207e-27	2.0269	1.13523e-19	2.26764	5.21995e-22
Clca2	NM_030601	2.34273	1.01131e-06	1.83272	7.10563e-07	1.78868	4.68937e-06	1.00604	0.94773
AY078069	NM_172142	2.33849	5.21675e-41	1.95877	5.71303e-31	2.09448	8.28136e-15	2.42781	4.51974e-09
A630033H20Rik	NM_175442	2.33784	5.23974e-14	1.80135	2.33332e-16	1.38389	0.00063	1.3764	3.64092e-06
Gng2	NM_010315	2.33409	9.27297e-12	1.91557	1.71858e-15	1.30728	0.02262	1.40635	0.02196
9230105E10Rik	NM_175677	2.33174	2.56788e-15	2.07076	6.33896e-26	1.19537	0.07151	1.06031	0.27011
Armet	NM_029103	2.33014	7.46831e-26	2.05867	1.80321e-30	1.57185	7.48911e-09	1.59365	2.59944e-10
D030070L09Rik	NM_172625	2.329	1.4013e-45	1.91709	1.33187e-28	1.60157	3.10632e-10	1.51407	3.73869e-12
Dio2	NM_010050	2.32778	1.08106e-27	1.74117	1.18724e-13	2.25517	3.12876e-20	2.27987	2.45347e-27
Lgals8	NM_018886	2.32722	5.60519e-45	1.58442	2.52336e-07	1.13075	0.03579	1.15657	0.02373
Zc3h12d	NM_172785	2.32707	2.68035e-31	1.55304	8.86246e-07	1.67764	3e-05	1.6101	8.1953e-07
Emilin2	NM_145158	2.32617	2.56077e-11	2.43074	0	2.23996	7.44202e-41	2.28099	8.52421e-40
Kif15	NM_010620	2.32578	1.09485e-33	2.2406	5.27813e-27	2.77394	1.67563e-30	1.74623	7e-05
Osm	NM_001013365	2.32483	8.3315e-15	2.19815	2.93357e-18	2.52434	2.81382e-19	2.6507	3.68777e-29
2610318N02Rik	NM_183287	2.324	4e-05	3.13247	9.49772e-13	1.83175	0.00734	2.29261	6.4594e-18
Pglyrp2	NM_021319	2.32391	2.5624e-17	1.61825	4.69918e-11	1.56194	4.82906e-10	2.01308	9.33525e-17
Slpi	NM_011414	2.32239	3.39442e-28	1.91672	3.71487e-23	2.38577	0	2.48307	1.05608e-38
Lyn	NM_010747	2.32224	1.42802e-13	1.63778	1.81247e-08	1.02257	0.68781	1.16999	0.05529
Slc16a1	NM_009196	2.32131	1.58951e-14	1.55405	0.00017	1.19629	0.02276	1.12563	0.26028
NAP030857-1		2.32124	8.52986e-09	2.03655	8.09589e-07	1.8208	4e-05	1.78131	1.20074e-12
Cyb5b	NM_025558	2.32113	3.04037e-14	1.8179	1.61743e-17	1.37296	0.00169	1.44652	5e-05
Rad18	AK028505	2.32107	7.85814e-13	1.82604	4.65125e-19	1.92081	2.64406e-22	1.54167	6e-05
Acp2	NM_007387	2.32087	8.27236e-17	1.56281	2.79226e-11	1.48177	9.13907e-13	1.4204	1.01078e-11
Car6	NM_009802	2.31939	3.25725e-15	2.42559	1.23542e-07	3.93544	3.52184e-23	3.32446	7.53179e-35
NAP120816-001		2.31925	1.15579e-07	1.49819	2.26051e-06	1.45004	0.00066	1.39245	0.00686
Arhgdib	NM_007486	2.31776	2.74626e-21	1.80796	2.27418e-09	1.42301	0.00108	1.7028	9.43567e-17
G431001E03Rik	NM_177364	2.31589	8.05582e-27	1.79163	5.09719e-13	1.9801	6.00681e-35	1.92089	3.48843e-29
Gramd3	AK018691	2.31241	9.40138e-11	1.5163	0.00216	1.30471	0.01402	1.31554	0.0167
S100a4	NM_011311	2.31026	2.67893e-33	3.44324	1.27002e-32	4.11273	4.32919e-28	3.95261	0
Chaf1a	NM_013733	2.30936	8.42362e-19	2.06991	2.13862e-29	2.20616	4.08345e-40	1.75711	7.31321e-16
Rps14	AI841821	2.30861	5.95551e-21	1.82769	7.77034e-08	-1.02859	0.80903	1.04141	0.81233
Ada	NM_007398	2.30834	9.74137e-13	1.93699	2.82596e-09	1.46939	5e-05	1.31575	0.00066
Dok2	NM_010071	2.30589	1.88115e-29	2.53885	3.05483e-43	1.92127	9.48862e-21	2.30577	1.00151e-41
Mtac2d1	NM_028924	2.30528	1.31605e-10	1.69684	6.24201e-11	1.27566	0.02593	1.24262	0.18669
Fbxw17	NM_175401	2.30223	1.4013e-45	1.64422	2.86222e-11	1.06541	0.31344	-1.0113	0.84195
Ifi35	NM_027320	2.30113	9.2138e-34	1.74308	2.9487e-09	1.26073	0.01154	1.05755	0.57653
A_51_P402908		2.30085	9.59889e-42	1.84886	1.61912e-22	1.7601	1.25631e-09	1.81393	1.65094e-19
Mcm3	NM_008563	2.30084	2.34646e-15	2.06214	8.41591e-26	1.62134	8.91948e-12	1.66664	3.50389e-22
Tnfsf13b	NM_033622	2.30077	9.92255e-27	2.07818	8.25308e-29	1.474	1.07788e-11	1.59005	3.96028e-11
2310047M15Rik	BG975676	2.29937	1.93837e-26	2.18789	2.0941e-38	1.23362	0.00124	1.2639	1e-05
Gmfb	NM_022023	2.2976	0	1.76858	1.06677e-08	1.44527	5.8694e-12	1.46316	5.61584e-06
Socs3	NM_007707	2.297	3.65061e-35	2.18994	4.86778e-28	2.44468	6.35426e-25	2.17385	1.81875e-27
C2	NM_013484	2.29672	5.78917e-28	1.60136	3.77045e-17	-1.01041	0.86566	1.00194	0.96941
Creb5	NM_172728	2.29525	1.35429e-31	1.77909	2.78636e-17	1.22567	0.01701	1.12727	0.16568
Ncf2	NM_010877	2.29272	8.40779e-45	1.80245	1.68232e-14	1.74741	1.3544e-11	1.82213	3.22807e-15
Cstb	NM_007793	2.29146	4.0249e-07	1.89846	3.50561e-07	1.74493	5e-05	1.81244	2e-05
Rnf149	XM_129803	2.29002	2.32823e-15	1.8729	5.02703e-08	1.96147	1.53503e-30	1.56519	6.47555e-11
Mcm6	NM_008567	2.28912	5.09152e-09	2.09906	1.95594e-11	3.39922	5.44209e-36	2.58844	7.30553e-18
Hist1h1d	NM_145713	2.28727	1.7416e-10	1.74899	1.52691e-15	1.4159	0.00018	1.92384	4e-05
Batf	NM_016767	2.28709	1.54641e-25	1.84737	2.43481e-13	1.85456	5.36955e-15	2.16909	1.32808e-38
Ifitm6	AI386420	2.28646	6.60659e-11	1.92807	1.62769e-08	2.51371	2.52078e-12	1.68481	3.46212e-08
Gcnt1	NM_010265	2.28199	1.75315e-22	1.97034	4.84475e-17	1.94192	1.39248e-09	1.8217	5.08265e-21
Gimap7	NM_146167	2.2799	2.19794e-16	1.35233	2.93648e-06	1.00795	0.9273	1.4701	9.47006e-06
Slc16a3	NM_030696	2.27977	5.78453e-32	1.72307	1.41865e-23	1.74234	4.53689e-23	1.63085	3.89809e-18
Arf6	NM_007481	2.27894	1.26679e-24	1.35516	0.06232	-1.06488	0.64784	1.08906	0.44237
Nup43	NM_145706	2.2768	1.69279e-10	1.57033	3e-05	1.75602	0.00058	1.65564	1.4897e-16
Crmp1	NM_007765	2.27556	5.97647e-18	1.88719	2.75179e-10	1.81301	2.11629e-11	1.69443	1.11879e-21
Dars	NM_177445	2.2749	1.25396e-12	1.77131	8.94012e-06	1.06627	0.20222	1.2843	2.10684e-06
4921507G05Rik	AK014831	2.2747	1.04693e-25	1.76488	1.01481e-11	1.88259	6.48835e-15	1.52928	1.37547e-07
Hck	NM_010407	2.2743	5.36175e-09	1.71614	7.65188e-09	1.25571	0.00192	1.29393	2.16268e-06
Stx11	AK017897	2.27414	4.49838e-15	1.63276	5.61045e-11	1.32958	0.00048	1.35442	7.73791e-09
Pla2g4a	NM_008869	2.27305	7.01436e-21	1.86357	3.73162e-10	1.23791	0.01314	1.14832	0.07559
Hgf	NM_010427	2.2725	2.91285e-20	1.70922	1.91668e-14	1.28328	0.00014	1.25974	0.00023
LOC544702	XM_618772	2.2706	5.06385e-09	2.03249	0.00031	1.37681	0.07852	1.02201	0.92562
Parp3	AY046317	2.26884	6.34306e-07	1.5029	0.01605	1.20467	0.27138	1.1229	0.30904
Myo5a	NM_010864	2.26749	1.45673e-33	2.03764	1.09916e-16	1.91579	1.10326e-06	1.96348	2.13253e-14
Bcl2l11	NM_207680	2.26578	8.14032e-29	1.68661	3.40845e-13	1.70465	1.77933e-09	1.54499	1.86762e-09
2810407C02Rik	BC038867	2.26499	2.25421e-10	1.57686	7e-05	1.41398	0.00706	1.36032	0.0038
TC1521029		2.26328	8.96851e-22	2.09912	2.74278e-18	2.15543	7.84911e-18	1.74337	8e-05
2010106G01Rik	NM_023220	2.26215	2.23962e-19	1.75943	3.37365e-19	1.3134	0.01385	-1.00959	0.87889
A_51_P306031		2.2615	9.30328e-33	1.33223	0.01027	1.10998	0.17608	1.62436	1.32661e-12
Ankrd41	NM_172756	2.26083	1.19703e-10	1.86266	2.80646e-06	2.21634	8.54356e-19	1.84384	3.0702e-14
AI451877	AI451877	2.26055	4.31409e-12	1.85712	1.84836e-15	1.37531	0.00842	1.15217	0.49523
Cotl1	NM_028071	2.25968	1.36089e-27	1.98623	7.17825e-27	1.89368	3.66899e-26	1.82229	2.94411e-09
C5ar1	NM_007577	2.2585	2e-05	1.72069	1e-05	1.60881	0.00086	1.71262	0.00985
Tmed2	NM_019770	2.25724	4.67715e-08	1.86335	1.61133e-07	1.34654	3.39972e-06	1.11631	0.41352
Dr1	NM_026106	2.25652	6.81612e-14	1.74113	3.65636e-17	1.442	5e-05	1.19041	0.17242
Mov10	NM_008619	2.25625	4.2213e-35	1.38818	3.49811e-08	1.03184	0.72658	1.02325	0.72916
Fabp7	NM_021272	2.25429	2.40265e-25	1.18594	0.00826	2.17743	2.36061e-11	1.35249	0.00633
Ccdc67	NM_181816	2.25049	2.18124e-26	1.92264	5.2481e-13	2.22227	8.36494e-15	1.55453	8.48486e-09
C820004L04Rik	AK030944	2.25041	6.15296e-22	1.73166	1.2615e-13	1.52551	1.90075e-09	1.5796	0.00013
Rnase6	NM_030098	2.24956	2.32889e-12	1.79833	4.41261e-10	-1.06566	0.38201	1.12329	0.30727
NAP101659-1		2.2485	2.60881e-25	1.5559	0.00088	1.2748	0.00446	1.22815	0.01304
Casp3	NM_009810	2.24647	3.14565e-17	1.41106	0.02334	1.11764	0.62225	-1.15699	0.1461
BC030867	NM_153544	2.24612	2.60271e-36	1.98264	1.28589e-13	1.8874	4.41499e-09	1.33208	4e-05
Cbfb	NM_022309	2.24574	8.47183e-21	1.88706	4.45838e-09	1.2481	0.02742	1.10914	0.04832
Kpna3	NM_008466	2.24358	6.57126e-16	1.84985	2.27184e-20	1.60743	1.55115e-12	1.27244	0.00062
Relb	NM_009046	2.24297	3.2328e-29	1.8165	7.88378e-11	2.04178	5.0487e-18	2.4222	0
C330023M02Rik	NM_172722	2.24256	4.19356e-17	1.40172	2e-05	1.32956	3.09231e-08	1.15939	0.01811
4933405A16Rik	NM_028943	2.24251	7.3794e-38	1.99333	8.00395e-13	1.87237	5.40744e-15	1.66737	6.01947e-15
Aim1	BC059272	2.24235	1.01329e-31	1.71433	1.03624e-15	1.3288	0.00197	1.26207	0.05946
Tube1	NM_028006	2.24195	4.00727e-10	1.91446	6.44084e-26	2.39653	7.28151e-32	1.80822	1.35816e-08
Hmgb2	BC046759	2.2412	4.53503e-21	1.85033	0.00017	1.47588	0.00505	1.35343	0.01472
4732419C18Rik	XM_489255	2.24058	1.62353e-16	2.03189	6.65674e-10	2.94622	1.10833e-33	1.76793	0.00028
Tcam1	NM_029467	2.23852	2e-05	1.39133	0.02591	1.22284	0.11725	1.01007	0.88867
Ripk2	NM_138952	2.23598	1.01874e-42	1.78285	1.0515e-15	1.11532	0.24165	1.10972	0.23342
Incenp	NM_016692	2.23515	1.11985e-18	1.92011	2.46062e-17	1.96335	2.93575e-24	1.89363	4.08252e-23
Wdfy2	NM_175546	2.23409	1.26273e-07	1.43502	0.01263	1.49966	0.00119	1.43874	0.0002
Treml4	NM_172623	2.23271	2.82373e-17	1.56471	4.21618e-09	1.25281	0.0043	1.54757	3.6011e-08
Klra23	NM_024470	2.23087	6.6174e-17	1.65212	1.82748e-19	-1.11812	0.08259	1.14038	0.19251
Tcp11l1	NM_177190	2.22956	1.24239e-16	1.91169	4e-05	1.68612	7.32174e-13	1.67286	1.0023e-07
BC006779	BC052532	2.22893	3.88045e-10	1.25189	0.00222	1.01969	0.77163	-1.05752	0.32193
Myc	NM_010849	2.22746	1.17253e-11	1.6242	1.49115e-13	1.30288	0.01988	1.36337	0.03934
Dld	NM_007861	2.22513	1.07438e-12	1.58844	6.81803e-08	-1.05826	0.26121	1.20858	0.13461
Fgr	NM_010208	2.22081	3.1839e-19	2.07809	4.51752e-19	2.00668	1.33444e-17	2.17435	1.66419e-29
Nrg1	AY648975	2.21912	2e-05	1.58178	0.00329	1.93478	6.03264e-10	1.77678	2e-05
8030462N17Rik	AK046785	2.21895	6.1015e-11	1.74755	1e-05	1.7923	3.39958e-07	1.40656	0.00154
Snx6	NM_026998	2.2183	4.70937e-30	1.77031	5.25415e-19	1.22066	0.00842	1.1747	0.01061
Ifi30	NM_023065	2.21818	6.53264e-07	1.89777	2.88232e-14	1.29537	0.00924	1.49751	7e-05
Rpe	NM_025683	2.21666	6.87999e-32	1.65442	1.13834e-12	1.33734	0.00115	1.27182	0.01837
Zdhhc15	NM_175358	2.21361	4.00783e-18	1.46022	0.00108	1.64008	6.28196e-06	1.3583	0.01595
1110018G07Rik	NM_178065	2.21282	9.86817e-11	1.51604	7.56386e-08	1.0395	0.63472	1.02157	0.83313
D430020J02Rik	AK085944	2.21282	2.9808e-09	2.05014	4.68498e-06	2.19522	3.62402e-06	2.49918	4.25607e-24
BC048355	NM_207161	2.21255	1.70671e-24	2.17758	3.17641e-26	2.56466	1.52764e-26	2.00553	3.12927e-23
2210012G02Rik	NM_025617	2.21232	1.85481e-09	1.64705	7e-05	1.48808	0.01634	1.52973	8e-05
Cx3cr1	NM_009987	2.21032	8.71686e-14	2.04357	6.47128e-20	1.71681	4.25081e-23	2.1285	2.99018e-14
Rnf121	AK016037	2.21026	1.96072e-08	1.70235	4e-05	1.3775	0.00074	1.36066	0.01367
Ptgds2	NM_019455	2.20991	6.50265e-12	1.77583	2.09264e-08	1.62805	2.99271e-12	1.69038	7.9888e-12
TC1516250		2.20887	1.73085e-13	2.20009	1.30783e-11	2.19914	4.27143e-15	2.09137	3.50192e-34
Smg7	NM_001005507	2.20775	8.06051e-07	1.66372	1e-05	1.38751	0.01964	1.3576	0.00666
Tlr3	NM_126166	2.20732	1.61848e-16	1.40879	0.00827	1.06887	0.60322	1.02466	0.76668
Agps	NM_172666	2.20729	1.60233e-17	1.80812	5.73828e-09	1.61145	1e-05	1.38083	0.00081
D15Mit260	AK129419	2.20563	5.68659e-11	1.72379	3.56447e-13	1.47577	7.2206e-08	1.44118	6e-05
A_51_P281057		2.20518	1.64244e-12	2.25589	5.63503e-28	3.70896	3.08204e-21	3.39022	4.86386e-24
Ppt1	NM_008917	2.20468	1.09324e-06	1.78666	6.55705e-07	-1.06269	0.55947	1.12964	0.14877
Amica1	NM_001005421	2.20466	1.29209e-32	1.63958	2.09622e-19	1.44697	2.01033e-09	1.21781	0.00014
Ebi3	NM_015766	2.20368	8.34283e-21	1.82432	1.39883e-17	1.6883	1.49748e-17	1.96055	1.74661e-22
NAP102790-1		2.20005	3.21431e-38	1.59639	3.65111e-15	1.2132	0.00046	1.06531	0.25972
Stx16	NM_172675	2.19892	1.12271e-21	1.50864	3.80652e-06	1.41713	0.00021	1.16713	0.04829
Ccrl2	NM_017466	2.19847	3.44121e-15	1.64142	4.55997e-13	1.18655	0.06136	1.13546	0.06871
Susd3	NM_025491	2.19686	8.4684e-22	1.56888	3.27183e-11	1.57928	4.08461e-14	1.81645	1.52617e-09
Cxadr	NM_009988	2.19592	4.80107e-07	1.82019	5.76856e-11	1.76515	1.13272e-06	1.87279	2.2297e-08
E2f3	XM_127250	2.18703	5.68664e-23	1.879	2.23465e-15	1.38069	0.00076	1.75559	2.58714e-16
LOC433762	NM_001012326	2.18285	3.6873e-08	2.59758	9.76406e-37	1.33239	0.00012	1.2293	0.0881
Arhgap30	NM_001005508	2.18167	2.31949e-36	1.49412	9.5765e-15	1.32198	0.00115	1.62876	2.72641e-10
BC010304	AI425808	2.17972	3.54729e-10	1.64055	0.00017	1.65351	0.00295	1.58312	0.00021
BC032204	NM_153795	2.17928	4.79191e-13	1.5283	5.452e-08	1.23352	0.01231	1.45704	1.45076e-07
Ly9	NM_008534	2.17921	6.73907e-13	1.27358	0.01517	1.07481	0.47881	1.22974	0.13441
NAP103523-1		2.17852	6.05596e-11	1.95705	6e-05	-1.03941	0.80808	-1.19495	0.17233
Fap	AK051959	2.17848	0.00032	1.32702	0.04348	1.17079	0.37519	-1.72172	0.00023
Prf1	NM_011073	2.17839	6.60666e-17	1.80867	1.06015e-21	-1.1008	0.40646	1.23304	0.00014
Panx1	NM_019482	2.17658	1.06139e-06	1.77959	2.11384e-08	1.30346	0.00318	1.44824	2.08023e-06
Gmppb	NM_177910	2.17202	6.80632e-34	1.69227	1.25672e-14	1.47076	4.43608e-11	1.34379	5.75203e-07
Gpr157	NM_177366	2.17165	2.1372e-07	1.34717	0.00647	1.45338	0.00571	1.35618	0.0133
Loh11cr2a	NM_172767	2.17155	2.17131e-41	1.98763	1.08661e-32	1.33077	2.10298e-08	1.26201	0.0003
Eomes	NM_010136	2.17121	2.40059e-13	1.37034	0.00617	1.04054	0.76724	1.06636	0.45716
Snx2	NM_026386	2.17082	2.17486e-12	1.36988	6e-05	1.0695	0.50569	1.13954	0.05513
Psd4	NM_177611	2.17042	1.16114e-18	1.47058	1.38563e-09	1.28404	0.00455	1.54092	1.66451e-10
4930415O20Rik	BC048564	2.16789	7.56771e-19	2.05118	2.01412e-20	2.27512	4.42091e-11	2.32701	1.49639e-26
9130211I03Rik	NM_030060	2.16763	1.11692e-14	2.21553	5.79888e-29	1.62969	6.93334e-14	1.79051	8.02407e-15
NAP057035-1		2.16666	7.70182e-11	1.43367	0.00201	1.19109	0.13918	1.28096	0.01432
Slc31a2	NM_025286	2.16659	8.92356e-09	1.79148	5.57729e-22	1.30444	0.00296	1.38322	1.72014e-09
Gosr1	NM_016810	2.16633	6.41044e-29	1.6201	5.05422e-12	1.14893	0.03962	-1.07286	0.22876
Mtpn	NM_008098	2.16581	7.07798e-37	1.80966	1.09349e-18	1.56928	1.41081e-14	1.42014	3.4567e-06
Gad1	NM_008077	2.16554	1.75354e-17	1.69755	2.61918e-06	1.76815	3.74081e-12	1.76947	3.13159e-07
9630037P07Rik	XM_149022	2.16534	1.62377e-25	1.48313	1.70738e-10	1.27432	0.00033	1.11246	0.04958
E330016A19Rik	NM_173386	2.16327	5.34035e-42	1.64739	1.4254e-12	1.62173	6.64929e-16	1.43145	6.86403e-07
Lta	NM_010735	2.16272	4.12727e-37	1.53489	2.95013e-12	1.86755	1.4013e-45	2.47895	8.62025e-25
3110043O21Rik	BC076612	2.1617	1.45445e-09	1.84133	2.41957e-24	1.15095	0.18336	1.25308	0.03679
Mmp3	NM_010809	2.16124	9.96352e-30	1.94885	8.34021e-34	3.05481	0	2.37828	3.51722e-35
TC1433510		2.16069	2.16831e-18	1.9376	2.26854e-27	1.23012	0.02331	1.08714	0.13707
Klra9	NM_010651	2.15987	1.14206e-42	1.79052	7.33483e-12	-1.11095	0.27393	1.33587	3.34064e-07
P2ry6	NM_183168	2.15986	3.69302e-17	2.19449	8.11397e-15	1.8496	4.73626e-11	1.90527	1.53088e-32
LOC193676	XM_110146	2.15733	2.33511e-08	1.89472	4.55939e-09	1.12232	0.08536	1.1792	0.02692
Ifitm3	NM_025378	2.15522	6.55961e-07	1.91328	2.62208e-13	1.36844	0.0007	1.35292	0.00298
Fancd2	XM_132796	2.15475	5.61863e-06	2.03198	2.04611e-08	2.55709	4.75158e-15	1.77808	1.82474e-06
Tmprss4	NM_145403	2.15398	4.64736e-39	1.8809	8.95823e-16	1.56683	1.75757e-11	1.43754	7.84141e-09
Jak2	NM_008413	2.15376	1.33229e-21	1.68552	7.25851e-13	1.47635	8.7131e-10	1.51735	8.71182e-06
6330442E10Rik	NM_178745	2.15332	1.08426e-14	1.659	2.87496e-10	1.10815	0.14999	1.1747	0.0047
Arpc5	NM_026369	2.15316	4.45017e-11	1.59921	7.01214e-13	1.27443	0.00813	1.41995	0.00141
Tor1aip1	NM_144791	2.15311	5.32923e-15	1.34019	7e-05	1.05802	0.47649	1.03018	0.72642
Psrc1	NM_019976	2.15284	5.29343e-08	1.6461	2.61367e-07	1.98034	3.08537e-07	1.36888	0.01704
Cxcl15	NM_011339	2.15083	6.59944e-11	1.77714	2.96144e-14	1.60813	7.57773e-07	1.85492	3.54798e-12
Pdcl	NM_026176	2.15069	1.09188e-06	1.50987	0.00025	-1.04136	0.58653	-1.0732	0.58669
Xlr5d	BC051681	2.15048	5.5263e-14	1.98598	5.38744e-32	-1.05095	0.8169	1.19477	0.07131
Retnlg	NM_181596	2.1495	4.35742e-21	1.81351	3.85813e-21	1.53858	2.4282e-10	1.3004	6.47744e-07
Slc6a12	NM_133661	2.14928	8.07394e-08	1.92354	4.36132e-19	2.903	1.47181e-06	1.97363	7.14466e-10
A930003A15Rik	AK020919	2.14908	3.30488e-21	1.42884	0.00102	2.64966	2.27213e-12	2.18592	1.62445e-20
Xdh	NM_011723	2.14856	1.38317e-25	2.39228	2.42097e-14	-1.1127	0.35405	-1.19892	0.08193
Plekha4	NM_148927	2.14829	2.41112e-15	1.33121	0.00033	1.5166	5.00619e-06	1.27864	0.00031
Dnmt3a	NM_007872	2.14812	1.38113e-38	1.41927	9.73492e-11	1.25071	6e-05	1.32684	1e-05
Gp2	NM_025989	2.148	1.34781e-16	1.79694	7.61703e-17	1.90781	0.00046	1.67902	2.64008e-07
2700019D07Rik	NM_028287	2.146	5.66079e-18	1.43668	9e-05	1.09457	0.28364	-1.10304	0.09653
Psma5	NM_011967	2.14534	2.23138e-28	1.77379	3.38162e-24	1.25254	8e-05	1.10728	0.13998
Ulbp1	NM_029975	2.14274	1.0031e-10	2.35169	4.40819e-23	2.5834	0	2.15671	1.32529e-14
4930521E07Rik	AK015861	2.14202	1.39459e-20	1.87454	5e-05	2.02761	8.51906e-12	1.91635	2.02094e-08
Prss22	NM_133731	2.14165	5e-05	1.45752	3e-05	1.50595	4.95611e-07	-1.06747	0.30036
Tnfrsf12a	NM_013749	2.14158	8.36435e-12	1.67202	6e-05	1.61411	3e-05	1.41055	2.56086e-06
Piga	NM_011081	2.14121	3.14006e-08	1.96633	4.1359e-11	1.65374	7.46964e-07	1.29001	0.04919
Lnpep	NM_172827	2.13937	4.57639e-15	1.55262	3.69958e-16	1.32558	1.51161e-06	1.10123	0.32337
Calu	NM_184053	2.1386	8.18067e-25	1.54513	0.00089	1.08417	0.34924	1.09615	0.36569
C920005C14Rik	NM_177391	2.13844	5.84458e-10	1.4415	9e-05	1.62203	2e-05	1.43305	6e-05
Als2	NM_028717	2.13726	4.94774e-22	1.28025	0.02231	1.03852	0.81793	1.19392	0.06785
Crem	AK016156	2.13716	7.73107e-13	1.96388	6e-05	1.26055	0.1533	1.34008	3e-05
Sla	NM_009192	2.13711	1.24253e-08	1.59392	7.30015e-16	1.19707	0.00131	1.17003	0.00244
Plekhb2	NM_145516	2.13676	1.89785e-32	1.46401	1.44361e-12	1.30497	0.00609	1.27777	3e-05
AK042798	AK042798	2.13625	1.94151e-09	1.94025	1.43445e-07	1.72887	5e-05	1.62255	8e-05
Gtdc1	AK038057	2.1348	2.06554e-25	1.8941	3.82338e-08	1.16871	0.54323	1.918	4.1429e-07
Lig1	NM_010715	2.13399	9.27091e-15	1.99309	7.60998e-16	1.87184	6.35262e-13	1.69262	1.0117e-11
LOC195531	BC058613	2.13334	1.01881e-12	1.62289	1.14247e-18	1.42697	7.51435e-09	1.25474	0.00011
Icos	AF327185	2.13279	1.37518e-11	1.74546	6.1764e-09	1.88031	5.90483e-26	2.2588	8.88466e-09
Etnk1	AK044502	2.13218	4.74043e-08	1.28322	0.0292	1.02605	0.7175	-1.00085	0.99479
NAP103072-1		2.1317	4.4289e-08	1.82474	0.00044	1.03133	0.83543	-1.13555	0.313
1200015F23Rik	XM_203936	2.13131	4.12377e-13	1.79756	1e-05	-1.13022	0.32036	-1.11745	0.44297
Gosr2	NM_019650	2.13121	2.33362e-09	1.70156	1e-05	1.52299	0.00412	1.43682	0.00026
BC066140	BC066140	2.1306	3.98854e-10	1.70492	4.32745e-06	1.48095	0.00384	1.3472	0.2213
Syce2	NM_027954	2.13033	1.2657e-13	1.97807	4.32872e-10	1.80191	7.52387e-09	1.67989	6.16049e-09
Ptk9	NM_008971	2.12933	9.70146e-31	1.59916	2.94721e-06	1.44353	6.3801e-06	1.40124	1.10628e-08
Rab20	NM_011227	2.12767	8.1739e-34	1.65183	6.09403e-14	1.56907	1.28222e-12	1.51916	3.96677e-08
Rsnl2	NM_030179	2.12616	3.52215e-15	1.62104	0.00042	1.33815	0.00015	1.49591	2.50728e-11
Pitpna	NM_008850	2.12529	1.02946e-17	1.7041	1.85457e-11	1.25207	5e-05	1.29184	0.00028
1190002F15Rik	AK012387	2.12282	1.77669e-08	1.87335	6.53659e-11	2.62719	8.82912e-16	2.02675	2.58444e-14
TC1447684		2.12181	1.25034e-12	1.79966	2.85396e-08	1.64854	4.2857e-09	1.53669	1.74289e-07
Klhl6	NM_183390	2.12063	3.94297e-23	1.65165	1.57616e-14	-1.00111	0.98981	1.09864	0.28788
Dock2	NM_033374	2.11966	4.44242e-06	1.2867	0.00019	-1.02186	0.72075	1.49204	2.35593e-06
9830130M13Rik	NM_177713	2.11915	1.53004e-30	1.68501	9.11368e-09	1.54085	0.00052	1.92159	1.56226e-19
Fanca	NM_016925	2.11886	2.06981e-10	1.43959	0.0001	1.17716	0.05887	1.0501	0.57563
4930432O21Rik	NM_001025373	2.11843	3.52784e-19	1.45307	0.01741	1.10197	0.09676	1.12812	0.16068
NAP101638-1		2.117	4.04031e-25	1.91059	2.7951e-25	1.62363	2.65323e-08	1.33493	6.73685e-07
Rars	NM_025936	2.11447	6.40257e-13	1.66196	0.00022	1.07999	0.5166	1.05094	0.75848
Fmnl1	NM_019679	2.11426	3.5782e-13	1.53049	2.05988e-09	1.38181	0.01048	1.68604	1.5404e-10
Klk1b3	NM_008693	2.11251	7.43836e-12	-1.09588	0.34607	1.2496	0.02938	1.14296	0.06308
Auh	AK003929	2.11193	7.13068e-20	1.622	5.21097e-10	1.50665	0.00043	1.41297	4.13e-07
1700011H14Rik	NM_025956	2.11185	3.34765e-09	2.95681	1.69804e-21	7.77954	0	3.71447	6.33197e-16
Psmd14	NM_021526	2.11084	2.63991e-11	1.7246	7.3865e-10	1.42042	0.00314	1.32534	7.44874e-08
Rhoh	AK017885	2.11066	7.65254e-27	1.20178	0.00038	1.09336	0.20016	1.44366	1.13056e-08
Sdk1	NM_177879	2.11047	5.03678e-38	1.5863	7.35031e-09	1.45556	5.18281e-11	1.35312	0.00094
Klra7	NM_014194	2.10928	3.82845e-16	1.61083	4.65231e-17	-1.10792	0.10291	1.16026	0.00446
1500005I02Rik	NM_028055	2.10918	2.22636e-08	2.10736	7.31629e-07	2.97201	1.99746e-20	2.32445	5.03691e-29
Ccdc86	NM_023731	2.10871	4.24358e-21	1.51468	1.23252e-13	1.41407	1.50457e-07	1.36717	2e-05
1700008A04Rik	AK005748	2.10678	5.17879e-18	1.45824	0.00015	1.2454	0.02772	1.15737	0.04909
Trem2	NM_031254	2.10452	6.04246e-17	2.4034	1.34871e-26	2.69611	2.85304e-42	2.52895	3.7149e-31
LOC245305	XM_143022	2.10401	7.97777e-33	1.35796	0.01549	1.2252	0.04626	1.09823	0.31851
Cd68	NM_009853	2.10379	3.44665e-15	1.92591	5.77987e-29	1.82886	1.02311e-11	1.99014	1.98196e-27
Irf8	NM_008320	2.1037	1.37016e-06	1.80629	1.50056e-07	1.06751	0.60381	1.32196	0.00873
Arrdc4	NM_025549	2.10217	4.3643e-23	1.6086	2.45717e-11	1.39356	4e-05	1.56956	1.97328e-14
TC1453818		2.1005	2.93175e-23	2.16785	5.8518e-19	-1.00134	0.98471	-1.17591	0.00241
Entpd7	NM_053103	2.09978	8.49854e-07	1.7048	0.00012	1.77708	1e-05	1.33977	0.07767
LOC545419	XM_619750	2.09944	5.121e-08	1.82386	3e-05	1.10354	0.53108	-1.08399	0.59489
Cmtm7	BC026773	2.0992	1.14301e-32	1.62077	1.96363e-08	1.43718	3.76127e-11	1.559	1.3885e-11
Ppm1h	NM_176919	2.09726	3.25182e-12	1.4437	1.2337e-09	1.22405	0.01137	1.25512	0.00432
D10Ertd438e	NM_030250	2.09688	6.06793e-16	1.72796	4.53888e-10	1.47426	1.35049e-08	1.5138	7.35488e-12
Asahl	NM_025972	2.09662	1.95797e-14	1.86405	2.21698e-13	1.26685	0.00151	1.4411	7e-05
Qpctl	NM_026111	2.09425	1.9025e-09	1.60211	6.0273e-06	1.7286	8.21525e-07	1.73882	2.00406e-24
BC030183	NM_182783	2.09297	9.43155e-15	1.24135	0.00331	1.84781	1.80056e-08	1.6062	0.00035
Tbxas1	NM_011539	2.09252	1.0544e-21	2.20226	3.16744e-39	1.44314	3.86769e-08	1.68733	2.72861e-21
Ifrg15	NM_022329	2.09134	5.18885e-23	1.31337	1e-05	1.17646	0.00242	1.04862	0.45742
Hif1a	NM_010431	2.08848	9.66682e-18	1.5927	1.97429e-14	1.60252	6.90467e-19	1.29063	0.00416
Fbn1	NM_007993	2.08729	1e-05	1.55834	0.01147	1.5778	0.00676	1.3925	0.07881
Klrd1	NM_010654	2.0872	3.23908e-29	1.53562	1e-05	1.13845	0.10739	1.54483	9.24568e-12
Kcnt1	AK129355	2.08707	3.362e-07	3.09382	0	1.16219	0.37455	-1.19746	0.01684
Myd88	NM_010851	2.08548	4.38478e-18	1.72035	1.17673e-24	1.58357	1.02486e-14	1.51437	6.92114e-18
Mfsd7	NM_172883	2.08494	2.71634e-15	1.61576	6.94501e-17	1.62885	2.36808e-11	1.50613	2.74908e-14
2010317E24Rik	BC070477	2.08463	4.09982e-07	1.80289	1.04622e-07	2.715	4.1032e-15	2.02307	1.69276e-16
Arid5b	AK087356	2.08425	4.30785e-21	1.69429	2.04438e-10	1.20652	0.02427	1.1164	0.06374
Lypla1	NM_008866	2.08379	1.73249e-08	1.84244	2.22425e-18	1.2562	0.01573	1.16261	0.03984
2010012C16Rik	NM_025564	2.08377	1.16332e-23	1.74768	1.57616e-20	1.37055	4.82807e-09	1.2287	0.01111
6230416A05Rik	AK018089	2.08228	5.59711e-35	1.76338	2.24096e-10	1.50679	1.21387e-06	1.32889	0.00219
TC1482326		2.08006	1.26679e-14	1.80156	3.79364e-11	1.1469	0.05274	1.16738	0.08971
P2ry13	NM_028808	2.07993	1.45789e-07	2.00753	1.74291e-12	1.76771	4.35379e-07	1.52863	3.39043e-09
Ndufab1	NM_028177	2.07953	1.412e-28	1.78893	7.29042e-22	1.89412	6.66765e-19	1.44658	1.11285e-12
Phf6	NM_027642	2.07908	8.91903e-19	1.71637	6.44593e-10	1.47429	0.00038	1.18267	0.00726
Mrfap1	AK015523	2.0786	7.91647e-11	1.78592	5.4811e-11	2.31582	8.75001e-25	1.97081	9.89166e-26
Cdc7	NM_009863	2.07844	1.00625e-07	1.79078	0.00037	1.53465	0.00045	1.39766	0.00031
Lrdd	NM_022654	2.07747	1.22027e-10	1.80393	6.70564e-17	2.07356	1.57526e-31	1.74791	2.93087e-09
LOC545103	XM_619317	2.07575	6.22864e-16	1.77852	2.12907e-17	1.50541	3.32081e-09	1.38223	2.56481e-06
Nfil3	NM_017373	2.07472	1.51637e-16	1.77696	4.25452e-11	1.95287	2.30904e-14	1.66494	7.17143e-08
Pelp1	AK016197	2.07438	3.02488e-15	1.87007	7.10869e-14	1.80615	1.24516e-15	1.71245	1.67148e-10
NAP000727-001		2.07392	3.39075e-09	1.49913	0.00023	1.22666	0.14772	-1.19056	0.15939
Lhfpl2	NM_172589	2.07226	1.4662e-13	1.55281	3.22041e-10	2.02047	1.59326e-28	2.04255	1.52009e-15
Osmr	NM_011019	2.07128	8.50892e-17	1.87127	6.2758e-14	1.7175	7.70198e-10	1.78479	3.0186e-10
Rab37	NM_021411	2.07057	8.64051e-07	1.82605	6.64492e-09	1.43693	1.27534e-10	1.60417	1.7798e-09
Trim59	NM_025863	2.06741	5.80459e-09	1.67287	2.61412e-07	1.49575	4e-05	1.36493	0.0027
Phca	NM_025408	2.06647	2.42085e-35	1.56497	1.46424e-09	1.45564	0.00037	1.26012	0.00306
Ankrd1	NM_013468	2.06555	1.71774e-12	1.54619	1.13796e-12	1.39544	5.44197e-06	1.41347	5.73534e-07
Il17ra	NM_008359	2.06296	2.65966e-25	1.4779	0.0013	1.37538	0.01742	1.56904	1e-05
Disc1	NM_170596	2.06265	1.52259e-10	1.58229	0.00011	1.42372	0.02074	1.47369	0.00431
1700045I19Rik	NM_028842	2.0624	2.0132e-15	2.40996	2.21575e-38	1.4892	1.08564e-07	1.21281	0.00963
Stt3a	NM_008408	2.05994	1.25683e-07	1.79063	3e-05	1.16186	0.11172	1.12637	0.35711
Btk	NM_013482	2.05915	3.33644e-06	1.36756	0.00901	1.37513	0.00721	1.76204	2e-05
Cep170	BC054781	2.05735	2.48828e-09	1.4789	0.0001	1.60541	9.26375e-07	1.54742	0.00999
Irf2	NM_008391	2.05668	2.63852e-12	1.72385	4.96373e-20	1.08821	0.12632	1.01429	0.80822
Tmem38b	NM_028053	2.05601	1.03196e-34	1.73019	3.62379e-12	1.2916	0.01304	1.16324	0.01729
Ppp1r3c	NM_016854	2.05544	4.46813e-15	1.57738	1e-05	-1.13352	0.1376	1.02713	0.86398
Ssr3	NM_026155	2.05528	7.51968e-37	1.7	1.55379e-10	1.44951	1.12009e-06	1.26423	0.00013
C330043M08Rik	NM_177883	2.0547	1.09429e-20	1.02481	0.76296	-1.21034	0.02805	-1.20046	0.07648
Srxn1	NM_029688	2.05458	9.19919e-26	1.32462	3e-05	1.35912	8.23609e-07	1.44332	2.7697e-09
Sat1	NM_009121	2.05441	1.00081e-08	1.4413	3.02831e-08	-1.04961	0.6303	1.16497	0.1616
Stag3	NM_016964	2.0541	7.99905e-20	2.21464	5.99064e-12	2.5635	1.05457e-08	1.85606	7.54755e-07
Camk1d	NM_177343	2.05384	6.97467e-07	1.88148	3.1819e-08	1.4406	0.00814	1.94401	0.0005
Olfr1198	NM_207567	2.05361	7.42334e-22	1.81163	2.17747e-06	1.53262	0.01639	1.47712	9.69015e-06
Nup205	XM_133073	2.05279	2.94091e-26	1.6903	3.08779e-10	1.46123	1.42394e-08	1.33367	2.83308e-06
2410127E18Rik	NM_029742	2.05104	5.51766e-11	1.58183	6.84032e-08	1.51484	6.08994e-07	1.42764	6e-05
Garnl4	NM_001015046	2.05087	2.07533e-08	1.68317	9.54675e-11	1.31402	5e-05	1.27617	2e-05
5830405N20Rik	NM_183264	2.05069	2.56543e-24	1.4382	1.64912e-09	1.09148	0.11376	1.34225	5.84037e-07
Mlstd2	NM_026143	2.05012	2.50338e-21	1.82189	5.22684e-19	1.08684	0.27498	1.17216	0.05797
3200002M19Rik	NM_027532	2.04999	1.55012e-11	1.93472	8.73588e-10	1.81721	2.31269e-11	1.60863	4.33809e-09
D7Wsu128e	NM_138589	2.04799	7.59425e-37	1.76006	3.56935e-16	1.41949	1.57696e-06	1.16343	0.19161
Scamp5	NM_020270	2.04722	7.48887e-07	1.37909	2.5433e-06	1.45993	0.04355	1.33703	0.001
Ubash3a	NM_177823	2.04651	5e-05	1.50904	0.0008	1.08229	0.45805	1.36225	0.01961
Klra13	NM_010647	2.04577	2.96039e-28	1.79039	2.33089e-19	-1.14956	0.13688	-1.01374	0.88135
Rhov	NM_145530	2.04446	3.79994e-17	1.2443	0.01274	1.28581	9e-05	1.22649	0.00057
Lrrc33	NM_146069	2.04418	2.0078e-33	1.5068	5.91238e-08	1.59579	8.91704e-16	1.84694	4.69987e-16
Fes	NM_010194	2.04372	3.90126e-21	1.60139	1.00113e-09	1.48898	7.64162e-10	1.54392	2.59643e-10
Omg	NM_019409	2.04224	6.09914e-10	1.68172	1e-05	1.67233	0.00046	1.30946	0.04842
Itgb7	NM_013566	2.04111	5.64587e-16	1.66672	5.91406e-13	-1.05074	0.5529	1.19226	0.00393
4732465J04Rik	NM_001001499	2.04098	1.48525e-17	2.06824	4.07705e-12	2.47409	5.96683e-15	2.51798	2.82696e-14
Zfp364	NM_026406	2.04044	1.61845e-11	1.63446	1e-05	1.07244	0.21734	1.0313	0.69378
Col1a1	NM_007742	2.04026	5e-05	1.36161	0.00054	1.36666	0.00216	1.53987	0.00029
Hexb	NM_010422	2.03923	3.48025e-08	1.60577	0.00012	1.32715	0.01823	1.39372	0.00015
Alox5ap	NM_009663	2.03784	8.00187e-12	1.84969	3.4655e-17	1.49067	0.00026	1.6743	1.57783e-08
Bzrp	NM_009775	2.03735	5.27019e-36	1.50569	3e-05	1.2154	0.0062	1.16359	0.04758
Ptpn22	NM_008979	2.03733	3.68641e-08	1.32002	0.00714	1.1721	0.06231	1.09212	0.19176
Pip5k2a	NM_008845	2.0363	3.33009e-11	1.75148	9.01455e-15	1.48155	5.10843e-13	1.40973	0.00049
Casp12	NM_009808	2.0361	5.9818e-33	2.05246	1.00013e-12	1.18464	0.08064	1.11609	0.06673
Plekhg4	AK029859	2.03583	1.57872e-15	1.25817	0.00076	1.37862	0.00057	1.03912	0.77308
Arrb2	NM_145429	2.03568	3.62519e-19	1.5172	2.3472e-08	1.33008	1e-05	1.349	1.20259e-08
H2afz	NM_016750	2.03516	1.06336e-09	2.02578	2.99973e-14	2.2619	2.03263e-08	2.04879	2.81372e-15
Coro1a	NM_009898	2.03386	3.56636e-07	1.51474	6.89099e-11	1.19509	0.00396	1.71249	3.85878e-07
Lgmn	NM_011175	2.02883	4.60744e-33	1.24461	0.01816	1.2687	0.01445	1.33449	0.00209
Atp6v1g3	NM_177397	2.02851	2.13473e-11	1.4956	4.13113e-09	2.33055	1.09301e-43	2.52162	1.1441e-27
Ap2b1	NM_027915	2.02755	2.16887e-12	1.73739	1.10604e-21	1.57175	9.10565e-11	1.34079	6.97347e-08
Fcamr	NM_144960	2.0261	3.96929e-14	1.88333	2e-05	1.77749	2.1006e-17	1.9146	5.66646e-11
Sar1a	NM_009120	2.02367	2.04613e-19	1.71805	2.46734e-14	1.62394	7.7903e-07	1.51219	1e-05
NAP096720-001		2.02361	3.28151e-13	1.51051	0.00022	1.08507	0.13358	1.28171	0.00063
1110061O04Rik	NM_026849	2.02352	9.44502e-08	1.36414	0.02031	-1.06098	0.52309	1.1676	0.33649
Grn	NM_008175	2.02316	5.65711e-22	1.3861	0.00035	1.05132	0.55757	1.12502	0.13421
Aire	NM_009646	2.023	1.01305e-07	1.19054	0.11513	2.03615	0.00031	1.68237	0.00013
kallikrein	V00829	2.0229	1e-05	-1.09087	0.2448	1.28365	0.00095	1.24635	6e-05
Cmtm2a	NM_027022	2.02281	6.26003e-13	1.61907	4.47773e-07	1.68564	3.08436e-09	1.69601	3e-05
1700001D09Rik	NM_027025	2.02041	4.00793e-19	1.84947	5.42548e-12	2.1312	5.93761e-11	2.42537	1.04244e-18
Coro2a	NM_178893	2.02018	1.26632e-33	1.65195	1.66417e-14	1.44902	1.59076e-07	1.1913	0.00399
Gns	NM_029364	2.01826	1.10892e-18	1.41348	0.00393	1.09207	0.40027	1.04698	0.65588
Mobkl2a	AK080169	2.01732	1.57013e-35	1.7319	8.18653e-20	1.5112	5.31403e-08	1.69283	5.82871e-18
Slamf6	NM_030710	2.0169	2.64957e-23	1.22701	0.00049	-1.01895	0.71077	1.2426	0.01843
LOC434448	NM_001013815	2.01496	0.00027	1.99385	0.00029	1.30729	0.0627	1.18649	0.20027
Phf19	NM_028716	2.01253	5.89162e-33	1.73579	2.53757e-14	1.69434	1.40556e-16	1.55035	5.454e-07
4930583H14Rik	NM_026358	2.01182	3.29652e-12	1.67156	0.00286	1.00675	0.95867	-1.16916	0.2255
Rab27a	NM_023635	2.01153	4.17356e-17	1.87602	9.33263e-12	1.30615	0.0078	1.02454	0.75612
Gale	NM_178389	2.01121	1.74006e-14	1.9924	3.16772e-18	1.8109	1.373e-09	1.4496	1.58464e-06
Mmp19	NM_021412	2.01063	6.8018e-14	1.73633	4.11421e-12	1.8226	4.08893e-10	1.66132	4.42058e-18
Rfc4	NM_145480	2.01042	1.14782e-29	1.81747	1.60975e-10	2.03779	1.62807e-12	1.6717	1.14751e-14
Cd74	NM_010545	2.01013	2.36319e-10	1.79731	1.26589e-12	1.22619	0.00041	1.5314	5.75675e-06
Rasgrp1	NM_011246	2.00985	1.16629e-29	1.29978	0.00055	1.2818	0.00205	1.49013	1.76093e-06
Uck2	NM_030724	2.00963	1.6605e-24	1.80657	4.40745e-11	2.19501	7.45696e-17	1.93842	2.59973e-09
Rassf4	NM_178045	2.00919	3.02906e-10	1.52657	2.8202e-07	1.52962	1.02911e-06	1.67539	8.17186e-07
Cdc16	NM_027276	2.00889	6.96371e-11	1.288	0.13263	-1.0913	0.23947	-1.02819	0.816
1700113I22Rik	NM_026865	2.00867	1.53741e-14	1.68296	1.16501e-07	1.63924	1.64498e-18	1.42015	0.00048
Pak1	NM_011035	2.00841	1.24693e-28	1.87022	3.64828e-12	1.13754	0.10235	1.1774	0.07924
Txk	NM_013698	2.00805	0.00048	1.3056	0.07935	-1.04149	0.74889	1.13383	0.38475
LOC435337	AK049201	2.00803	1.56924e-11	1.92429	7.16695e-26	1.55552	2.0134e-15	1.25907	0.00234
Setd7	NM_080793	2.00792	2.9644e-13	1.49284	3e-05	1.38624	0.00556	1.40708	9e-05
LOC545329	XM_619643	2.00744	9.23307e-14	1.98606	0.00039	-1.06291	0.6938	-1.15765	0.28141
Extl3	NM_018788	2.00716	2.25797e-17	1.30656	1.46268e-06	1.17988	0.17262	1.25175	0.0097
2310043J07Rik	AK009780	2.00643	3.97707e-21	1.80473	1.89962e-10	2.13036	3.69802e-15	1.20826	0.07682
Mbnl3	NM_134163	2.00636	1.05093e-10	1.80235	1.50107e-14	1.23252	0.09539	1.54438	5e-05
Btg1	NM_007569	2.00543	6.98936e-29	1.63798	4.43782e-07	1.10312	0.30325	1.20922	0.06891
Pcna	NM_011045	2.00517	1.57849e-11	1.93196	4.40035e-10	1.76383	2.68715e-06	1.38466	1.19315e-07
1810048P08Rik	NM_133717	2.00479	2.79672e-15	1.50895	1.58292e-10	1.17742	0.11115	1.24196	0.00989
Smad5	NM_008541	2.00459	8.08282e-21	1.55864	3e-05	1.6431	5.64349e-08	1.27739	0.00554
ENSMUST00000071702		2.00407	1.95234e-32	1.57106	8e-05	1.14126	0.09865	1.27373	0.00047
Ccdc50	NM_026202	2.00279	9.95539e-16	1.60328	1.17231e-15	1.48192	1.00175e-09	1.32928	0.00012
Calr	NM_007591	2.00242	9.48088e-15	1.7449	1.53153e-10	1.39881	0.00043	1.41049	3.46516e-07
Klra8	NM_010650	2.00104	7.16546e-15	1.72616	1.14218e-06	-1.19154	0.11198	1.20153	0.00902
Ccl9	NM_011338	2.00059	5.97926e-10	2.34388	3.64808e-22	3.25727	1.95003e-21	3.64363	8.41356e-38
Lag3	NM_008479	2.00001	1.33837e-13	1.1318	0.29979	1.33081	0.00193	1.53804	6.0659e-08
Glul	NM_008131	-2.0003	2.99509e-06	-1.46989	0.00017	-1.38963	7e-05	-1.40678	6.00748e-06
Fmo1	AK034946	-2.00033	7.44317e-11	-1.52115	0.00539	-1.43422	2e-05	-1.41849	0.00758
Gm106	XM_129714	-2.00046	2.14041e-22	-1.38551	2.32472e-07	-1.31555	2e-05	-1.34813	1.37653e-07
Col12a1	CB589618	-2.0011	1.56773e-27	-1.48678	6.2851e-12	-1.35413	3.46517e-07	-1.53587	4.54872e-08
Lrrn3	NM_010733	-2.00134	2.14888e-10	-1.69742	9.67449e-12	-1.57464	0.00014	-1.53792	6.63889e-11
Ebf1	NM_007897	-2.00135	1.89691e-16	-1.81067	8.51241e-09	-1.49623	0.00023	-1.39436	4.48341e-09
Rkhd3	XM_620516	-2.00143	1.24874e-17	-1.63831	0.00061	-1.10961	0.30991	-1.21672	0.0016
Arl15	AK038076	-2.00153	5.79818e-09	-1.61404	1.75837e-08	-1.21498	0.04483	-1.71154	2.05549e-15
Sned1	NM_172463	-2.00187	3.36275e-18	-1.58346	1.32902e-07	-1.20039	0.04789	-1.17385	0.08714
Adamts5	AK046558	-2.0022	3.17588e-13	-1.47326	0.0062	-1.22006	0.05251	-1.43007	1e-05
Cdh22	NM_174988	-2.00255	2.1671e-16	-1.67074	2.08765e-21	-1.22836	0.00232	-1.01233	0.84485
Armc4	XM_619518	-2.00282	2.25187e-25	-1.20101	0.26876	-1.16419	0.36013	-1.39536	0.00162
Rbms3	NM_178660	-2.00346	6.78058e-13	-1.42351	3.00118e-07	-1.47106	4.07746e-11	-1.54832	7.98599e-07
Mlh3	BC079861	-2.00364	1.46e-08	-1.34524	0.01678	-1.41881	0.00165	-1.37646	0.00056
Wbscr27	NM_024479	-2.00416	8.4337e-15	-1.55159	1.0612e-06	-1.58818	6.14461e-10	-1.4147	0.00014
A_52_P404979		-2.00436	8.91087e-23	-1.45738	5e-05	-1.54259	5.86957e-07	-1.62768	8.26644e-10
Dgkh	AK031069	-2.00455	1.05897e-18	-1.48238	2e-05	-1.64851	0.00076	-2.05069	7.01187e-20
0710008K08Rik	AK039642	-2.00526	4.52782e-12	-1.42457	0.00165	-1.60056	0.00014	-1.58438	6.36286e-07
Zbtb20	AK040552	-2.00582	2.38492e-08	-1.55913	1.66551e-13	-1.85152	5.67564e-17	-1.57207	0.00034
Eif4ebp2	NM_010124	-2.00621	1.17128e-14	-1.51409	0.00044	-1.56089	0.00752	-1.65425	2.55317e-12
Za20d1	NM_001025613	-2.00648	1.07053e-26	-1.34012	2.02603e-07	-1.89354	8.1536e-08	-1.87164	1.56256e-23
Sult1c2	NM_026935	-2.00668	4.49959e-10	-1.87413	9.78537e-19	-1.7388	2.99772e-17	-1.28025	0.00133
Npnt	NM_033525	-2.00763	6.28235e-32	-1.71975	1.95414e-08	-1.78042	3e-05	-1.61177	3.0667e-12
BC018465	NM_144890	-2.00805	1.13028e-28	-1.66866	6.21002e-10	-1.19478	0.00299	-1.1824	0.01761
Col4a6	BC004800	-2.0086	2.8999e-31	-1.63835	3.86595e-09	-1.4479	2e-05	-1.35966	1e-05
Gm128	NM_001024841	-2.00862	2.15885e-14	-1.60048	3.65558e-06	-1.22657	0.05365	-1.04678	0.72974
AK052949	AK052949	-2.00928	9.73772e-11	-1.54686	3.59307e-08	-1.47383	0.00059	-1.60886	1.0991e-12
Dnm3	NM_172646	-2.01017	1.59564e-06	-1.51773	1.46185e-13	-1.55594	2e-05	-1.65934	9.20868e-07
Rcor3	NM_144814	-2.01067	3.14692e-36	-1.56817	1.50525e-09	-1.30159	0.03988	-1.17657	0.33581
Actc1	NM_009608	-2.01081	2.89356e-10	-1.50662	1.08113e-08	-1.41657	1e-05	-1.28643	3e-05
C030002C11Rik	BC058715	-2.01085	1.5228e-14	-1.42578	0.04217	-1.74272	1e-05	-1.69536	0.00031
Six4	AB024689	-2.01157	3.98475e-10	-1.61868	5.79752e-06	-1.3912	0.00023	-1.42599	1.91547e-08
E030030I06Rik	AK081016	-2.01178	7e-05	-1.36682	0.00309	1	1	-1.04768	0.74121
E030046B03Rik	AK053225	-2.01201	1.46357e-17	-1.43574	3.50957e-07	-1.41202	8e-05	-1.91024	2.67881e-20
Lrrc3b	NM_146052	-2.01214	4.32192e-06	-2.11099	2.0643e-20	-1.63467	1.92638e-07	-1.4081	1.0646e-08
Eif2c4	NM_153177	-2.01304	7.7417e-07	-1.4479	1e-05	-1.36834	0.00095	-1.46772	6.65581e-10
Cntfr	NM_016673	-2.01318	7.78184e-11	-1.63919	8.80035e-09	-1.92526	3.87751e-16	-2.29421	5.20014e-28
Rock1	NM_009071	-2.01337	0.00021	-1.39011	0.05075	-1.4442	0.10153	-1.95152	1.2213e-06
Magi3	AK042078	-2.01359	0.00255	-1.62505	0.00491	-1.48659	0.08605	-1.60344	0.00039
Ankrd35	XM_289760	-2.01415	5.89813e-12	-1.52987	3.09849e-14	-1.32481	0.00012	-1.301	0.0039
AA718294	AA718294	-2.01429	6.49306e-09	-1.57492	2.56184e-12	-1.37639	0.00049	-1.29462	2e-05
Calcrl	NM_018782	-2.01459	1.08942e-24	-1.41379	0.0053	-1.29538	0.00253	-1.50256	1.68287e-06
Edil3	NM_010103	-2.01479	2.86194e-06	-1.77425	9.55115e-07	-1.35191	0.00235	-1.20715	0.01534
Trdn	AF223417	-2.01518	8.2372e-09	-1.55682	7.90862e-08	-1.46081	8.24587e-06	-1.38993	2e-05
2310040G07Rik	AK009722	-2.01541	1.98589e-16	-1.65817	6.24144e-13	-1.41986	2e-05	-1.73697	3.7445e-07
Rpl41	BB344124	-2.0157	7.35191e-17	-1.53298	1.42202e-13	-1.56186	6.06437e-14	-1.98758	0.00063
4933406C10Rik	AK016682	-2.01581	2.0487e-17	-1.7637	1.10729e-15	-1.61826	0.00015	-1.30591	0.00066
Lrrc8b	XM_485656	-2.01647	9.05924e-12	-1.64535	5.583e-12	-1.37421	0.00284	-1.20536	0.00517
Zc3h6	AK013610	-2.01675	1e-05	-1.61489	0.00074	-1.33282	0.03111	-1.31539	0.03128
1500026H17Rik	XM_483938	-2.01696	8.01612e-27	-1.73563	1.54066e-06	-1.17933	0.02337	-1.07687	0.15013
Inpp4b	XM_134427	-2.01758	1.03393e-12	-1.80129	4.83126e-14	-1.47849	1e-05	-1.20518	0.035
Trim7	NM_053166	-2.01812	2e-05	-1.72142	1.43424e-17	-1.23319	0.03715	-1.02681	0.73678
Dusp7	NM_153459	-2.01815	3.55626e-17	-1.64371	2e-05	-1.66737	0.00197	-1.52661	6.38461e-09
Rnf127	AK077530	-2.01822	2.54067e-12	-1.29334	0.00175	-1.1695	0.07677	-1.51983	0.00111
8030451A03Rik	AK005815	-2.01853	9.67267e-18	-1.66319	9.69383e-06	-1.11604	0.22607	-1.05924	0.50571
Rnf113a2	AI595224	-2.01877	4e-05	-1.71036	0.00117	-1.13307	0.37728	-1.70763	4.82713e-07
Whrn	AK039124	-2.01904	1.55263e-11	-1.53544	9.32327e-06	-1.26184	0.30952	-1.27572	0.00422
Adamts10	BC082773	-2.01912	1.8175e-11	-1.86725	4.10438e-27	-1.5048	1e-05	-1.21255	0.00048
A_51_P499979		-2.01926	6.11857e-14	-1.59596	9.02647e-15	-1.59027	2.04823e-16	-1.43788	0.00044
Tshz2	AK046877	-2.01972	7.12354e-19	-1.45191	3.94419e-07	-1.10137	0.25534	-1.19688	0.04657
Wwc2	AK036263	-2.01994	9.61772e-12	-1.54161	1.51616e-06	-1.39523	5.61517e-07	-1.2385	0.03554
C130094E24	AK082012	-2.02056	1.27119e-10	-1.87863	5.02817e-16	-1.67229	2.31154e-07	-1.27116	0.00231
Qser1	BC021511	-2.02061	1.20281e-09	-1.67949	3.17147e-17	-1.1999	0.00695	-1.22648	0.00478
B330016D10Rik	NM_177163	-2.02084	8.04442e-08	-1.59167	3.42284e-07	-1.32116	0.00314	-1.35352	0.00758
Apobec2	NM_009694	-2.02119	9.69027e-07	-1.74914	1.14729e-12	-1.38075	0.0022	-1.17085	0.13028
Syne1	NM_022027	-2.0219	5.58707e-14	-1.77653	1.06679e-24	-1.88829	7.93024e-11	-1.70771	5.95312e-16
Odz4	NM_011858	-2.02325	3.3949e-30	-2.07843	1.6923e-28	-1.46846	1.33728e-06	-1.6846	3.02881e-06
Hist2h2aa2	AK028129	-2.02337	4.54801e-12	-1.36979	5.10148e-06	-1.13043	0.10734	-1.19817	0.00695
Rpl3l	NM_025425	-2.02352	1.2752e-09	-1.47787	4e-05	-1.1624	0.13797	-1.0085	0.95475
Dscr1l1	NM_207649	-2.02466	2.25479e-09	-1.42001	7e-05	-1.47112	6e-05	-1.26607	0.00036
2810055G20Rik	AK034975	-2.02475	7.59965e-06	-1.53722	0.00205	-1.47432	0.04664	-1.34542	0.00094
Epb4.1	AK019923	-2.02477	1.21034e-10	-1.40303	0.00092	-1.51624	9.10338e-08	-2.34637	1.12275e-31
6330416L11Rik	NM_027518	-2.02486	5.74081e-12	-1.50882	5.69866e-07	-1.1273	0.04824	-1.29942	0.00532
Mcoln3	AK033008	-2.02535	3.11601e-09	-1.20746	0.01032	-1.17626	0.00735	1.05636	0.60167
Lphn3	NM_198702	-2.0258	2.35788e-07	-1.64433	3.55718e-09	-1.7095	4.80876e-14	-1.3608	0.0092
Lmod3	AK030676	-2.02586	1.49596e-19	-1.63363	2.81337e-08	-1.47497	6.05307e-10	-1.15201	0.0941
Dcdc5	NM_177844	-2.02658	2.54566e-10	-1.5823	0.00061	-1.20653	0.19206	-1.35558	4.09935e-07
Cyp39a1	NM_018887	-2.02661	4.58781e-12	-1.54645	3.16975e-06	-1.33107	0.00052	-1.42045	0.01027
Srpx2	NM_026838	-2.02744	9.22164e-33	-1.62084	5.22949e-11	-1.39549	7.90069e-07	-1.20692	0.00046
Snx25	BC054725	-2.02816	5.3743e-32	-1.52797	7.22278e-12	-1.51479	4.7466e-08	-1.45522	9e-05
Rora	AK087905	-2.02846	1.27671e-10	-1.50105	0.00067	-1.54938	6.60352e-12	-1.75378	4.07066e-06
AK038867	AK038867	-2.02961	2.60296e-18	-1.63154	1.59531e-07	-1.57305	1.22325e-08	-1.31176	4.1522e-06
Ube4a	AK172893	-2.03113	6.96208e-24	-1.59255	4.08374e-13	-2.26438	2.39912e-08	-2.07745	1.21648e-10
Nr4a2	NM_013613	-2.03134	2.54171e-35	-1.47664	2.15292e-10	-1.58054	8.36379e-10	-1.44382	6e-05
Syne2	AK052521	-2.03149	5.63733e-23	-1.55389	2.7645e-13	-1.98964	1.53565e-10	-1.54816	1e-05
AI450540	NM_145505	-2.03161	2.86385e-22	-1.72828	6.9305e-06	-1.50804	0.02007	-1.4664	1.05323e-10
BC025575	NM_199200	-2.03164	2.59224e-07	-1.80891	9.89073e-06	-1.25563	0.13305	-1.1237	0.0263
Paqr6	NM_198410	-2.03258	6.38843e-14	-1.54031	1.92471e-06	-1.37898	0.00527	-1.35567	0.00181
Gpt1	NM_182805	-2.03282	2.12009e-13	-1.52959	1.27101e-12	-1.43513	2.27e-12	-1.30605	0.00139
Hspb7	NM_013868	-2.03307	0	-1.47674	2.25542e-11	-1.50142	1.25223e-09	-1.38759	9.33753e-06
Cpb1	NM_029706	-2.03348	2.99629e-09	-1.90372	6.69296e-24	-1.53361	1.35541e-12	-1.17236	0.00279
Angptl2	NM_011923	-2.0335	5.71616e-21	-1.71704	5.50266e-19	-1.6345	2.41335e-15	-1.24407	5e-05
A930004K21Rik	NM_172673	-2.03456	8.72041e-11	-1.74055	0.00121	-1.27672	0.06315	-1.20557	0.158
Bdh2	NM_027208	-2.03456	2.54944e-19	-1.57063	2e-05	-1.34828	0.00288	-1.25502	0.00115
Ankrd26	XM_132817	-2.0346	1.69473e-07	-1.53178	0.00025	-1.53647	0.0221	-1.75112	1.0282e-12
Ankk1	NM_172922	-2.03553	9.45986e-21	-1.75275	2.72202e-21	-1.36936	0.0009	-1.38684	0.01386
2310010J17Rik	BU945741	-2.03565	3.81503e-18	-1.60572	3.35482e-17	-1.3764	8.92407e-09	-1.25268	8e-05
Fmo2	AK009224	-2.03572	5.7986e-07	-1.49373	2.26282e-08	-1.45823	3e-05	-1.54103	0.00164
Tat	NM_146214	-2.03658	1.00144e-23	-1.22246	0.00071	-1.26142	0.0027	-1.71119	3.65699e-21
Col8a1	NM_007739	-2.03663	1.06608e-23	-2.13522	5.56525e-28	-1.04546	0.5686	1.0774	0.32552
5730406M06Rik	XM_283936	-2.0367	1.88931e-07	-1.47146	0.00253	-1.48019	0.00953	-1.84583	9.60144e-30
C030010B13Rik	AK029171	-2.03718	7.92707e-16	-1.74158	7.16829e-15	-1.45707	5.32322e-06	-1.50258	4.7863e-06
Scrn1	AK129084	-2.0372	1.85008e-09	-1.60857	9e-05	-1.42062	0.00018	-1.13536	0.01999
Zfp641	NM_173769	-2.03738	6.10396e-14	-1.59375	8.76237e-15	-1.34221	6e-05	-1.46924	7.14163e-06
NAP033385-1		-2.03758	2.83015e-23	-1.54555	3.48682e-06	-1.3018	9.2193e-07	-1.72008	1.39509e-11
Rbm5	NM_148930	-2.03862	0.00171	-1.63327	0.01522	-1.68059	0.02197	-1.9593	5.97917e-08
Myo18b	AK077135	-2.03906	8.01758e-20	-1.67377	1.51603e-14	-1.51161	2.10794e-11	-1.28642	0.00067
Cyp2b13	NM_007813	-2.03999	1.4606e-09	-1.52209	2.85474e-11	-1.47347	0.00026	-1.33353	9.02935e-06
2900064F13Rik	AK013749	-2.04024	5.28229e-06	-1.52392	2.20334e-12	-1.06575	0.33845	1.04515	0.54671
Acoxl	NM_028765	-2.04043	5.90446e-28	-1.66694	9.58457e-14	-1.78747	1.149e-13	-1.63078	8.71682e-19
Bank1	XM_143587	-2.0412	3.34242e-08	-2.27391	3.90769e-15	-1.72877	5.1553e-09	-1.11997	0.41684
Fmo5	NM_010232	-2.04136	1.1811e-19	-1.65362	9.46111e-17	-1.44694	1.26744e-10	-1.23912	0.00018
Cpm	AK017670	-2.0415	3.79307e-09	-1.6892	1.97304e-07	-1.50767	0.00039	-1.17949	0.08288
X57780	X57780	-2.04258	1.6234e-09	-1.41215	0.00023	-1.12403	0.06738	-1.03295	0.66736
Efnb2	NM_010111	-2.04333	1.37443e-27	-1.65364	1.23189e-13	-1.36183	3.81732e-08	-1.48606	3.59603e-10
5330430C04Rik	AK019921	-2.04356	1.19456e-26	-1.44446	3e-05	-1.39026	1.16987e-07	-1.25282	0.00081
Mgll	NM_011844	-2.04392	1.37225e-15	-1.70183	3.85137e-12	-1.30815	0.00063	-1.20392	0.00125
Abca1	NM_013454	-2.044	4.40505e-22	-1.74089	1.27052e-06	-1.22276	0.02308	-1.49224	5e-05
Asf1a	NM_025541	-2.04422	1.43919e-13	-1.41483	7.14975e-09	-1.48016	5e-05	-1.84353	6.79241e-20
Atg4c	AK038463	-2.04494	4.6232e-09	-1.36937	0.00058	-1.3346	0.0462	-1.58016	1.12084e-08
Cst11	NM_030059	-2.04505	6.10045e-17	-1.56515	0.00063	-1.15267	0.12401	-1.07543	0.78038
A730009E18Rik	AK042600	-2.04508	1.44376e-26	-1.58939	3e-05	-2.00871	4.53582e-28	-1.92082	4.13141e-18
Aytl2	NM_145376	-2.04573	3.55784e-19	-1.72455	1.24659e-11	-1.58572	7.73864e-06	-1.34768	0.03165
Tmed6	NM_025458	-2.04665	1.21745e-12	-1.68872	1.79855e-14	-1.09417	0.21806	1.15576	0.23574
Slc45a4	XM_128267	-2.04734	8.677e-20	-1.52676	9e-05	-1.17113	0.13545	-1.15526	0.04318
D630004D15Rik	AK052608	-2.04837	1.80877e-08	-1.70056	0.00042	-1.58786	0.00038	-1.44601	0.0001
Dgat2	NM_026384	-2.04843	7.92323e-17	-1.44708	5.26458e-09	-1.11017	0.11078	-1.44797	1.24853e-07
4732457N14	AK076353	-2.04857	9.82893e-07	-1.67275	7.6718e-09	-1.79264	2.39538e-09	-1.42304	0.02102
D730040F13Rik	AK085364	-2.04876	3.24149e-10	-1.68325	0.00075	-1.91141	6e-05	-1.72975	7e-05
B930006L02Rik	NM_178764	-2.04895	3e-05	-1.5908	0.00011	-1.42129	0.04975	-1.57421	1.14287e-09
Myo3b	AK033795	-2.04942	2.68613e-23	-1.33993	0.00386	1.0694	0.31706	1.02622	0.62519
Cpn1	AK033629	-2.0498	1.85974e-17	-1.62995	1.52345e-10	-1.41814	0.00155	-1.11539	0.42436
Ppm1l	BC060120	-2.05038	4.78622e-27	-1.40903	6.0684e-10	-1.42477	0.00015	-1.37957	7.41128e-08
Pank3	NM_145962	-2.05084	2.39864e-08	-1.52671	3.89029e-11	-1.25779	0.0448	-1.81024	1.66104e-19
Sgtb	NM_144838	-2.05109	3.82818e-30	-1.63754	4.1902e-06	-1.58713	0.00154	-1.83574	1.74628e-19
Notch4	NM_010929	-2.05125	1.51674e-15	-1.65867	1.24721e-11	-1.3743	1.94072e-08	-1.31649	1.09582e-07
Nuak1	AK020957	-2.05135	4.94753e-08	-1.66582	4.93699e-06	-1.69114	2.56263e-09	-1.51373	0.02934
Cdc42bpg	XM_140553	-2.05154	6.39967e-15	-1.62268	0.00033	-1.76284	0.00202	-1.46443	3.50722e-13
Uox	NM_009474	-2.05234	3e-05	-1.28813	0.00734	1.09067	0.42854	-1.04707	0.54992
Plscr4	AK035454	-2.05315	0.00033	-1.4425	0.00718	-1.36754	0.01035	-1.70237	0.0001
Pdss2	AK082584	-2.05318	3.38168e-09	-1.44438	1.52771e-08	-1.44401	0.02815	-1.65329	5.38475e-16
Txnrd3	NM_153162	-2.0539	3.49015e-24	-1.5781	7.40533e-10	-1.41311	2.28406e-10	-1.20887	0.03502
Zbtb38	NM_175537	-2.05408	2.50885e-29	-1.49024	0.00012	-1.44171	0.01439	-1.49955	6.72971e-08
Rasgef1a	XM_132762	-2.05451	1e-05	-1.57414	0.0039	-1.3455	0.04203	-1.10868	0.28298
3222401M22Rik	BC038341	-2.0558	1.93131e-17	-1.8727	4.98454e-26	-1.39391	2.00848e-07	-1.22831	0.00125
A330103N21Rik	AK087668	-2.05632	5.84758e-19	-1.49644	7.62078e-13	-1.52805	1.1809e-07	-1.6142	5.97355e-20
1190002H23Rik	NM_025427	-2.05665	8.03341e-17	-1.45719	0.00026	-1.45623	1.63447e-07	-1.92559	2.16758e-11
Vwf	NM_011708	-2.05696	2.54332e-08	-1.88743	2.88658e-13	-1.21342	0.001	-1.09278	0.26388
Zfp397	AK078454	-2.057	6.04502e-23	-1.53302	6.8598e-08	-1.39079	0.00643	-1.43785	3.93043e-06
Zbtb4	AK173196	-2.05787	5.46149e-08	-1.6296	0.00082	-1.56184	0.00408	-1.42375	0.01146
2610301F02Rik	XM_619767	-2.0585	5.2946e-18	-1.45326	3.12793e-11	-1.61528	6.50307e-13	-1.72576	9.41956e-07
Npr2	NM_173788	-2.05861	1.4771e-10	-1.70755	5.10237e-07	-1.64117	0.00011	-1.39305	0.00107
D230034L24Rik	AK084380	-2.05871	5.13501e-19	-1.69086	7.07745e-18	-1.33225	1e-05	-1.61137	1.01799e-09
Cd209d	NM_130904	-2.05914	9.85213e-14	-1.28027	0.01891	1.68331	8.81503e-06	2.18845	1.32485e-10
Cacna2d2	NM_020263	-2.05972	2e-05	-1.64228	1.09582e-09	-2.2771	2.72383e-26	-1.41708	4.06683e-08
Acacb	BC022940	-2.05981	8e-05	-1.6134	0.00021	-1.23346	0.07645	-1.22111	0.02651
Syde2	AK036201	-2.05987	1.45892e-09	-1.41857	1.0141e-08	-1.74514	2.23291e-17	-1.53866	4e-05
Irs1	NM_010570	-2.06	3.73495e-06	-1.85642	3.63832e-11	-1.41589	0.00247	-1.53199	0.00151
Cd36	NM_007643	-2.06022	2.71131e-11	-1.73741	1.07584e-10	-1.21798	0.00705	-1.36489	0.09054
Fbln5	NM_011812	-2.06068	1.56372e-16	-1.77447	3.68712e-20	-1.58015	9.71965e-09	-1.46545	0.00113
BC024137	BC024137	-2.06141	2.54601e-08	-1.54181	0.00039	-1.40845	0.00278	-1.15374	0.13794
Chd5	XM_196334	-2.06363	2.01833e-07	-1.59483	4.83936e-09	-1.42594	1.82233e-09	-1.2773	5.96777e-06
Npb	NM_153288	-2.06446	2.58792e-16	-1.59081	0.00027	-1.13571	0.21183	-1.00383	0.97498
A730011L01Rik	NM_177394	-2.06476	6.92219e-30	-1.61782	2.13931e-08	-1.3748	0.00329	-1.16283	0.02551
Penk1	NM_001002927	-2.06516	6.39741e-13	-1.7514	5.55528e-18	-1.23785	0.00025	-1.35419	5.81018e-08
AK031552	AK031552	-2.06522	1.41559e-07	-1.60131	0.00053	-1.60022	0.00029	-1.59103	0.00012
Fbxl7	AK084297	-2.06541	3.91106e-17	-1.53071	3.47731e-07	-1.54721	0.00015	-1.56506	2.43763e-06
Igsf4a	NM_207676	-2.06578	4e-05	-1.49113	0.00718	-1.47472	0.00331	-1.41078	0.02114
C030045D06Rik	XM_484831	-2.06579	2.00499e-21	-1.63027	2.35696e-06	-1.36572	8e-05	-1.50067	5.00208e-07
Ephx1	NM_010145	-2.06601	4.20301e-07	-1.82775	7.59476e-14	-1.66041	3.22059e-11	-1.261	0.00337
Mtmr12	AK047347	-2.06652	2e-05	-1.65076	0.00019	-1.35984	0.00468	-1.33645	0.00779
Myrip	NM_144557	-2.06656	5.1365e-22	-1.29785	0.00033	1.07578	0.31291	1.00985	0.89513
Cav1	NM_007616	-2.06666	7.32715e-14	-1.77885	1.17601e-09	-1.56996	4.01917e-07	-1.49043	1.6891e-07
Mup3	NM_010845	-2.06696	6.00273e-07	-1.2222	0.04314	-1.00795	0.95265	-1.13143	0.06253
Mosc2	AK078650	-2.06793	1.29392e-15	-1.51726	0.00183	-1.50253	0.08043	-1.76885	8.43467e-16
Ecm2	NM_001012324	-2.06831	1.44422e-13	-1.50115	7e-05	-1.91107	9.17919e-09	-1.75595	3.28284e-17
Atp6v0a4	NM_080467	-2.06859	3e-05	-1.59459	1e-05	-1.15986	0.3356	-1.01192	0.8692
Smg6	NM_001002764	-2.06931	1.04853e-13	-1.67771	8e-05	-1.64585	0.00223	-1.73692	2.36795e-07
Epb4.1l4a	AK048751	-2.06983	2.9967e-38	-1.60962	6.8477e-13	-1.71753	6.31826e-16	-1.60139	3.16938e-14
AK084228	AK084228	-2.06991	0.00019	-1.68435	1.80541e-10	-1.98458	0.00086	-2.24091	1.41343e-07
C530008M07Rik	AK087311	-2.07123	5.91144e-11	-1.52569	0.00214	-1.12102	0.33592	-1.22001	0.36757
Pcdh9	XM_139187	-2.0713	9.9764e-08	-1.25162	0.04544	-1.17495	0.22156	-1.09199	0.41983
4921533L14Rik	AK173166	-2.07157	5.01527e-27	-1.6119	6e-05	-1.15309	0.08775	-1.24588	5e-05
5730405I09Rik	AK014507	-2.07251	8.68717e-11	-1.58135	3.08834e-12	-1.28652	0.00318	-1.22975	0.00011
Abcb1a	NM_011076	-2.07261	8.82194e-17	-2.04172	7.53498e-29	-1.54186	0.00053	-1.5014	8e-05
BB311275	BB311275	-2.0727	1.65522e-10	-1.58135	1.66322e-13	-1.37458	6e-05	-1.65459	0.00061
9430073N08Rik	AK020485	-2.07309	1.3819e-27	-1.65505	1.27947e-18	-1.37267	4.13347e-06	-1.38081	2.84077e-09
1810044A24Rik	AK029106	-2.07372	3.77426e-17	-1.45115	4.20298e-07	-1.2267	0.00142	-1.22136	0.01304
Sec14l3	NM_001029937	-2.07408	1.25407e-12	-1.54087	0.00457	-1.72363	0.00036	-1.77817	0.00022
C630007B19Rik	NM_182808	-2.0745	5e-05	-1.72048	0.00038	-1.44401	0.00106	-1.26588	0.0686
Ankrd44	AK038343	-2.07469	1.492e-06	-1.603	0.00257	-1.51608	0.01082	-1.79502	2.13189e-08
Nr3c2	AK048651	-2.07509	1.71919e-33	-1.39715	5.00961e-07	-1.53925	0.00032	-1.37939	0.002
Ear3	NM_017388	-2.07544	9.15534e-09	-1.89921	1.042e-08	-1.56057	0.00475	-1.12493	0.21434
NAP053619-1		-2.07566	2.29742e-06	-1.44697	0.00022	-1.46262	0.00034	-1.39643	0.00498
Cox6a2	NM_009943	-2.07608	5.01936e-15	-1.54639	8.13785e-06	-1.24894	0.01343	-1.04205	0.48505
Ttc6	XM_126988	-2.07612	1.18899e-18	-1.6262	4.27388e-15	-1.296	0.00018	-1.26759	0.02793
LOC435864	AK085682	-2.07616	1.46296e-13	-1.56045	0.0065	-1.49835	0.00741	-1.8887	2.74431e-12
BC016201	NM_145601	-2.07632	2.98172e-22	-1.82204	5.92102e-13	-1.24581	0.00819	-1.25108	0.0002
4930504E06Rik	AK053118	-2.07651	0.00011	-1.50125	0.02515	-1.42528	0.1026	-1.3946	2e-05
Ccbl1	NM_172404	-2.07726	5.91774e-25	-1.71681	5.76302e-24	-1.2419	9e-05	-1.21696	0.01744
Frmd6	NM_028127	-2.07751	1.76954e-35	-1.51408	1.7414e-11	-1.35125	2.22758e-06	-1.54109	8.53956e-11
Lrrc24	NM_198119	-2.07801	4.28732e-15	-1.86968	2.63242e-07	-1.41289	0.00087	-1.33968	0.00012
Cdkl5	AK052380	-2.07829	1.57304e-21	-1.72058	2.659e-13	-1.90635	3e-05	-1.41241	1.00543e-09
Txnip	NM_023719	-2.07848	1.57824e-09	-1.81184	3.30365e-13	-1.79028	7.10725e-24	-1.46542	9.65906e-13
Asb15	AK079418	-2.07852	6.37718e-12	-1.36818	0.0005	-1.4347	2.26762e-06	-1.46554	0.00606
2700045P11Rik	XM_489512	-2.08022	2.6551e-13	-1.47611	0.00033	-1.15502	0.34004	-1.36661	0.00055
Bmx	NM_009759	-2.08078	2.46559e-22	-1.7279	4.10621e-11	-1.17107	0.04477	-1.13953	0.02151
Ccdc15	XM_146705	-2.08202	1.92848e-06	-1.38193	0.05411	-1.34924	0.05322	-1.49311	2.27382e-14
Trmt12	NM_026642	-2.08312	9.85096e-24	-1.88103	8.40707e-22	-1.78778	6.1833e-08	-1.35054	3.12415e-07
Ccdc85a	AK173298	-2.08413	2.80572e-10	-1.67332	8.14999e-14	-1.20172	0.00032	1.04163	0.68813
Myh14	NM_028021	-2.08488	1.51171e-23	-1.63331	3.07551e-12	-1.63564	4.02203e-08	-1.58957	3.94165e-11
Spt2	NM_009268	-2.08505	1.02136e-14	-1.41556	1.68254e-07	1.41917	4.13009e-09	1.32965	0.00236
Sbf2	AK048952	-2.08507	5.34209e-35	-1.50303	0.00417	-1.28673	6e-05	-1.57977	0.00349
Car3	AK017227	-2.08562	4.73823e-06	-1.98506	1.4024e-08	-1.82272	6.63675e-13	-2.29824	2.34148e-08
Adam3	NM_009619	-2.08647	3.66034e-12	-1.42289	2.70188e-09	-1.27127	4e-05	-1.37398	0.00013
Eltd1	NM_133222	-2.0876	6.5001e-19	-1.6815	3.31992e-13	-1.33632	0.00179	-1.33446	0.0009
Sh3rf1	AK008634	-2.08778	1.65801e-15	-1.58572	0.00023	-1.43753	0.00018	-1.39615	1.19349e-09
Pir	NM_027153	-2.08794	8.55455e-07	-1.85922	6.22005e-09	-1.44313	0.00112	-1.40824	0.00916
Pcdh17	AK045478	-2.08811	6.8302e-15	-1.92601	6.5393e-25	-1.09952	0.21882	-1.04074	0.59719
6330514A18Rik	NM_183152	-2.08853	2.20414e-06	-1.78809	8.42548e-07	-1.4898	0.00076	-1.47576	0.00011
5430405G24Rik	AK084888	-2.08904	3.45188e-10	-1.54973	1.89074e-06	-1.54751	0.00053	-1.54249	4.61004e-08
A630051L19Rik	AK053470	-2.08911	7.99378e-08	-1.65918	8.29839e-15	-1.42813	1.76337e-08	-1.49328	5.66596e-11
Prkcz	BC072590	-2.0894	4.59578e-17	-1.56482	1e-05	-1.4833	4.64653e-06	-1.24291	0.02643
Klhl24	AK004187	-2.08991	4.38305e-09	-1.56391	1.25156e-06	-1.38181	0.00879	-1.29918	0.00014
Arvcf	NM_033474	-2.09116	7.59728e-09	-1.82299	1.06078e-13	-1.62532	2.58645e-12	-1.40382	7e-05
Lpin2	AK033959	-2.09174	3.03994e-23	-1.49322	1.36012e-07	-2.15035	1.54742e-16	-1.6479	5.06287e-09
2900069M18Rik	AK013759	-2.09208	1.48055e-38	-1.59749	1.55694e-10	-1.50828	0.00013	-1.82098	5.53025e-22
Usmg4	NM_031401	-2.09344	1.71418e-09	-1.70952	1.26872e-20	-1.62744	1.84502e-09	-1.47988	0.00013
Cav2	NM_016900	-2.09395	6.57465e-20	-1.58904	2.75364e-11	-1.21568	4e-05	-1.65152	8e-05
Epas1	AK087208	-2.09419	7.16523e-20	-1.49947	2.02329e-09	-1.48239	2.03644e-11	-1.11099	0.06279
Gas6	NM_019521	-2.0942	9.86927e-24	-1.78218	2.70819e-25	-1.6539	7.68367e-06	-1.50218	1e-05
E330018D03Rik	NM_177133	-2.09484	2.64305e-23	-1.51536	7.45843e-15	-1.56238	0.00021	-1.75439	3.66677e-17
Gucy1a3	NM_021896	-2.09495	1.6411e-35	-1.88025	5.06609e-13	-1.24968	0.00058	-1.2442	0.00138
Prkg2	NM_008926	-2.09556	8.95506e-14	-1.72061	0.00021	-1.70229	0.00122	-1.56031	3.58852e-16
3110021N24Rik	AK011275	-2.0957	2.44972e-06	-1.59295	4.77077e-12	-1.29539	0.068	-1.13136	0.27608
Sln	NM_025540	-2.0964	1.05638e-38	-1.74928	2.33911e-24	-1.71229	3.00039e-20	-1.3289	4.66095e-08
9430079B08Rik	AK035049	-2.09656	2.00329e-23	-1.43776	1.37909e-10	-1.382	1.1031e-06	-1.3558	0.00426
6430527G18Rik	NM_145836	-2.09662	3.49533e-23	-1.53797	9e-05	-1.25018	0.02709	-1.54909	0.01522
C330020G15Rik	AK082796	-2.09714	2.03556e-09	-1.77031	1.6535e-15	-1.31637	0.00017	-1.31194	2e-05
1110020A21Rik	XM_148821	-2.09729	4.05607e-29	-1.58552	2.84079e-07	-1.31081	0.00708	-1.33614	4e-05
Calca	BC028771	-2.0977	7.71933e-17	-1.30717	0.0479	1.23673	0.09312	-1.36587	0.00085
D14Ertd171e	NM_177814	-2.09805	7.58221e-09	-1.34486	0.00852	-1.40919	0.00733	-1.4401	8.58722e-07
Itga8	NM_001001309	-2.09889	8.90896e-17	-1.80423	2.02834e-19	-1.92502	2.41819e-13	-1.56636	9.61983e-12
Rgma	NM_177740	-2.0995	5.20845e-27	-1.61258	8.26385e-14	-1.44494	2.3787e-10	-1.36625	5.18398e-07
Tmtc2	AK048332	-2.09962	6.44501e-10	-1.79893	1.03145e-11	-1.72184	0.00106	-2.18681	2.32625e-08
Cdh5	NM_009868	-2.09968	1.57095e-35	-1.92471	2.76909e-29	-1.57639	1.33087e-07	-1.68448	0.00178
Rusc2	AK053542	-2.10014	1.20846e-23	-1.7812	1.70483e-18	-1.6483	1.06589e-20	-1.44128	2.45694e-09
Vpreb3	NM_009514	-2.10018	1.77381e-09	-1.76515	6.06023e-07	-1.39028	0.00283	-1.05477	0.67701
Gnal	NM_010307	-2.10019	2.71803e-15	-1.66857	2.13133e-13	-1.48275	0.00011	-1.54185	1e-05
4632423N09Rik	NM_134030	-2.10048	7.68106e-19	-1.65306	1.22556e-17	-1.44705	1.68325e-07	-1.25933	0.00096
Cttnbp2	XM_289703	-2.10063	2.19409e-12	-1.79574	9.83095e-21	-1.40929	1.45295e-07	-1.46088	4.57706e-07
B230218O03	NM_183219	-2.10106	5.1065e-11	-1.78246	2.94817e-17	-1.65535	9.38993e-22	-1.38994	0.00023
Aph1c	NM_026674	-2.10165	2.60574e-24	-1.58367	1.21219e-06	-1.32091	0.01979	-1.29839	0.00033
Hamp2	NM_183257	-2.10186	1.97883e-08	-1.07739	0.70551	1.07513	0.45061	1.14106	0.03535
Mrg1	NM_010825	-2.10222	4.27139e-31	-1.61393	2.51208e-08	-1.15292	0.01347	-1.21966	0.0199
Cldn8	NM_018778	-2.1023	3.13982e-11	-1.91238	2.05271e-29	-1.48506	3.77551e-09	-1.5668	1.08133e-11
D14Abb1e	XM_621365	-2.1023	1.0903e-17	-1.72225	1.70957e-14	-1.69332	4.01478e-06	-1.64441	4.17623e-10
Epm2a	NM_010146	-2.1026	1.73899e-17	-1.3629	7e-05	-1.48842	5.08529e-06	-1.236	0.00083
Pde4d	AK036012	-2.10264	1.19285e-36	-1.69173	8.09543e-14	-1.36163	0.00045	-1.43978	8.85952e-08
Pdzd2	AK087419	-2.10284	1.75905e-12	-1.51176	2.33368e-12	-1.49186	2.93916e-09	-1.08143	0.352
Sspn	NM_010656	-2.10304	5.98266e-18	-1.55857	2e-05	-1.34514	0.00048	-1.17074	0.06025
Lepr	AK084873	-2.10326	1.27039e-19	-1.53879	1.89739e-16	-1.72922	3.01181e-09	-1.2432	0.00023
Kcns3	NM_173417	-2.10466	1.06975e-10	-1.70222	1.98074e-14	-1.27453	0.00488	-1.09481	0.23977
Rprm	NM_023396	-2.10516	2.42309e-20	-1.65011	3.08837e-09	-1.25871	0.00599	-1.16945	0.10039
A_51_P191170		-2.10841	1.80424e-08	-1.84657	1.38031e-21	-1.18192	0.10393	1.04197	0.55168
Tbc1d16	NM_172443	-2.10878	1.19051e-14	-1.73898	1.362e-08	-1.70976	0.00015	-1.36568	1.70446e-06
2900080J11Rik	AK087612	-2.10888	2.49215e-27	-1.49811	1.53335e-11	-1.34982	7.46414e-08	-1.48302	4.53623e-13
Star	NM_011485	-2.10888	1.5459e-34	-1.69431	6.03863e-09	-1.31397	0.06891	-1.58066	4.78122e-14
LOC545391	AK029617	-2.10893	1.62996e-13	-1.30377	2e-05	-1.36128	0.00143	-1.58661	1e-05
Igfbp6	NM_008344	-2.10995	3.4907e-11	-1.56285	2.48554e-10	-1.44207	2.50205e-07	-1.2912	0.00119
Rai16	AK081168	-2.11013	1.11728e-09	-1.68151	9e-05	-1.16709	0.18671	-1.21419	0.03316
6430701C03Rik	NM_175237	-2.11031	8.22003e-06	-1.5364	4.91174e-07	-1.14263	0.09689	-1.26315	0.03796
Ankrd38	NM_172872	-2.11034	1.00695e-15	-1.6492	1.92959e-07	-1.47497	1.12568e-08	-1.24776	0.00563
Lama2	NM_008481	-2.11037	0	-1.71371	6.27948e-29	-1.48229	8.48075e-14	-1.29252	4.41261e-09
4932439K10Rik	NM_153406	-2.11061	6.57448e-15	-1.83163	3.20127e-20	-1.71983	6.8406e-22	-1.54203	1.64435e-07
Nedd4	NM_010890	-2.1131	9.44533e-18	-1.52897	0.00174	-1.56212	0.00821	-1.51981	4.38465e-12
Jarid1a	BC010717	-2.11327	4.0251e-15	-1.61809	1.07867e-06	-1.79792	3e-05	-1.68133	6.11767e-10
TC1515730		-2.11335	2.56792e-23	-1.7606	4.30524e-11	-1.58684	7.98657e-13	-1.40981	8e-05
Nkd2	NM_028186	-2.11358	1.50636e-24	-1.62122	4.05674e-08	-1.24849	0.00431	-1.30488	2.67998e-07
2010003D24Rik	AK008061	-2.11443	2.33277e-24	-1.53238	8.59941e-08	-1.28252	0.00149	-1.2975	0.00083
4921507P07Rik	NM_027564	-2.11537	1.19218e-21	-1.60683	1.71907e-08	-1.34326	0.00324	-1.34046	0.00062
Vldlr	AK036010	-2.11538	8.60324e-27	-1.57438	6.54818e-07	-1.76416	4.76198e-17	-1.77578	2.43745e-14
Dock9	BC057692	-2.11542	2.27374e-11	-1.53206	6.31643e-07	-1.52096	1e-05	-1.46391	2e-05
Plcb1	NM_019677	-2.11555	3.527e-14	-1.84557	2.11703e-14	-1.58831	3.31273e-06	-1.75482	0.00246
Chka	AK014174	-2.11591	3.45588e-06	-1.35216	0.12372	-1.69754	0.00384	-1.95406	3.63052e-22
AK047526	AK047526	-2.11633	5.29466e-27	-1.49417	4.53535e-08	-1.28728	0.0016	-1.27338	1e-05
Slc16a7	AK085398	-2.11645	1.34334e-07	-1.20272	0.18542	-1.21806	0.1605	-1.05891	0.41732
Retn	NM_022984	-2.11674	5.49894e-14	-1.89735	8.10451e-09	-1.35847	0.00352	-1.81449	7.89061e-09
Angptl3	NM_013913	-2.11799	2.00596e-12	-1.5875	2e-05	1.0438	0.63641	1.06954	0.356
Sult1e1	NM_023135	-2.11812	1.70557e-18	-1.82361	1.63429e-11	-2.12739	5.4717e-07	-1.46111	0.00699
Wasl	NM_028459	-2.11883	2.17211e-18	-1.46799	2.78167e-08	-1.42777	1e-05	-1.58114	1.52856e-07
Zfp119	AK047498	-2.11925	3.29377e-34	-1.83691	2.01362e-10	-1.53297	3.94072e-07	-1.46587	0.00028
2300002D11Rik	BC049168	-2.12058	1.40853e-25	-1.53704	1.17164e-14	-1.5415	1.14703e-14	-1.35449	3.54248e-06
Cmya3	NM_001024618	-2.12119	6.1542e-18	-1.77448	3.00666e-07	-1.43291	1e-05	-1.32695	0.01917
D830026I12Rik	AK052888	-2.12148	2.44038e-07	-1.894	3.82382e-08	-1.55675	4.67133e-06	-1.38312	2.58698e-07
Peg3	NM_008817	-2.12221	4.73608e-32	-1.75673	6.57877e-14	-1.72168	1.57955e-09	-1.51174	1e-05
Myo1b	NM_010863	-2.12268	3e-05	-2.07826	1.19531e-20	-1.99235	9.26077e-11	-1.63795	7.27647e-10
Ankrd11	AK019393	-2.12354	0.00024	-1.53388	0.00957	-1.50081	0.04566	-1.68608	2.38021e-09
Cirbp	NM_007705	-2.12392	6.82631e-27	-1.77504	2.1314e-11	-1.46753	2.48331e-06	-1.43936	1.03154e-06
Clec4g	NM_029465	-2.12431	1.34947e-27	-1.64521	1.35838e-06	-1.26225	0.01736	-1.0043	0.95234
Tnrc6b	NM_177124	-2.12467	6.79454e-08	-1.57004	0.0047	-1.68521	0.02206	-1.42806	1.38464e-07
Mrc1	NM_008625	-2.12468	6.5407e-33	-1.34662	3.51028e-06	1.19609	0.00054	1.35662	1.84924e-08
Gabra4	NM_010251	-2.12688	5.94182e-06	-1.54953	0.01527	-1.79717	4.99267e-06	-1.86254	0.0008
Mfap3l	AK017269	-2.12819	9.10353e-14	-1.60088	4.52415e-17	-1.27332	0.0004	-1.30126	0.0001
D830014E11Rik	NM_177251	-2.12831	7.04968e-16	-2.18636	6.14657e-30	-1.24895	0.00077	-1.21101	0.10889
Ank1	NM_031158	-2.12871	4.57298e-32	-1.82647	5.71431e-10	-1.29314	0.00205	-1.23134	0.03981
BC011209	NM_145447	-2.12961	2.5956e-13	-1.70222	1.74358e-10	-1.53375	7.29018e-09	-1.4453	0.00018
A530058N18Rik	AK081828	-2.12981	0.00015	-1.81594	1.62538e-11	-1.61276	8.93618e-09	-1.85116	2.34467e-14
Cdh4	AK049087	-2.12985	6.34816e-10	-1.7972	2.34425e-06	-1.31242	0.00835	-1.14624	0.10296
Klhl9	AK039099	-2.13001	9.26748e-19	-1.38617	0.0031	-1.12117	0.23128	-1.61521	5.31827e-16
Sema6a	AK084037	-2.13041	2.70159e-13	-1.61373	2.25937e-15	-1.60816	0.00099	-1.39096	0.00027
LOC385154	NM_001018085	-2.13196	7.57048e-08	-1.39277	0.00193	-1.68867	0.00352	-1.39964	7.55917e-06
Spna2	AK037683	-2.13362	2.01478e-35	-1.59541	2.42742e-16	-1.51647	3.00589e-14	-1.62049	2e-05
AI428795	NM_024477	-2.1343	2.61921e-23	-1.80034	2.83196e-12	-1.37225	8.03795e-09	-1.21504	0.14257
NAP032883-1		-2.13449	6.38842e-35	-1.69136	4.10008e-23	-1.32426	7.86317e-06	-1.08838	0.3747
Kctd12b	NM_175429	-2.1348	4.45176e-06	-1.63767	8e-05	-1.36366	0.02325	-1.23347	0.0497
Aqp8	NM_007474	-2.13481	5.5338e-17	-1.09859	0.50655	1.02075	0.90055	-1.09315	0.23654
Pigy	NM_025574	-2.13497	2.04273e-08	-1.60988	2.42283e-14	-1.31693	0.00117	-1.50546	0.007
Phactr1	NM_198419	-2.13545	2.59232e-20	-1.52468	1.12604e-07	-1.91142	3.9131e-07	-1.79106	5.02537e-18
Col4a4	NM_177015	-2.13588	8.86721e-09	-1.5998	1.2944e-09	-1.48462	1.04387e-10	-1.33279	0.0004
Foxo3a	AK079567	-2.13714	1.45735e-21	-1.404	0.0001	-1.24179	0.01093	-1.40321	0.00194
Ddit4	NM_029083	-2.13731	3.03325e-37	-1.65785	3.27122e-14	-1.69159	1.36979e-13	-1.70225	9.25006e-24
Fts	NM_010241	-2.13768	7.7009e-21	-1.45496	3.2184e-11	-1.38424	4.64922e-09	-1.46955	0.00057
Als2cr19	XM_110852	-2.13808	8.95062e-07	-1.73585	1.08921e-08	-1.56906	0.0016	-1.60203	2e-05
1200015N20Rik	NM_024244	-2.1386	4.33018e-13	-1.63441	0.00055	-1.25574	0.05005	-1.34162	0.00328
Mapt	M18776	-2.13871	5.68171e-14	-1.66842	5.54734e-10	-1.50205	1.84295e-08	-1.4618	0.0001
Abra	NM_175456	-2.13882	1.18589e-14	-1.65027	2.81812e-21	-1.72778	3.5129e-15	-1.83887	2.85812e-18
D630013G24Rik	XM_357326	-2.13901	8.79484e-18	-1.64923	4e-05	-1.43327	0.00053	-1.51967	1.33902e-11
Rhobtb1	AK005770	-2.13936	1.01798e-10	-1.60003	8.7817e-06	-1.69513	0.00043	-1.97307	6.81601e-19
B930063P07Rik	AK048582	-2.13977	3.67855e-16	-1.62758	1.7075e-13	-1.44267	8.05225e-08	-1.84199	1.97545e-09
Ahsg	NM_013465	-2.13999	1.30146e-23	-1.34515	2e-05	1.67129	1.04185e-11	1.69123	1.18652e-18
LOC553138	AK051413	-2.14024	4.9695e-10	-1.72257	7.12758e-07	-1.55966	0.02122	-1.93252	2.96677e-06
Rdm1	NM_025654	-2.14084	1.35866e-22	-1.70095	5.21006e-15	-1.46418	0.00011	-1.2782	0.00133
Alpk3	NM_054085	-2.14098	3.40739e-15	-1.53461	4.57929e-08	-1.24572	0.00093	-1.12025	0.2111
Prdx6	NM_007453	-2.14127	1.19811e-16	-1.75863	2.32599e-06	-1.37601	0.00096	-1.39396	0.00203
Phka1	AK035307	-2.14283	5.5472e-06	-1.43878	0.01479	-1.41847	0.02234	-1.68916	6.04898e-19
Kazald1	NM_178929	-2.14348	1.10768e-11	-1.94553	2.96286e-11	-1.42971	0.00031	-1.19306	0.00261
Slc7a10	NM_017394	-2.14351	1.22755e-12	-1.82419	3.74751e-12	-1.77582	7.65735e-13	-1.79836	5.35548e-10
Nrn1	NM_153529	-2.14458	1.08219e-17	-1.53477	5.56425e-15	-1.68672	1.45346e-19	-1.56874	1e-05
Clstn2	NM_022319	-2.14504	4.64013e-13	-1.78566	1.1211e-08	-1.40571	1.3796e-06	-1.27176	0.05426
Adrb2	NM_007420	-2.14579	3.58662e-41	-1.47107	4.08461e-09	-1.47669	2.86662e-09	-1.73648	2.45489e-08
D930050A07Rik	AK053100	-2.14658	1.22817e-26	-1.4843	7.09522e-06	-1.11654	0.11862	-1.2401	0.00692
AK083203	AK083203	-2.14695	2.04666e-22	-1.58996	8.57418e-16	-1.37414	3.3169e-08	-1.29235	4e-05
4833414E09Rik	NM_027845	-2.14703	1.93304e-27	-1.62808	5.62835e-10	-1.48208	0.00181	-1.44613	6.27756e-08
Es1	NM_007954	-2.14703	1.84186e-07	-1.83438	3.87433e-12	-1.01255	0.8486	-1.02594	0.78334
5830428H23Rik	AK054073	-2.14797	0.00157	-1.5003	0.00602	-1.28613	0.19886	-1.90045	1e-05
B230120H23Rik	AK032448	-2.14816	1.99793e-08	-1.54286	0.00042	-1.66541	0.0001	-1.59112	6.47296e-14
Plin	NM_175640	-2.14825	3.21679e-11	-1.97589	2.13155e-11	-1.81495	6.75466e-10	-2.38511	1.21836e-22
A330076H08Rik	AK048029	-2.14848	6.43097e-13	-1.89379	6.18645e-24	-1.37673	0.08848	-3.0905	3.45113e-18
Ablim1	AK122196	-2.15076	1.69056e-25	-1.71612	3e-05	-1.6616	0.00537	-1.55821	3.81249e-07
Gpihbp1	NM_026730	-2.15165	4.88541e-25	-1.83569	2.78947e-20	-1.13632	0.06771	-1.08278	0.17121
Pam	NM_013626	-2.15168	1.14528e-13	-1.60009	2.91588e-06	-1.32342	3e-05	-1.27534	0.2004
Eif2c1	BC027783	-2.15273	2.99726e-14	-1.77796	5.57466e-08	-1.96534	1.23107e-06	-2.02658	9.38993e-13
Cplx2	NM_009946	-2.15317	8.78869e-10	-1.53242	0.001	-1.54959	0.0004	-1.65311	7.22626e-07
Lmo7	AK053129	-2.15327	4.37073e-22	-1.73024	6e-05	-2.13066	1.57753e-07	-2.24081	4.95879e-16
Cdh26	NM_198656	-2.15442	5.41078e-07	-1.80283	2e-05	-1.71265	0.00046	-1.38587	0.02719
Mrps6	AK089833	-2.15443	2.96969e-06	-1.77401	3e-05	-1.36798	0.00926	-1.09619	0.52483
Dusp26	NM_025869	-2.15466	1.83273e-31	-1.67398	1.12176e-17	-1.15003	0.00993	1.21475	0.01145
1700025G04Rik	BC022177	-2.15474	4.28691e-17	-1.73591	3.2749e-10	-1.42554	0.00215	-1.58076	0.00254
Grp	NM_175012	-2.15678	3.21635e-15	-1.73764	6.14224e-12	-1.00967	0.89773	1.04999	0.53373
Itgb1bp2	NM_013712	-2.15678	5.03916e-27	-1.67899	1.32746e-14	-1.37676	0.00852	-1.39906	5e-05
Aldh1a3	NM_053080	-2.15743	4e-05	-1.09886	0.46781	2.09595	1.22997e-07	2.59559	1.61841e-07
LOC668066	BB054706	-2.1575	1.54003e-06	-1.47657	8.89259e-09	-1.29682	0.00148	-1.34706	0.00283
AK083150	AK083150	-2.15753	1.24456e-20	-1.62362	4e-05	-1.144	0.07677	1.03665	0.7387
Rspo2	NM_172815	-2.15804	2.20253e-09	-1.8059	0.0001	1.24289	0.36291	-1.15563	0.22651
Hist1h2be	BC032927	-2.15829	7.28944e-18	-1.67514	1.16093e-10	-1.40877	2.13213e-08	-1.29329	3.18188e-06
Slc15a2	NM_021301	-2.15849	8.08252e-32	-1.27516	5.29638e-06	-1.32381	6e-05	-1.25926	0.00385
Ankrd12	AK086311	-2.1608	8.46744e-19	-1.57997	5.32514e-11	-1.61115	2.54802e-06	-1.65367	1e-05
AK044873	AK044873	-2.16213	1.50411e-11	-1.60415	6.98286e-08	-1.2717	0.0528	-1.54297	0.006
LOC381438	NM_198657	-2.16261	1.24215e-15	-1.72848	7.40937e-21	-1.40736	1.42378e-08	-1.28211	0.00012
6620401M08Rik	AK029831	-2.16294	8.48391e-10	-1.61111	3.48985e-11	-1.36981	0.00108	-1.29212	0.03437
Abat	NM_172961	-2.16344	4.13224e-10	-1.55901	0.00141	-1.25739	0.0689	-1.5504	0.00039
BC031593	NM_146063	-2.16385	6.97145e-31	-1.45415	3.7901e-08	-1.24457	0.00038	1.25519	0.00397
AK043717	AK043717	-2.16405	3.64998e-20	-1.70887	1.22766e-13	-1.21207	0.01881	-1.09242	0.16386
Srms	NM_011481	-2.16505	2.60746e-18	-1.771	3.08754e-10	-1.16608	0.11825	-1.14472	0.01043
Bmpr2	AK083553	-2.16526	2.97254e-09	-1.54511	0.00023	-1.55779	0.00101	-1.66788	2.78871e-13
Gpc3	NM_016697	-2.16587	1.58028e-18	-1.60056	2.70915e-12	-1.59358	1.80375e-17	-1.75351	5.36335e-12
Hrc	NM_010473	-2.1678	5.01269e-21	-1.91587	1.37793e-12	-1.62619	6e-05	-1.28575	0.01036
Slco2b1	NM_175316	-2.16817	2.82439e-20	-1.67167	9.99803e-16	-1.49412	1.21114e-09	-1.24507	0.01045
Tnrc15	NM_146112	-2.16846	0.00047	-1.7025	0.00233	-1.67185	0.04316	-2.02875	6.55446e-10
A430107O13Rik	XM_145117	-2.17	1.17419e-08	-1.40801	0.0001	-1.32738	0.004	-1.26791	8.88427e-06
Sema3g	AK129018	-2.17049	3.18405e-14	-1.79792	7.58281e-08	-1.43213	0.00075	-1.23684	0.09431
C77370	XM_205178	-2.17116	4.89839e-07	-1.4932	0.002	-1.3504	0.02034	-1.31773	0.00351
Hyal1	NM_008317	-2.17146	4.76168e-09	-1.62359	2.25705e-07	-1.43475	1.05215e-07	-1.59429	4.43803e-06
6330417K15Rik	AK018192	-2.17147	9.00171e-12	-1.53884	0.00021	-1.27986	0.13685	-1.20932	0.03703
Spinlw1	NM_029325	-2.17151	2.94169e-28	-1.42258	2.26308e-10	-1.34921	0.00072	-1.52372	7.74984e-11
XM_622288	XM_622288	-2.17172	1.759e-08	-1.4508	0.0003	-1.58989	0.00167	-1.63057	5.66056e-07
Rbm16	AK054357	-2.17214	7.49011e-11	-1.44724	4.49917e-08	-1.61042	0.00143	-1.88808	1.79288e-09
AK037317	AK037317	-2.17275	2.1331e-08	-1.46947	0.01812	-1.61137	0.00479	-1.85852	1.79292e-25
Dtna	NM_010087	-2.17298	4.50372e-24	-1.46407	2.43306e-06	-1.24726	0.01064	-2.18353	9.70255e-13
Sncaip	AK017012	-2.17502	1.86878e-15	-2.18208	1.72393e-37	-1.60566	2.6739e-14	-1.51132	0.00051
Sepp1	NM_009155	-2.17544	6.05476e-08	-1.65745	3.30584e-12	-1.46833	7.46942e-09	-1.19784	0.01264
4833416E15Rik	AK014707	-2.1763	1.89147e-15	-1.60329	0.00261	-1.05455	0.84126	1.3364	0.01506
Myl3	NM_010859	-2.17637	4.10485e-17	-1.78116	4.1389e-07	-1.19926	0.0682	-1.21322	0.00651
Cyp2d26	NM_029562	-2.17786	2.76562e-26	-1.08209	0.40632	1.02964	0.75139	-1.0203	0.8149
Helz	AK020667	-2.1784	7.99993e-08	-1.621	2.11275e-17	-1.28312	0.00018	-1.4567	1.1976e-11
Nox4	NM_015760	-2.17852	1.00199e-13	-1.98665	1.43947e-21	-1.66485	1.2762e-13	-1.42629	3.41943e-08
4930523C07Rik	AK054156	-2.17923	1.48213e-22	-1.68233	2.25606e-15	-1.58846	3.68793e-18	-1.48732	4.66563e-07
Abca5	AK129463	-2.1806	3.25594e-17	-1.41952	0.00152	-1.42762	0.00087	-1.42168	0.00016
Myl9	XM_485171	-2.18136	2.0787e-14	-1.3844	0.00089	-1.12209	0.33411	-1.03521	0.66741
D130054N24Rik	AK050638	-2.18177	1.55402e-31	-1.83793	3.14744e-14	-2.01693	0.00068	-1.71207	1.39787e-09
AK033351	AK033351	-2.1819	3.20271e-23	-1.99615	2.46046e-10	-1.63451	3.53035e-06	-1.5493	2.43924e-14
Filip1	XM_486240	-2.18266	3.10903e-18	-1.61644	5e-05	-1.66597	0.00111	-2.38271	4.92241e-37
Pvrl3	NM_021495	-2.18315	1.47094e-10	-1.73754	4.14675e-06	-1.5447	0.00433	-1.5917	8e-05
Pink1	NM_026880	-2.18321	2.37092e-32	-1.75097	6.88592e-23	-1.63312	3.63637e-12	-1.32646	9.17403e-08
D930047P17Rik	NM_172925	-2.18431	1.01407e-17	-2.08111	1.26742e-07	-2.8572	0.03189	-1.60228	0.03675
Apoa1	NM_009692	-2.18488	5.96722e-20	1.00143	0.9906	1.03453	0.85575	1.01239	0.93042
D030041N04Rik	AK041725	-2.18494	1.46707e-19	-1.78019	3.3897e-19	-1.58148	2e-05	-1.60553	2.82115e-06
Qk	AK078631	-2.18538	3.04381e-10	-1.80012	1.88226e-06	-1.34934	0.07806	-1.87042	2.37545e-20
2610009E16Rik	NM_026988	-2.18686	0.00344	-1.73318	0.02939	-1.77463	0.01396	-2.07819	1.93273e-30
Atbf1	AK020706	-2.18898	3.9449e-16	-1.60919	1.76329e-07	-1.32806	0.00194	-1.4762	0.01228
Ltbp4	NM_175641	-2.18989	7.98876e-28	-1.71487	5.59117e-19	-1.46831	8.01629e-09	-1.31756	2.72032e-06
NAP025923-1		-2.19064	6.26113e-06	-2.04172	4.7947e-06	-1.50338	0.00509	-2.13665	1.57328e-08
2700082O15Rik	XM_619790	-2.19292	9.49173e-08	-1.75128	1.09608e-09	-1.35975	0.00542	-1.3716	0.00012
Mlxipl	NM_021455	-2.19298	1.61388e-33	-1.58045	1.22874e-16	-1.42517	4.10865e-06	-1.72968	1.86525e-23
D430015B01Rik	NM_153574	-2.19308	2.99596e-20	-1.68821	2e-05	-1.67507	0.00021	-1.56378	2.55948e-13
1700003O08Rik	AK005653	-2.1931	2.11632e-18	-1.66595	8.88483e-06	-1.66992	3e-05	-1.57722	6.95832e-08
BQ952480	AK081094	-2.19401	5.34852e-13	-1.27871	0.00283	-1.21314	0.17619	-1.62819	0.0097
Vsnl1	NM_012038	-2.19447	8.59613e-23	-1.43869	0.00036	-1.15074	0.0953	-1.2225	0.00015
Fat4	AK031348	-2.19491	3.46452e-28	-1.71363	0.00021	-1.43775	0.00016	-1.68187	1.98951e-11
Abcg5	NM_031884	-2.19537	2.51637e-15	-1.4486	4e-05	-1.22819	0.00785	-1.13108	0.12344
Tln2	AK029828	-2.19651	1.27137e-13	-1.7314	1.22553e-15	-1.301	0.00049	-1.09838	0.10531
Zp3	NM_011776	-2.19656	1.25607e-14	-1.44375	0.03619	-1.19549	0.2832	1.15746	0.08359
Tspan7	NM_019634	-2.19736	3.38706e-10	-1.89071	3.84364e-09	-1.6091	5.34055e-08	-1.25974	0.02221
Negr1	AK122576	-2.19748	1.85495e-14	-1.61023	3.93623e-14	-1.51458	6.02471e-12	-1.70337	2.64081e-12
E130013N09Rik	BC060623	-2.19865	2.77229e-21	-2.01066	5.46509e-11	-1.61841	9.47812e-09	-1.29906	3.87883e-06
Fbxo7	BC059894	-2.2	1.84201e-15	-1.62629	7.17421e-06	-1.19556	0.03346	-1.38873	0.00074
Osbpl1a	NM_207530	-2.20014	2e-05	-1.52857	0.00269	-1.66763	0.00121	-1.82962	9.38943e-19
Dnahc5	AK034139	-2.20079	1.73335e-17	-1.3125	4.76066e-06	-1.10416	0.11608	-1.34035	1.72965e-07
1110012J17Rik	AK035834	-2.2008	2.98112e-27	-1.69884	6.95071e-23	-1.63975	3.32577e-10	-1.49368	1.50322e-09
Fabp4	NM_024406	-2.20145	2.69043e-33	-2.31187	8.84837e-33	-1.41297	2.59878e-10	-2.19374	5.11157e-24
1300013J15Rik	NM_026183	-2.20222	5.10289e-32	-1.49447	6.01148e-09	-1.41596	4e-05	-1.66447	3.09695e-07
Tspan18	NM_183180	-2.20361	1.95324e-18	-1.72838	7.95961e-10	-1.38951	5.469e-09	-1.19133	0.03244
A2bp1	NM_021477	-2.20416	1.29351e-10	-1.53088	0.0001	-1.29022	4e-05	-1.07876	0.36995
BC057022	NM_001004180	-2.20475	7.63775e-38	-1.67522	9.01475e-13	-1.54573	1.12286e-13	-1.53081	5.2422e-07
TC1522119		-2.20508	4.72208e-17	-1.6936	1.59131e-16	-1.21434	0.00048	-1.24802	0.00229
9530091C08Rik	AK028720	-2.20646	9.57695e-33	-1.5936	4.25564e-16	-1.32944	1.2646e-06	-1.16063	0.02932
T2	NM_013682	-2.20677	6.68956e-11	-1.65926	0.00023	-1.62339	5.9134e-09	-1.52169	6.23777e-10
Cdh13	NM_019707	-2.20775	9.60467e-32	-1.64143	3.05845e-09	-1.48928	3.45289e-11	-1.30453	0.00067
5033421B08Rik	AK017181	-2.20804	3.44918e-30	-1.85478	7.72764e-11	-1.57714	5.70239e-09	-1.36477	4e-05
Vtn	NM_011707	-2.20863	5.89786e-14	-1.79511	4.55579e-08	-1.37122	0.00021	-1.1345	0.26196
Duoxa1	NM_145395	-2.20868	0.00534	-1.22758	0.41154	-1.06697	0.75449	-1.05636	0.77785
Cyp2b9	NM_010000	-2.20955	1.85367e-23	-1.58967	3.06863e-14	-1.36749	1.11387e-06	-1.24847	0.00031
Myoz2	NM_021503	-2.20964	2.07142e-26	-1.75897	1.58934e-18	-1.53149	9.11105e-15	-1.3715	2e-05
Tmem64	AK035894	-2.21251	4.95265e-15	-1.68403	5.19849e-13	-1.15181	0.08874	-1.07217	0.33712
Acss1	AK038517	-2.21348	8.64562e-25	-1.73545	2.74078e-13	-2.06336	5.24747e-09	-2.01212	1.75592e-26
BC038479	NM_153803	-2.21502	4.8104e-16	-1.71046	7.9319e-07	-1.51212	6.45852e-11	-1.57415	7.76997e-09
Cyp2d22	AK090296	-2.21623	2.913e-13	-1.84936	1.26468e-12	-1.54554	1.40166e-13	-1.33864	5.1568e-08
ORF28	BC005604	-2.21659	7.46157e-10	-1.62914	2.09892e-07	-1.34419	8.20538e-06	-1.29183	0.02478
Ear10	NM_053112	-2.21683	5.43356e-07	-1.88264	1.05309e-08	-1.5764	0.00835	-1.15631	0.21342
Cnn1	NM_009922	-2.21692	4.81334e-21	-1.14401	0.03154	-1.3781	1.2662e-07	-1.43997	0.00146
Slc6a4	NM_010484	-2.21715	3.80891e-31	-1.62931	4.19859e-09	-1.57948	4e-05	-1.35881	5e-05
Gchfr	NM_177157	-2.21793	4.66966e-18	-2.08103	1.9849e-20	-1.11036	0.23012	-1.1834	0.03129
Utrn	NM_011682	-2.21821	5.31152e-15	-1.63816	0.00015	-1.93225	2.16284e-06	-2.09382	6.77849e-20
Amy2	NM_009669	-2.21875	1.803e-34	-1.92083	6.89759e-26	-1.44896	1.34651e-09	-1.86819	2.49782e-12
Ttn	NM_011652	-2.21924	2.19251e-07	-1.64664	0.0026	-1.60164	0.00305	-1.41173	0.00833
2410078J06Rik	AK010729	-2.21932	4.69794e-11	-1.71209	0.00442	-1.20983	0.05425	-1.22427	0.14131
0610038K03Rik	NM_026701	-2.2196	2.42839e-14	-1.71815	0.00801	-1.52038	0.00191	-1.38679	0.02025
Malat1	BC004722	-2.22003	1.85549e-06	-1.51153	0.04126	-1.80285	0.02111	-1.94585	4.052e-12
Hamp1	NM_032541	-2.22123	6.55142e-09	-1.95113	5e-05	-1.51256	0.01076	-1.1445	0.46675
Jarid1b	NM_152895	-2.22211	6.15974e-13	-1.59459	5.9109e-06	-1.47579	0.02142	-1.53428	0.00034
1810064L21Rik	XM_488727	-2.22241	8.45909e-28	-1.71537	2.6715e-16	-1.65125	7.35336e-07	-1.50483	1.37542e-08
Galnt13	AK047871	-2.2229	9.78783e-18	-1.38886	0.0047	1.14368	0.15533	1.04349	0.78996
Hrasls	NM_013751	-2.22342	5.89298e-08	-1.57721	5.77246e-06	-1.04555	0.80108	-1.47696	0.00255
BC054438	AK038244	-2.22348	1.30042e-14	-1.93508	7.94096e-07	-1.68949	1.0731e-06	-1.58233	1.55346e-10
Dhrs7c	NM_001013013	-2.22374	2.03788e-34	-1.9068	4.25402e-25	-1.77818	9.60114e-14	-1.86046	2.08425e-10
D330040H18Rik	AK084765	-2.22413	1.55807e-06	-1.67776	0.00016	-1.61843	0.0018	-2.36745	2.72753e-14
Megf6	BC039980	-2.22472	4.29858e-35	-1.82293	1.2362e-16	-1.34778	0.00126	-1.22408	0.01179
Per2	NM_011066	-2.22743	1.39945e-12	-1.39668	0.00162	-1.50692	2e-05	-1.49483	2e-05
1700111A04Rik	NM_177765	-2.22823	3.33147e-08	-1.94847	7.64976e-13	-1.13399	0.16306	-1.21088	0.01955
E030045M14Rik	AK087332	-2.22842	4.43542e-22	-1.82253	2.79971e-13	-1.51561	7.94262e-08	-1.56506	6.27498e-06
[truncated: 673 more rows]

## Sheet: WT + Lp vs Ifnar-Ifngr-ko + Lp 
Genes significantly stronger induced in infected WT compared to Ifnar/Ifngr-/- mice were used for comparison against LCV proteome data (Fig 4)
		WT + Lp vs. Ifnar/Ifngr-/- + Lp
name	accession #	fold change	p-value
Cxcl10	NM_021274	-88.6135	2.95477e-34
LOC240327	AK041062	-53.3789	3.13674e-24
Ifit1	NM_008331	-43.6954	0
Iigp1	NM_021792	-42.7827	0
BC020489	AK050122	-39.3712	0
Gbp4	NM_018734	-34.7857	0
Rtp4	NM_023386	-32.6685	0
Slfn4	NM_011410	-31.0008	0
Cxcl11	NM_019494	-28.9143	1.53504e-40
Indo	NM_008324	-28.0871	0
BC023105	NM_145357	-26.9827	0
Gbp5	NM_153564	-26.1862	0
A_52_P480044		-25.6561	0
Igtp	NM_018738	-25.5318	3.29866e-42
Slfn3	NM_011409	-19.8536	0
BC013672	XM_358375	-15.2007	0
A630077B13Rik	NM_175449	-15.062	6.16571e-44
LOC240921	XM_136331	-14.5626	0
Mx2	NM_013606	-14.069	0
Ifi44	AK085407	-13.884	5.12265e-38
LOC434341	XM_486147	-13.4633	1.24379e-31
NAP017963-001		-13.4436	4.75715e-35
Herc5	AK037442	-13.4383	9.78837e-19
Slc6a19	NM_028878	-13.1448	2.00366e-09
ENSMUST00000031817		-13.0681	0
Slfn9	NM_172796	-12.2106	4.92284e-35
D11Ertd759e	AK173199	-11.9855	2.2145e-29
Oasl2	NM_011854	-11.7509	1.33512e-40
Slfn8	NM_181545	-11.5235	0
Chit1	NM_027979	-11.4359	0
1810023F06Rik	NM_145449	-11.414	1.37656e-32
Oas1f	NM_145153	-11.3906	3.63268e-36
Gbp1	NM_010259	-11.2675	0
Cxcl9	NM_008599	-11.0663	9.10616e-25
Fbxo39	XM_282966	-10.9252	0
TC1463498		-10.8619	0
H2-Q8	NM_023124	-10.2187	0
1700016F12Rik	AK006025	-10.1763	5.22762e-12
Iigp2	NM_019440	-9.81297	9.03079e-21
5830443L24Rik	NM_029509	-9.71796	1.73835e-33
Mx1	NM_010846	-9.53814	1.03186e-26
9830147J24Rik	NM_145545	-9.51721	0
Gpr141	NM_181754	-9.06369	0
Mpa2	NM_008620	-8.97544	7.66672e-29
Irf7	NM_016850	-8.90872	2.35716e-31
Plac8	NM_139198	-8.83407	6.69189e-23
Batf2	NM_028967	-8.67606	0
Rsad2	NM_021384	-8.6391	1.17426e-33
2010002M12Rik	AK090072	-8.62384	0
Phf11	NM_172603	-8.42355	0
Cngb3	NM_013927	-8.41155	0
Apol6	AK010208	-8.35907	0
Tgtp	NM_011579	-8.30884	2.08705e-18
Ubd	NM_023137	-8.01204	1.79088e-25
AI607873	XM_129595	-7.99576	3.50325e-44
Isg15	NM_015783	-7.95882	5.70204e-18
TC1416031		-7.90742	0
Ctdsp1	AK080090	-7.84457	2.18962e-27
Ifit2	NM_008332	-7.74497	1.03964e-33
Sct	NM_011328	-7.72912	0
Ifnb1	NM_010510	-7.62784	0
Klra20	NM_053150	-7.62258	0
Ddx4	NM_010029	-7.49876	0
Usp18	NM_011909	-7.18991	2.24248e-38
Klra12	NM_010646	-7.17452	0
Lhx2	NM_010710	-7.1693	7.64524e-37
D14Ertd668e	NM_199015	-7.16677	2.43241e-35
A_52_P1173559		-7.02033	0
Tyki	NM_020557	-6.97729	0
Klra16	NM_013794	-6.97189	6.31357e-38
Fcgr1	NM_010186	-6.88454	5.22264e-42
9930111J21Rik	NM_173434	-6.76989	0
Klra7	NM_014194	-6.72956	0
1810065E05Rik	NM_027239	-6.68971	2.27197e-15
LOC432555	NM_001024230	-6.64033	2.23331e-30
Bst2	NM_198095	-6.61652	1.97266e-23
Serpina3g	AY862185	-6.58755	0
Irg1	AK036446	-6.55764	0
Klra23	NM_024470	-6.55479	0
Ms4a6b	NM_027209	-6.41285	0
Numa1	AK082639	-6.40815	0
Gvin1	NM_029000	-6.38627	0
1700112C13Rik	NM_183103	-6.3604	9.80148e-11
2210415F13Rik	NM_027339	-6.35253	3.24067e-13
Irgm	AK083346	-6.31695	1.4013e-45
Gm1966	XM_485982	-6.31472	0
Stat1	NM_009283	-6.31235	5.29148e-24
Rp23-14f5.7	BC022776	-6.30872	0
Il12rb1	NM_008353	-6.29384	0
9130218O11Rik	NM_177820	-6.29283	0
Slfn10	NM_181542	-6.28438	0
LOC667603	U76754	-6.23298	0
Socs1	NM_009896	-6.20104	0
Ifi27	NM_029803	-6.17986	9.71992e-14
D11Lgp2e	AK021012	-6.10096	5.44242e-27
Klra2	NM_008462	-6.08661	0
Gpr15	XM_156321	-6.04624	0
Oas1d	NM_133893	-6.00991	5.33265e-30
BC057170	NM_172777	-5.8742	2.67995e-17
Prm1	NM_013637	-5.83791	0
Stat2	NM_019963	-5.83067	0
Cd274	NM_021893	-5.71975	9.88631e-36
Ifih1	NM_027835	-5.68234	0
A530032D15Rik	NM_213615	-5.67182	6.52262e-41
Slc25a37	AK034948	-5.66888	0
Klra18	NM_053153	-5.66264	0
Trim30	NM_009099	-5.65658	0
9330175E14Rik	NM_177146	-5.63384	0
Pou3f1	NM_011141	-5.58252	1.10296e-23
Oas2	NM_145227	-5.5721	8.76344e-12
Ccl12	NM_011331	-5.48886	3.77305e-32
Tcstv1	NM_018756	-5.45521	0
Rnf36	NM_080510	-5.43777	0
2310031A07Rik	AK009549	-5.42044	0
3100002H09Rik	AK013916	-5.40523	1.9939e-12
Klra6	NM_008464	-5.37808	0
Klra9	NM_010651	-5.36254	0
Klre1	NM_153590	-5.32524	7.17821e-35
AK089636	AK089636	-5.31997	1.26417e-14
Fap	AK051959	-5.31729	0
Ifi47	NM_008330	-5.30502	5.4025e-34
Mmp13	NM_008607	-5.30101	0
Epsti1	NM_178825	-5.25271	0
BB206048	BB206048	-5.24961	0
AI447904	NM_175026	-5.21342	2.45911e-35
AW112010	AA726875	-5.21201	2.30994e-16
Slfn5	NM_183201	-5.20562	0
Oas1g	NM_011852	-5.19011	1.12104e-44
AI451617	NM_199146	-5.17856	8.03581e-32
Klrk1	NM_033078	-5.17125	3.40561e-39
NAP007796-001		-5.1653	7.9982e-27
Gzmc	NM_010371	-5.13522	0
AK008541	AK008541	-5.11648	7.81287e-13
Tcstv3	NM_153523	-5.06081	7.30413e-41
1700057G04Rik	XM_135054	-5.05553	5.99634e-10
Zc3h12d	NM_172785	-5.04797	0
1700129I15Rik	NM_030106	-5.00779	1.49427e-16
BC010462	NM_145373	-4.97636	4.40288e-42
A2m	NM_175628	-4.96043	1.99869e-12
Gzma	NM_010370	-4.93678	4.63717e-34
A630085K21	NM_177903	-4.93618	7.04605e-16
Tap1	NM_013683	-4.90327	8.9945e-27
Clec12a	NM_177686	-4.89634	1.2198e-21
B2m	BC002288	-4.88325	1.969e-35
Unc93a	NM_199252	-4.88171	1.15119e-15
Ncr1	NM_010746	-4.86744	0
Klra8	NM_010650	-4.8349	3.43318e-43
Lgals3bp	NM_011150	-4.82169	1.52154e-23
Serpina3f	BC049975	-4.80819	1.52327e-27
H2-T24	NM_008207	-4.79315	0
Oasl1	NM_145209	-4.78362	1.41188e-15
Hpse	NM_152803	-4.76708	4.2355e-39
AK046563	AK046563	-4.76676	3.90261e-26
Alox12e	NM_145684	-4.74756	7.18857e-31
Art2b	NM_019915	-4.74608	1.87428e-09
Ccl8	NM_021443	-4.74359	1.32071e-39
H2-T10	NM_010395	-4.74043	5.1848e-44
Klri2	NM_177155	-4.70261	3.27883e-09
Parp12	NM_172893	-4.69234	2.01297e-41
Ly86	NM_010745	-4.68509	0
ENSMUST00000082107		-4.66854	1.4013e-45
Cysltr2	NM_133720	-4.65987	0
Ms4a4d	NM_025658	-4.64774	0
Klra13	NM_010647	-4.63092	0
Zbp1	NM_021394	-4.58688	1.84312e-10
E430029J22Rik	AK088880	-4.56139	0
9030421J09Rik	NM_177744	-4.55144	3.68848e-09
Sp100-rs	XM_620661	-4.54959	0
Siglec1	NM_011426	-4.45365	0
A330102K04Rik	XM_283314	-4.44734	0
BC013712	BC013712	-4.40921	0
A530040E14Rik	AK087744	-4.37936	0
Mlkl	AK018636	-4.3774	1.26098e-32
Gzmb	NM_013542	-4.30028	2.35216e-29
Ifit3	NM_010501	-4.27377	2.10633e-22
NAP061805-1		-4.27316	6.51776e-35
A_52_P764477		-4.25898	0
Prss22	NM_133731	-4.25623	0
Fcgr3a	NM_144559	-4.22155	2.61641e-24
Gbp2	NM_010260	-4.21622	1.4145e-09
Aoah	NM_012054	-4.20366	0
Csprs	NM_033616	-4.18645	1.50652e-11
Samd9l	BC031151	-4.1771	0
Parp14	XM_488522	-4.17153	6.03895e-26
Eif2ak2	NM_011163	-4.14339	1.14642e-20
Oas1a	NM_145211	-4.1425	3.44442e-11
Parp9	NM_030253	-4.12632	0
Xcl1	NM_008510	-4.11077	2.41931e-20
Ctss	NM_021281	-4.1006	3.26736e-14
Trex1	NM_011637	-4.09916	1.88214e-28
Lrrc25	NM_153074	-4.08801	0
D430006K04	AK084893	-4.07157	1.82994e-22
Hand2	NM_010402	-4.06009	8.0197e-14
B3gnt3	NM_028189	-4.0515	5.42201e-27
NAP123578-1		-4.02829	4.23386e-37
Ms4a6d	NM_026835	-4.02027	4.08756e-25
Psmb8	NM_010724	-4.01923	8.12315e-17
H2-T22	NM_010397	-4.01349	3.30831e-25
4930599N23Rik	NM_175221	-3.99882	0
Klrc1	NM_010652	-3.99759	2.2509e-30
Ms4a4c	NM_029499	-3.99569	3.94649e-12
Tnfrsf14	NM_178931	-3.98454	2.7908e-19
A_52_P771912		-3.9795	0
2410146L05Rik	NM_026480	-3.96495	4.34615e-26
Ifi203	AK080088	-3.94347	0
Psmb9	NM_013585	-3.94301	2.55467e-18
Dnase1l3	NM_007870	-3.91338	7.10838e-18
Klrc3	NM_021378	-3.90964	8.16681e-14
Tbx21	NM_019507	-3.88021	0
Aif1	NM_019467	-3.86424	6.05069e-19
Prf1	NM_011073	-3.84099	0
B230219N05Rik	AK045665	-3.82652	1.82958e-09
Gatm	NM_025961	-3.82084	0
Pla1a	NM_134102	-3.80976	0
Nmi	NM_019401	-3.80802	0
Casp1	NM_009807	-3.80681	0
2310016F22Rik	NM_173743	-3.80408	1.69771e-21
Il12b	NM_008352	-3.80181	0
Slamf7	NM_144539	-3.80083	0
Slamf8	NM_029084	-3.78863	0
Fgl2	NM_008013	-3.77226	4.99983e-42
H2-M10.2	NM_177923	-3.76438	2.83477e-20
Eomes	NM_010136	-3.76083	3.17229e-25
Slfn1	NM_011407	-3.75745	0
Ube1l	NM_023738	-3.74065	0
H2-M3	NM_013819	-3.73082	8.77908e-24
Pbef1	NM_021524	-3.71251	1.45661e-14
Insl6	NM_013754	-3.70431	0
NAP123700-1		-3.6928	4.37809e-30
A630026L20	XM_620550	-3.67897	0
TC1467970		-3.65309	3.4807e-19
Ly6i	NM_020498	-3.6403	0
1700123I01Rik	AK007250	-3.63621	1.16542e-19
NAP000727-001		-3.62929	0
Ms4a6c	NM_028595	-3.62574	7.67757e-21
A730090H04Rik	AK080562	-3.58394	1.35707e-31
Wars	NM_011710	-3.5831	6.4853e-39
Trim21	NM_009277	-3.57175	0
Dppa3	NM_139218	-3.56963	0
Il10	NM_010548	-3.56238	0
Il18bp	NM_010531	-3.55091	6.88826e-15
Mobp	NM_008614	-3.5343	8e-05
C920025E04Rik	AK083376	-3.52348	1.10616e-07
NAP061485-1		-3.51768	0
Ifng	NM_008337	-3.50236	1.80067e-41
H2-T23	NM_010398	-3.50139	1.38579e-06
Cabp4	NM_144532	-3.48488	1.65753e-23
Lrrc4	NM_138682	-3.46534	8.85024e-16
Casp3	NM_009810	-3.45877	5.01644e-13
H2-Bl	NM_008199	-3.44832	0
5830484A20Rik	NM_175397	-3.44444	4.77114e-36
Klra3	NM_010648	-3.44124	3.08795e-20
Gpr33	NM_008159	-3.43539	1.55083e-24
Ddx58	NM_172689	-3.42548	0
Sfrp1	NM_013834	-3.42023	2.73362e-18
Parp11	NM_181402	-3.41945	0
Tlr7	NM_133211	-3.41576	0
Ccl7	NM_013654	-3.41477	1.78008e-37
Ube2l6	NM_019949	-3.41371	7.11985e-16
LOC622976	AK080287	-3.4077	1.67053e-24
Isg20	NM_020583	-3.38333	1.48394e-16
A630055G03Rik	XM_354943	-3.36696	4.04049e-19
1110007F12Rik	AK085154	-3.36482	1.15169e-33
H2-Q2	M28684	-3.36475	2.771e-09
Lair1	NM_178611	-3.35593	0
Ccl5	BC033508	-3.35087	3.46121e-43
Adar	NM_019655	-3.35035	3.41282e-40
C3ar1	NM_009779	-3.34711	0
C2ta	NM_007575	-3.34483	0
Cst7	NM_009977	-3.3283	0
Hemgn	NM_053149	-3.31145	6.0063e-06
Sp100	NM_013673	-3.31129	1.35788e-39
Gdap10	BC052902	-3.29981	4.03669e-19
Ccr5	NM_009917	-3.26052	0
Ppfia4	AK173053	-3.25482	1.14292e-12
TC1479009		-3.23286	4.34403e-44
Ly6f	NM_008530	-3.23222	3.51092e-14
Apoc2	NM_009695	-3.22031	1.60358e-20
Ms4a11	NM_022431	-3.21866	5.30021e-30
Dcp2	AK017809	-3.21627	0
Ifi205	NM_172648	-3.21585	1.05991e-12
Gcg	NM_008100	-3.20449	3.10788e-20
Apod	NM_007470	-3.19897	4.90454e-44
Ms4a7	NM_027836	-3.17333	0
D4Ertd179e	AK040902	-3.17072	2.55421e-25
Isgf3g	NM_008394	-3.17005	1.8192e-36
Tor3a	NM_023141	-3.1645	0
TC1453818		-3.15967	1.8014e-40
Trim25	NM_009546	-3.15095	8.19488e-29
Cd180	AK089613	-3.1479	1.624e-18
Klk1b5	NM_008456	-3.14785	2.43292e-32
LOC56628	NM_019909	-3.14446	3.31402e-15
Retnlb	NM_023881	-3.12252	3.59109e-26
Slc7a8	NM_016972	-3.109	6.34737e-15
Lgals9	NM_010708	-3.10043	4.71936e-14
Hk3	XM_127381	-3.09786	0
Daxx	NM_007829	-3.08847	0
Glrp1	NM_008132	-3.08206	1.04422e-14
Cd69	XM_132882	-3.06519	2.43668e-22
Pvr	AK014446	-3.05934	2.73816e-17
1700045I19Rik	NM_028842	-3.04971	2.03366e-18
LOC433377	XM_484937	-3.0359	1.00668e-11
NAP058998-1		-3.02662	0
Tnfsf10	NM_009425	-3.01611	0
AI480535	BU609786	-3.01127	3.57673e-19
NAP029234-1		-3.00686	4e-05
Clca1	NM_009899	-3.00491	2.94273e-44
Trafd1	NM_172275	-3.0044	9.41929e-21
Kcnj10	NM_020269	-2.99757	0
A030007L17Rik	NM_026637	-2.98	2.01372e-38
AI452102	XM_287711	-2.95904	0
Ifi204	NM_008329	-2.93943	1.39932e-16
Kcnt1	AK129355	-2.93216	1.18294e-08
Rgs1	NM_015811	-2.92969	0
NAP065340-1		-2.90423	1.44334e-43
Hrasls3	NM_139269	-2.89675	1.69966e-18
Nts	NM_024435	-2.89539	1.09735e-21
TC1479186		-2.88951	1.64621e-16
H2-Q7	NM_010394	-2.88346	2.09459e-07
Dmbt1	NM_007769	-2.88163	4.34701e-28
H2-K1	U47328	-2.87691	2.63587e-16
Gpr35	NM_022320	-2.87679	2.68622e-14
Ibrdc3	AK015966	-2.87585	1.97671e-23
NAP027924-1		-2.87156	6.62619e-12
4833422F24Rik	NM_029021	-2.87061	1.73646e-15
Psme2b-ps	NM_011191	-2.86751	1.07147e-06
Card15	NM_145857	-2.86586	7.95092e-25
TC1514992		-2.86305	4.73222e-10
Snx10	NM_028035	-2.85359	0
Plec1	BC024074	-2.84249	0
Casp4	NM_007609	-2.84231	5.2219e-19
H2-Q5	NM_010393	-2.82233	1.12023e-11
Cfb	NM_008198	-2.822	2.08925e-12
5430427O19Rik	AK017351	-2.82036	2.47377e-17
Trim12	BC094899	-2.8201	8.58604e-37
Psmb10	NM_013640	-2.80864	2.47037e-10
9030625A04Rik	NM_172488	-2.80131	9.2015e-33
Sectm1	NM_026907	-2.79636	9.79932e-36
Nppb	NM_008726	-2.79466	2.58111e-17
Procr	NM_011171	-2.77907	3.49731e-35
Kif5c	NM_008449	-2.77876	0
Asb13	NM_178283	-2.7726	8.08247e-31
Gpr65	NM_008152	-2.77116	9.69322e-18
AK089699	AK089699	-2.76195	2.48719e-15
Clnk	NM_013748	-2.7613	7.10642e-20
Ppa1	NM_026438	-2.74929	2.76308e-16
Mmp25	BC059059	-2.742	0
Smc1b	NM_080470	-2.73836	9.02031e-20
4922502D21Rik	NM_199034	-2.73765	2.61428e-11
A_52_P981179		-2.73333	1.81724e-35
4930438A08Rik	AK015331	-2.73197	1.26469e-19
H2-Q10	NM_010391	-2.72676	4.23204e-07
Cryba4	NM_021351	-2.72169	3.5272e-13
Kynu	NM_027552	-2.71201	9.7623e-16
H2-D1	NM_010380	-2.70109	2.34175e-15
Evi2a	NM_010161	-2.7007	0
H2-M2	AY302216	-2.69799	9.76416e-13
Oas1b	NM_011853	-2.69562	1.54872e-36
Irf1	NM_008390	-2.68531	0
Il2rb	NM_008368	-2.67843	1.33418e-33
Ncoa7	NM_172495	-2.64964	2.47521e-34
Chl1	NM_007697	-2.64276	2.94273e-44
Sap30	NM_021788	-2.6408	2.30338e-22
Pycard	NM_023258	-2.63163	0
2010005H15Rik	NM_029733	-2.62177	2.14291e-24
ENSMUST00000040006		-2.60794	1.4086e-21
NAP000023-001		-2.60285	4.99324e-17
Serpina10	NM_144834	-2.59846	1.21785e-10
Rnase6	NM_030098	-2.59645	4.27516e-20
Rasa4	BC057460	-2.58697	5.46506e-44
9030611K07Rik	NM_001001495	-2.57096	7.06311e-25
Cybb	NM_007807	-2.57043	2.45871e-17
1500032H18Rik	BC020137	-2.57026	0
TC1433510		-2.5675	3.70712e-20
Crtam	NM_019465	-2.55239	5.12307e-32
Ifi35	NM_027320	-2.54467	0
Phb	AK079993	-2.54182	1.34303e-15
2810022L02Rik	NM_144882	-2.52962	6.26616e-24
Kcna7	NM_010596	-2.52952	2.19325e-38
Zc3hav1	NM_028864	-2.52893	6.51918e-12
Gpr162	NM_013533	-2.51505	2.91407e-26
Arts1	NM_030711	-2.51146	1.48234e-31
Hspb1	AK019498	-2.50542	0.00046
BE447944	BE447944	-2.50536	2.01838e-34
Cxcl13	NM_018866	-2.49998	1.37307e-21
Pnpt1	NM_027869	-2.49643	2.31574e-39
Hap1	NM_010404	-2.49467	1.42248e-15
C130026I21Rik	AK047983	-2.49286	5.03472e-38
Tap2	NM_011530	-2.4914	0
Pnp	NM_013632	-2.49113	5.25844e-08
Car13	NM_024495	-2.49025	3.44416e-32
BC018371	NM_153807	-2.48627	3.96717e-35
Ccl2	NM_011333	-2.48571	8.57192e-14
Trim34	NM_030684	-2.48012	1.78706e-35
1700006H03Rik	AK005675	-2.47153	2.3066e-14
Gp2	NM_025989	-2.47129	2.33263e-24
2610016C23Rik	NM_027930	-2.4612	1.85258e-29
Dck	NM_007832	-2.45796	6.00524e-14
Clec4a3	AK014135	-2.44464	7.94936e-12
Clca2	NM_030601	-2.44201	6.83514e-12
Aadac	NM_023383	-2.43839	7.97467e-29
Fasl	NM_010177	-2.43693	4.90083e-11
Cspg2	D16263	-2.43565	8.02912e-33
Oas3	NM_145226	-2.43251	2.81439e-12
Slfn2	NM_011408	-2.43162	3.55845e-35
Il24	NM_053095	-2.43049	4.78506e-10
1100001H23Rik	NM_025806	-2.43044	1.49555e-18
Samhd1	AK128954	-2.43035	6.2314e-13
Fbxw17	NM_175401	-2.40916	1.36206e-42
Klk1	NM_010639	-2.40686	2.41991e-29
Il22	NM_016971	-2.40565	3.83785e-23
4930467M19Rik	AK015524	-2.40229	4.30569e-36
Ly6a	NM_010738	-2.40152	4e-05
9230105E10Rik	NM_175677	-2.39804	1.70927e-26
C1qb	NM_009777	-2.39514	1.03932e-22
Pla2g7	NM_013737	-2.39323	1.05458e-35
Mov10	NM_008619	-2.38624	3.32221e-37
Ermap	NM_013848	-2.38532	2.08951e-09
9130022K13Rik	NM_029419	-2.38438	2.75779e-08
Olfr430	NM_146718	-2.38142	4.98607e-27
A_51_P462771		-2.37955	9.228e-19
AI481105	XM_130703	-2.37349	3.79056e-12
Lap3	NM_024434	-2.37332	1.43763e-18
Zdhhc21	NM_026647	-2.37063	6.64221e-18
Pml	NM_008884	-2.36936	3.25907e-26
H2-D4	NM_008200	-2.36659	7.8117e-07
2610208M17Rik	NM_181732	-2.36652	2.35468e-28
Gm905	NM_001025606	-2.3649	7.00408e-19
Olfr741	NM_207133	-2.36419	4.60705e-20
Ada	NM_007398	-2.36405	4.77753e-24
BC006779	BC052532	-2.36352	1.82617e-15
Rab32	NM_026405	-2.3494	0
Slc2a6	NM_172659	-2.33829	1.4013e-45
Cd72	NM_007654	-2.33788	2.36783e-15
Plau	NM_008873	-2.3358	2.5952e-42
Cyp4f18	NM_024444	-2.33535	2.65863e-27
Galnt5	NM_172855	-2.33434	3.35162e-32
LOC327957	XM_282993	-2.33428	2.03989e-10
Ahrr	NM_009644	-2.32796	4.21236e-12
Nt5c3	NM_026004	-2.32557	1.87559e-24
Pld4	NM_178911	-2.32454	8.55789e-19
Spon2	NM_133903	-2.3241	1.72753e-26
2410004F06Rik	NM_028034	-2.32237	1.26538e-07
TC1449385		-2.31553	8.22925e-18
4922501K12Rik	AK076630	-2.3115	5.05684e-06
Klrd1	NM_010654	-2.30642	0
Olfr56	NM_010999	-2.2983	5.3128e-10
Slc15a3	NM_023044	-2.2903	1.80567e-19
Tlr3	NM_126166	-2.28831	5.07616e-14
Gimap7	NM_146167	-2.28649	2.08628e-32
Tmem106a	NM_144830	-2.28451	1.14473e-36
2700019D07Rik	NM_028287	-2.28125	8.28235e-17
Tnfsf4	NM_009452	-2.27658	1.21186e-16
Htr7	NM_008315	-2.27282	0.00101
C630050I24Rik	AK021281	-2.27198	3.38466e-17
Tapbpl	NM_145391	-2.27089	1.05866e-14
Ly6c	NM_010741	-2.26323	5.88748e-09
Pacsin1	NM_178365	-2.25655	1.89018e-30
Psme1	NM_011189	-2.25523	7.28199e-18
Slc37a2	NM_020258	-2.25465	1.05169e-25
6330442E10Rik	NM_178745	-2.25416	5.82966e-20
Ms4a4b	NM_021718	-2.25203	2.37412e-15
Il2ra	NM_008367	-2.25143	8.83946e-13
Ppt1	NM_008917	-2.2461	1.98868e-10
Klrb1f	NM_153094	-2.24292	7.41686e-08
C2	NM_013484	-2.24047	8.79286e-39
Ass1	M31690	-2.23698	1.07937e-11
Sypl	AK035670	-2.23552	7.0996e-26
Tlr1	NM_030682	-2.22972	4.40766e-25
TC1433768		-2.22851	2.18155e-21
Nkg7	NM_024253	-2.22844	2.73481e-06
Lst1	M18187	-2.22628	8.84765e-08
Cd40	NM_170701	-2.22552	4.9049e-27
Mpeg1	L20315	-2.22274	3.56118e-13
Aim1	BC059272	-2.21295	1.83174e-31
Reg3g	NM_011260	-2.21229	6.92549e-08
Pkib	L02241	-2.2121	2.908e-19
Rab11fip5	NM_001003955	-2.20465	1.47379e-29
Aytl1	NM_173014	-2.20082	4.74987e-22
2310043J07Rik	AK009780	-2.20043	2.43303e-12
H2-Aa	NM_010378	-2.1993	1.08407e-23
1810054D07Rik	NM_027238	-2.19927	5.54354e-42
C1qc	NM_007574	-2.18766	1.3082e-28
Smpdl3b	NM_133888	-2.1872	1.03627e-12
Ogfr	NM_031373	-2.18496	8.05785e-39
Crebl2	AK038845	-2.1842	1.0484e-18
T2bp	NM_145133	-2.18087	2.15195e-36
Casp12	NM_009808	-2.17897	1.88792e-36
4930427A07Rik	NM_134041	-2.17892	7.65822e-16
Itgb2l	NM_008405	-2.17834	1.36248e-09
2010106G01Rik	NM_023220	-2.17813	5.77096e-26
Nmral1	NM_026393	-2.17765	6.41635e-34
Apobec3	NM_030255	-2.16813	6.56163e-23
Saa1	NM_009117	-2.16289	1.40942e-22
Tapbp	NM_009318	-2.16004	7.75025e-17
Tor1aip2	NM_172843	-2.1592	1.25958e-11
Olfr1198	NM_207567	-2.1547	6.77065e-14
Ccdc88	AK019167	-2.15374	1.06705e-08
Saa4	NM_011316	-2.15108	6.99904e-33
Itgb6	AK087003	-2.14878	2.47997e-11
Rnaset2	AK015947	-2.14593	3.06354e-22
Lass6	NM_172856	-2.14582	1.94912e-17
BC027057	NM_145976	-2.14455	1.39323e-14
Serpina3m	NM_009253	-2.14389	9.54043e-37
Txk	NM_013698	-2.14158	1e-05
Plekha4	NM_148927	-2.13805	2.50473e-25
Cd8a	M12052	-2.13714	1.63374e-14
Fyb	NM_011815	-2.13423	4.00531e-14
Rsbn1l	AK040310	-2.13118	3.32446e-18
1700029I01Rik	NM_027285	-2.13058	1.18482e-21
Gpr18	NM_182806	-2.12775	8.3491e-14
kallikrein	V00829	-2.1262	3.17897e-15
Cxcr3	NM_009910	-2.12424	4.32803e-27
Apobec1	NM_031159	-2.12372	6.19418e-16
NAP029508-1		-2.12317	7.09698e-24
Apaf1	NM_009684	-2.11705	2.4644e-31
1110018G07Rik	NM_178065	-2.11522	2.86445e-12
Ifrg15	NM_022329	-2.10965	3.97494e-37
Syt15	NM_181529	-2.10814	1.93436e-33
Cd300d	NM_134158	-2.1065	1.05593e-12
March1	NM_175188	-2.10379	3.34688e-31
Bak1	NM_007523	-2.10307	3.5517e-23
Bid	NM_007544	-2.09761	1.9145e-14
Irf2	NM_008391	-2.09688	3.11451e-26
Xlr5d	BC051681	-2.09344	3e-05
Fanca	NM_016925	-2.09336	1.02853e-13
H2-Q1	AK037574	-2.09229	9e-05
2610307O08Rik	BC046640	-2.09181	8.15805e-32
MGC58177	NM_198666	-2.09167	6.184e-14
C1qa	NM_007572	-2.09054	3.15913e-33
Gla	NM_013463	-2.08601	7.47043e-16
Slc28a2	NM_172980	-2.08401	2.59579e-27
Ptgds2	NM_019455	-2.07968	3.28983e-19
Hrmt1l2	AK077046	-2.07966	1.3987e-20
Ninj2	NM_016718	-2.07695	3.50174e-14
Fcer1g	NM_010185	-2.07104	2.19048e-09
Gngt2	NM_023121	-2.06917	1.15074e-20
H2-Ab1	NM_207105	-2.06451	5.3327e-12
LOC544689	XM_618753	-2.06445	7.39406e-18
1300002K09Rik	NM_028788	-2.06226	1.03836e-10
Birc1b	NM_010872	-2.06077	6.01427e-12
Ptafr	AK032547	-2.06024	3.49667e-22
Ppp1r14d	NM_028104	-2.05887	3.26769e-19
Pi15	NM_053191	-2.05234	8.43805e-17
Pik3ap1	NM_031376	-2.05055	8.40862e-13
Serpinb9	NM_009256	-2.04637	6.24887e-26
Fabp7	NM_021272	-2.04442	6.21156e-24
Klk1b3	NM_008693	-2.04351	2.30017e-20
Cflar	NM_009805	-2.04296	8.66791e-17
Ccr2	NM_009915	-2.03767	6.77542e-07
Sell	NM_011346	-2.03571	2.06431e-22
Igf1	NM_010512	-2.03496	0
Prdx5	NM_012021	-2.03177	2.07805e-34
Ccl4	NM_013652	-2.02932	1.87601e-08
1600014C10Rik	NM_028166	-2.02848	8.7913e-14
Cd86	NM_019388	-2.02645	1.70231e-25
Loh11cr2a	NM_172767	-2.02569	1.0959e-22
Brip1	NM_178309	-2.02497	1.57556e-22
Lat2	NM_022964	-2.02156	7.39741e-30
Fpr-rs2	NM_008039	-2.0197	3.21782e-22
Lcp2	NM_010696	-2.01865	1.7436e-16
Ccrl2	NM_017466	-2.01647	1.24787e-15
Ggtla1	NM_011820	-2.01509	3.29644e-19
ENSMUST00000088886		-2.01366	1.628e-18
Klrg1	NM_016970	-2.01143	7.93782e-09
Phf6	NM_027642	-2.00648	8.04161e-31
Edem1	NM_138677	-2.00486	2.31017e-22
Stag3	NM_016964	-2.00409	2.35147e-20
Itga4	NM_010576	-2.00354	2.46303e-16
Gpr171	NM_173398	-2.00216	4.08427e-14
Speer4a	NM_029376	-2.00116	5.94805e-15
Arid5b	AK087356	-2.00082	1.9154e-14
