# Supplementary material for: IFNs Modify the Proteome of Legionella-Containing Vacuoles and Restrict Infection Via IRG1-Derived Itaconic Acid
Source: PLoS Pathog. 2016 Feb 1;12(2):e1005408. doi: 10.1371/journal.ppat.1005408 (PMC4734697; doi:10.1371/journal.ppat.1005408)
Supplement: S3 Dataset — Quantification of host-derived proteins identified in samples of LCVs from resting BMMs against LCVs from IFN-treated BMMs as well as quantification of proteins from LCVs of IFNβ against IFNγ treated BMMs. (XLSX) [file ppat.1005408.s012.xlsx]

## Sheet: IFNb vs. untreated
IFNβ/untreated LFQ intensity ratio [log2]	p-value	p-value [-log10]	Protein ID (uniprot identifier)	Protein names	Gene names
9.31916	3.53967e-06	5.45104	Q8CBB9;D6RJ49	Radical S-adenosyl methionine domain-containing protein 2	Rsad2
9.08982	0.00906871	2.04245	Q9Z0E6;Q01514;E9Q2N7;A4UUI2	Interferon-induced guanylate-binding protein 2	Gbp2
8.34368	2.28942e-07	6.64027	Q64282	Interferon-induced protein with tetratricopeptide repeats 1	Ifit1
7.60639	0.00398344	2.39974	E9PXF7;D3Z6F0		Gm14446
5.05105	0.000111276	3.9536	Q60710;F8WJE0	SAM domain and HD domain-containing protein 1	Samhd1
4.95621	0.00355716	2.4489	P37217	Early activation antigen CD69	Cd69
4.89194	0.000351858	3.45363	Q810Q5;A2AK37	Normal mucosa of esophagus-specific gene 1 protein	Nmes1
4.50534	0.0335499	1.47431	Q8VI94	2-5-oligoadenylate synthase-like protein 1	Oasl1
4.44334	6.04061e-05	4.21892	P54987	Immune-responsive gene 1 protein	Irg1
4.43016	0.000962929	3.01641	Q6Q899;A2AP29;Q6Q899-2;Q6Q899-3;Q6Q899-4	Probable ATP-dependent RNA helicase DDX58	Ddx58
4.34685	1.32436e-07	6.87799	Q3U5Q7	UMP-CMP kinase 2, mitochondrial	Cmpk2
3.96831	4.32275e-06	5.36424	Q91YX0	Protein THEMIS2	Themis2
3.94934	7.39915e-08	7.13082	Q8CBA2;F8WH72	Schlafen family member 5	Slfn5
3.89803	0.000465534	3.33205	O88627;A2AWR5;E9PXX9	Sodium/nucleoside cotransporter 2	Slc28a2
3.54527	0.000449199	3.34756	P27512;P27512-5;P27512-4;P27512-3;P27512-2;A2A5L7	Tumor necrosis factor receptor superfamily member 5	Cd40
3.49589	0.000665613	3.17678	P42082-2;P42082;D3Z363	T-lymphocyte activation antigen CD86	Cd86
3.46116	0.00116864	2.93232	Q64339	Ubiquitin-like protein ISG15	Isg15
3.45005	0.00372822	2.4285	Q8R5F7;Q8R5F7-2	Interferon-induced helicase C domain-containing protein 1	Ifih1
3.43299	0.000253492	3.59604	Q5SVP0;Q5SVP2;Q8CB10;Q5SVN9		9930111J21Rik1
3.33499	7.10544e-09	8.14841	Q9DCE9		Igtp
3.32423	2.17791e-06	5.66196	Q8BV49;Q504N7;E9PVL3;E9QL87;Q504N7-2	Pyrin and HIN domain-containing protein 1;Pyrin and HIN domain-containing protein 1-like	Pyhin1;BC094916
3.225	5.46004e-05	4.2628	Q8BHK6;Q8BHK6-4;Q8BHK6-2;Q8BHK6-3	SLAM family member 7	Slamf7
3.17405	3.98159e-06	5.39994	E9PZ21;Q91W59-2;Q91W59-3;Q91W59;G3UZJ9;Q8BWL5-4;Q8BWL5-6;Q8BWL5-3;Q8BWL5-2;Q8BWL5;Q8BWL5-5;E9Q7G6;Q8VC70	RNA-binding motif, single-stranded-interacting protein 1	Rbms1
3.16884	0.00383448	2.41629	E9Q5I7;Q3UAM9;Q63961;F7BZW0	Endoglin	Eng
3.11704	1.34681e-05	4.8707	P06339;F6VXI7;H3BJA9;H3BK58;F6TIX5;Q9BCZ1;A7VMS3;Q31615;F6T1I5;P14432;G3UZ37	H-2 class I histocompatibility antigen, D-37 alpha chain	H2-T23
3.10132	0.0002732	3.56352	P50543	Protein S100-A11	S100a11
3.09934	0.00057573	3.23978	E9QAM5;A2AS03;A2AS05		Helz2
3.08853	0.000681383	3.16661	Q3UYC0;Q3UYC0-2;E0CYP3;Q8BU27-2;Q8BU27;F8WGF9;E9Q2I3;Q149T7	Protein phosphatase 1H	Ppm1h
2.88829	1.48867e-05	4.8272	Q9QXJ2;E9QJX9		Stat2
2.85515	3.08927e-07	6.51014	Q9Z1M2		Irgm2
2.78845	0.000226701	3.64455	P21981;G3UXE8	Protein-glutamine gamma-glutamyltransferase 2	Tgm2
2.62002	9.73781e-07	6.01154	P01027;P01027-2;H3BL60;H3BKW9	Complement C3;Complement C3 beta chain;Complement C3 alpha chain;C3a anaphylatoxin;Acylation stimulating protein;Complement C3b alpha chain;Complement C3c alpha chain fragment 1;Complement C3dg fragment;Complement C3g fragment;Complement C3d fragment;Complement C3f fragment;Complement C3c alpha chain fragment 2	C3
2.61712	0.000639533	3.19414	Q99JZ4;P36536	GTP-binding protein SAR1a	Sar1a
2.59744	1.03414e-08	7.98542	Q08619	Interferon-activable protein 205-B	Ifi205b
2.56954	5.18894e-07	6.28492	Q8CFQ9;P56959;G3UXT7;G3UZD2;Q91VQ2	RNA-binding protein FUS	Fus
2.55467	0.000332699	3.47795	Q6PFQ7;Q6PFQ7-2;F6WTE9;F6W8M5	Ras GTPase-activating protein 4	Rasa4
2.53465	9.78062e-06	5.00963	Q8R2Q8	Bone marrow stromal antigen 2	Bst2
2.53388	0.000964208	3.01583	P62748	Hippocalcin-like protein 1	Hpcal1
2.51242	0.00030711	3.51271	Q9CYL5;B1AWD6	Golgi-associated plant pathogenesis-related protein 1	Glipr2
2.49273	0.000102151	3.99076	Q9EQU3	Toll-like receptor 9	Tlr9
2.40387	1.4458e-08	7.83989	Q3UIR3;Q3UIR3-2	E3 ubiquitin-protein ligase DTX3L	Dtx3l
2.39901	0.000466018	3.3316	P51908	C->U-editing enzyme APOBEC-1	Apobec1
2.37292	0.000129527	3.88764	Q8R151;A2A5R6;A2A5R5;A2A5R4	NFX1-type zinc finger-containing protein 1	Znfx1
2.35065	0.00012994	3.88626	Q91W50	Cold shock domain-containing protein E1	Csde1
2.31597	0.000177885	3.74986	Q64343	ATP-binding cassette sub-family G member 1	Abcg1
2.30982	4.08302e-05	4.38902	P21855;Q3UB58;A2AIN5;Q3UZ35;Q3UNJ0	B-cell differentiation antigen CD72	Cd72
2.29878	5.49836e-08	7.25977	P10107	Annexin A1	Anxa1
2.29763	7.10826e-08	7.14824	Q9ER38;M0QWH2	Torsin-3A	Tor3a
2.25602	8.18021e-05	4.08724	P26151	High affinity immunoglobulin gamma Fc receptor I	Fcgr1
2.24549	6.17194e-05	4.20958	Q99J87	Probable ATP-dependent RNA helicase DHX58	Dhx58
2.22533	4.35963e-07	6.36055	P29341;Q9D4E6;Q62029;A2A5N3;F6ZAX1;Q8C7D3;REV__D3Z2P2;REV__Q61362	Polyadenylate-binding protein 1	Pabpc1
2.22404	1.93908e-08	7.7124	F6TLV3;Q8BX90;E0CXY0;F7BWH4	Fibronectin type-III domain-containing protein 3A	Fndc3a
2.2206	0.00133955	2.87304	Q9Z2F2;D3Z324;D3Z352;F6Y3A6	2-5-oligoadenylate synthase-like protein 2	Oasl2
2.20015	1.277e-06	5.89381	Q07076	Annexin A7	Anxa7
2.18347	1.10508e-06	5.95661	O08573-2;B1AQR8;O08573;G3X9T7	Galectin-9	Lgals9
2.17894	1.12444e-10	9.94906	Q9CZS1;G3UYH1;Q62148;G3UWP3;P24549;O35945;Q9JHW9	Aldehyde dehydrogenase X, mitochondrial	Aldh1b1
2.16507	9.11776e-08	7.04011	Q91XB0;D3YUE0	Three prime repair exonuclease 1	Trex1
2.16201	8.16021e-05	4.0883	P49312;J3QK72;Q5EBP8;P49312-2	Heterogeneous nuclear ribonucleoprotein A1	Hnrnpa1;Gm7729
2.12476	5.94286e-08	7.226	Q8CAS9-2;Q8CAS9;Q8CAS9-3;H7BWY5;F6U1Y8	Poly [ADP-ribose] polymerase 9	Parp9
2.11428	7.5653e-05	4.12117	Q03963	Interferon-induced, double-stranded RNA-activated protein kinase	Eif2ak2
2.11221	2.91932e-07	6.53472	P97429;D3Z0S1;F7ANV6	Annexin A4;Annexin	Anxa4
2.09792	0.000388173	3.41097	E9QP99;P55937-1;P55937;D3Z0Q8	Golgin subfamily A member 3	Golga3
2.08807	7.4324e-08	7.12887	Q9Z0H4-11;E9QA47;Q9Z0H4-7;Q9Z0H4-5;Q9Z0H4-4;F6V6I8;Q9Z0H4;Q9Z0H4-8;Q9Z0H4-2;Q9Z0H4-6;Q9Z0H4-9;A3KGT2;A3KGT0	CUGBP Elav-like family member 2	Celf2
2.07244	3.05768e-06	5.51461	Q543K9;P23492;Q9D8C9	Purine nucleoside phosphorylase	Pnp
2.07016	1.03382e-06	5.98556	Q9JKP5;G3X9Q0;Q8C181-3;Q8C181-2;Q8C181;Q8C181-4;Q8R003;Q3TJQ3	Muscleblind-like protein 1;Muscleblind-like protein 2	Mbnl1;Mbnl2
2.06776	8.49638e-05	4.07077	O35639	Annexin A3	Anxa3
2.06714	0.0078834	2.10329	Q9CX86	Heterogeneous nuclear ribonucleoprotein A0	Hnrnpa0
2.04925	0.00107308	2.96937	Q99MU3;Q99MU3-2;Q99MU3-5;Q99MU3-4;Q99MU3-3	Double-stranded RNA-specific adenosine deaminase	Adar
2.04021	3.96545e-06	5.40171	Q9D8C4;D6RFB1	Interferon-induced 35 kDa protein homolog	Ifi35
2.0287	8.53605e-07	6.06874	Q80SU7	Interferon-induced very large GTPase 1	Gvin1
2.02854	2.56929e-07	6.59019	E9PX59;Q69Z37;D3Z7L1	Sterile alpha motif domain-containing protein 9-like	Samd9l
2.02323	1.40858e-05	4.85122	Q99MB1	Toll-like receptor 3	Tlr3
2.01489	9.02874e-06	5.04437	P16858;M0QWZ0;F8WJL5;D3YYI5;D3YU05;D3Z0Z9;F6QXU4;F6UT49;Q64467	Glyceraldehyde-3-phosphate dehydrogenase	Gapdh;Gm7293;Gm6316
2.01129	0.00240417	2.61904	Q8C3V4;P42225	Signal transducer and activator of transcription 1	Stat1
1.9996	9.85649e-08	7.00628	Q8VD31	Tapasin-related protein	Tapbpl
1.9839	8.51311e-06	5.06991	P16330-2;P16330	2,3-cyclic-nucleotide 3-phosphodiesterase	Cnp
1.98308	6.70151e-06	5.17383	P01887	Beta-2-microglobulin	B2m
1.96492	6.7279e-05	4.17212	Q9CQR2	40S ribosomal protein S21	Rps21
1.96393	0.00030195	3.52007	P23249;D3YVL0;E9PW39;D3YYR1	Putative helicase MOV-10	Mov10
1.95686	1.10099e-05	4.95822	O35309;B7ZD13;B7ZD12	N-myc-interactor	Nmi
1.93793	6.27965e-07	6.20206	Q9R233-2;Q9R233;Q3TCU5;G3UZZ2;G3UWL0	Tapasin	Tapbp
1.92915	0.000468274	3.3295	P25206	DNA replication licensing factor MCM3	Mcm3
1.91072	0.0084907	2.07106	Q8BMJ2	Leucine--tRNA ligase, cytoplasmic	Lars
1.89578	4.53441e-06	5.34348	E9Q7H5;B2RXM2;Q8BG05-2;J3QNY1		Gm8991;Gm6793;Gm9242
1.89091	0.00144873	2.83901	Q8BP47	Asparagine--tRNA ligase, cytoplasmic	Nars
1.88003	8.85773e-07	6.05268	P48036	Annexin A5	Anxa5
1.87666	0.000334684	3.47537	Q9D0I9	Arginine--tRNA ligase, cytoplasmic	Rars
1.86281	0.00631315	2.19975	Q8BL97-3;Q8BL97-4;Q8BL97-2;Q8BL97	Serine/arginine-rich splicing factor 7	Srsf7
1.8622	4.36772e-07	6.35974	Q8CG50;Q91Z34;D3Z444	Ras-related protein Rab-43	Rab43
1.85476	1.55316e-10	9.80878	Q3TBA3;P21958;F6QHF1	Antigen peptide transporter 1	Tap1
1.83685	0.000128019	3.89272	P07091;D3YUT9	Protein S100-A4	S100a4
1.80913	6.14625e-06	5.21139	Q9DBX5;P47713	Cytosolic phospholipase A2;Phospholipase A2;Lysophospholipase	Pla2g4a
1.80098	1.71754e-07	6.76509	E9Q9A9;E9Q9A9-2;F7CFL3	2-5-oligoadenylate synthase 2	Oas2
1.78953	0.0068184	2.16632	P61750;E9Q798;F6UFB9	ADP-ribosylation factor 4	Arf4
1.78495	4.25871e-06	5.37072	P11881-8;P11881-7;P11881-6;P11881-5;P11881-4;P11881-2;P11881-3;P11881	Inositol 1,4,5-trisphosphate receptor type 1	Itpr1
1.78306	0.00011089	3.95511	Q99K48;Q99K48-2	Non-POU domain-containing octamer-binding protein	Nono
1.76853	0.00162848	2.78822	P24547	Inosine-5-monophosphate dehydrogenase 2	Impdh2
1.75931	0.0124566	1.9046	Q91V08;Q9D676-2;Q9D676;F7ASN1	C-type lectin domain family 2 member D	Clec2d
1.75731	1.58318e-09	8.80047	P36371	Antigen peptide transporter 2	Tap2
1.75379	7.52006e-05	4.12378	Q52KC3;P49718	DNA replication licensing factor MCM5	Mcm5
1.75157	1.74048e-06	5.75933	P97384;D3Z7U0	Annexin A11;Annexin	Anxa11
1.74549	0.0051592	2.28742	Q8BT60;Q9D6C8;P59108;Q1RLL3;Q3UYN2;Q9Z140;Q8BLR2;Q0VE82;Q9DC53;B2RS65;Q8JZW4	Copine-3	Cpne3
1.73165	0.000198795	3.7016	O89051	Integral membrane protein 2B;BRI2, membrane form;BRI2 intracellular domain;BRI2C, soluble form;Bri23 peptide	Itm2b
1.72709	0.00071634	3.14488	D3YXZ5;Q91WT8;Q91WT8-2;D3Z113;Q5YD48-3;P86049;Q5YD48-2;Q5YD48	RNA-binding protein 47	Rbm47
1.72088	0.000259533	3.58581	Q8BZ20	Poly [ADP-ribose] polymerase 12	Parp12
1.70951	0.0247545	1.60635	P47856-2;P47856;Q9Z2Z9;D3YYD9	Glutamine--fructose-6-phosphate aminotransferase [isomerizing] 1	Gfpt1
1.6982	6.74577e-07	6.17097	P01901;P14428;P03991	H-2 class I histocompatibility antigen, K-B alpha chain	H2-K1
1.68831	4.01113e-05	4.39673	Q60738;F6TRQ3	Zinc transporter 1	Slc30a1
1.68647	0.00079159	3.1015	Q61881;D3Z6N3;D3Z335;D3Z0J6;D3Z2K9	DNA replication licensing factor MCM7	Mcm7
1.68234	0.00999564	2.00019	P12382	6-phosphofructokinase, liver type	Pfkl
1.67299	5.29011e-06	5.27654	Q60766-2;Q60766;Q5NCB5	Immunity-related GTPase family M protein 1	Irgm1
1.66341	3.14452e-05	4.50245	Q9DBE7;A2A5S3;A2A5R8;Q9Z108	Double-stranded RNA-binding protein Staufen homolog 1	Stau1
1.66247	0.000991947	3.00351	Q8BGQ7	Alanine--tRNA ligase, cytoplasmic	Aars
1.66239	1.75868e-05	4.75481	Q05144	Ras-related C3 botulinum toxin substrate 2	Rac2
1.65999	0.000233826	3.63111	P29452	Caspase-1;Caspase-1 subunit p20;Caspase-1 subunit p10	Casp1
1.65693	0.0214478	1.66862	Q8BU30;E9Q866	Isoleucine--tRNA ligase, cytoplasmic	Iars
1.65557	9.42178e-06	5.02587	P70333;J3QPH6	Heterogeneous nuclear ribonucleoprotein H2	Hnrnph2
1.65249	0.000113113	3.94649	E9PXI0;P27870;Q8VDU4	Proto-oncogene vav	Vav1
1.64483	0.00895613	2.04788	Q9QY24;A2APF7;Q9QY24-2	Z-DNA-binding protein 1	Zbp1
1.64301	0.00103205	2.9863	P14206;D3YTT7	40S ribosomal protein SA	Rpsa;Rpsa-ps10
1.63032	0.00557851	2.25348	Q9EPU0-2;Q9EPU0	Regulator of nonsense transcripts 1	Upf1
1.62328	3.52931e-08	7.45231	P01899;P01897;P01896;A7VMS6;E9Q0G4;G3UXE9;G3UX20;K7N5P0;G3UZL7;G3UY84	H-2 class I histocompatibility antigen, D-B alpha chain;H-2 class I histocompatibility antigen, L-D alpha chain	H2-D1;H2-L
1.61615	7.68105e-09	8.11458	P08207	Protein S100-A10	S100a10
1.6154	0.000269605	3.56927	P52850	Bifunctional heparan sulfate N-deacetylase/N-sulfotransferase 2;Heparan sulfate N-deacetylase 2;Heparan sulfate N-sulfotransferase 2	Ndst2
1.60886	0.000413801	3.38321	Q9D8T2	Gasdermin-D	Gsdmdc1
1.60427	0.000214461	3.66865	Q61792;A2A6G9;A2A6H0;A2A6G7;A2A6G8;A2A6G6;A2A6G5;E9Q0N6;A2A6H1;A2A6G0;A2A6G4;Q9DC07	LIM and SH3 domain protein 1	Lasp1
1.57599	6.87733e-05	4.16258	P70372	ELAV-like protein 1	Elavl1
1.57331	0.0416951	1.37991	O35386	Phytanoyl-CoA dioxygenase, peroxisomal	Phyh
1.57204	0.000280221	3.5525	Q8BVK9	Sp110 nuclear body protein	Sp110
1.55794	0.00132777	2.87688	Q8VI93;F7CXR7	2-5-oligoadenylate synthase 3	Oas3
1.54598	0.000128956	3.88956	Q61510;Q5SU71;Q5SU72	E3 ubiquitin/ISG15 ligase TRIM25	Trim25
1.54347	0.00642713	2.19198	Q8CGC7	Bifunctional glutamate/proline--tRNA ligase;Glutamate--tRNA ligase;Proline--tRNA ligase	Eprs
1.54295	0.00200892	2.69704	P97484;E9Q6M9	Leukocyte immunoglobulin-like receptor subfamily B member 3	Lilrb3
1.53724	1.61824e-05	4.79096	Q501J6;Q3U741;Q501J6-2	Probable ATP-dependent RNA helicase DDX17	Ddx17
1.53127	0.00722161	2.14137	Q8BPX9	Solute carrier family 15 member 3	Slc15a3
1.52696	7.93855e-09	8.10026	Q9D6M3;E9PV90;E9PY45;E9Q6M6;E9Q579;Q9DB41-2;Q9DB41;G3UX09;G3UY41	Mitochondrial glutamate carrier 1	Slc25a22
1.52143	6.2383e-05	4.20493	P63037;B1AXY1;B1AXY0;B1AXX9	DnaJ homolog subfamily A member 1	Dnaja1
1.51518	0.00758072	2.12029	Q3U0V1	Far upstream element-binding protein 2	Khsrp
1.51294	1.07421e-06	5.96891	P14824	Annexin A6	Anxa6
1.51274	1.46085e-05	4.83539	Q9QYS9-8;Q9QYS9-4;Q9QYS9-3;Q9QYS9-6;Q9QYS9-2;Q9QYS9;Q9QYS9-7;Q9QYS9-5	Protein quaking	Qki
1.50961	1.50871e-05	4.82139	Q9QYJ0	DnaJ homolog subfamily A member 2	Dnaja2
1.50812	0.000112612	3.94842	Q99LE6	ATP-binding cassette sub-family F member 2	Abcf2
1.50659	4.5917e-07	6.33803	P97379-2;P97379	Ras GTPase-activating protein-binding protein 2	G3bp2
1.50261	1.63564e-06	5.78631	Q99N69	Leupaxin	Lpxn
1.48511	1.78665e-06	5.74796	Q9JL15;A8DIL0;Q8C6H0	Galectin-8	Lgals8
1.48406	0.00713431	2.14665	P28667	MARCKS-related protein	Marcksl1
1.47741	0.000425448	3.37115	O88569-2;O88569;O88569-3	Heterogeneous nuclear ribonucleoproteins A2/B1	Hnrnpa2b1
1.47715	0.00997888	2.00092	P35123;Q99K46	Ubiquitin carboxyl-terminal hydrolase 4	Usp4
1.4578	7.25423e-06	5.13941	O09126	Semaphorin-4D	Sema4d
1.45398	0.000907741	3.04204	E9QA05;Q8C405;O35892;Q3U5P2;O35892-2;E9Q4Y0;D6RIJ4;F6WL90;Q99388	Nuclear autoantigen Sp-100	Sp100
1.45131	0.000650569	3.18671	Q9D1M0	Protein SEC13 homolog	Sec13
1.44113	5.49088e-07	6.26036	Q3TBT3;Q3TBT3-3;Q3TBT3-2	Stimulator of interferon genes protein	Tmem173
1.42735	0.00150761	2.82171	Q8R081;G5E924;G3UY38;G3UY56;G3UYY3	Heterogeneous nuclear ribonucleoprotein L	Hnrnpl
1.42478	0.0126081	1.89935	Q9JIA7	Sphingosine kinase 2	Sphk2
1.41891	3.82773e-06	5.41706	P08103;F6UND7;P08103-2	Tyrosine-protein kinase HCK	Hck
1.40216	1.15314e-05	4.93812	Q8BMP6	Golgi resident protein GCP60	Acbd3
1.40013	0.0014741	2.83147	E9Q987;D3Z3L3		Trim12c
1.3953	0.00158173	2.80087	Q5SUT0;Q61545;Q5SUS9;Q5SUS8	RNA-binding protein EWS	Ewsr1
1.3896	0.0103491	1.9851	Q9CQC9	GTP-binding protein SAR1b	Sar1b
1.38361	9.88626e-05	4.00497	Q61635		Ifi47
1.38213	0.0444232	1.35239	Q8BYK6-3;Q8BYK6;Q8BYK6-2	YTH domain family protein 3	Ythdf3
1.38186	4.39048e-05	4.35749	O08553;Q3TT92;Q62188;E9PWE8;D3YUS0;P97427;Q6P1J1	Dihydropyrimidinase-related protein 2	Dpysl2
1.37943	0.00517006	2.2865	O08688;D3YU84;D3Z432	Calpain-5	Capn5
1.37597	0.00342379	2.46549	F8WJG3;P62996	Transformer-2 protein homolog beta	Tra2b
1.37337	0.000580615	3.23611	P61211;F8WIB1;E9Q006	ADP-ribosylation factor-like protein 1	Arl1
1.37284	0.0202915	1.69269	E9PZJ8;E9PZJ8-2	Activating signal cointegrator 1 complex subunit 3	Ascc3
1.36945	0.0013554	2.86793	Q62523	Zyxin	Zyx
1.36812	0.0122451	1.91204	O35737;Q8C2Q7	Heterogeneous nuclear ribonucleoprotein H;Heterogeneous nuclear ribonucleoprotein H, N-terminally processed	Hnrnph1
1.36748	0.000160593	3.79427	Q8BGS7-2;Q8BGS7;D3Z5Y5;D3YX12	Choline/ethanolaminephosphotransferase 1	Cept1
1.36661	0.00167326	2.77644	Q9Z2X1-2;Q9Z2X1;J3QMQ5;J3QMT0;J3QM80;J3QP45	Heterogeneous nuclear ribonucleoprotein F;Heterogeneous nuclear ribonucleoprotein F, N-terminally processed	Hnrnpf;Gm6430
1.36474	0.00331119	2.48002	Q00PI9	Heterogeneous nuclear ribonucleoprotein U-like protein 2	Hnrnpul2
1.3631	0.000350805	3.45493	Q921F2;Q8R0B4;Q8BLD4;Q6VYI5;Q6VYI4	TAR DNA-binding protein 43	Tardbp
1.35261	0.0038266	2.41719	P34902;A2AGH5;B0QZX1	Cytokine receptor common subunit gamma	Il2rg;Gm20489
1.34687	0.0109795	1.95942	P56477;F6Z6C6;E9Q5T2	Interferon regulatory factor 5	Irf5
1.32323	0.00173498	2.7607	P13597-2;P13597	Intercellular adhesion molecule 1	Icam1
1.3149	0.00553298	2.25704	G3X9K9;G3UXZ5;P97371;G3UWN9;G3UXY0	Proteasome activator complex subunit 1	Psme1
1.3148	8.61029e-06	5.06498	Q2EMV9;Q2EMV9-2	Poly [ADP-ribose] polymerase 14	Parp14
1.31441	5.62132e-05	4.25016	Q62418-3;Q62418-2;Q62418	Drebrin-like protein	Dbnl
1.31316	0.00190599	2.71988	Q9QYI3;F7BTP8;A2A5E1	DnaJ homolog subfamily C member 7	Dnajc7
1.31181	0.00155616	2.80795	Q9EQ32-2;Q9EQ32;Q9EQ32-3	Phosphoinositide 3-kinase adapter protein 1	Pik3ap1
1.30122	2.83856e-07	6.5469	P11928;Q8VI95;Q924S2	2-5-oligoadenylate synthase 1A	Oas1a
1.29756	0.000238037	3.62335	P48025;E9PWE9	Tyrosine-protein kinase SYK;Tyrosine-protein kinase	Syk
1.29335	3.36727e-05	4.47272	Q9CZL2	Uncharacterized protein C4orf32 homolog
1.28758	0.00156224	2.80625	E9Q912;E9Q6Q4		Rap1gds1
1.28332	0.000712775	3.14705	Q61584-4;Q61584-3;Q61584;Q61584-5;Q61584-6;Q61584-2;Q61584-7	Fragile X mental retardation syndrome-related protein 1	Fxr1
1.27828	0.0131712	1.88037	Q9JMK0	Beta-1,4-galactosyltransferase 5	B4galt5
1.27707	0.0399056	1.39897	Q5NBU8;Q5NBU8-3	XIAP-associated factor 1	Xaf1
1.27274	0.00174445	2.75834	P25911;P16277	Tyrosine-protein kinase Lyn	Lyn
1.27103	0.0390217	1.40869	P26952-2;P26952;P26952-3	Interleukin-3 receptor subunit alpha	Il3ra
1.26831	4.54983e-05	4.342	P35700;B1AXW5;B1AXW6;B1AXW4	Peroxiredoxin-1	Prdx1
1.26398	0.00280422	2.55219	O70281;D3Z1F4	Protein-tyrosine sulfotransferase 1	Tpst1
1.25863	0.000431713	3.3648	E9QKL6		Ifi204
1.25221	7.34676e-05	4.1339	Q61166	Microtubule-associated protein RP/EB family member 1	Mapre1
1.24954	8.33309e-05	4.07919	Q8C172;H3BL08	Ceramide synthase 6	Cers6
1.24166	0.00224615	2.64856	P26011	Integrin beta-7	Itgb7
1.2351	0.00642137	2.19237	Q62093	Serine/arginine-rich splicing factor 2	Srsf2
1.23005	0.000911469	3.04026	O88685;A2AGN7;B7ZCF1;F6Q2E3	26S protease regulatory subunit 6A	Psmc3
1.22208	2.55677e-05	4.59231	Q8BVW3;Q8BVW3-2;Q8BVW3-3	Tripartite motif-containing protein 14	Trim14
1.21765	4.72942e-05	4.32519	Q9Z204-2;Q9Z204-4;Q9Z204-3;Q9Z204;Q9Z204-5	Heterogeneous nuclear ribonucleoproteins C1/C2	Hnrnpc
1.2116	0.00140447	2.85249	P62192	26S protease regulatory subunit 4	Psmc1
1.21039	0.000370211	3.43155	Q80YW0	Cytohesin-4	Cyth4
1.20609	0.0132612	1.87742	Q6WVG3;Q8C7J6;Q50H33-2;Q50H33	BTB/POZ domain-containing protein KCTD12	Kctd12
1.20488	2.0835e-06	5.68121	E9Q8I7;E9PZN0;E9Q3K1		Nfxl1
1.20365	0.000145058	3.83846	Q8BU31;Q80ZJ1-2	Ras-related protein Rap-2c	Rap2c
1.19918	2.05955e-05	4.68623	D3Z3W9;F8VQ94		Pira2
1.19829	1.03615e-05	4.98458	Q9R0E1;F6W3Q8	Procollagen-lysine,2-oxoglutarate 5-dioxygenase 3	Plod3
1.19588	1.14963e-05	4.93944	Q921T2-2;F6YC07;Q921T2;Q921T2-3;E9PWW2;J3QQ40;D3YZP0;D3YZJ9;D3YXF8	Torsin-1A-interacting protein 1	Tor1aip1
1.18083	0.000130997	3.88274	Q6A0A9;Q8C3F2-3;Q8C3F2	Constitutive coactivator of PPAR-gamma-like protein 1	FAM120A
1.18074	0.048472	1.31451	P14483;P06346;P06344;P06345;P06343	H-2 class II histocompatibility antigen, A beta chain;H-2 class II histocompatibility antigen, A-F beta chain;H-2 class II histocompatibility antigen, A-U beta chain;H-2 class II histocompatibility antigen, A-S beta chain;H-2 class II histocompatibility antigen, A-K beta chain	H2-Ab1
1.18061	0.00192745	2.71502	P21107-2;D3Z2H9;D3Z6I8;Q8K0Z5;E9Q5J9;D3YVR0;E9Q448;B7ZNL3		Tpm3-rs7;Tpm3
1.18031	0.0076328	2.11732	P14106	Complement C1q subcomponent subunit B	C1qb
1.17933	0.00129259	2.88854	Q3UKC1;D3Z715;D3Z213	Tax1-binding protein 1 homolog	Tax1bp1
1.17599	9.69404e-05	4.0135	Q9Z1Z2	Serine-threonine kinase receptor-associated protein	Strap
1.17393	0.000229722	3.6388	Q02053;P31254	Ubiquitin-like modifier-activating enzyme 1	Uba1
1.17201	0.000914628	3.03876	B1AXN9;P18654;B1AXP0;Q7TPS0-2;A2CEE6;Q7TPS0-3;A2CEE5;Q7TPS0;E9PUP0;A2CEE7;E9QK39;B1AXN8;B1AXN5;B1AXN7;F6UG16;B2GVN8	Ribosomal protein S6 kinase alpha-3	Rps6ka3
1.17129	0.000530037	3.27569	Q8VIJ6	Splicing factor, proline- and glutamine-rich	Sfpq
1.17118	0.0461204	1.33611	Q8CII9-2;Q8CII9;Q8CII9-3	Cytokine receptor-like factor 2	Crlf2
1.17045	1.1092e-06	5.95499	Q60715-2;E9Q7B0		P4ha1
1.16762	8.75208e-06	5.05789	Q64281-2;Q64281	Leukocyte immunoglobulin-like receptor subfamily B member 4	Lilrb4
1.15955	0.00205548	2.68709	Q61735-2;Q61735	Leukocyte surface antigen CD47	Cd47
1.15099	4.75244e-05	4.32308	Q00612;A3KG36;P97324;G3UWD6	Glucose-6-phosphate 1-dehydrogenase X;Glucose-6-phosphate 1-dehydrogenase	G6pdx
1.14823	0.000187017	3.72812	P61979-3;B2M1R6;P61979;P61979-2;H3BKD0;D3Z5X4;D3YWG1;H3BK96;H3BKI8;Q8BT23;H3BJ43;H3BLP7	Heterogeneous nuclear ribonucleoprotein K	Hnrnpk;Gm7964
1.14106	0.0279338	1.55387	Q9D8T4	Golgi apparatus membrane protein TVP23 homolog B	Tvp23b
1.14058	0.0013312	2.87576	Q922B2;Q8BJY7	Aspartate--tRNA ligase, cytoplasmic	Dars
1.13751	0.0369221	1.43271	Q3U5V8;Q9D3G5	Syntaxin-11	Stx11
1.13561	1.74116e-05	4.75916	O35239	Tyrosine-protein phosphatase non-receptor type 9	Ptpn9
1.13484	0.00119734	2.92178	Q9CQW9;E9Q0C7	Interferon-induced transmembrane protein 3	Ifitm3
1.1342	0.000323397	3.49026	Q8CHG5;E9PZX5;E9PY98	Protein KIAA0317	Kiaa0317;1110018G07Rik
1.12863	0.000468141	3.32962	Q8BHD7;Q8BHD7-2;G8JL74;G3UXA6;G3UZ01;F7C521;G3UXZ8;G3UY95	Polypyrimidine tract-binding protein 3	Ptbp3
1.1276	0.000115226	3.93845	Q61656;Q8BTS0;B1ARB9;B1ARC0;B1ARB8	Probable ATP-dependent RNA helicase DDX5	Ddx5
1.12568	0.000247311	3.60676	Q91VR5	ATP-dependent RNA helicase DDX1	Ddx1
1.11621	0.0014235	2.84664	Q61171;D3Z4A4	Peroxiredoxin-2	Prdx2
1.11163	0.0148752	1.82754	Q8CIH5	1-phosphatidylinositol 4,5-bisphosphate phosphodiesterase gamma-2	Plcg2
1.11111	6.22797e-05	4.20565	P16045	Galectin-1	Lgals1
1.11048	4.36053e-09	8.36046	P41216;D3Z041;D3Z457;D3YVF6;F6WNZ2	Long-chain-fatty-acid--CoA ligase 1	Acsl1
1.10686	0.000368488	3.43358	Q99LF4	tRNA-splicing ligase RtcB homolog	D10Wsu52e
1.10346	0.0202779	1.69298	Q99020;Q80XR6;Q20BD0	Heterogeneous nuclear ribonucleoprotein A/B	Hnrnpab
1.10159	0.00371319	2.43025	Q9WUP4;F6WPW1;Q9WUP4-2	Polyprenol reductase	Srd5a3
1.09706	0.000555797	3.25508	P68134;P68033;P63268;P62737;D3YZY0;D3Z2K3	Actin, alpha skeletal muscle;Actin, alpha cardiac muscle 1;Actin, gamma-enteric smooth muscle;Actin, aortic smooth muscle	Acta1;Actc1;Actg2;Acta2
1.08518	0.00233377	2.63194	Q3TW96;Q3TW96-2;Q91YN5-2;Q91YN5-3;Q91YN5;Q3UHZ7	UDP-N-acetylhexosamine pyrophosphorylase-like protein 1	Uap1l1
1.0798	0.00161843	2.79091	Q9DC50	Peroxisomal carnitine O-octanoyltransferase	Crot
1.05998	0.00143717	2.84249	P27808;J3JS24	Alpha-1,3-mannosyl-glycoprotein 2-beta-N-acetylglucosaminyltransferase	Mgat1
1.05767	0.000243549	3.61341	Q62192;F2Z425;E9Q009	CD180 antigen	Cd180
1.05402	0.0119976	1.92091	Q9D0E1-2;Q9D0E1;B8JK33;B8JK32;F6W322;F7C9U3	Heterogeneous nuclear ribonucleoprotein M	Hnrnpm
1.05342	0.000215889	3.66577	Q8BYU6	Torsin-1A-interacting protein 2	Tor1aip2
1.04803	0.00177498	2.75081	Q3U466;D6RE34;F6SXC2		Cln6
1.04434	6.10465e-05	4.21434	Q7TMK9-2;Q7TMK9;G3UZI2;G3V018;G3UZ48;G3UXJ6;G3UWM1;G3XA76;G3UXU5	Heterogeneous nuclear ribonucleoprotein Q	Syncrip
1.04309	2.72131e-05	4.56522	E9PWG2;E9PY51		Trappc8
1.04111	0.0155145	1.80926	Q9D0K1;D6RH41	Peroxisomal membrane protein PEX13	Pex13
1.03842	0.0174821	1.75741	E9QAT4;A2AIX1;F7BPW6		Sec16a
1.03746	0.0154385	1.81139	E9Q066;Q8BWW4;G3X9Q6	La-related protein 4	Larp4
1.03297	0.0498439	1.30239	P27048;P63163	Small nuclear ribonucleoprotein-associated protein B;Small nuclear ribonucleoprotein-associated protein N	Snrpb;Snrpn
1.03165	2.82673e-05	4.54872	Q99K70;B1AWT2;Q7TT45;B1AWT3;B1AWT4;Q99K70-2	Ras-related GTP-binding protein C	Rragc
1.02936	0.00981413	2.00815	Q8K2L8;Q8C0C3	Trafficking protein particle complex subunit 12	Trappc12
1.02387	8.0547e-06	5.09395	Q8VDJ3	Vigilin	Hdlbp
1.02006	0.00399101	2.39892	P11276	Fibronectin;Anastellin	Fn1
1.01108	0.00198898	2.70137	Q14CH1	Molybdenum cofactor sulfurase	Mocos
1.00951	0.00178535	2.74828	Q8BG32;G3UYH2;G3UX67;G3UWV7;G3UYL8;G3UX15;G3UYI4;G3UYL3;G3UWW7;G3UXL5;G3UZ28;G3UZ33	26S proteasome non-ATPase regulatory subunit 11	Psmd11
1.00172	0.00577584	2.23838	J3QP68;P28656;E9PW66	Nucleosome assembly protein 1-like 1	Gm4204;Nap1l1
1	0.00128699	2.89042	P17710-3;G3UVV4;P17710-4;P17710;P17710-2;D3YYR4;D3Z365;D3Z105;B4YB29;F6QD41	Hexokinase-1	Hk1
5.33923	0.053301	1.27326	Q91Z40		Gbp7
2.47056	0.0577065	1.23878	Q6PE80;Q00993;F6YPR4	Tyrosine-protein kinase receptor UFO	Axl
1.61302	0.149818	0.824435	D3Z090;P07141-2;P07141	Macrophage colony-stimulating factor 1;Processed macrophage colony-stimulating factor 1	Csf1
1.52959	0.151062	0.820844	Q8CGB3;Q8CGB3-3;Q8CGB3-2	Uveal autoantigen with coiled-coil domains and ankyrin repeats	Uaca
1.37203	0.324609	0.488639	E9Q557;E9PZW0	Desmoplakin	Dsp
1.35751	0.12777	0.89357	P68181-4;P68181-2;P68181-3;P68181;P05132-2;P05132	cAMP-dependent protein kinase catalytic subunit beta	Prkacb
1.32662	0.127675	0.893894	E9PV44;O35143	ATPase inhibitor, mitochondrial	Atpif1
1.31418	0.0771812	1.11249	Q6P1F6;Q925E7;F6RV17;Q6ZWR4-3;Q6ZWR4;Q6ZWR4-2;G3UZP6;G3UXS9;Q8BG02	Serine/threonine-protein phosphatase 2A 55 kDa regulatory subunit B alpha isoform;Serine/threonine-protein phosphatase 2A 55 kDa regulatory subunit B delta isoform	Ppp2r2a;Ppp2r2d
1.20525	0.0745841	1.12735	Q922Y1	UBX domain-containing protein 1	Ubxn1
1.16025	0.0972947	1.01191	Q8R010;Q8R3V2	Aminoacyl tRNA synthase complex-interacting multifunctional protein 2	Aimp2
1.15164	0.3086	0.510604	Q9DCF9-2;Q9DCF9	Translocon-associated protein subunit gamma	Ssr3
1.10974	0.124347	0.905365	Q80VP0;Q80VP0-2	Tectonin beta-propeller repeat-containing protein 1	Tecpr1
1.07898	0.196874	0.705812	P62984;E9Q9J0;J3QK04;E9Q5F6;Q5SX22;P0CG49;P0CG50	Ubiquitin-60S ribosomal protein L40;Ubiquitin;60S ribosomal protein L40;Polyubiquitin-B;Ubiquitin;Polyubiquitin-C;Ubiquitin;Ubiquitin-related 1;Ubiquitin-related 2	Uba52;Gm7808;Ubc;Ubb
1.07278	0.216383	0.664777	Q9Z2A7;F6UUI9;F6V8W6	Diacylglycerol O-acyltransferase 1	Dgat1
1.04592	0.064735	1.18886	D6RE20;Q8CET7;Q80TA1	Ethanolaminephosphotransferase 1	Ept1
1.04434	0.0971433	1.01259	Q921J2	GTP-binding protein Rheb	Rheb
1.04041	0.0951505	1.02159	Q9D7S9	Charged multivesicular body protein 5	Chmp5
1.0337	0.122748	0.910986	P26954;P26955	Interleukin-3 receptor class 2 subunit beta	Csf2rb2
1.03068	0.0516288	1.28711	P56379	6.8 kDa mitochondrial proteolipid	Mp68
1.02233	0.0560971	1.25106	P35294	Ras-related protein Rab-19	Rab19
0.997104	0.000370271	3.43148	O35955	Proteasome subunit beta type-10	Psmb10
0.991359	0.00055106	3.2588	Q9JJ28	Protein flightless-1 homolog	Flii
0.9909	0.00436056	2.36046	Q9Z1Q5	Chloride intracellular channel protein 1	Clic1
0.990104	0.010808	1.96626	P20491	High affinity immunoglobulin epsilon receptor subunit gamma	Fcer1g
0.987989	0.0150374	1.82283	Q8VDM4;J3KMQ2;E9Q2S8	26S proteasome non-ATPase regulatory subunit 2	Psmd2;Gm5422
0.987057	0.00433872	2.36264	Q60749	KH domain-containing, RNA-binding, signal transduction-associated protein 1	Khdrbs1
0.982613	0.0110363	1.95718	Q5UE59;E9Q7C9;Q7TNF4;Q8CD76;O88447;O88448;D3YXZ3;Q91YS4;F6UYN4;Q9DBS5;D3Z710;Q91W40	Kinesin light chain 1	Klc1
0.982149	0.0436941	1.35958	Q9WUK2-2;Q9WUK2	Eukaryotic translation initiation factor 4H	Eif4h
0.978451	4.42562e-06	5.35403	P58252;G3UXK8	Elongation factor 2	Eef2
0.978251	0.000537297	3.26979	P63330;P62715	Serine/threonine-protein phosphatase 2A catalytic subunit alpha isoform;Serine/threonine-protein phosphatase 2A catalytic subunit beta isoform	Ppp2ca;Ppp2cb
0.977405	0.0244508	1.61171	Q60668-3;Q60668;F6ZV59;Q60668-4;G5E8G0;Q60668-2;G3X9W0;E9Q5B6;F6SHF3;Q9D3U4	Heterogeneous nuclear ribonucleoprotein D0	Hnrnpd
0.972286	0.000334402	3.47573	Q3U2G2;Q61316;E0CY23;Q61699-2;P48722-2;E9Q0U7;P48722;Q61699	Heat shock 70 kDa protein 4	Hspa4
0.96994	0.0010462	2.98038	Q80X50-2;Q80X50-4;Q80X50;Q80X50-5;Q80X50-3	Ubiquitin-associated protein 2-like	Ubap2l
0.967614	1.26091e-05	4.89932	P06151;G5E8N5;D3Z736;D3YZQ9;D3YVR7;D3YZE4;P00342;D3Z7F0;P16125	L-lactate dehydrogenase A chain;L-lactate dehydrogenase	Ldha
0.96718	7.7713e-05	4.10951	Q9DCT5	Stromal cell-derived factor 2	Sdf2
0.965258	0.175196	0.756477	Q91XE8	Transmembrane protein 205	Tmem205
0.964632	3.35291e-05	4.47458	P35282	Ras-related protein Rab-21	Rab21
0.964287	0.0228316	1.64146	P70429;P70429-2;F8WJB9;E9PVP4	Ena/VASP-like protein	Evl
0.963962	0.00120398	2.91938	P14685;F7B7L8	26S proteasome non-ATPase regulatory subunit 3	Psmd3
0.960469	0.000298164	3.52555	Q8K124	Pleckstrin homology domain-containing family O member 2	Plekho2
0.959778	0.000124877	3.90352	Q8CBM2;A2AL85;Q8BSY0;A2AL77;A2AL75;Q3TU40;A2AL81	Aspartyl/asparaginyl beta-hydroxylase	Asph
0.957155	0.0168653	1.77301	Q8R3Q0	Store-operated calcium entry-associated regulatory factor	Tmem66
0.955719	0.448907	0.347844	Q02257	Junction plakoglobin	Jup
0.951745	0.000730534	3.13636	P07356;B0V2N7;B0V2N8;B0V2N5	Annexin A2	Anxa2
0.951134	0.0745883	1.12733	Q68FL6;E9QB02;F6W0G8	Methionine--tRNA ligase, cytoplasmic	Mars
0.950399	8.23818e-10	9.08417	Q8BN21;Q8BN21-2;Q8BN21-3;Q5SP86	Serine/threonine-protein kinase VRK2	Vrk2
0.941158	0.000185459	3.73175	P17751;H7BXC3	Triosephosphate isomerase	Tpi1
0.940217	0.00227985	2.64209	P00493	Hypoxanthine-guanine phosphoribosyltransferase	Hprt1
0.938607	0.00575158	2.24021	Q8K1T1	Leucine-rich repeat-containing protein 25	Lrrc25
0.93752	0.0822489	1.08487	P51807	Dynein light chain Tctex-type 1	Dynlt1
0.935576	0.0273602	1.56288	Q8BLR5	PH and SEC7 domain-containing protein 4	Psd4
0.931163	0.154247	0.811784	Q8K2Q7;J3KMJ4;Q8K2Q7-2	BRO1 domain-containing protein BROX	Brox
0.928976	0.00881081	2.05498	P14152;B1ATQ3	Malate dehydrogenase, cytoplasmic	Mdh1
0.92489	0.042749	1.36907	Q62419;Q8BXU5;Q62420;A2ALV3;F6ZL13;A2ALV1	Endophilin-A2	Sh3gl1
0.922896	0.0103398	1.98549	Q6ZQ58;J3QNB1;Q6ZQ58-2	La-related protein 1	Larp1
0.920349	0.0100125	1.99946	Q9D0R8	Protein LSM12 homolog	Lsm12
0.919676	5.76206e-05	4.23942	Q922H2	[Pyruvate dehydrogenase [lipoamide]] kinase isozyme 3, mitochondrial	Pdk3
0.918035	0.000501159	3.30002	B2RXC1	Trafficking protein particle complex subunit 11	Trappc11
0.916238	0.0184984	1.73286	Q8BFZ3	Beta-actin-like protein 2	Actbl2
0.915091	0.032586	1.48697	P62862;Q642K5	40S ribosomal protein S30	Fau
0.912015	0.00576943	2.23887	P97814	Proline-serine-threonine phosphatase-interacting protein 1	Pstpip1
0.911206	0.169235	0.77151	Q9D3B1	Very-long-chain (3R)-3-hydroxyacyl-[acyl-carrier protein] dehydratase 2	Ptplb
0.907637	0.011287	1.94742	O88188	Lymphocyte antigen 86	Ly86
0.900682	0.000623887	3.20489	P40336;P40336-2	Vacuolar protein sorting-associated protein 26A	Vps26a
0.899831	6.55153e-05	4.18366	E9PUQ9;E2JF22;F7AC58;F6PYU5;F6QY99	Piezo-type mechanosensitive ion channel component 1	Piezo1
0.897988	0.0268694	1.57074	Q6F5F2		Sirpb1a
0.893961	0.00176392	2.75352	Q60875-5;H3BJU7;Q60875-4;H3BJX8;H3BJ45;H3BJ40;H3BKH9;Q60875;Q60875-3;Q60875-2;H3BL15;H3BLF9;H3BJ59;H3BLJ1;H3BIX8;H3BJM4;H3BJ48	Rho guanine nucleotide exchange factor 2	Arhgef2
0.890336	0.000750552	3.12462	O54918;O54918-2;O54918-3;Q6PEB3	Bcl-2-like protein 11	Bcl2l11
0.887736	0.0922948	1.03482	O35566	CD151 antigen	Cd151
0.881142	3.09914e-08	7.50876	Q921H8;H3BKL5;H3BJZ9;Q8VCH0;H3BKA1;H3BJG8;H3BJC1	3-ketoacyl-CoA thiolase A, peroxisomal;3-ketoacyl-CoA thiolase B, peroxisomal	Acaa1a;Acaa1b
0.879807	0.0141412	1.84951	O35286;Q05BH3;G3X8X0	Putative pre-mRNA-splicing factor ATP-dependent RNA helicase DHX15	Dhx15
0.877388	0.014979	1.82452	P49586;D3Z3T5;Q811Q9-2;Q811Q9	Choline-phosphate cytidylyltransferase A	Pcyt1a
0.874203	0.000289976	3.53764	Q9D8B3	Charged multivesicular body protein 4b	Chmp4b
0.872909	0.00187628	2.7267	P61164	Alpha-centractin	Actr1a
0.870305	0.111254	0.953683	Q9R117;E9QJS1	Non-receptor tyrosine-protein kinase TYK2;Tyrosine-protein kinase	Tyk2
0.869086	0.0342878	1.46486	Q9WVL3;Q9WVL3-2	Solute carrier family 12 member 7	Slc12a7
0.867777	0.0267083	1.57335	Q8CDG3-2;Q8CDG3	Deubiquitinating protein VCIP135	Vcpip1
0.867254	0.0173151	1.76157	Q91WK2	Eukaryotic translation initiation factor 3 subunit H	Eif3h
0.862591	0.0161633	1.79147	P54729	NEDD8 ultimate buster 1	Nub1
0.857141	0.276617	0.558122	Q5FWI3	Transmembrane protein 2	Tmem2
0.856459	0.00235758	2.62753	Q60865;F6YLI0;F6YP03;A2BH47	Caprin-1	Caprin1
0.854	0.000706796	3.15071	Q8R079;D6RG73;Q8R079-2	Bifunctional apoptosis regulator	Bfar
0.852578	0.0479138	1.31954	P50637	Translocator protein	Tspo
0.851429	0.00123453	2.9085	A2AF47;A2AF67;A2AF65	Dedicator of cytokinesis protein 11	Dock11
0.851278	0.000213887	3.66981	Q9D1A2	Cytosolic non-specific dipeptidase	Cndp2
0.850829	0.000594986	3.22549	P13020-2;P13020;A6PWS5	Gelsolin	Gsn
0.849694	0.0011691	2.93215	Q80X95;Q6NTA4;G3UYP1	Ras-related GTP-binding protein A;Ras-related GTP-binding protein B	Rraga;Rragb
0.846741	0.0758385	1.12011	P62046	Leucine-rich repeat and calponin homology domain-containing protein 1	Lrch1
0.845043	0.0320862	1.49368	Q99J83	Autophagy protein 5	Atg5
0.844569	0.00185501	2.73165	A2A6Z2;Q6SJQ7-2;Q6SJQ7;Q6SJQ7-3;Q8VCH2	CMRF35-like molecule 1	Cd300lf
0.83916	0.0219918	1.65774	P97369;A8XU21	Neutrophil cytosol factor 4	Ncf4
0.834549	0.0223578	1.65057	P97465	Docking protein 1	Dok1
0.834294	0.0312878	1.50462	E9PVJ6;E9Q4I1;E9Q612	Receptor-type tyrosine-protein phosphatase O	Ptpro
0.831745	3.33897e-05	4.47639	A6X919;A6X919-2;A6X919-3;P0CW70	Probable C-mannosyltransferase DPY19L1	Dpy19l1
0.830503	0.0231924	1.63465	D3Z656;Q8CHC4;E9Q7S0;F7BQW7;D3Z1M7	Synaptojanin-1	Synj1
0.830133	0.0119246	1.92356	Q6SJQ5;A2A7W1;L7N207;A2A7W0	CMRF35-like molecule 3	Cd300lh;Gm11709
0.825374	0.0188785	1.72403	P58682;A2AHI8	Toll-like receptor 8	Tlr8
0.824715	0.00462085	2.33528	P35991;A2BDW0	Tyrosine-protein kinase BTK	Btk
0.824619	0.000612188	3.21312	P62196;Q8K1K2	26S protease regulatory subunit 8	Psmc5
0.819782	0.00223855	2.65003	O35295	Transcriptional activator protein Pur-beta	Purb
0.817056	0.00152747	2.81603	Q9CZD3	Glycine--tRNA ligase	Gars
0.813161	0.00102526	2.98917	Q64012-2;A2AU62;Q64012;A2AU61;A2AU60	RNA-binding protein Raly	Raly
0.813059	0.00065137	3.18617	Q9CQD1	Ras-related protein Rab-5A	Rab5a
0.812287	0.00499655	2.30133	Q8VEK3;G3XA10	Heterogeneous nuclear ribonucleoprotein U	Hnrnpu
0.811973	3.13791e-05	4.50336	Q3TFQ1;Q3UBW1	SPRY domain-containing protein 7	Spryd7
0.811149	4.32828e-05	4.36368	Q9Z1Q2;G3UXA4;G3UZK8;G3UX11;G3XA64;G3UYU8;Q80YU0	Abhydrolase domain-containing protein 16A	Abhd16a
0.807561	0.0030582	2.51453	Q9QZD9;A2AE03	Eukaryotic translation initiation factor 3 subunit I	Eif3i
0.806888	0.000898318	3.04657	P62960;A2BGG7;Q9Z2C8-2;B2RUF0;Q9Z2C8	Nuclease-sensitive element-binding protein 1	Ybx1
0.804071	0.00100067	2.99971	Q3UJB9;G5E896;D6RE33;Q3UJB9-2;F6ZJ27	Enhancer of mRNA-decapping protein 4	Edc4
0.802455	0.00232949	2.63274	D3Z1Y1;Q9DBY1;E9QQ99;Q9DBY1-2;D3YZH4	E3 ubiquitin-protein ligase synoviolin	Syvn1
0.802034	0.0259124	1.58649	P46467	Vacuolar protein sorting-associated protein 4B	Vps4b
0.801092	0.01325	1.87778	Q9WUA3;Q8C605;Q9WUA3-2;D3YUA3;F6YL81	6-phosphofructokinase type C;6-phosphofructokinase	Pfkp
0.800843	0.0028754	2.5413	Q3TXS7;J3QN38	26S proteasome non-ATPase regulatory subunit 1	Psmd1
0.800221	0.386102	0.413298	Q9R1X5;F8WJ10	Multidrug resistance-associated protein 5	Abcc5
0.800121	0.00102191	2.99059	Q8CI51;Q8CI51-2;Q9CRA2;Q8CI51-3;F8WJI6;E9Q8P5	PDZ and LIM domain protein 5	Pdlim5
0.796117	0.0039504	2.40336	F6RJV6;Q9JJK2	LanC-like protein 2	Lancl2
0.79157	0.210598	0.676546	P97311	DNA replication licensing factor MCM6	Mcm6
0.790992	0.00755545	2.12174	Q8BMS9;A2APB1;A2AVI0	Ras association domain-containing protein 2	Rassf2
0.79074	0.186636	0.729004	Q91VM5;Q9WV02;Q9WV02-2;A2AFI3;A2AFI4;Q9DAE2	RNA binding motif protein, X-linked-like-1;RNA-binding motif protein, X chromosome;RNA-binding motif protein, X chromosome, N-terminally processed	Rbmxl1;Rbmx
0.790512	0.00960404	2.01755	Q3UFK8;D3Z5B2	FERM domain-containing protein 8	Frmd8
0.788953	0.0442798	1.35379	Q8CIE4;F6Z9X8		Parp10
0.787981	0.0464304	1.3332	G5E8J0;O35516;O35516-2;Q01705-2;Q01705-4;Q01705-3;Q01705	Neurogenic locus notch homolog protein 2;Notch 2 extracellular truncation;Notch 2 intracellular domain	Notch2
0.78737	0.0102647	1.98865	Q80X41-2;Q80X41-5;Q80X41-3;Q80X41	Serine/threonine-protein kinase VRK1	Vrk1
0.784746	0.000398494	3.39958	Q9JJI8	60S ribosomal protein L38	Rpl38
0.783987	0.00940119	2.02682	Q99KJ8	Dynactin subunit 2	Dctn2
0.780751	0.0124709	1.9041	Q8BVL3;D3Z7S9;H3BKQ6;D3Z3J1;H3BKG9	Sorting nexin-17	Snx17
0.778661	0.123519	0.908266	P62334	26S protease regulatory subunit 10B	Psmc6
0.773708	0.139665	0.854912	P32067;F6SXM5;D6RI87;A2AR07	Lupus La protein homolog	Ssb
0.772848	0.00100661	2.99714	Q9EQH3	Vacuolar protein sorting-associated protein 35	Vps35
0.772827	0.0885599	1.05276	Q7TMM9	Tubulin beta-2A chain	Tubb2a
0.771256	0.0121071	1.91696	Q3UPV6;P62482;E0CXZ9;E0CXI4;E0CYS2;F6U2R9;Q3U6C5;Q8CD65;Q9D5E9;P63143	Voltage-gated potassium channel subunit beta-2	Kcnab2
0.769205	0.000456471	3.34059	F8WIV2;Q60854;K7E6F1;E9Q3Y1;E9Q6X2;E9Q108;E9Q0P9;E9PYY0;E9PZQ9;E9Q4R2	Serpin B6	Serpinb6a;Serpinb6
0.766156	0.00224526	2.64873	P28740-2;P28740;P28740-1;E0CZ72;F8VQ42;Q9D481;F6SUU5;Q8C0N1;Q3TTL2;Q922S8	Kinesin-like protein KIF2A	Kif2a
0.761931	0.0177731	1.75024	P84078;P61205;Q8BSL7;A2A6T9	ADP-ribosylation factor 1;ADP-ribosylation factor 3;ADP-ribosylation factor 2	Arf1;Arf3;Arf2
0.760807	0.00069975	3.15506	Q9Z0S9	Prenylated Rab acceptor protein 1	Rabac1
0.760592	0.0075293	2.12325	Q3UZ39;Q3UZ39-3	Leucine-rich repeat flightless-interacting protein 1	Lrrfip1
0.758611	0.000957368	3.01892	P10126;D3YZ68;D3Z3I8;P62631	Elongation factor 1-alpha 1	Eef1a1
0.758017	0.000411268	3.38587	Q9D1R9;D3YWC0	60S ribosomal protein L34	Rpl34
0.754677	0.00120343	2.91958	Q61768;E9QAK5;P28738;P33175	Kinesin-1 heavy chain	Kif5b
0.75421	0.150314	0.823001	Q80VD1	Protein FAM98B	Fam98b
0.753525	0.0203728	1.69095	P39688-2;D3YZ57;P39688;D3YVZ0;D3YZA2;P06240;E9Q696	Tyrosine-protein kinase Fyn	Fyn
0.751571	0.00986697	2.00582	Q8VDW0;Q8VDW0-2;D6RHT5	ATP-dependent RNA helicase DDX39A	Ddx39a
0.751388	0.00269944	2.56873	Q9DBC7;D3Z4L4;A2AI69;D3YTM5;D3Z068;D3Z0V6;P12849	cAMP-dependent protein kinase type I-alpha regulatory subunit;cAMP-dependent protein kinase type I-alpha regulatory subunit, N-terminally processed	Prkar1a
0.750978	0.000172174	3.76403	P63328-2;P63328;E9Q6P2;G3X8U7;P48453-2;E0CZ78;P48453;P48455	Serine/threonine-protein phosphatase 2B catalytic subunit alpha isoform;Serine/threonine-protein phosphatase;Serine/threonine-protein phosphatase 2B catalytic subunit beta isoform	Ppp3ca;Ppp3cb
0.750974	0.00496706	2.3039	P34022;H7BX22	Ran-specific GTPase-activating protein	Ranbp1
0.750329	5.16519e-06	5.28691	A2ARZ7;P35285	Ras-related protein Rab-22A	Rab22a
0.747954	0.0610523	1.2143	Q3TRM8;E9Q8S8;E9Q3Z4;D6RFA3;D3Z2E4;D6RCV7	Hexokinase-3	Hk3
0.747637	0.000323086	3.49068	Q8BUE4;Q8BUE4-2	Apoptosis-inducing factor 2	Aifm2
0.746468	0.000512589	3.29023	Q3TYS2;E9PZ42;E9Q3W5	Uncharacterized protein C17orf62 homolog
0.745427	0.0131923	1.87968	P63085;F6VEI7	Mitogen-activated protein kinase 1	Mapk1
0.74384	9.89026e-06	5.00479	O70252;D3YX62;D3YXN4	Heme oxygenase 2	Hmox2
0.74314	0.0260695	1.58387	P84084;D3YV25;E9Q2C2	ADP-ribosylation factor 5	Arf5
0.742701	0.000250966	3.60039	Q9R0M6;A2AFP5;Q8BHH2	Ras-related protein Rab-9A	Rab9a;Rab9
0.74233	0.30393	0.517227	Q7JCZ3;P00158	Cytochrome b	mt-Cytb;Mt-Cyb
0.742278	0.00123106	2.90972	Q8R5H1-5;Q8R5H1-2;Q8R5H1;Q8R5H1-3;Q8R5H1-4	Ubiquitin carboxyl-terminal hydrolase 15	Usp15
0.741311	0.00799383	2.09725	Q31093		H2-M3
0.738949	0.00522759	2.2817	Q3TRH2;Q9D8W5;B1AT36	26S proteasome non-ATPase regulatory subunit 12	Psmd12
0.73772	0.0188239	1.72529	Q6PHZ2-2;Q6PHZ2-4;Q6PHZ2;Q6PHZ2-5;E9Q1V9;E9Q1T1;E9PXV3;E9Q1W0;Q8CCM0;P11798;F8WIS9;F6ZIE1;F6RWZ9;F7A856;E9QAJ4;D6RDQ8;E9PYZ8;F6WHR9	Calcium/calmodulin-dependent protein kinase type II subunit delta	Camk2d
0.737476	0.0441897	1.35468	Q60770;Q60770-2;E9Q6R9;A2AEC9	Syntaxin-binding protein 3	Stxbp3
0.735621	0.000508026	3.29411	P70441	Na(+)/H(+) exchange regulatory cofactor NHE-RF1	Slc9a3r1
0.733824	0.0495438	1.30501	E9Q4K7;Q9EQW7;F8VQ75		Kif13b
0.73343	0.0416412	1.38048	O35226-4;O35226;O35226-5;O35226-3;O35226-2	26S proteasome non-ATPase regulatory subunit 4	Psmd4
0.731804	0.0101271	1.99451	Q6P542	ATP-binding cassette sub-family F member 1	Abcf1
0.731633	0.0329224	1.48251	A2AAN2;Q8BMA6	Signal recognition particle subunit SRP68	Srp68
0.731627	6.31328e-05	4.19975	Q9ER39	Torsin-1A	Tor1a
0.731064	0.00293936	2.53175	Q3TGG2;Q7TQH0-2;Q7TQH0-3;Q7TQH0;E9Q5Q0;J3QP59	Ataxin-2-like protein	Atxn2l
0.730682	0.000707685	3.15016	Q8C845;Q9D8Y0;Q9D4J1	EF-hand domain-containing protein D2	Efhd2
0.730142	0.0122655	1.91131	Q5NCF2;B1ASW5;B1ASW6	Trafficking protein particle complex subunit 1	Trappc1
0.728226	0.0317339	1.49848	Q8R0J7	Vacuolar protein sorting-associated protein 37B	Vps37b
0.721481	0.00418439	2.37837	Q78PY7;Q3TJ56;E9Q3E9	Staphylococcal nuclease domain-containing protein 1	Snd1
0.721339	0.0165749	1.78055	E9Q1Z6		Gm14548
0.720306	9.31635e-06	5.03075	P35278;Q8C266;A2A5F5;A2A5F6	Ras-related protein Rab-5C	Rab5c
0.720096	0.200867	0.697092	P12815	Programmed cell death protein 6	Pdcd6
0.719656	0.00376751	2.42395	D3YW48;O88456	Calpain small subunit 1	Capns1
0.719372	0.0290413	1.53698	P54823	Probable ATP-dependent RNA helicase DDX6	Ddx6
0.715062	0.0201758	1.69517	Q9WTK5	Nuclear factor NF-kappa-B p100 subunit;Nuclear factor NF-kappa-B p52 subunit	Nfkb2
0.712925	0.0273973	1.56229	Q6PDM2;H7BX95;Q6PDM2-3;Q6PDM2-2;F7AI47	Serine/arginine-rich splicing factor 1	Srsf1
0.711233	1.17426e-05	4.93023	P61027	Ras-related protein Rab-10	Rab10
0.710498	0.122446	0.912054	Q8BHZ0	Protein FAM49A	Fam49a
0.708358	0.000958583	3.01837	Q9ES56	Trafficking protein particle complex subunit 4	Trappc4
0.708264	0.0636948	1.1959	Q9ER80	Receptor-transporting protein 4	Rtp4
0.707225	0.00378777	2.42162	Q8VD65	Phosphoinositide 3-kinase regulatory subunit 4	Pik3r4
0.707167	0.000564324	3.24847	Q8BHS6	Armadillo repeat-containing X-linked protein 3	Armcx3
0.707141	0.0909508	1.04119	Q62261	Spectrin beta chain, non-erythrocytic 1	Sptbn1
0.705973	0.00119278	2.92344	Q504P2	C-type lectin domain family 12 member A	Clec12a
0.704443	0.0138766	1.85772	Q62230;G3X8X6;Q62230-3;H9KUZ3;Q62230-2;H9KUZ2	Sialoadhesin	Siglec1
0.703581	0.162972	0.787886	P31230;Q3UZG4	Aminoacyl tRNA synthase complex-interacting multifunctional protein 1;Endothelial monocyte-activating polypeptide 2	Aimp1
0.702973	0.213971	0.669645	P62869	Transcription elongation factor B polypeptide 2	Tceb2
0.702415	0.00433172	2.36334	Q9WUN2	Serine/threonine-protein kinase TBK1	Tbk1
0.701346	0.0259109	1.58652	Q8BJU0;Q8BJU0-2	Small glutamine-rich tetratricopeptide repeat-containing protein alpha	Sgta
0.700302	0.00132104	2.87908	O55013	Trafficking protein particle complex subunit 3	Trappc3
0.695807	0.00360008	2.44369	P60766;P60766-1;G3UZM2;D3Z3L1;F2Z463;D3YX61;Q9ER71-2;Q8R527;Q9ER71	Cell division control protein 42 homolog	Cdc42
0.695086	0.00014598	3.83571	B2RXP1;Q8BVU0;E9QAU9;B7ZWM8;E9Q892;F6YZL6;F6Y466;E9Q0H5;F6TPH7	Leucine-rich repeat and calponin homology domain-containing protein 3	Lrch3
0.695082	0.0533185	1.27312	Q05769	Prostaglandin G/H synthase 2	Ptgs2
0.694699	0.00522412	2.28199	P84104-2;P84104;A2A4X6	Serine/arginine-rich splicing factor 3	Srsf3;Gm12355
0.693539	0.00234126	2.63055	Q61462-2;Q61462	Cytochrome b-245 light chain	Cyba
0.692025	0.0603672	1.2192	A2AKM2;A2AKM2-2;F7CPS1	Very-long-chain (3R)-3-hydroxyacyl-[acyl-carrier protein] dehydratase 4	Ptplad2
0.688089	1.94881e-05	4.71023	Q3UJU9;A3KGH5;A3KGH6;A3KGH7	Regulator of microtubule dynamics protein 3	Rmdn3
0.687708	0.00169245	2.77148	Q922D8	C-1-tetrahydrofolate synthase, cytoplasmic;Methylenetetrahydrofolate dehydrogenase;Methenyltetrahydrofolate cyclohydrolase;Formyltetrahydrofolate synthetase	Mthfd1
0.686707	0.0109036	1.96243	Q91YT7;E9PW90;F6Y6H7		Ythdf2
0.684045	0.0311012	1.50722	D3Z125;Q62393-2;E9PUA7;Q62393-3;D3Z7X7;Q62393;F8WHQ1;D3Z637;D3Z2U2	Tumor protein D52	Tpd52
0.683697	0.0510581	1.29194	Q922J3-2;Q922J3;D3Z2Z1;F8WIA1;D3Z3M7;Q8C0S5;F6RCU2;F7CB97;F6RAY2	CAP-Gly domain-containing linker protein 1	Clip1
0.68143	0.0268862	1.57047	P63260;B1ATY1;G3UYG0	Actin, cytoplasmic 2;Actin, cytoplasmic 2, N-terminally processed	Actg1
0.679773	1.34735e-05	4.87052	Q8VEH8;F6Z458;F7AQQ2	Endoplasmic reticulum lectin 1	Erlec1
0.678993	0.000445461	3.35119	P97808;F6TWM7	FXYD domain-containing ion transport regulator 5	Fxyd5
0.677755	0.0225961	1.64597	D3YXL1;Q9CQA9;D3Z2W9;Q8C373	Cancer-related nucleoside-triphosphatase homolog	Ntpcr
0.675264	0.0578684	1.23756	P46471;Q8BVQ9	26S protease regulatory subunit 7	Psmc2
0.674666	0.0218216	1.66111	P25119	Tumor necrosis factor receptor superfamily member 1B	Tnfrsf1b
0.673802	0.0344353	1.463	Q80TY0-4;Q80TY0-2;Q80TY0-3;A2AQ43;A2AQ44;A2AQ42;A2AQ45;A2AQ41;Q80TY0;Q80TY0-5;F6VVN1;A2AQ47;E9Q9P2;A2AQ39;P11260	Formin-binding protein 1	Fnbp1
0.672637	0.0905201	1.04326	Q99M07	Cytochrome c oxidase assembly factor 5	Coa5
0.672628	0.170448	0.768408	P97858;E0CZ89;P97858-2	Solute carrier family 35 member B1	Slc35b1
0.672288	0.00783077	2.1062	O88844;D3YVY3	Isocitrate dehydrogenase [NADP] cytoplasmic	Idh1
0.671425	0.00541394	2.26649	Q8C3J5;Q5SRI3;D6RGU3;Q3TMS1	Dedicator of cytokinesis protein 2	Dock2
0.669562	0.0242828	1.6147	Q99JI4	26S proteasome non-ATPase regulatory subunit 6	Psmd6
0.669016	0.0022905	2.64007	P56394	Cytochrome c oxidase copper chaperone	Cox17
0.666682	0.0103837	1.98365	P62342	Selenoprotein T	Selt
0.666438	0.0873899	1.05854	P16546-2;A3KGU5;P16546;E9Q447;A3KGU7;A3KGU9;A3KGU4;P08032	Spectrin alpha chain, non-erythrocytic 1	Sptan1
0.664464	0.12469	0.904167	F6QL70;P47915;D3Z1N9;F6YH22;F6VZG1	60S ribosomal protein L29	Gm17669;Rpl29;Gm10709;Gm5218
0.663464	0.00177222	2.75148	Q8CAG6;Q9JHK5;Q5F270	Pleckstrin	Plek
0.662338	0.014436	1.84055	B1AT92;Q60631;Q60631-2;B1AT95	Growth factor receptor-bound protein 2	Grb2
0.66151	7.64955e-05	4.11636	P15920;P15920-2	V-type proton ATPase 116 kDa subunit a isoform 2	Atp6v0a2
0.659974	0.118557	0.926071	Q9CZ69	CKLF-like MARVEL transmembrane domain-containing protein 6	Cmtm6
0.658627	0.16746	0.776088	Q792F9;Q00651	Integrin alpha-4	Itga4
0.657271	0.112737	0.947935	Q60805;P55144-3;P55144;P55144-2	Tyrosine-protein kinase Mer	Mertk
0.652838	0.0158455	1.8001	Q9R0P3;H3BKH6;H3BJP2;H3BLJ9;H3BJL6;H3BK43;H3BJC6;H3BL99	S-formylglutathione hydrolase	Esd
0.652057	0.00181179	2.74189	O55135;A6PWZ2;D6RG53;D6RJJ3;B1AZQ4	Eukaryotic translation initiation factor 6	Eif6
0.651871	0.00452852	2.34404	Q9WV68	Peroxisomal 2,4-dienoyl-CoA reductase	Decr2
0.650825	0.375407	0.425498	Q9D938	Transmembrane protein 160	Tmem160
0.64996	0.051625	1.28714	Q9ES74	Serine/threonine-protein kinase Nek7	Nek7
0.647878	0.105431	0.977033	P32921-2;P32921	Tryptophan--tRNA ligase, cytoplasmic;T1-TrpRS;T2-TrpRS	Wars
0.644328	0.0650489	1.18676	P62774	Myotrophin	Mtpn
0.643124	0.00107426	2.96889	Q91YQ1;E9QLQ7;M0QW55	Ras-related protein Rab-7L1	Rab7l1
0.642413	0.000361492	3.4419	Q8JZQ9	Eukaryotic translation initiation factor 3 subunit B	Eif3b
0.642159	0.00177939	2.74973	Q9QYB1	Chloride intracellular channel protein 4	Clic4
0.64141	0.034411	1.4633	Q0KL02-2;Q0KL02-3;Q0KL02;Q0KL02-4	Triple functional domain protein	Trio
0.641398	0.0290708	1.53654	Q9JHJ0	Tropomodulin-3	Tmod3
0.640783	0.0255608	1.59243	O35593	26S proteasome non-ATPase regulatory subunit 14	Psmd14
0.640308	0.00159846	2.7963	Q810B6;Q810B6-2;REV__Q8CIL4	Ankyrin repeat and FYVE domain-containing protein 1	Ankfy1
0.639898	6.17421e-05	4.20942	Q9Z2G6;Q9Z2G6-2;J3QJX3	Protein sel-1 homolog 1	Sel1l
0.639188	0.0402526	1.39521	Q5F2E7;Q5F2E7-2	Nuclear fragile X mental retardation-interacting protein 2	Nufip2
0.636187	0.0216795	1.66395	Q8BZN6-2;Q8BZN6;E9QM99;Q8BZN6-3	Dedicator of cytokinesis protein 10	Dock10
0.635116	0.00777989	2.10903	Q78XF5	Oligosaccharyltransferase complex subunit OSTC	Ostc
0.634277	0.0009039	3.04388	Q921L3	Transmembrane and coiled-coil domain-containing protein 1	Tmco1
0.631832	0.000896192	3.0476	Q9D662;A2ANA0;A2AN98;A2AN99;A2AN97	Protein transport protein Sec23B	Sec23b
0.631008	0.039252	1.40614	F8VQC1;E9Q740	Signal recognition particle subunit SRP72	Srp72
0.62997	0.115212	0.938502	Q9QWK4	CD5 antigen-like	Cd5l
0.629948	0.00703512	2.15273	Q8BGJ5;Q922I7;Q8CB58;P17225;E9QMW9;E9Q0W3;F7DCW4;F7AXP1	Polypyrimidine tract-binding protein 1	Ptbp1
0.629277	0.0129621	1.88732	O35685	Nuclear migration protein nudC	Nudc
0.627866	0.000227295	3.64341	Q9CWJ9	Bifunctional purine biosynthesis protein PURH;Phosphoribosylaminoimidazolecarboxamide formyltransferase;IMP cyclohydrolase	Atic
0.627623	0.131559	0.880879	E9Q467;E9Q236		Abcc4
0.624404	0.0157022	1.80404	Q9CQL4	39S ribosomal protein L20, mitochondrial	Mrpl20
0.623476	0.0892284	1.0495	A2ASZ8-2;A2ASZ8-3;A2ASZ8;A2ASZ8-4;A2ASZ8-5;F6RC04	Calcium-binding mitochondrial carrier protein SCaMC-2	Slc25a25
0.621673	0.0227241	1.64351	Q8BHL5-2;Q8BHL5;Q8BHL5-3;F6YXR3;Q5GMG0;F6XD63	Engulfment and cell motility protein 2	Elmo2
0.621394	0.000638526	3.19482	Q9CQA1	Trafficking protein particle complex subunit 5	Trappc5
0.621321	0.00380538	2.4196	Q58NB6	Dehydrogenase/reductase SDR family member 9	Dhrs9
0.620793	9.27518e-06	5.03268	Q9EPE9	Probable cation-transporting ATPase 13A1	Atp13a1
0.620206	0.244895	0.61102	Q9CX56	26S proteasome non-ATPase regulatory subunit 8	Psmd8
0.618992	0.161336	0.79227	E9QKV6;E9PWZ6;E9PZW8		Myo9b
0.618817	0.0906476	1.04264	O55142	60S ribosomal protein L35a	Rpl35a
0.618376	0.0161754	1.79115	P62264;D3YVF4;D3Z7I1	40S ribosomal protein S14	Rps14
0.618212	0.00128803	2.89008	Q5D0E0;O88351;F6ULQ4	Inhibitor of nuclear factor kappa-B kinase subunit beta	Ikbkb
0.618131	0.0113726	1.94414	Q80WQ2	Protein VAC14 homolog	Vac14
0.618081	0.00423315	2.37334	Q99MK8;Q7TS64;F6QY34;F7AEX1;E9PW16;E9Q419	Beta-adrenergic receptor kinase 1	Adrbk1
0.617043	0.136323	0.865431	Q922F4	Tubulin beta-6 chain	Tubb6
0.615993	0.0101823	1.99215	O55222;F6Q5Z1;D3YZA5	Integrin-linked protein kinase	Ilk
0.615989	0.0107588	1.96824	P62137	Serine/threonine-protein phosphatase PP1-alpha catalytic subunit	Ppp1ca
0.614195	0.167937	0.774852	Q8BMT4-2;Q8BMT4;Q8BMT4-3;D3Z755	Leucine-rich repeat-containing protein 33	Lrrc33
0.614076	0.020646	1.68516	Q6IRU2	Tropomyosin alpha-4 chain	Tpm4
0.613845	0.00647159	2.18899	O35375-2;O35375-3;O35375-4;O35375	Neuropilin-2	Nrp2
0.612922	0.152112	0.817837	Q80UP3;A2AHJ7;A2AHK0;D3Z519;D3Z2W1;D3YWQ0	Diacylglycerol kinase zeta	Dgkz
0.6095	6.4526e-05	4.19027	Q6ZWX6	Eukaryotic translation initiation factor 2 subunit 1	Eif2s1
0.607058	0.00137996	2.86013	O88487;Q3TPJ8;A2BFF8;A2BFF9;A2BFF5	Cytoplasmic dynein 1 intermediate chain 2	Dync1i2
0.600812	0.0554075	1.25643	Q9CZ30;Q9CZ30-2;B1AYJ9	Obg-like ATPase 1	Ola1
0.600739	0.0122206	1.91291	Q9CR50;G3UWD8	RING finger and CHY zinc finger domain-containing protein 1	Rchy1
0.600193	0.00921295	2.0356	P27601;Q9D034	Guanine nucleotide-binding protein subunit alpha-13	Gna13
0.598871	0.0456306	1.34074	Q61112;Q61112-2	45 kDa calcium-binding protein	Sdf4
0.59781	0.00176998	2.75203	Q9CY58;Q9CY58-2;Q9CY58-3;Q9CY58-4	Plasminogen activator inhibitor 1 RNA-binding protein	Serbp1
0.595329	0.00158938	2.79877	D3Z3R1;Q6ZWZ4;D3YW41;P47964;D3YX71	60S ribosomal protein L36	Gm5745;Rpl36;Rpl36-ps3
0.594467	0.0226536	1.64486	Q91YS8;D3Z368;Q8BW96-2;Q8BW96-3;Q8BW96	Calcium/calmodulin-dependent protein kinase type 1	Camk1
0.592725	0.000966473	3.01481	P24668	Cation-dependent mannose-6-phosphate receptor	M6pr
0.591073	0.0167045	1.77717	P62267	40S ribosomal protein S23	Rps23
0.59034	0.0523847	1.2808	Q00519	Xanthine dehydrogenase/oxidase;Xanthine dehydrogenase;Xanthine oxidase	Xdh
0.590264	0.0309273	1.50966	Q91VI7	Ribonuclease inhibitor	Rnh1
0.588671	0.0229502	1.63921	Q9D2V7	Coronin-7	Coro7
0.586932	0.00391221	2.40758	Q6PHN9;Q923S9	Ras-related protein Rab-35	Rab35
0.583158	0.00267959	2.57193	Q99L43;A2AMQ5;Q6PBC0;F6S4G2;P98191	Phosphatidate cytidylyltransferase 2	Cds2
0.58201	0.0112858	1.94747	Q8BPU7;Q8BPU7-2;Q8BPU7-3;Q8BPU7-4	Engulfment and cell motility protein 1	Elmo1
0.579132	0.086705	1.06196	Q9JK48;Q9JK48-2	Endophilin-B1	Sh3glb1
0.577237	0.00171077	2.76681	Q6DVA0	LEM domain-containing protein 2	Lemd2
0.576151	1.98691e-05	4.70182	P62889	60S ribosomal protein L30	Rpl30
0.575554	0.023197	1.63457	P06795	Multidrug resistance protein 1B	Abcb1b
0.575464	5.36571e-05	4.27037	D3YWD5;Q9D2V8;D3YYM9;D6RI23	Major facilitator superfamily domain-containing protein 10	Mfsd10
0.574241	0.0523127	1.28139	Q04447;P07310	Creatine kinase B-type	Ckb
0.573627	0.020265	1.69325	O70145	Neutrophil cytosol factor 2	Ncf2
0.573027	0.0239817	1.62012	P61021	Ras-related protein Rab-5B	Rab5b
0.571717	0.00225033	2.64775	Q8VDV3;Q8VDV3-2;D3Z585;D3YZN2;D3YXL8;D3YZ86	Guanine nucleotide exchange factor for Rab-3A	Rab3il1
0.570571	0.00359837	2.44389	Q9CQJ6;E9Q0G1	Density-regulated protein	Denr
0.569072	0.00146309	2.83473	P58137;Q8BZR4;G3UXJ8	Acyl-coenzyme A thioesterase 8	Acot8
0.568009	0.438393	0.358136	Q80UI7		Clec4a1
0.567966	0.00410133	2.38707	P62754	40S ribosomal protein S6	Rps6
0.567712	0.000157132	3.80373	P97287;P97287-2	Induced myeloid leukemia cell differentiation protein Mcl-1 homolog	Mcl1
0.567679	0.463743	0.333722	O88792	Junctional adhesion molecule A	F11r
0.565745	0.0129745	1.88691	Q8R3I9	UDP-GlcNAc:betaGal beta-1,3-N-acetylglucosaminyltransferase 8	B3gnt8
0.565443	0.00448754	2.34799	Q9Z0N1;Q9Z0N2;A2AAW9	Eukaryotic translation initiation factor 2 subunit 3, X-linked;Eukaryotic translation initiation factor 2 subunit 3, Y-linked	Eif2s3x;Eif2s3y
0.565278	0.0119265	1.92349	Q8VDP6	CDP-diacylglycerol--inositol 3-phosphatidyltransferase	Cdipt
0.564303	0.000345939	3.461	Q8K1R3;Q8K1R3-2	Polyribonucleotide nucleotidyltransferase 1, mitochondrial	Pnpt1
0.564219	0.012857	1.89086	Q91W53;Q91W53-2	Golgin subfamily A member 7	Golga7
0.564183	0.00145651	2.83669	Q9D7N9	Adipocyte plasma membrane-associated protein	Apmap
0.56333	0.0510834	1.29172	P63158;D3YZ18;D3YVC6	High mobility group protein B1	Hmgb1
0.562648	0.00329242	2.48248	Q8CBY8;Q8CBY8-2	Dynactin subunit 4	Dctn4
0.562477	0.0117341	1.93055	Q9JL26;A2AB60;Q9JL26-2;G3UWI1	Formin-like protein 1	Fmnl1
0.562133	0.0164256	1.78448	P35980;G3UZJ6;G3UZK4;G3UYV6;G3UX28	60S ribosomal protein L18	Rpl18
0.562076	0.393109	0.405487	O78196;P04230;P04231;P20040;P18468;P18469;P01915	H-2 class II histocompatibility antigen, E-B beta chain;H-2 class II histocompatibility antigen, E-S beta chain;H-2 class II histocompatibility antigen, E-Q beta chain;H-2 class II histocompatibility antigen, I-A beta chain	H2-Eb1
0.561464	0.106483	0.972721	O88958;D3Z0R5;G3UXF5;D3YWR1;Q9CRC9-2;Q9CRC9	Glucosamine-6-phosphate isomerase 1	Gnpda1
0.561319	0.147691	0.830647	F8WGT1;Q68FL4;E9PV16;Q68FL4-2;F8WI65;H3BKT5;D3YX97;H3BL31;D3YYM7;E9PX77;F7ATQ6;D3Z2Q0	Adenosylhomocysteinase;Putative adenosylhomocysteinase 3	Ahcyl2
0.561026	0.12833	0.89167	O70310;Q8CFK1;A2AJH3;O70311	Glycylpeptide N-tetradecanoyltransferase 1	Nmt1
0.559452	0.00900774	2.04538	Q9Z1Q9;G3UY93;G3UZ22;G3UYW2	Valine--tRNA ligase	Vars
0.559286	0.0700851	1.15437	Q02105	Complement C1q subcomponent subunit C	C1qc
0.558869	0.0856725	1.06716	Q3UQ44	Ras GTPase-activating-like protein IQGAP2	Iqgap2
0.55622	0.231354	0.635722	Q61937;Q9DAY9;E9Q5T3;Q5SQB5;Q5SQB0	Nucleophosmin	Npm1;Gm5611
0.55232	0.103027	0.98705	Q9JHF7	Hematopoietic prostaglandin D synthase	Hpgds
0.55135	0.000740778	3.13031	Q99KC8;F6TIL5;D3Z671;D3Z518;Q8BGF0	von Willebrand factor A domain-containing protein 5A	Vwa5a
0.549872	0.0173271	1.76127	Q91W52;Q91W52-2	Transmembrane protein 19	Tmem19
0.549497	0.00145138	2.83822	Q8BH79-2;Q8BH79;Q8BH79-4;Q8BH79-3	Anoctamin-10	Ano10
0.548317	0.0879838	1.0556	E0CZE8;E0CXR0;E0CX98;Q9D2C7	Bax inhibitor 1	Tmbim6
0.54711	0.00052367	3.28094	Q9DBJ1;O70250	Phosphoglycerate mutase 1	Pgam1
0.54709	0.031009	1.50851	Q8C7U7	Polypeptide N-acetylgalactosaminyltransferase 6	Galnt6
0.546166	0.132868	0.87658	O70133-2;E9QNN1;O70133;O70133-3	ATP-dependent RNA helicase A	Dhx9
0.545673	0.167347	0.776381	E9PUE7;Q5SSL4;Q5SSL4-2;Q5SSL4-4;Q5SSL4-3;H3BJY3;H3BL84;H3BKT3;H3BKV6;Q6PAJ1	Active breakpoint cluster region-related protein	Abr
0.544028	0.00103061	2.98691	P26645	Myristoylated alanine-rich C-kinase substrate	Marcks
0.543456	3.5809e-06	5.44601	Q3KNM2;F6W8T3	E3 ubiquitin-protein ligase MARCH5	38412
0.54017	0.0108049	1.96638	Q61093;E9Q7S3;E9Q802	Cytochrome b-245 heavy chain	Cybb
0.539229	0.158051	0.801203	Q3UV16	Inositol 1,4,5-trisphosphate receptor-interacting protein-like 2	Itpripl2
0.538837	0.0121693	1.91474	Q8VCF1;Q8VCF1-3;Q8VCF1-2	Soluble calcium-activated nucleotidase 1	Cant1
0.535981	0.510468	0.292032	P04441-2
0.53225	0.00969078	2.01364	P62320	Small nuclear ribonucleoprotein Sm D3	Snrpd3
0.531789	0.10943	0.960863	O70579	Peroxisomal membrane protein PMP34	Slc25a17
0.53177	0.169187	0.771634	Q64277;D3Z579	ADP-ribosyl cyclase 2	Bst1
0.531657	2.32387e-05	4.63379	P05064;A6ZI44;Q9CPQ9;A6ZI46;D3YWI1;D3YV98;D3Z510;A6ZI47	Fructose-bisphosphate aldolase A;Fructose-bisphosphate aldolase	Aldoa;Aldoart1
0.531558	0.00648524	2.18807	Q62167;P16381;Q61496;Q3V086	ATP-dependent RNA helicase DDX3X;Putative ATP-dependent RNA helicase Pl10	Ddx3x;D1Pas1
0.529918	0.0744061	1.12839	Q61072;E9Q638	Disintegrin and metalloproteinase domain-containing protein 9	Adam9
0.528702	0.0238142	1.62316	B2RXS4	Plexin-B2	Plxnb2
0.528576	0.0945697	1.02425	D3YTQ9;P62843;F7ANJ3	40S ribosomal protein S15	Rps15
0.527952	0.0115634	1.93692	Q8BHC7	Rhomboid-related protein 4	Rhbdd1
0.525395	0.00709769	2.14888	P30355	Arachidonate 5-lipoxygenase-activating protein	Alox5ap
0.522453	0.0566017	1.24717	Q9Z222;G3UWI7	UDP-GlcNAc:betaGal beta-1,3-N-acetylglucosaminyltransferase 2	B3gnt2
0.521777	0.00333717	2.47662	P97820;F8VPL5;E9PVG7;Q62083;E9PUZ5;E9QAC6	Mitogen-activated protein kinase kinase kinase kinase 4	Map4k4
0.521162	0.00133854	2.87337	Q6ZWU9	40S ribosomal protein S27	Rps27
0.520559	0.000869494	3.06073	Q9CXE7;E9PXY3;D3Z615;Q8C5H9;Q3V440;E9Q2J2	Transmembrane emp24 domain-containing protein 5	Tmed5
0.520471	0.0633848	1.19802	Q99KP6;Q99KP6-2;J3QNL8;Q99KP6-3	Pre-mRNA-processing factor 19	Prpf19
0.520434	0.0762953	1.1175	Q8BG84-5;Q8BG84-4;Q8BG84-2;Q8BG84-6;Q8BG84;Q8BG84-3;G8JL64	Leukocyte-associated immunoglobulin-like receptor 1	Lair1
0.520393	0.0452572	1.34431	Q9D7X3;B1AQF4;Q3V2Y9;H3BKD1;H3BKL8	Dual specificity protein phosphatase 3	Dusp3
0.51995	0.00528318	2.2771	Q99LR1;D6RFU2;D6RI21;F7BHM8	Monoacylglycerol lipase ABHD12	Abhd12
0.519633	0.0298785	1.52464	Q64152-2;Q64152	Transcription factor BTF3	Btf3
0.518963	0.0212693	1.67225	P51410;G3UW34;D3Z629;D3YZT0	60S ribosomal protein L9	Rpl9;Rpl9-ps6
0.518662	0.0382506	1.41736	Q8VDS8-3;Q8VDS8;D3YY98;Q8VDS8-2	Syntaxin-18	Stx18
0.517248	0.022896	1.64024	Q9ERN0	Secretory carrier-associated membrane protein 2	Scamp2
0.516528	0.00541279	2.26658	P35293	Ras-related protein Rab-18	Rab18
0.516378	0.0431812	1.36471	D3Z7C6;Q9R0Q7	Prostaglandin E synthase 3	Ptges3
0.515715	0.00462202	2.33517	Q9Z210;D6RFQ2;D3Z0M4;E9PXK7;D6RFR1	Peroxisomal membrane protein 11B	Pex11b
0.515285	0.0292381	1.53405	P09405	Nucleolin	Ncl
0.515136	0.0507159	1.29486	P12023;P12023-3;P12023-2	Amyloid beta A4 protein;N-APP;Soluble APP-alpha;Soluble APP-beta;C99;Beta-amyloid protein 42;Beta-amyloid protein 40;C83;P3(42);P3(40);C80;Gamma-secretase C-terminal fragment 59;Gamma-secretase C-terminal fragment 57;Gamma-secretase C-terminal fragment 50;C31	App
0.51477	0.108418	0.964897	Q60817;P70670	Nascent polypeptide-associated complex subunit alpha;Nascent polypeptide-associated complex subunit alpha, muscle-specific form	Naca
0.513286	0.0373913	1.42723	A2AQD6;Q922B9;Q922B9-3;A2AQD5;Q922B9-2	Sperm-specific antigen 2 homolog	Ssfa2
0.511541	0.0332382	1.47836	Q8R5A3;F2Z3U3;F2Z4B7;G5E867;F2Z408	Amyloid beta A4 precursor protein-binding family B member 1-interacting protein	Apbb1ip
0.511314	0.000413731	3.38328	Q9DBP5	UMP-CMP kinase	Cmpk1
0.510709	0.01493	1.82594	Q8R502;D3YUV5	Leucine-rich repeat-containing protein 8C	Lrrc8c
0.507476	0.0660121	1.18038	Q99JX4;A2A702;A2A701	Eukaryotic translation initiation factor 3 subunit M	Eif3m
0.50704	0.14445	0.840283	Q6P5B5;Q9WVR4	Fragile X mental retardation syndrome-related protein 2	Fxr2
0.503803	0.15354	0.813777	Q99LH2	Phosphatidylserine synthase 1	Ptdss1
0.502674	0.206542	0.684991	Q3UPL0-2;Q3UPL0;Q3UPL0-3	Protein transport protein Sec31A	Sec31a
0.501876	0.0162341	1.78957	Q8R105;Q8R105-2	Vacuolar protein sorting-associated protein 37C	Vps37c
0.50178	0.0117669	1.92934	Q5RKN9;P47753	F-actin-capping protein subunit alpha-1	Capza1
0.499732	0.0015023	2.82324	P61514	60S ribosomal protein L37a	Rpl37a
0.499505	0.0674009	1.17133	P30681	High mobility group protein B2	Hmgb2
0.498175	0.233329	0.632031	P08101;P08101-2;P08101-3;E9Q415	Low affinity immunoglobulin gamma Fc region receptor II	Fcgr2;Fcgr2b
0.497601	0.0247414	1.60658	Q9D7S7-2;Q9D7S7	60S ribosomal protein L22-like 1	Rpl22l1
0.497465	0.0127045	1.89604	P83940	Transcription elongation factor B polypeptide 1	Tceb1
0.497296	0.0456264	1.34078	Q3TJ55;Q80W45;Q00262;D3YY94	Syntaxin-2	Stx2
0.497173	0.00271661	2.56597	Q9JI11;A2A5M9;Q8CDG4;F7BYZ4;Q9JI10-2	Serine/threonine-protein kinase 4;Serine/threonine-protein kinase 4 37kDa subunit;Serine/threonine-protein kinase 4 18kDa subunit	Stk4
0.496127	0.123227	0.909293	P06800-3;P06800-2;P06800	Receptor-type tyrosine-protein phosphatase C	Ptprc
0.495954	0.0466555	1.3311	P40142	Transketolase	Tkt
0.495603	0.0180364	1.74385	Q9JII6;B1AXW3	Alcohol dehydrogenase [NADP(+)]	Akr1a1
0.495512	0.0106372	1.97317	Q6A099;Q6DFZ1;H3BLN1;H3BIX5;H3BLM8		Gbf1
0.495089	0.00105805	2.9755	Q61190;Q8VHM7;F6XX07;E9Q083	Interleukin-10 receptor subunit beta	Il10rb
0.493952	0.00307811	2.51172	Q91XV3	Brain acid soluble protein 1	Basp1
0.491832	0.0539891	1.26769	Q6DFW0;Q3U3D8;A2ANZ2	Protein C9orf72 homolog	3110043O21Rik
0.491287	0.227415	0.643181	Q9CQ65	S-methyl-5-thioadenosine phosphorylase	Mtap
0.490498	0.00832393	2.07967	Q9CQM8;O09167;D3YX47;D3Z4H7	60S ribosomal protein L21	Rpl21;Rpl21-ps6
0.490278	0.0185493	1.73167	P28867;P28867-2;Q1MX41;Q1MX43;Q1MX40;Q1MX42;B1AYX8;Q8CAV6;REV__E9Q9T6;REV__Q6ZPL9;Q02111	Protein kinase C delta type;Protein kinase C delta type regulatory subunit;Protein kinase C delta type catalytic subunit	Prkcd
0.489611	0.00694093	2.15858	P63005;P63005-2;Q5SW16	Platelet-activating factor acetylhydrolase IB subunit alpha	Pafah1b1
0.489299	0.00403507	2.39415	Q9JME7	Trafficking protein particle complex subunit 2-like protein	Trappc2l
0.488851	0.00126199	2.89894	O54734	Dolichyl-diphosphooligosaccharide--protein glycosyltransferase 48 kDa subunit	Ddost
0.488298	0.0825474	1.0833	Q3KQM4;P26369	Splicing factor U2AF 65 kDa subunit	U2af2
0.487045	0.00904432	2.04362	P61028	Ras-related protein Rab-8B	Rab8b
0.486848	0.379798	0.420447	Q99PV0;B7ZC27	Pre-mRNA-processing-splicing factor 8	Prpf8
0.48679	0.18254	0.738643	E9Q634	Unconventional myosin-Ie	Myo1e
0.48669	0.209003	0.679847	A2AUK8;A2AUK7;Q9Z2H5-3;Q9Z2H5-2;A2AUK5;Q9Z2H5;A2AUK6;E9PV14	Band 4.1-like protein 1	Epb4.1l1;Epb41l1
0.486479	0.207572	0.68283	Q3TWW8;Q8VE97;Q542V3;A2A837		Srsf6
0.48571	0.102778	0.988101	Q63844;D3Z6D8;D3Z3G6	Mitogen-activated protein kinase 3	Mapk3
0.484443	0.12473	0.90403	P41251	Natural resistance-associated macrophage protein 1	Slc11a1
0.484308	0.0104927	1.97911	P81117	Nucleobindin-2;Nesfatin-1	Nucb2
0.482417	0.00262562	2.58077	M0QWR5;Q6QLQ4	C-type lectin domain family 7 member A	Clec7a
0.481787	0.0673793	1.17147	E9Q9N6;E9PYX3;Q05512-3;Q05512-4;Q05512;F6ZS70;E9QMP6;Q3T9A3;Q05512-2;F7CVZ7;F6UY70;E9Q2J6;F7A3Q3;F6ZEX4;E9Q2G8;E9Q8H5;F7CRG8;Q8VHJ5;E9PZ55;Q8CIP4	Serine/threonine-protein kinase MARK2	Mark2
0.480756	0.0626752	1.2029	Q6P8X1	Sorting nexin-6	Snx6
0.480561	0.00174148	2.75908	Q61542	StAR-related lipid transfer protein 3	Stard3
0.479458	0.0137786	1.8608	P62301	40S ribosomal protein S13	Rps13
0.479344	0.00112775	2.94779	Q9BCZ4	Selenoprotein S	Vimp
0.478808	0.0743353	1.1288	Q64337-2;Q64337;D3YZJ1;F6VD69	Sequestosome-1	Sqstm1
0.478432	0.549403	0.260109	Q8BH26	Transmembrane protein 251	Tmem251
0.477636	0.0017188	2.76477	P62281	40S ribosomal protein S11	Rps11
0.474778	0.000440859	3.3557	Q8K2C7;Q8K2C7-2	Protein OS-9	Os9
0.47468	0.038238	1.4175	P80317;E9QPA6;Q61390;B1AT05	T-complex protein 1 subunit zeta	Cct6a
0.474339	0.228775	0.640592	Q3U9N9	Monocarboxylate transporter 10	Slc16a10
0.474089	0.0151698	1.81902	Q5XJF6;P53026;D3YXT2;D6RE43	Ribosomal protein;60S ribosomal protein L10a	Rpl10a
0.473003	0.0501189	1.3	Q9JIY0;F6XQM2;D3YVD1;F6VV25	Pleckstrin homology domain-containing family O member 1	Plekho1
0.471998	0.000135203	3.86902	Q9EPL9;Q8C178;E9Q296;D3Z2N6;REV__Q5SV54;REV__Q5SV55;REV__Q9CSB4-2;REV__Q9CSB4	Peroxisomal acyl-coenzyme A oxidase 3;Acyl-coenzyme A oxidase	Acox3
0.471806	0.386008	0.413404	Q7M739;F6ZDS4;F6RX08	Nucleoprotein TPR	Tpr
0.470551	0.00909006	2.04143	P20934	Protein EVI2A	Evi2a
0.468858	0.0042671	2.36987	P63242;J3QPS8;Q8BGY2	Eukaryotic translation initiation factor 5A-1	Eif5a
0.468738	0.185021	0.732778	A2BGN7;Q9D8X0	Protein MANBAL	Manbal
0.468569	0.00327285	2.48507	Q2TPA8;B1AX78;B1AX77	Hydroxysteroid dehydrogenase-like protein 2	Hsdl2
0.467378	0.0359226	1.44463	Q91VC9	Growth hormone-inducible transmembrane protein	Ghitm
0.46633	0.0057259	2.24216	Q8C522	Endonuclease domain-containing 1 protein	Endod1
0.466199	0.0626409	1.20314	Q8C147;Q8C147-2	Dedicator of cytokinesis protein 8	Dock8
0.466194	0.0517818	1.28582	P70227	Inositol 1,4,5-trisphosphate receptor type 3	Itpr3
0.465524	0.0196427	1.7068	P11688	Integrin alpha-5;Integrin alpha-5 heavy chain;Integrin alpha-5 light chain	Itga5
0.464806	0.240562	0.618773	A2AUM6;P16254	Signal recognition particle 14 kDa protein;Signal recognition particle 14 kDa protein, N-terminally processed	Srp14
0.464443	0.222383	0.652899	Q80WQ6	Inactive rhomboid protein 2	Rhbdf2
0.464412	0.209513	0.678789	O09061	Proteasome subunit beta type-1	Psmb1
0.464241	0.0597868	1.2234	Q07797;E9Q5X5	Galectin-3-binding protein	Lgals3bp
0.463727	0.010674	1.97167	E9Q132;Q8BP67;F6RSK3	60S ribosomal protein L24	Rpl24
0.463702	0.0539417	1.26807	F7CBP1;G3XA17;Q62448-2;Q62448;F6TW20;F7DAB1	Eukaryotic translation initiation factor 4 gamma 2	Eif4g2
0.463677	0.133586	0.87424	P54775	26S protease regulatory subunit 6B	Psmc4
0.462511	0.217845	0.661853	Q80SZ7;J3QPM9	Guanine nucleotide-binding protein G(I)/G(S)/G(O) subunit gamma-5	Gng5
0.462314	0.0046702	2.33066	P55258;Q8K386;Q3TYH2;Q9CZT8;A2A7Z6	Ras-related protein Rab-8A	Rab8a
0.461477	0.408551	0.388753	O09047	C3a anaphylatoxin chemotactic receptor	C3ar1
0.460471	0.0676159	1.16995	Q9CXW3	Calcyclin-binding protein	Cacybp
0.460029	0.00200917	2.69698	P51660	Peroxisomal multifunctional enzyme type 2;(3R)-hydroxyacyl-CoA dehydrogenase;Enoyl-CoA hydratase 2	Hsd17b4
0.459861	0.0139771	1.85458	Q8BH02	Torsin-4A	Tor4a
0.459287	0.0329351	1.48234	D3Z079;Q8K400;D3Z2Q2;Q8K400-2;F6WXQ4	Syntaxin-binding protein 5	Stxbp5
0.459143	0.308557	0.510665	Q99L45;E0CXJ3	Eukaryotic translation initiation factor 2 subunit 2	Eif2s2
0.458804	0.0752122	1.12371	Q4LDD4-3;Q4LDD4-2;Q4LDD4;E9PUB0;F6XBJ8;D3YWW7	Arf-GAP with Rho-GAP domain, ANK repeat and PH domain-containing protein 1	Arap1
0.458123	0.0431956	1.36456	Q8BHE8	Uncharacterized protein C2orf47 homolog, mitochondrial
0.4579	0.0587138	1.23126	Q9QXB9	Developmentally-regulated GTP-binding protein 2	Drg2
0.45714	0.00507188	2.29483	G3X9F1;Q9R1S3-2;Q9R1S3-3;Q9R1S3;Q9R1S3-4	GPI ethanolamine phosphate transferase 1	Pign
0.456936	0.118734	0.925425	P29351;P29351-2;P29351-3;G3UYY5;G3UZU6;G3UXM2	Tyrosine-protein phosphatase non-receptor type 6	Ptpn6
0.456303	0.317443	0.498334	Q99KW3-4;Q99KW3;Q99KW3-1;E9QMQ3;Q99KW3-2;G5E8W1;J9JI90;Q99KW3-5	TRIO and F-actin-binding protein	Triobp
0.455463	0.00299276	2.52393	F8WJK8;Q99L47;E9Q1V0	Hsc70-interacting protein	St13
0.454732	0.273794	0.562577	Q5SUC9;Q5SUD5	Protein SCO1 homolog, mitochondrial	Sco1
0.45394	0.04813	1.31758	Q9Z2U1;D3YX79	Proteasome subunit alpha type-5;Proteasome subunit alpha type	Psma5;Gm8394
0.453246	0.00272228	2.56507	Q91X78;E9PUH5;E9PZB0	Erlin-1	Erlin1
0.453197	0.0130197	1.8854	Q99PT1	Rho GDP-dissociation inhibitor 1	Arhgdia
0.452588	0.133063	0.875943	A2AE89;P10649;F6WHQ7;F6Y363;D3YZ29;D3YVP6;D3YX76;A2AE91;E9QAC8;D3YVP5;Q8R5I6;Q80W21;P15626;E9PV63;J3QQ61;E9PVM7;O35660;P48774	Glutathione S-transferase Mu 1	Gstm1
0.451269	0.160582	0.794303	A2AWF8;Q64455;A2AWF9;E9Q4S7	Receptor-type tyrosine-protein phosphatase eta	Ptprj
0.450918	0.0345699	1.4613	Q9D8C2;A7NSI0	Tetraspanin-13	Tspan13
0.450393	0.000162853	3.7882	P47754;D6RCW7	F-actin-capping protein subunit alpha-2	Capza2
0.449773	0.0231802	1.63488	Q80ZX0;F6VJC5;F6YIN5		Sec24b
0.448234	0.0185268	1.7322	Q6ZWY3;D6RH49;D3YYB0	40S ribosomal protein S27-like;40S ribosomal protein S27	Rps27l
0.447522	0.0810433	1.09128	P97370	Sodium/potassium-transporting ATPase subunit beta-3	Atp1b3
0.447459	0.00640984	2.19315	P97363	Serine palmitoyltransferase 2	Sptlc2
0.447335	0.0808734	1.09219	Q6GV12	3-ketodihydrosphingosine reductase	Kdsr
0.446765	0.0629562	1.20096	Q9CR60	Vesicle transport protein GOT1B	Golt1b
0.445896	0.150914	0.821271	P60605;G3UZX2	Ubiquitin-conjugating enzyme E2 G2	Ube2g2
0.445659	0.138493	0.858573	Q9EPR4;Q9EPR4-2;A2ANL1	Solute carrier family 23 member 2	Slc23a2
0.445317	0.157953	0.801472	Q3U2C5;Q3U2C5-2	E3 ubiquitin-protein ligase RNF149	Rnf149
0.44513	0.136775	0.863994	Q64430;A2AG68;B1AQ57;Q64446	Copper-transporting ATPase 1	Atp7a
0.444122	0.0457733	1.33939	Q9QUK3;D3Z2H1;D3Z332;D3Z3T9	Protein CLN8	Cln8
0.442388	0.0207529	1.68292	P61358;E9PV49;A2A4Q0	60S ribosomal protein L27	Rpl27;Gm4825
0.441289	0.0933883	1.02971	O35682	Myeloid-associated differentiation marker	Myadm
0.439684	0.0296378	1.52815	O88856;Q3TQN1	Protein-tyrosine sulfotransferase 2	Tpst2
0.439362	0.0183264	1.73692	Q9DCH4	Eukaryotic translation initiation factor 3 subunit F	Eif3f
0.439155	0.053126	1.27469	Q9WVA3	Mitotic checkpoint protein BUB3	Bub3
0.438929	0.000135688	3.86746	P09411;P09041	Phosphoglycerate kinase 1	Pgk1
0.438468	0.00357144	2.44716	Q8K273	Membrane magnesium transporter 1	Mmgt1
0.438103	0.00683202	2.16545	P70245;A2AC29	3-beta-hydroxysteroid-Delta(8),Delta(7)-isomerase	Ebp
0.437844	0.0265011	1.57674	Q09014;F8WH69	Neutrophil cytosol factor 1	Ncf1
0.437443	0.0174943	1.7571	Q8R1Z9;K4DI70;Q8R1Z9-2;Q8R1Z9-3;F6XTP0	RING finger protein 121	Rnf121
0.43744	0.00213937	2.66971	Q9QUI0;H3BL56;Q9CR99	Transforming protein RhoA	Rhoa;Rhoc
0.437252	0.0199002	1.70114	Q9JHU4;F6ZX84	Cytoplasmic dynein 1 heavy chain 1	Dync1h1
0.437185	0.0720624	1.14229	P62855	40S ribosomal protein S26	Rps26
0.436902	0.0492307	1.30776	Q91VC3;E9PV04;A2AFK7;D6RJ60;D6RJ11	Eukaryotic initiation factor 4A-III	Eif4a3;Gm8994
0.435573	0.279009	0.554382	Q3UGP8	Putative Dol-P-Glc:Glc(2)Man(9)GlcNAc(2)-PP-Dol alpha-1,2-glucosyltransferase	Alg10b
0.435283	0.0164782	1.78309	A2AR26;Q3UDF0;A2AR27		Slc2a6
0.433619	0.196429	0.706795	F8VQC9;Q8BTY2;Q8BTY2-2;Q8JZR6-2;Q5DTL9-2;Q8JZR6;B1AWV9;Q5DTL9	Sodium bicarbonate cotransporter 3	Slc4a7
0.433577	0.093511	1.02914	Q7TT50;Q80UW5	Serine/threonine-protein kinase MRCK beta	Cdc42bpb
0.433478	0.223636	0.650459	Q9QZL0;G3X8V8;E9PZP3	Receptor-interacting serine/threonine-protein kinase 3	Ripk3
0.433151	0.0551754	1.25825	Q6P6I8;E0CYM8;P97797-2;P97797;E9QPT7;E0CX65;P97797-3;A2ANC1	Tyrosine-protein phosphatase non-receptor type substrate 1	Sirpa
0.431587	0.0496841	1.30378	Q9QZ06;A9JEI5;Q8C5G6;F7AT44	Toll-interacting protein	Tollip
0.431277	0.0112584	1.94853	P62830;A2A6F8	60S ribosomal protein L23	Rpl23
0.431209	0.17055	0.768149	Q9CYG7;Q9CYG7-2	Mitochondrial import receptor subunit TOM34	Tomm34
0.430847	0.0079004	2.10235	Q8BLI4	Dermatan-sulfate epimerase	Dse
0.430474	0.161905	0.790739	Q3UQN2;F6RG68;Q3UQN2-3;J3QPQ1;Q3UQN2-2	FCH domain only protein 2	Fcho2
0.430219	0.19252	0.715523	Q9CQ69;I7HPX6	Cytochrome b-c1 complex subunit 8	Uqcrq
0.430201	0.226418	0.645088	O08529	Calpain-2 catalytic subunit	Capn2
0.429371	0.0248423	1.60481	Q3UJ81;D3Z6J3;Q3UJ81-3;Q3UJ81-2	Nuclear envelope phosphatase-regulatory subunit 1	Cnep1r1
0.429319	0.00163043	2.7877	Q99KV1	DnaJ homolog subfamily B member 11	Dnajb11
0.428968	0.399409	0.398582	Q6PFD9	Nuclear pore complex protein Nup98-Nup96;Nuclear pore complex protein Nup98;Nuclear pore complex protein Nup96	Nup98
0.428833	0.0126056	1.89944	P62849-2;P62849-3;P62849	40S ribosomal protein S24	Rps24
0.428557	0.016277	1.78843	P16879	Tyrosine-protein kinase Fes/Fps	Fes
0.427338	0.111032	0.954551	P80313	T-complex protein 1 subunit eta	Cct7
0.426796	0.00171673	2.7653	Q8R0F3;E9Q265;E9Q0Z7;F6QZU1	Sulfatase-modifying factor 1	Sumf1
0.426732	0.128218	0.892051	O09012-2;D3Z600;O09012	Peroxisomal targeting signal 1 receptor	Pex5
0.426246	0.182678	0.738313	Q99JW4;E9QP62;Q9D7B2;Q91XD2	LIM and senescent cell antigen-like-containing domain protein 1;LIM and senescent cell antigen-like-containing domain protein 2	Lims1;Lims2
0.426022	0.00805374	2.094	P35283;A2CG35	Ras-related protein Rab-12	Rab12
0.424978	0.00348067	2.45834	P12970;D3YVE6;L7N202;D3YXT4;D3YU93;F6U2H0;F6ZVW4;F6VBB8;F6TIC7;F6YI27;F6SSI5	60S ribosomal protein L7a	Rpl7a;Rpl7a-ps10;Gm5619;Rpl7a-ps3;Rpl7a-ps5;Gm5459;Gm4978;Rpl7a-ps8;Gm17415
0.424472	0.0784185	1.10558	P62242	40S ribosomal protein S8	Rps8
0.423202	0.00704185	2.15231	P68040	Guanine nucleotide-binding protein subunit beta-2-like 1	Gnb2l1
0.42127	0.0186062	1.73034	Q8BLF1;Q8BYQ0;D6RGP7	Neutral cholesterol ester hydrolase 1	Nceh1
0.420114	0.0729177	1.13717	Q9EPB5;Q3U3G8;F6TMN2	Serine hydrolase-like protein	Serhl
0.420058	0.173045	0.761841	P70428;A2AIG3;E9Q1M5;A2AIG6	Exostosin-2	Ext2
0.419442	0.025424	1.59476	Q8BY89-2;Q8BY89	Choline transporter-like protein 2	Slc44a2
0.419179	0.152237	0.817478	Q9D1C8	Vacuolar protein sorting-associated protein 28 homolog	Vps28
0.418977	0.0624908	1.20418	E9QP49;G5E8Y6;Q99MS7-2;Q99MS7-4;Q99MS7-5;Q99MS7-3;Q99MS7	EH domain-binding protein 1-like protein 1	Ehbp1l1
0.418443	0.0396959	1.40125	P49962;D3YZX8	Signal recognition particle 9 kDa protein	Srp9
0.418007	0.12162	0.914994	Q99J56	Derlin-1	Derl1
0.417632	0.0179648	1.74558	Q99MR3;D3Z362	Solute carrier family 12 member 9	Slc12a9
0.416839	0.205484	0.687221	Q9D289	Trafficking protein particle complex subunit 6B	Trappc6b
0.416611	0.0776109	1.11008	Q8VC04;A2A4M9;A2A4N0	Transmembrane protein 106A	Tmem106a
0.41645	0.0365825	1.43673	Q9R0P5	Destrin	Dstn
0.416171	0.000601949	3.22044	Q9CZM2;E9QAZ2;B8JKK2;E9Q1X1	60S ribosomal protein L15;Ribosomal protein L15	Rpl15;Gm10020;Gm8420
0.415066	0.00564438	2.24838	P59764	Dedicator of cytokinesis protein 4	Dock4
0.414567	0.0843529	1.0739	Q91VK4	Integral membrane protein 2C;CT-BRI3	Itm2c
0.413401	0.0186677	1.72891	O70194	Eukaryotic translation initiation factor 3 subunit D	Eif3d
0.413064	0.00876751	2.05712	P62918	60S ribosomal protein L8	Rpl8
0.412904	0.0265194	1.57644	P41105;F6Z0X0	60S ribosomal protein L28	Rpl28
0.411997	0.00103547	2.98486	Q61233;D3YZ25;D3YVW8;D3Z7D9;D3Z311	Plastin-2	Lcp1
0.411978	0.0268949	1.57033	P47963	60S ribosomal protein L13	Rpl13
0.411494	0.00035624	3.44826	Q8K297	Procollagen galactosyltransferase 1	Colgalt1
0.411461	0.187523	0.726946	Q920V1	UDP-GalNAc:beta-1,3-N-acetylgalactosaminyltransferase 1	B3galnt1
0.410469	0.184293	0.734491	E9Q5I9;Q9WVJ2;F6ZQQ3;E9Q0U1	26S proteasome non-ATPase regulatory subunit 13	Psmd13
0.410419	0.0223328	1.65106	P62627;A2AVR9	Dynein light chain roadblock-type 1	Dynlrb1
0.410175	0.22977	0.638706	K3W4Q8;P18572-2;P18572;J3QP71	Basigin	Bsg
0.409642	0.00550622	2.25915	P10639	Thioredoxin	Txn
0.407907	0.045729	1.33981	P68254-2;P68254;F6YY69;F6VW30	14-3-3 protein theta	Ywhaq
0.407497	0.22822	0.641647	A2A5V3;A2A5V2;P55194;A2A5V4;A2A5V1	SH3 domain-binding protein 1	Sh3bp1
0.407463	0.0164942	1.78267	Q9EQP2	EH domain-containing protein 4	Ehd4
0.407444	0.666162	0.17642	P55065;A2A5K2;A2A5K4;A2A5K3	Phospholipid transfer protein	Pltp
0.405402	0.307133	0.512674	O88829-2;O88829	Lactosylceramide alpha-2,3-sialyltransferase	St3gal5
0.405159	0.00570807	2.24351	P17182;Q6PHC1;B0QZL1;B1ARR7;D3Z6E4;P17183;P21550;B1ARR6;D3YVD3;D3Z2S4;J3QPZ9;Q5SX61;Q5SX60;Q5SX59	Alpha-enolase;Enolase	Eno1
0.405099	0.0602758	1.21986	Q60714	Long-chain fatty acid transport protein 1	Slc27a1
0.403653	0.00386257	2.41312	A2APX3;P21460	Cystatin-C	Cst3
0.403119	0.0182201	1.73945	P14115	60S ribosomal protein L27a	Rpl27a
0.402559	0.0983712	1.00713	Q99P65;D6RI95;D3YWS9	Equilibrative nucleoside transporter 3	Slc29a3
0.401895	0.122121	0.913211	P23116	Eukaryotic translation initiation factor 3 subunit A	Eif3a
0.39994	0.0139336	1.85594	B1AV66;Q8BR70	Protein YIPF6	Yipf6
0.399698	0.369982	0.431819	Q9Z1X2-2;Q9Z1X2;G3UYQ3;G3UWN0	Phosphatidylserine synthase 2	Ptdss2
0.398966	0.0543322	1.26494	P55096	ATP-binding cassette sub-family D member 3	Abcd3
0.398852	0.012363	1.90787	Q9CQY5;F6WHL0;A2ADH1;Q9CQY5-2;Q9CQY5-3;F6TBV1	Magnesium transporter protein 1	Magt1
0.398574	0.261498	0.582532	O35601;O35601-2	FYN-binding protein	Fyb
0.398103	0.18904	0.723445	P45376;D3YVJ7	Aldose reductase	Akr1b1;Akr1b3
0.397912	0.00247965	2.60561	Q9WUQ2;D3Z3S1;F6XLZ3	Prolactin regulatory element-binding protein	Preb
0.397793	0.0110977	1.95477	D3Z6W2;Q06180-2;Q06180	Tyrosine-protein phosphatase non-receptor type;Tyrosine-protein phosphatase non-receptor type 2	Ptpn2
0.397778	0.211179	0.675349	Q8JZU0	Nucleoside diphosphate-linked moiety X motif 13	Nudt13
0.397586	8.84886e-05	4.05311	Q3UVK0;F6TQS9;G8JL46;Q3UVK0-2	Endoplasmic reticulum metallopeptidase 1	Ermp1
0.397377	0.0224414	1.64895	Q8BL66	Early endosome antigen 1	Eea1
0.396573	0.00196159	2.70739	Q99MN1;Q8R2P8	Lysine--tRNA ligase	Kars
0.396354	0.0283645	1.54723	Q3UHD6-2;Q3UHD6;E9PW30;F6QKA8	Sorting nexin-27	Snx27
0.396164	0.0851873	1.06963	P97855	Ras GTPase-activating protein-binding protein 1	G3bp1
0.395746	0.0131074	1.88248	Q9DB25;D6RCG2	Dolichyl-phosphate beta-glucosyltransferase	Alg5
0.394755	0.285715	0.544067	D3YYK8;E9Q6X0;Q8R001-2;Q8R001;Q3TG90;D3YUY6;D3Z6G3;Q6PER3	Microtubule-associated protein RP/EB family member 2	Mapre2
0.394446	0.0885628	1.05275	Q60864	Stress-induced-phosphoprotein 1	Stip1
0.394176	0.1564	0.805764	Q8BHD0;Q8BHC1	Ras-related protein Rab-39A	Rab39a
0.393739	0.0534098	1.27238	O35704	Serine palmitoyltransferase 1	Sptlc1
0.391769	0.00663015	2.17848	Q8VBT6	Apolipoprotein B receptor	Apobr
0.391743	9.0648e-05	4.04264	P48410;A2ALN0	ATP-binding cassette sub-family D member 1	Abcd1
0.391695	0.0358182	1.4459	D3Z6Q9	Bridging integrator 2	Bin2
0.390425	0.0136057	1.86628	Q9DBG6;A2ACG7	Dolichyl-diphosphooligosaccharide--protein glycosyltransferase subunit 2	Rpn2
0.389979	0.0921995	1.03527	Q921F4;Q921F4-4	Heterogeneous nuclear ribonucleoprotein L-like	Hnrpll
0.389723	0.0362647	1.44052	P62259;F6WA09;D6REF3	14-3-3 protein epsilon	Ywhae
0.389238	0.0724979	1.13967	P62911;A2AD25;P17932;F6WJV0	60S ribosomal protein L32	Rpl32
0.387975	0.18798	0.725889	Q3TJZ6	Protein FAM98A	Fam98a
0.387893	0.0189881	1.72152	P83882	60S ribosomal protein L36a	Rpl36a
0.387302	0.0331907	1.47898	Q9CQB5;D3Z3X4	CDGSH iron-sulfur domain-containing protein 2	Cisd2
0.386647	0.00274608	2.56129	P27046;F6QMB7	Alpha-mannosidase 2	Man2a1
0.386072	0.0128326	1.89169	Q9D517	1-acyl-sn-glycerol-3-phosphate acyltransferase gamma	Agpat3
0.383821	0.0422942	1.37372	Q8BH73-2;Q8BH73	Glutaminyl-peptide cyclotransferase-like protein	Qpctl
0.38378	0.00144465	2.84024	P62717;F6YJW4	60S ribosomal protein L18a	Rpl18a
0.381126	0.145904	0.835932	Q9WTR1	Transient receptor potential cation channel subfamily V member 2	Trpv2
0.381103	0.119509	0.922599	Q9D8W7	OCIA domain-containing protein 2	Ociad2
0.38049	0.125571	0.90111	O55029	Coatomer subunit beta	Copb2
0.380425	0.171674	0.765295	Q3V209-2;Q3V209;G8JL73	Transmembrane and ubiquitin-like domain-containing protein 2	Tmub2
0.378403	0.0399799	1.39816	Q9JIW9;F6QC68	Ras-related protein Ral-B	Ralb
0.37697	0.0732155	1.1354	Q8K358;Q3TAA8	Phosphatidylinositol glycan anchor biosynthesis class U protein	Pigu
0.376848	0.067169	1.17283	Q9WTX2	Interferon-inducible double stranded RNA-dependent protein kinase activator A	Prkra
0.376442	0.00643963	2.19114	Q99M28-2;J3QK23;Q99M28	RNA-binding protein with serine-rich domain 1	Gm9825;Rnps1
0.375294	0.010332	1.98582	Q9R0A0;D6RH82	Peroxisomal membrane protein PEX14	Pex14
0.374214	0.00678773	2.16828	P06745;F6SAC3;CON__Q3ZBD7	Glucose-6-phosphate isomerase	Gpi;Gm1840
0.373584	0.411065	0.38609	D3Z158;Q8BML9;Q8R1V9;F6TDS3		Qars
0.372046	0.208375	0.681154	Q91VS7;E9QJW0;D3YU60;D3YVR3	Microsomal glutathione S-transferase 1	Mgst1
0.371183	0.0129984	1.88611	Q91V41;A2AL34	Ras-related protein Rab-14	Rab14
0.370512	0.367395	0.434867	Q8CIB6	Transmembrane protein 230	Tmem230
0.370342	0.0608062	1.21605	Q9D081	UDP-N-acetylglucosamine transferase subunit ALG14 homolog	Alg14
0.36978	0.239994	0.619799	P42227-2;P42227-3;P42227;B7ZC18	Signal transducer and activator of transcription 3	Stat3
0.369557	0.23396	0.630858	E9Q9E8		Cd84
0.369264	0.119596	0.922282	Q8R1Q8	Cytoplasmic dynein 1 light intermediate chain 1	Dync1li1
0.369086	0.221306	0.655008	Q9R062;K3W4S6;D3Z5N4	Glycogenin-1	Gyg1;Gyg
0.367573	0.00913241	2.03941	P83093;I1E4X8;F6WBP9	Stromal interaction molecule 2	Stim2
0.36735	0.229487	0.639241	P63001;Q3TLP8;P60764;A2AC13	Ras-related C3 botulinum toxin substrate 1;Ras-related C3 botulinum toxin substrate 3	Rac1;Rac3
0.366008	0.387529	0.411696	F8WIU9;Q5RKS2	Small integral membrane protein 7	Smim7
0.365669	0.00139861	2.8543	P20029	78 kDa glucose-regulated protein	Hspa5
0.36547	0.0355567	1.44908	Q8BKX1-4;Q8BKX1-3;B1AZ46;Q8BKX1-2;Q8BKX1	Brain-specific angiogenesis inhibitor 1-associated protein 2	Baiap2
0.363663	0.023103	1.63633	O70378;M0QWP2;M0QWY0;M0QWS0;M0QWI7;M0QWE2;M0QWC9	ER membrane protein complex subunit 8	Emc8
0.363114	0.00228294	2.6415	Q8BFZ9	Erlin-2	Erlin2
0.362119	0.0383377	1.41637	Q62186;Q9D8L3	Translocon-associated protein subunit delta	Ssr4
0.361771	0.00904402	2.04364	O55022	Membrane-associated progesterone receptor component 1	Pgrmc1
0.360451	0.0195872	1.70803	B1AW21;Q9Z2C5;Q3UDN6	Myotubularin	Mtm1
0.360449	0.0560954	1.25107	O09172;H3BJA3;F6VNW5	Glutamate--cysteine ligase regulatory subunit	Gclm
0.360344	0.00394326	2.40414	Q8BH59	Calcium-binding mitochondrial carrier protein Aralar1	Slc25a12
0.359968	0.285364	0.544601	Q9DD03;D3YUS4	Ras-related protein Rab-13	Rab13
0.359923	0.29151	0.535346	Q8CFA1-4;Q8CFA1-2;Q8CFA1;Q8CFA1-3;D3Z364	Interleukin-1 receptor-associated kinase-like 2	Irak2
0.359573	0.001011	2.99525	Q8C129	Leucyl-cystinyl aminopeptidase	Lnpep
0.359572	0.0126203	1.89893	P46978;D3YZN5;F6YHG5	Dolichyl-diphosphooligosaccharide--protein glycosyltransferase subunit STT3A	Stt3a
0.359043	0.10566	0.976091	P97492	Regulator of G-protein signaling 14	Rgs14
0.358585	0.108434	0.964835	P11983;P11983-2;F2Z483	T-complex protein 1 subunit alpha	Tcp1
0.358571	0.012868	1.89049	E9Q555;F7A6H4;Q3U0U2	E3 ubiquitin-protein ligase RNF213	Rnf213
0.35769	0.0907767	1.04203	Q8R1B4	Eukaryotic translation initiation factor 3 subunit C	Eif3c
0.35704	0.127177	0.895593	Q4FE56;P70398;F8VPU6;E9PWA9;G3UY52;G3UZS3	Ubiquitin carboxyl-terminal hydrolase;Probable ubiquitin carboxyl-terminal hydrolase FAF-X	Usp9x
0.355288	0.258111	0.588193	Q9CYH2;Q3U125;D3YYG8;D3Z398;D3Z252;D3Z0A8;D3Z143;D3YWL4	Redox-regulatory protein FAM213A	Fam213a
0.354514	0.209863	0.678064	Q76LS9-2;Q76LS9;Q76LS9-3	Protein FAM63A	Fam63a
0.35451	0.100086	0.999627	P42932;H3BL49;H3BJB6;H3BLL1;H3BKG2;H3BKR8	T-complex protein 1 subunit theta	Cct8
0.354083	0.454266	0.34269	E9Q6R7		Utrn
0.354036	0.00144887	2.83897	P14148;F6XI62	60S ribosomal protein L7	Rpl7
0.354031	0.223211	0.651284	A2AWP6;A2AWP8-3;A2AWP8-2;A2AWP8-4;A2AWP8;A2AWP8-5;F6S3V7;F6ZH54;A2AWP4	Rho guanine nucleotide exchange factor 10-like protein	Arhgef10l
0.35332	0.0429493	1.36704	Q9DCD0	6-phosphogluconate dehydrogenase, decarboxylating	Pgd
0.352945	0.234118	0.630565	Q9CQF8	Ribosomal protein 63, mitochondrial	Mrp63
0.35152	0.159162	0.79816	D3YZ54;Q9QXE0;E9PWM4	2-hydroxyacyl-CoA lyase 1	Hacl1
0.35148	0.0482105	1.31686	Q3ZK22;D3Z4E6;Q3ZK22-3;Q3ZK22-4;F6TIK3;D3YVB1;F7CPT8;Q3ZK22-2	Vezatin	Vezt
0.350871	0.000221068	3.65547	Q91ZR1	Ras-related protein Rab-4B	Rab4b
0.349648	0.137381	0.862074	Q61081	Hsp90 co-chaperone Cdc37	Cdc37
0.349353	0.0157986	1.80138	Q9D1Q6	Endoplasmic reticulum resident protein 44	Erp44
0.349176	0.00102119	2.99089	Q9DBG7;F6VF36	Signal recognition particle receptor subunit alpha	Srpr
0.348984	0.279237	0.554026	Q6P4T2	U5 small nuclear ribonucleoprotein 200 kDa helicase	Snrnp200
0.3489	0.284887	0.545328	Q9QZM0	Ubiquilin-2	Ubqln2
0.348296	0.0800508	1.09663	Q3TC72	Fumarylacetoacetate hydrolase domain-containing protein 2A	Fahd2
0.348289	0.157908	0.801595	Q7TNV0;E9Q8Y1;D3YVJ6	Protein DEK	Dek
0.347845	0.101218	0.994741	Q3U0I3;P80318;E9Q133;F6Q609	T-complex protein 1 subunit gamma	Cct3
0.347212	0.090695	1.04242	Q9CY57-5;Q9CY57-4;Q9CY57-3;E9PW20;Q9CY57-2;Q9CY57;D3YZA1;D3Z7T7	Chromatin target of PRMT1 protein	Chtop
0.346969	0.155115	0.809346	O08992;Q3TMX0;H3BLG5;A2AKJ9;A2AKJ6;A2AKJ5	Syntenin-1	Sdcbp
0.346819	0.0708114	1.1499	Q8C7V8-2;Q8C7V8	Coiled-coil domain-containing protein 134	Ccdc134
0.346582	0.439373	0.357166	E9Q616;G5E8K8		Ahnak
0.34623	0.000791377	3.10162	P27659;Q9CQ09;E9PWZ3	60S ribosomal protein L3	Rpl3
0.346198	0.0167067	1.77711	P58021;E9PZ69	Transmembrane 9 superfamily member 2	Tm9sf2
0.345886	0.031206	1.50576	Q6ZWQ7		Spcs3
0.344536	0.263999	0.578397	Q9D394-2;Q9D394;Q9D394-3;Q9D394-4	Protein RUFY3	Rufy3
0.344349	0.000455494	3.34152	F6RPJ9;Q9JHR7	Insulin-degrading enzyme	Ide
0.344297	0.0510953	1.29162	E9Q9M5;Q3UJD6-2;J3KMM1;Q3UJD6	Ubiquitin carboxyl-terminal hydrolase;Ubiquitin carboxyl-terminal hydrolase 19	Usp19
0.343635	0.0571746	1.2428	O09110-2;O09110;A2AGS2;P70236	Dual specificity mitogen-activated protein kinase kinase 3	Map2k3
0.341236	0.0989215	1.00471	Q9Z2M6	Ubiquitin-like protein 3	Ubl3
0.340859	0.184582	0.733811	P62315	Small nuclear ribonucleoprotein Sm D1	Snrpd1
0.340523	0.568845	0.245006	P70268;P70268-2;D6RH37	Serine/threonine-protein kinase N1	Pkn1
0.340496	0.147971	0.829823	Q9DAV9	Trimeric intracellular cation channel type B	Tmem38b
0.33964	0.137635	0.861271	O88455;D3Z7G1;D3YXR4	7-dehydrocholesterol reductase	Dhcr7
0.338835	0.0920504	1.03597	Q60737;A2ANR6;Q6NSS6	Casein kinase II subunit alpha	Csnk2a1
0.337477	0.19297	0.714511	L7N466;B2KF83;Q9D110;D3YX55;D3Z0T4;D3YTV6;F6Q785	5-formyltetrahydrofolate cyclo-ligase	Gm2382;Mthfs
0.337464	0.168073	0.774501	O54984	ATPase Asna1	Asna1
0.336592	0.0666615	1.17613	Q9CXD6;Q9CXD6-3;Q9CXD6-2	Mitochondrial calcium uniporter regulator 1	Mcur1
0.335378	0.000151462	3.8197	Q9CQX8	28S ribosomal protein S36, mitochondrial	Mrps36
0.335341	0.00221611	2.65441	Q80TN4;A2AS91	DnaJ homolog subfamily C member 16	Dnajc16
0.334879	0.30585	0.514491	P08030	Adenine phosphoribosyltransferase	Aprt
0.334811	0.0101805	1.99223	Q6GQT9	Nodal modulator 1	Nomo1
0.334214	0.374669	0.426352	P15702	Leukosialin	Spn
0.33391	0.114898	0.939687	Q80VA0-2;Q80VA0;Q80VA0-3	N-acetylgalactosaminyltransferase 7	Galnt7
0.332457	0.310705	0.507652	P35550	rRNA 2-O-methyltransferase fibrillarin	Fbl
0.332345	0.0537693	1.26947	Q8VHE0	Translocation protein SEC63 homolog	Sec63
0.332215	0.274104	0.562085	Q9QXH4	Integrin alpha-X	Itgax
0.332131	0.119622	0.92219	Q8BYC6;Q3V3K3;F6RXB5;Q6ZQ29-2;Q6ZQ29	Serine/threonine-protein kinase TAO3	Taok3
0.331812	0.236492	0.626184	D3Z286		Tmppe
0.331301	0.274238	0.561872	Q9CYN9	Renin receptor	Atp6ap2
0.330907	0.693003	0.159265	Q9MD59;P03893	NADH-ubiquinone oxidoreductase chain 2	mt-Nd2;Mtnd2
0.330713	0.290081	0.537481	G5E8V9;E9Q3G5;A2RSX9;E9QAY5		Arfip1
0.330275	0.00880794	2.05513	Q9D8E6	60S ribosomal protein L4	Rpl4
0.329779	0.129281	0.888465	P63094;Q6R0H7;P63094-3;P63094-2;Q6R0H7-4;Q8CGK7;Q66L47;A2A610	Guanine nucleotide-binding protein G(s) subunit alpha isoforms short;Guanine nucleotide-binding protein G(s) subunit alpha isoforms XLas	Gnas
0.329751	0.0259772	1.58541	E9Q421;Q8BXX3;Q9CXY9;Q8BL63	GPI-anchor transamidase	Pigk
0.328986	0.101156	0.99501	D3YX34;E9Q586;O08788-2;E9Q3M3;O08788	Dynactin subunit 1	Dctn1
0.328187	0.0292602	1.53372	Q9WUR2-2;Q3TCD4;Q9WUR2;E9PYC6;E9Q858;E9PUY9;E9PYA9;E9PVM6;E9Q7A8;E9PY42;Q78JN3	Enoyl-CoA delta isomerase 2, mitochondrial	Eci2
0.327694	0.0508601	1.29362	Q9CZD5;D3YWL2;D3Z0H9	Translation initiation factor IF-3, mitochondrial	Mtif3
0.32723	0.0453101	1.3438	Q8C6B0;H3BJI7;Q76I24;Q5I0W6;Q76I26;G3X9G9		Mettl7a1
0.327001	0.264158	0.578136	P82198	Transforming growth factor-beta-induced protein ig-h3	Tgfbi
0.326667	0.272081	0.565302	Q8C2Q3;E9QL13;Q8C2Q3-2;J3QN51;J3QPT3;B0LM42;F7BGR7	RNA-binding protein 14	Rbm14
0.325457	0.0180408	1.74374	P62821	Ras-related protein Rab-1A	Rab1A
0.325382	0.128463	0.891222	Q921M7	Protein FAM49B	Fam49b
0.32511	0.0116934	1.93206	Q9JL25-2;Q9JL25	Regulator of G-protein signaling 1	Rgs1
0.324997	0.156117	0.806549	G3UZJ5;P67871;G3UZA4;G3UZX4;G3UWU5;G3UXG7;G3UXU2	Casein kinase II subunit beta	Csnk2b
0.324598	0.0117306	1.93068	Q8BYI6;Q8BYI6-2;Q8BYI6-3	Lysophosphatidylcholine acyltransferase 2	Lpcat2
0.324445	0.159446	0.797387	Q8R4B8-3;Q8R4B8;Q8R4B8-2;Q8R4B8-4;Q5SXI6	NACHT, LRR and PYD domains-containing protein 3	Nlrp3
0.323601	0.226993	0.643988	Q3TLH4-5;Q3TLH4	Protein PRRC2C	Prrc2c
0.323505	0.147609	0.830886	Q9ERU9	E3 SUMO-protein ligase RanBP2;Putative peptidyl-prolyl cis-trans isomerase	Ranbp2
0.323467	0.0966971	1.01459	Q9Z1T1;Q9JME5;E9Q1S6	AP-3 complex subunit beta-1	Ap3b1
0.323031	0.017185	1.76485	Q3TDQ1	Dolichyl-diphosphooligosaccharide--protein glycosyltransferase subunit STT3B	Stt3b
0.321656	0.208004	0.681928	A2AFY6;E9PVB5;A2AFY7;A2AGG1		Ttc17
0.32163	4.14639e-05	4.38233	Q9QUJ7-2;Q9QUJ7	Long-chain-fatty-acid--CoA ligase 4	Acsl4
0.321114	0.232815	0.632989	Q6ZWV7;G3UWD7	60S ribosomal protein L35	Rpl35;Gm10269
0.319568	0.00385804	2.41363	Q6ZQM8;Q62452;E9PXN7;D3Z748;D3YZ96;D6RH94	UDP-glucuronosyltransferase 1-7C	Ugt1a7c
0.31946	0.0916326	1.03795	P47757-2;A2AMW0;A2AMV7;P47757;F7CAZ6;F6QJN8;F6YHZ8	F-actin-capping protein subunit beta	Capzb
0.319324	0.241461	0.617152	Q91V92;Q3V117;Q3TS02	ATP-citrate synthase	Acly
0.319248	0.0972394	1.01216	Q91X21;Q91X21-2	Uncharacterized protein KIAA2013	Kiaa2013
0.319203	0.304068	0.51703	Q05685	Folate receptor beta	Folr2
0.318995	0.151163	0.820555	Q63850	Nuclear pore glycoprotein p62	Nup62
0.31853	0.0231978	1.63455	P99029-2;P99029;G3UZJ4;H3BJQ7	Peroxiredoxin-5, mitochondrial	Prdx5
0.318277	0.040555	1.39196	P35564	Calnexin	Canx
0.317962	0.0127252	1.89534	Q80UU9	Membrane-associated progesterone receptor component 2	Pgrmc2
0.317909	0.0069487	2.1581	Q62087;H3BL07;H3BKW4	Serum paraoxonase/lactonase 3	Pon3
0.317605	0.193258	0.713862	Q9Z1N5;G3UXI6	Spliceosome RNA helicase Ddx39b	Ddx39b
0.317396	0.0821066	1.08562	P62141	Serine/threonine-protein phosphatase PP1-beta catalytic subunit	Ppp1cb
0.316348	0.169388	0.771118	Q91V55;D3YYM6;P97461	40S ribosomal protein S5;40S ribosomal protein S5, N-terminally processed	Rps5
0.31607	0.042717	1.3694	P63101;D3YXN6;D3YXF4;D3YW45	14-3-3 protein zeta/delta	Ywhaz
0.315727	0.465266	0.332298	P26883;F6X9I3	Peptidyl-prolyl cis-trans isomerase FKBP1A;Peptidyl-prolyl cis-trans isomerase	Fkbp1a
0.315277	0.0183864	1.7355	Q7TMB8;Q7TMB8-2;E9PZS0;G3UZI5	Cytoplasmic FMR1-interacting protein 1	Cyfip1
0.314551	0.111981	0.950854	Q80Y14	Glutaredoxin-related protein 5, mitochondrial	Glrx5
0.314437	0.0699922	1.15495	P32883-2;P32883	GTPase KRas;GTPase KRas, N-terminally processed	Kras
0.313773	0.157659	0.802282	P62317;D3Z5N9	Small nuclear ribonucleoprotein Sm D2	Snrpd2;Gm5449
0.313124	0.0279366	1.55383	D3Z5I1;Q3UPF5;Q3UPF5-2;G3X9X5	Zinc finger CCCH-type antiviral protein 1	Zc3hav1
0.312696	0.735971	0.133139	Q9CR84;P56384;P56383	ATP synthase lipid-binding protein, mitochondrial	Atp5g1;Atp5g3;Atp5g2
0.312288	0.197549	0.704326	O54774	AP-3 complex subunit delta-1	Ap3d1
0.312261	0.2601	0.58486	P25799-2;P25799-3;P25799;P25799-4;P25799-7;P25799-6;F6Z9G5;P25799-5	Nuclear factor NF-kappa-B p105 subunit;Nuclear factor NF-kappa-B p50 subunit	Nfkb1
0.312035	0.0848987	1.0711	Q8R1K1	Ubiquitin-associated domain-containing protein 2	Ubac2
0.311558	0.0708905	1.14941	Q6A0D4;D3Z731	Raftlin	Rftn1
0.310822	0.183625	0.736068	P22437	Prostaglandin G/H synthase 1	Ptgs1
0.310815	0.0258193	1.58806	Q62086	Serum paraoxonase/arylesterase 2	Pon2
0.309947	0.0492519	1.30758	Q8CHK3;D3YU33;F6UP63	Lysophospholipid acyltransferase 7	Mboat7
0.309015	0.242247	0.615741	Q9QYC7	Vitamin K-dependent gamma-carboxylase	Ggcx
0.308514	0.150773	0.821677	Q80XL6;D3YTQ5;F6U473	Acyl-CoA dehydrogenase family member 11	Acad11
0.30819	0.0185219	1.73232	Q9CWZ7;D3Z4B2	Gamma-soluble NSF attachment protein	Napg
0.306992	0.0486507	1.31291	P35290	Ras-related protein Rab-24	Rab24
0.305088	0.107828	0.96727	P70315	Wiskott-Aldrich syndrome protein homolog	Was
0.30325	0.0103254	1.98609	P84096	Rho-related GTP-binding protein RhoG	Rhog
0.302801	0.243386	0.613705	Q9ERB0	Synaptosomal-associated protein 29	Snap29
0.302748	0.221511	0.654604	P63325;Q3UW83;J3QNI7	40S ribosomal protein S10	Rps10;Rps10-ps1
0.30237	0.180465	0.743608	Q9CQP0;Q8R0E2	39S ribosomal protein L33, mitochondrial	Mrpl33
0.302029	0.256219	0.591388	B7FAU9;Q8BTM8;B7FAV1;F6XC15;J3JS91;Q8BTM8-2;F6Z2C0;F7AVL7	Filamin-A	Flna
0.300389	0.0179198	1.74667	Q8BGF6	ELMO domain-containing protein 2	Elmod2
0.300367	0.217641	0.662259	P11352	Glutathione peroxidase 1	Gpx1
0.298906	0.299513	0.523584	Q9CZB0;F8WGB3;D3Z1A8	Succinate dehydrogenase cytochrome b560 subunit, mitochondrial	Sdhc
0.298607	0.224646	0.648501	P83887;Q8VCK3	Tubulin gamma-1 chain;Tubulin gamma-2 chain	Tubg1;Tubg2
0.298219	0.163444	0.786631	P62245;F8WJ41;D3Z712;D3YVB4	40S ribosomal protein S15a	Rps15a
0.297993	0.215639	0.666272	Q3V384;F6VT60;E9Q4K2	Lactation elevated protein 1	Lace1
0.29753	0.0982828	1.00752	P41241;D3YVQ8;D6RGA0;P41242-3;D3Z4T5;P41242;P41242-2	Tyrosine-protein kinase CSK	Csk
0.296388	0.497836	0.302914	Q62426	Cystatin-B	Cstb
0.296375	0.200682	0.697491	Q5SUH6;Q5SUH7;Q99KN9-2;Q99KN9	Clathrin interactor 1	Clint1
0.296302	0.167289	0.776534	Q9WUH1	Transmembrane protein 115	Tmem115
0.295456	0.0718482	1.14358	P97351;D3Z6C3;D3Z7W7	40S ribosomal protein S3a	Rps3a;Rps3a2;Rps3a3
0.295443	0.0468746	1.32906	Q9D835;Q9CR48;D3Z6B7;D3YZH9	DNA damage-regulated autophagy modulator protein 2	Dram2
0.295037	0.00458987	2.3382	Q9CR57	60S ribosomal protein L14	Rpl14
0.294989	0.125699	0.900667	Q6P3A8;Q6P3A8-2	2-oxoisovalerate dehydrogenase subunit beta, mitochondrial	Bckdhb
0.294488	0.0605724	1.21773	P35279	Ras-related protein Rab-6A	Rab6a
0.29301	0.0364759	1.43799	P97449	Aminopeptidase N	Anpep
0.292849	0.0801962	1.09585	Q8CFJ7;D3Z5G2;Q8CFJ7-2;D3Z2H6;F6ZZX2	Solute carrier family 25 member 45	Slc25a45
0.292654	0.0906871	1.04245	E9PWY9;Q8C0C7;D6RIJ2	Phenylalanine--tRNA ligase alpha subunit	Farsa
0.292494	0.275657	0.559631	P11930	Nucleoside diphosphate-linked moiety X motif 19, mitochondrial	Nudt19
0.292359	0.0171833	1.76489	Q6Y685-2;Q6Y685;F8VQ95	Transforming acidic coiled-coil-containing protein 1	Tacc1
0.290477	0.2169	0.66374	Q9CQR6	Serine/threonine-protein phosphatase 6 catalytic subunit	Ppp6c
0.289882	0.458	0.339135	P98086	Complement C1q subcomponent subunit A	C1qa
0.288447	0.427371	0.369195	Q5SUA5;Q5SYD0-2;Q5SYD0	Unconventional myosin-Ig	Myo1g
0.288279	0.0651609	1.18601	Q9D136	2-oxoglutarate and iron-dependent oxygenase domain-containing protein 3	Ogfod3
0.288024	0.019559	1.70865	Q9WTK3;E9PW03;E9QA52;F6T7Y8;E9Q4I5	Glycosylphosphatidylinositol anchor attachment 1 protein	Gpaa1
0.287516	0.00905358	2.04318	Q3TAS6-2;Q3TAS6;D3Z665	ER membrane protein complex subunit 10	Emc10
0.286859	0.11822	0.927309	Q9ESD6-2;Q9ESD6	CKLF-like MARVEL transmembrane domain-containing protein 7	Cmtm7
0.286574	0.12918	0.888804	Q8VEA8;D3YZQ6;Q8VEA8-2;D3Z4X4	Ras-related protein Rab-7b	Rab7b;5430435G22Rik
0.284566	0.54819	0.261069	Q8BH47	Vesicle-trafficking protein SEC22a	Sec22a
0.283782	0.346738	0.459998	Q5XKN4	Protein jagunal homolog 1	Jagn1
0.283307	0.140501	0.852319	P61255;B1ARA3;B1ARA5;K4DI68	60S ribosomal protein L26	Rpl26;mCG_9098
0.282963	0.133866	0.87333	Q9ERY9;D3YUR8	Probable ergosterol biosynthetic protein 28	ORF11;0610007P14Rik
0.282696	0.124725	0.904047	G3X972		Sec24c
0.282649	0.16949	0.770855	G3UZI3;E9PWV3;P18653;Q505N6;F6RQA2;F6Q8A4;Q8C0P0-2;Q8C0P0;E9Q6G0;E9Q4Q9;Q811L6-2;E9Q1M8;E9Q8S5;Q3U214;E9PWX8;E9QPR4;Q811L6	Ribosomal protein S6 kinase;Ribosomal protein S6 kinase alpha-1	Rps6ka1
0.28256	0.446349	0.350326	Q8R361	Rab11 family-interacting protein 5	Rab11fip5
0.282149	0.357384	0.446864	P42859;G3X9H5;P42859-2	Huntingtin	Htt
0.281834	0.139654	0.854948	Q93092	Transaldolase	Taldo1
0.281245	0.185199	0.732362	Q3UUQ7	GPI inositol-deacylase	Pgap1
0.281007	0.197304	0.704865	Q8C570;A2ASC6	mRNA export factor	Rae1
0.280606	0.244323	0.612036	Q76MZ3;G3UWL2;H3BLQ0;Q7TNP2;Q3TTF6;H3BKU1;G3UWS4;H3BIV7;H3BLE7;G3UXQ1;H3BJ83	Serine/threonine-protein phosphatase 2A 65 kDa regulatory subunit A alpha isoform	Ppp2r1a
0.280559	0.106819	0.971351	Q64516-1;B1ASZ3;Q64516-2;Q64516;Q8C635;Q9WU65	Glycerol kinase	Gyk;Gk
0.280268	0.00109286	2.96144	Q4PJX1;Q4PJX1-3;Q4PJX1-2	Protein odr-4 homolog	Odr4
0.280116	0.126874	0.896627	Q04207-2;Q04207	Transcription factor p65	Rela
0.278605	0.19094	0.719104	P62880;E9QKR0;D3YZX3;D3Z1M1;D3Z1T4;E9PWM7	Guanine nucleotide-binding protein G(I)/G(S)/G(T) subunit beta-2	Gnb2
0.278508	0.23516	0.628637	Q8VDN2;Q91WH7;Q64436;E9QNX7	Sodium/potassium-transporting ATPase subunit alpha-1	Atp1a1
0.278374	0.334326	0.47583	Q91X51	Golgi reassembly-stacking protein 1	Gorasp1
0.278316	0.0407859	1.38949	Q9JKN1	Zinc transporter 7	Slc30a7
0.27779	0.59778	0.223458	Q9DAY5	UPF0669 protein C6orf120 homolog
0.277685	0.496429	0.304143	O70200;G3UYJ2	Allograft inflammatory factor 1	Aif1
0.276767	0.157929	0.801537	Q9Z257;D3Z5U5;Q9Z256;Q9JJX6-3;Q9JJX6;D3YYR5;Q9JJX6-4;Q9JJX6-2	P2X purinoceptor;P2X purinoceptor 4	P2rx4
0.276654	0.319641	0.495337	Q80TH2-1;Q80TH2;B7ZNX6;Q80TH2-2	Protein LAP2	Erbb2ip
0.276593	0.199056	0.701024	Q8VCH7	Retinol dehydrogenase 10	Rdh10
0.27635	0.11067	0.95597	Q9JL56;D3Z3E2	Glycerophosphodiester phosphodiesterase 1	Gde1
0.275414	0.311419	0.506655	Q9JJU8	SH3 domain-binding glutamic acid-rich-like protein	Sh3bgrl
0.275308	0.0728298	1.13769	A2AHX9;Q64373-2;Q9QWX2;Q64373-3;Q64373-4;Q64373;A2AHX8;A2AHX7	Bcl-2-like protein 1	Bcl2l1
0.274491	0.0140197	1.85326	D3YU17;Q8VCM8;F6S731	Nicalin	Ncln
0.274256	0.0381894	1.41806	Q8C7H1	Methylmalonic aciduria type A homolog, mitochondrial	Mmaa
0.274136	0.19772	0.70395	Q8VDM6;Q8VDM6-2;Q8VDM6-3	Heterogeneous nuclear ribonucleoprotein U-like protein 1	Hnrnpul1
0.274037	0.180998	0.742327	P49710;E9Q4E5	Hematopoietic lineage cell-specific protein	Hcls1
0.273828	0.101262	0.994551	Q8BNI4;Q3U957;Q8BNI4-2;J3QMQ7;J3QMF4;Q9D8K3-2;Q9D8K3	Derlin-2	Derl2
0.273793	0.026065	1.58394	O88342	WD repeat-containing protein 1	Wdr1
0.272516	0.0256601	1.59074	Q80XM9-2;Q80XM9;Q80XM9-3;Q80XM9-4;D3YYH5;D3Z2D5	PQ-loop repeat-containing protein 1	Pqlc1
0.272361	0.247179	0.606988	Q9D964	Glycine amidinotransferase, mitochondrial	Gatm
0.272266	0.252887	0.597073	Q9DCM2	Glutathione S-transferase kappa 1	Gstk1
0.272144	0.0437927	1.3586	Q8VC19;D6RGR8	5-aminolevulinate synthase, nonspecific, mitochondrial	Alas1
0.272103	0.116838	0.932416	Q9EQ06;Q9EQ06-2;A8Y5N4;Q8VCR2-2;Q8VCR2	Estradiol 17-beta-dehydrogenase 11	Hsd17b11
0.271233	0.356636	0.447774	D3Z2R5		Sepn1
0.270347	0.528789	0.276718	Q8K310	Matrin-3	Matr3
0.270078	0.321596	0.49269	E9Q6C1;F6UHR6;E9PXZ2;A2A8Z1;Q5FWX7;A2A8Z1-2	Oxysterol-binding protein;Oxysterol-binding protein-related protein 9	Osbpl9
0.269522	0.337848	0.471279	Q80U58-3;Q3TQ29;Q80U58-2;Q3UR91;Q80U58;F6YD01;E9Q4Q6;E9PW51	Pumilio homolog 2	Pum2
0.269385	0.144291	0.840761	P35831	Tyrosine-protein phosphatase non-receptor type 12	Ptpn12
0.269295	0.0756661	1.1211	D3YX52;P58749	Transmembrane 6 superfamily member 1	Tm6sf1
0.269065	0.133327	0.875081	P25444;L7N240;D3YVC1;D3YWJ3;D3Z659;J3QMG5;L7N453;D3Z536;E9Q1N8;F6YTZ4;J3QM94	40S ribosomal protein S2	Rps2;Gm6139;Rps2-ps6;Gm5786;Gm8225;Gm18025;Gm6576;Gm5070
0.268388	0.0288888	1.53927	P61804	Dolichyl-diphosphooligosaccharide--protein glycosyltransferase subunit DAD1	Dad1
0.267532	0.218428	0.660691	P10852	4F2 cell-surface antigen heavy chain	Slc3a2
0.267496	0.172281	0.763762	Q9CQW0	ER membrane protein complex subunit 6	Emc6
0.267279	0.0668764	1.17473	A2A547;P84099	60S ribosomal protein L19	Rpl19
0.267224	0.227503	0.643012	P62827;Q14AA6;Q61820	GTP-binding nuclear protein Ran;GTP-binding nuclear protein Ran, testis-specific isoform	Ran;1700009N14Rik;Rasl2-9
0.266488	0.291362	0.535566	Q8C0P5;B1AVH5	Coronin-2A;Coronin	Coro2a
0.266332	0.542464	0.265629	P43024;Q9DCW5	Cytochrome c oxidase subunit 6A1, mitochondrial;Cytochrome c oxidase subunit 6A, mitochondrial	Cox6a1
0.265693	0.0332364	1.47839	Q99KF1	Transmembrane emp24 domain-containing protein 9	Tmed9
0.265413	0.337883	0.471234	D6RFN5;O70131;D3YW25	Ninjurin-1	Ninj1
0.264365	0.27576	0.559469	Q9JKF1	Ras GTPase-activating-like protein IQGAP1	Iqgap1
0.264318	0.397982	0.400136	Q8K3G9;D3Z340;D6RFR7;H3BJX0;H3BL43	DCC-interacting protein 13-beta	Appl2
0.264207	0.31836	0.497082	Q3UDW8;Q3UDW8-2	Heparan-alpha-glucosaminide N-acetyltransferase	Hgsnat
0.262773	0.242886	0.614597	Q8C3X8	Lipase maturation factor 2	Lmf2
0.262682	0.0988465	1.00504	Q9DAS9	Guanine nucleotide-binding protein G(I)/G(S)/G(O) subunit gamma-12	Gng12
0.26245	0.222666	0.652347	B9EKI3;D6RJK7	TATA element modulatory factor	Tmf1
0.261562	0.122146	0.91312	P24270;A2AL20	Catalase	Cat
0.261496	0.0631321	1.19975	Q3U0V2	Tumor necrosis factor receptor type 1-associated DEATH domain protein	Tradd
0.261271	0.177385	0.751083	P46638;G3UZD3;G3UZL4;D3YYB3;Q9WTL2	Ras-related protein Rab-11B	Rab11b
0.260992	0.260273	0.584571	P70452;D6RJ29	Syntaxin-4	Stx4
0.260468	0.458765	0.338409	Q3UND0-2;Q3UND0	Src kinase-associated phosphoprotein 2	Skap2
0.257907	0.0653834	1.18453	Q9CY50	Translocon-associated protein subunit alpha	Ssr1
0.256614	0.102186	0.990607	Q61599;D3YWL7	Rho GDP-dissociation inhibitor 2	Arhgdib
0.256508	0.0961918	1.01686	Q6PD26	GPI transamidase component PIG-S	Pigs
0.256505	0.126953	0.896358	Q3UMC0;D3Z0U5;D6RGM7;Q9D3R6-3;D3Z4J2;Q9D3R6	Spermatogenesis-associated protein 5	Spata5
0.256306	0.0102231	1.99042	P47911;E9PUX4	60S ribosomal protein L6	Rpl6;Gm5428
0.256278	0.0735754	1.13327	E9QM21;Q91WX5;O08734;F7CUQ1	Bcl-2 homologous antagonist/killer	Bak1
0.256273	0.34348	0.464098	D0QMC3	Myeloid cell nuclear differentiation antigen-like protein	Mndal
0.25625	0.505129	0.296597	Q5EG47;Q8BRK8	5-AMP-activated protein kinase catalytic subunit alpha-1	Prkaa1
0.256062	0.291179	0.535841	Q60605-2;Q60605;Q8CI43	Myosin light polypeptide 6	Myl6
0.255651	0.281853	0.549977	H7BX26;Q6A065;Q6A065-2;Q6A065-3;Q80U49-2	Centrosomal protein of 170 kDa	Cep170
0.255477	0.219438	0.658689	P68510	14-3-3 protein eta	Ywhah
0.25538	0.241944	0.616285	Q8BUB4	WD repeat and FYVE domain-containing protein 2	Wdfy2
0.255333	0.544216	0.264228	P19973;A2A6J7;P19973-2;A2A6J4	Lymphocyte-specific protein 1	Lsp1
0.255281	0.426069	0.370521	Q3TP92;J3QPC9	CTD nuclear envelope phosphatase 1	Ctdnep1
0.255208	0.305467	0.515035	A2AJ15;A2AJ14	Endoplasmic reticulum mannosyl-oligosaccharide 1,2-alpha-mannosidase	Man1b1
0.254858	0.0130391	1.88475	Q8BXZ1	Protein disulfide-isomerase TMX3	Tmx3
0.254626	0.0832661	1.07953	Q3UN04	Ubiquitin carboxyl-terminal hydrolase 30	Usp30
0.253119	0.0852825	1.06914	P19253;E9Q5A0;D3YY61	60S ribosomal protein L13a	Rpl13a
0.253016	0.00604064	2.21892	P62751;D3YWP3;D3Z1D6;D3YU45;D3YU46;D3YTY6;D3YW68	60S ribosomal protein L23a	Rpl23a;Rpl23a-ps3;Gm10335;Gm3940;Gm10923
0.251753	0.190754	0.719527	Q8VCS3	Glycosaminoglycan xylosylkinase	Fam20b
0.251428	0.189438	0.722532	Q8C0I1;A2AL50;H3BKN2;A2AL49;H3BIY5;H3BJ14	Alkyldihydroxyacetonephosphate synthase, peroxisomal	Agps
0.250885	0.379514	0.420773	P27546-2;P27546;E9QPW8;P27546-3;F7CK47;E9PZ43;P27546-4;E9PWC0;Q78TF3;F6XPV7;F6V4Z1	Microtubule-associated protein 4;Microtubule-associated protein	Map4
0.250568	0.322803	0.491062	Q9D4V7;Q9D4V7-2	Rab-like protein 3	Rabl3
0.250413	0.439717	0.356827	P13808;P13808-2;P13808-3;P13808-4;P13808-5;D3YUF1;D3Z5G3;F6Q7T0;D3Z5A2;P16283-2;P16283-3;F8WHM3;P16283	Anion exchange protein 2	Slc4a2
0.250272	0.129755	0.886877	Q8C2L6	Transmembrane protein 161B	Tmem161b
0.249556	0.0696478	1.15709	O70152;A2BDX2;F8WII3	Dolichol-phosphate mannosyltransferase	Dpm1
0.249003	0.227088	0.643805	P99027	60S acidic ribosomal protein P2	Rplp2
0.249	0.343197	0.464456	P63087;P63087-2	Serine/threonine-protein phosphatase PP1-gamma catalytic subunit	Ppp1cc
0.248837	0.11902	0.924379	Q8K1X4		Nckap1l
0.248215	0.218995	0.659566	Q9DCW4	Electron transfer flavoprotein subunit beta	Etfb
0.24814	0.40691	0.390501	P21279;P21278;P30677	Guanine nucleotide-binding protein G(q) subunit alpha	Gnaq
0.247355	0.191636	0.717523	E9QA46;Q9QXY9;D3Z6X3;D3Z6X4	Peroxisomal biogenesis factor 3	Pex3
0.247194	0.350699	0.455065	P97765;A2A860	WW domain-binding protein 2	Wbp2
0.246255	0.201678	0.695341	Q6ZQ08-2;Q6ZQ08;Q6ZQ08-4;B7ZWL1;Q6ZQ08-3	CCR4-NOT transcription complex subunit 1	Cnot1
0.24571	0.0878627	1.0562	B1ATS5;Q64518;B1ATS4;Q64518-2;Q64518-3;E9Q559	Sarcoplasmic/endoplasmic reticulum calcium ATPase 3	Atp2a3
0.24556	0.403789	0.393845	O89086;Q8BG13	Putative RNA-binding protein 3	Rbm3
0.245333	0.513009	0.289875	Q5SSZ5;Q5SSZ5-2;Q8CGB6-2;Q8CGB6-4;Q8CGB6;Q8CGB6-3;E9Q0S6	Tensin-3	Tns3
0.244887	0.0255634	1.59238	Q80UM7	Mannosyl-oligosaccharide glucosidase	Mogs
0.244514	0.118404	0.926632	Q9DCB8	Iron-sulfur cluster assembly 2 homolog, mitochondrial	Isca2
0.243574	0.0358079	1.44602	D3Z2J6;Q9D710;D3YYX0	Thioredoxin-related transmembrane protein 2	Tmx2
0.243021	0.371428	0.430125	Q9R0Q9;Q8R0J2;E9PVP3;Q5F2B1;F6XX36;F6ZGG4	Mannose-P-dolichol utilization defect 1 protein	Mpdu1
0.242475	0.343407	0.46419	Q925N2	Sideroflexin-2	Sfxn2
0.241175	0.112966	0.947054	Q8VBT0;F6V084	Thioredoxin-related transmembrane protein 1	Tmx1
0.240361	0.042791	1.36865	P40630-2;P40630;D3Z0F3	Transcription factor A, mitochondrial	Tfam
0.240218	0.294723	0.530586	Q99J27	Acetyl-coenzyme A transporter 1	Slc33a1
0.239303	0.105538	0.976592	P61620;A2ATT9	Protein transport protein Sec61 subunit alpha isoform 1	Sec61a1
0.23923	0.0676023	1.17004	Q62465	Synaptic vesicle membrane protein VAT-1 homolog	Vat1
0.239186	0.263449	0.579303	F7BJB9		Morc3
0.239061	0.274242	0.561866	Q3U7G2;Q05910;E9Q359;G3UXF8	Disintegrin and metalloproteinase domain-containing protein 8	Adam8
0.238957	0.258547	0.587461	P62307	Small nuclear ribonucleoprotein F	Snrpf
0.238411	0.113642	0.944463	Q8VBZ3	Cleft lip and palate transmembrane protein 1 homolog	Clptm1
0.23764	0.0578584	1.23763	Q8CHT0	Delta-1-pyrroline-5-carboxylate dehydrogenase, mitochondrial	Aldh4a1
0.237515	0.129713	0.887016	O70572;D6RGM4	Sphingomyelin phosphodiesterase 2	Smpd2
0.237493	0.408975	0.388303	Q61165	Sodium/hydrogen exchanger 1	Slc9a1
0.23578	0.249076	0.603668	P63321	Ras-related protein Ral-A	Rala
0.235632	0.428645	0.367902	O70161-3;O70161;F8WHW6;O70161-2;F7C0X9;F6SMP3;P70181-2;P70181	Phosphatidylinositol 4-phosphate 5-kinase type-1 gamma	Pip5k1c
0.235575	0.210718	0.676299	Q5I012-3;Q5I012;J3QNE8;Q5I012-4;Q5I012-2;Q5I012-5;Q5I012-6	Putative sodium-coupled neutral amino acid transporter 10	Slc38a10
0.235525	0.000401724	3.39607	Q8BI84;Q8BI84-2;Q8BI84-3	Melanoma inhibitory activity protein 3	Mia3
0.235385	0.425669	0.370928	F6X5P5;Q6PE15-2;Q6PE15	Mycophenolic acid acyl-glucuronide esterase, mitochondrial	Abhd10
0.234157	0.233298	0.632089	Q8VDI9;E0CZF3;E0CZ10;H3BJ25;H3BJK6	Alpha-1,2-mannosyltransferase ALG9	Alg9
0.233852	0.0933078	1.03008	E9PVA8;Q8BIX2		Gcn1l1
0.233567	0.0412999	1.38405	Q8BXQ2;B7ZC19	GPI transamidase component PIG-T	Pigt
0.233486	0.118083	0.927812	Q9WUD1	STIP1 homology and U box-containing protein 1	Stub1
0.233157	0.110205	0.957799	Q8BGC4	Zinc-binding alcohol dehydrogenase domain-containing protein 2	Zadh2
0.232665	0.19549	0.708875	Q9QXW9	Large neutral amino acids transporter small subunit 2	Slc7a8
0.231891	0.100093	0.999595	P50427	Steryl-sulfatase	Sts
0.228637	0.26228	0.581235	Q9D2G2;Q9D2G2-2	Dihydrolipoyllysine-residue succinyltransferase component of 2-oxoglutarate dehydrogenase complex, mitochondrial	Dlst
0.227952	0.465319	0.332249	O08599;O08599-2	Syntaxin-binding protein 1	Stxbp1
0.227405	0.24934	0.603208	Q99LA2;E9PW12;Q9JMD0;B1AQG7;Q8CCB2;M0QWF0		Zfp207
0.226811	0.0307702	1.51187	P51150	Ras-related protein Rab-7a	Rab7a
0.226807	0.406019	0.391454	Q80V53;A2AQV2	Carbohydrate sulfotransferase 14	Chst14
0.224431	0.166269	0.779189	E9Q137;Q3TXY2		Tex264
0.224034	0.418717	0.378079	Q8VBZ0	Dehydrogenase/reductase SDR family member on chromosome X homolog	Dhrsx
0.22389	0.0905073	1.04332	Q91YQ5	Dolichyl-diphosphooligosaccharide--protein glycosyltransferase subunit 1	Rpn1
0.223407	0.172266	0.763801	Q8R0X7;D6REF7;D3YZT4;D3YY13;D3Z1Z3	Sphingosine-1-phosphate lyase 1	Sgpl1
0.22334	0.0843691	1.07382	Q8R127;J3QNN5	Saccharopine dehydrogenase-like oxidoreductase	Sccpdh
0.222755	0.0296075	1.5286	Q3V009;Q3V009-2	Transmembrane emp24 domain-containing protein 1	Tmed1
0.222477	0.135094	0.869364	Q9DAM5;A2A9V7;A2A9V4;A2A9V5	Mitochondrial thiamine pyrophosphate carrier	Slc25a19
0.221705	0.34871	0.457535	G3X9K3;D3YYK9	Brefeldin A-inhibited guanine nucleotide-exchange protein 1	Arfgef1
0.220949	0.171105	0.766738	Q9EPL0;F2Z436;G3UZH1	Xylosyltransferase 2	Xylt2
0.220206	0.271003	0.567025	O08583;O08583-2;G3X9I4	THO complex subunit 4	Alyref;Alyref2
0.219886	0.193848	0.712539	Q9CRD0;Q9CRD0-2;Q9CRD0-3	OCIA domain-containing protein 1	Ociad1
0.219746	0.0707127	1.1505	Q9CX30-2;Q9CX30;D3YY42;D3Z5F9	Protein YIF1B	Yif1b
0.219468	0.279581	0.553492	Q8BVU5;A2AH27;A2AH28;A2AH29	ADP-ribose pyrophosphatase, mitochondrial	Nudt9
0.219115	0.305695	0.514712	Q8CG29;P70248;G3V011;G3UZR3	Unconventional myosin-If	Myo1f
0.218858	0.244944	0.610933	Q8BVI5;F7CJY7;F6X4N5;B7ZCB9;B7ZCB8;B7ZCB7	Syntaxin-16	Stx16
0.218538	0.372725	0.428611	P80315;G5E839;G3UYW5;G3UXF3;G3UXG2	T-complex protein 1 subunit delta	Cct4
0.217685	0.21377	0.670053	P22892;Q8CBB7	AP-1 complex subunit gamma-1	Ap1g1
0.217417	0.179275	0.746481	Q9CR76	Transmembrane protein 186	Tmem186
0.21701	0.223189	0.651327	Q9DB34	Charged multivesicular body protein 2a	Chmp2a
0.216773	0.434164	0.362347	Q921Y4	Major facilitator superfamily domain-containing protein 5	Mfsd5
0.216498	0.157039	0.803992	Q11011;F6QYF8;E9Q039;E9Q6F4;F6V7K3	Puromycin-sensitive aminopeptidase	Npepps
0.216231	0.145367	0.837533	P27773;F6Q404	Protein disulfide-isomerase A3	Pdia3
0.216227	0.00855481	2.06779	Q9D024;Q9D024-2;F7C265;Q9D024-3;B1AR93	Coiled-coil domain-containing protein 47	Ccdc47
0.216224	0.366325	0.436133	Q9D8U8	Sorting nexin-5	Snx5
0.215356	0.442191	0.35439	G5E829;Q8C048;A2ALL9;Q0VF55		Atp2b1
0.215093	0.114039	0.942945	Q80TI0-4;Q80TI0-3;Q80TI0;D3YWR0;Q80TI0-2;F7BFL8	GRAM domain-containing protein 1B	Gramd1b
0.214341	0.225793	0.646289	P32233;F7BQ65	Developmentally-regulated GTP-binding protein 1	Drg1
0.213836	0.477429	0.321092	Q9DCU6	39S ribosomal protein L4, mitochondrial	Mrpl4
0.21352	0.332376	0.47837	Q8BR63	Protein FAM177A1	Fam177a1
0.213386	0.349986	0.455949	Q5SS80;B0QZT2;Q5SS80-2;Q5SS84	Dehydrogenase/reductase SDR family member 13	Dhrs13
0.213094	0.487005	0.312467	P80316;E0CZA1	T-complex protein 1 subunit epsilon	Cct5
0.212458	0.264806	0.577072	Q9WUE3	Cytochrome b561 domain-containing protein 2	Cyb561d2
0.21217	0.148454	0.828407	Q99KU0;Q5SXR2	Vacuole membrane protein 1	Vmp1
0.212108	0.209004	0.679846	O08807;B1AZS9	Peroxiredoxin-4	Prdx4
0.212042	0.254239	0.594758	Q9EPK6	Nucleotide exchange factor SIL1	Sil1
0.211951	0.54067	0.267068	P47955;E9Q3T0	60S acidic ribosomal protein P1	Rplp1
0.211765	0.371929	0.429539	A2ATI9;Q99JX3;A2ATI8;A2ATI6;Q99JX3-2	Golgi reassembly-stacking protein 2	Gorasp2
0.21088	0.358605	0.445384	Q99P88	Nuclear pore complex protein Nup155	Nup155
0.210232	0.336948	0.472437	Q6P6J9	Thioredoxin domain-containing protein 15	Txndc15
0.209937	0.0978532	1.00942	Q9DB05;P28663	Alpha-soluble NSF attachment protein	Napa
0.209007	0.0721354	1.14185	B9EJ86;G3X9N6;Q9ER64;G5E833	Oxysterol-binding protein	Osbpl8
0.208684	0.395791	0.402534	Q8K2C9	Very-long-chain (3R)-3-hydroxyacyl-[acyl-carrier protein] dehydratase 3	ptplad1
0.208659	0.0137877	1.86051	Q6P1H6;Q6P1H6-2;Q6P1H6-3;Q6P1H6-4	Ankyrin repeat and LEM domain-containing protein 2	Ankle2
0.208043	0.231907	0.634686	P98192;Q05DV2	Dihydroxyacetone phosphate acyltransferase	Gnpat
0.206972	0.195326	0.709241	Q8VDD5;E9QPE7;F2Z494;O08638-2;O08638;Q8BXF2;Q91Z83;P13542;Q5SX39;Q5SX40	Myosin-9	Myh9
0.20675	0.431274	0.365247	P26516	26S proteasome non-ATPase regulatory subunit 7	Psmd7
0.206682	0.459815	0.337417	Q91V12-2;Q91V12-3;Q91V12-4;Q91V12;E9PYH2	Cytosolic acyl coenzyme A thioester hydrolase	Acot7
0.206454	0.0983009	1.00744	Q5RKZ7;Q5RKZ7-2;G3UYX9;Q5RKZ7-3;G3UWH1;G3UZD4	Molybdenum cofactor biosynthesis protein 1;Cyclic pyranopterin monophosphate synthase;Cyclic pyranopterin monophosphate synthase accessory protein	Mocs1
0.205486	0.0298807	1.52461	Q8BMK4	Cytoskeleton-associated protein 4	Ckap4
0.205215	0.00874415	2.05828	Q91XD7	Cysteine-rich with EGF-like domain protein 1	Creld1
0.205146	0.429233	0.367307	Q9JI99	Sphingosine-1-phosphate phosphatase 1	Sgpp1
0.204676	0.433746	0.362765	E9PVC6;E9Q9E1;Q6NZJ6;Q6NZJ6-2;E9PVC5;E9Q770;D3Z439;D3YWY7;D3YWM1	Eukaryotic translation initiation factor 4 gamma 1	Eif4g1
0.204572	0.501909	0.299375	E9PW69;Q9R1P0;E9Q0X0	Proteasome subunit alpha type;Proteasome subunit alpha type-4	Psma4
0.204362	0.65699	0.182441	P68372;Q9D6F9;J3QNR5;A2AQ07;CON__ENSEMBL:ENSBTAP00000025008;G3UZR1	Tubulin beta-4B chain;Tubulin beta-4A chain	Tubb4b;Tubb4a;Tubb4b-ps1
0.20395	0.0471285	1.32672	P70295;Q3U3K9	Ancient ubiquitous protein 1	Aup1
0.203567	0.150477	0.82253	P58158	Galactosylgalactosylxylosylprotein 3-beta-glucuronosyltransferase 3	B3gat3
0.201468	0.238252	0.622964	E9Q3Q6;Q61490;E9Q4G8;F6QH25;Q5MPX5	CD166 antigen	Alcam
0.200741	0.248082	0.605405	Q9CYV5;Q8C8G3	Transmembrane protein 135	Tmem135
0.20067	0.327799	0.484392	Q64324;F8WGM5	Syntaxin-binding protein 2	Stxbp2
0.200523	0.432874	0.363638	Q9R0M8;A2AER4;A2AER3	UDP-galactose translocator	Slc35a2
0.200206	0.42424	0.372388	P57787;B1ATM2;B1ATM1	Monocarboxylate transporter 4	Slc16a3
0.199618	0.0916615	1.03781	Q3ULJ0-2;Q3ULJ0;D3Z0L6	Glycerol-3-phosphate dehydrogenase 1-like protein	Gpd1l
0.198249	0.197008	0.705517	Q6PB93;Q6PB93-2	Polypeptide N-acetylgalactosaminyltransferase 2;Polypeptide N-acetylgalactosaminyltransferase 2 soluble form	Galnt2
0.197939	0.503255	0.298212	P61161	Actin-related protein 2	Actr2
0.197804	0.521587	0.282673	Q99NB1	Acetyl-coenzyme A synthetase 2-like, mitochondrial	Acss1
0.197366	0.665947	0.17656	Q7TQE6	Macoilin	Tmem57
0.197204	0.613166	0.212422	P70460	Vasodilator-stimulated phosphoprotein	Vasp
0.19671	0.318353	0.497091	Q91V01;D6RGA3	Lysophospholipid acyltransferase 5	Lpcat3
0.196635	0.321022	0.493466	O55106;F8WH41;F6Z700	Striatin	Strn
0.196059	0.357331	0.44693	B1ATV0;Q9WVD4;B1ATV1	H(+)/Cl(-) exchange transporter 5	Clcn5
0.195648	0.0195438	1.70899	Q9R099;D3YZH8;F8WI46	Transducin beta-like protein 2	Tbl2
0.195451	0.0961139	1.01721	Q9R0X4;Q32MW3	Acyl-coenzyme A thioesterase 9, mitochondrial;Acyl-coenzyme A thioesterase 10, mitochondrial	Acot9;Acot10
0.195174	0.184809	0.733277	Q99K23	Ufm1-specific protease 2	Ufsp2
0.194949	0.217595	0.662351	P51174	Long-chain specific acyl-CoA dehydrogenase, mitochondrial	Acadl
0.193228	0.276654	0.558063	Q9R1P4	Proteasome subunit alpha type-1	Psma1
0.192022	0.371749	0.42975	P70206;P70208-2;P70208;Q80UG2;P70207	Plexin-A1	Plxna1
0.191745	0.149532	0.825266	Q9JIS8;F8WIJ0;F6TQE2	Solute carrier family 12 member 4	Slc12a4
0.190939	0.442677	0.353913	Q61187;D3Z0S9;D3Z2V5	Tumor susceptibility gene 101 protein	Tsg101
0.190835	0.42504	0.37157	Q8R2U0-2;Q8R2U0	Nucleoporin SEH1	Seh1l
0.19077	0.432408	0.364106	P70290;B7ZCL8;A2AN84;B7ZCL9;B7ZCM0;B7ZCM1;D6RFD5	55 kDa erythrocyte membrane protein	Mpp1
0.190277	0.326717	0.485828	Q8BJT9		Edem2
0.189884	0.158989	0.798633	P63168;Q80ZS7	Dynein light chain 1, cytoplasmic	Dynll1;BC048507
0.189801	0.473934	0.324282	Q9WUA2	Phenylalanine--tRNA ligase beta subunit	Farsb
0.18977	0.0195375	1.70913	P47740;B1AV77;B1ATI0	Fatty aldehyde dehydrogenase	Aldh3a2
0.188913	0.691704	0.16008	P17095	High mobility group protein HMG-I/HMG-Y	Hmga1
0.188909	0.432793	0.36372	Q9WU79;F6YFQ5;F6PYI8;E9PUR5	Proline dehydrogenase 1, mitochondrial	Prodh
0.187265	0.191523	0.717779	Q9CR26;F6W5Q8	Vacuolar protein sorting-associated protein VTA1 homolog	Vta1
0.186397	0.543335	0.264932	Q925U4	ER degradation-enhancing alpha-mannosidase-like protein 1	Edem1
0.186354	0.553977	0.256508	Q9Z2E1;Q9Z2E1-2	Methyl-CpG-binding domain protein 2	Mbd2
0.18589	0.557414	0.253822	P53986	Monocarboxylate transporter 1	Slc16a1
0.18473	0.480981	0.317872	P14234	Tyrosine-protein kinase Fgr	Fgr
0.184474	0.383248	0.41652	Q3TQB2;Q3TQB2-2;F6UAF9;D6RG85;D3Z5V7	FAD-dependent oxidoreductase domain-containing protein 1	Foxred1
0.183745	0.431423	0.365096	Q9JM76;H7BWZ3;D3Z2F7;D3Z2F8	Actin-related protein 2/3 complex subunit 3	Arpc3
0.182753	0.40532	0.392202	P58242	Acid sphingomyelinase-like phosphodiesterase 3b	Smpdl3b
0.182601	0.550318	0.259386	Q8C052	Microtubule-associated protein 1S;MAP1S heavy chain;MAP1S light chain	Map1s
0.182086	0.182361	0.739067	G3XA21;E0CZ22;D3Z624;F6UUF6;E9PYI5		Mroh1
0.182005	0.223182	0.651342	Q9CQE7;Q9CQE7-2;F6UIS1;F6RK81	Endoplasmic reticulum-Golgi intermediate compartment protein 3	Ergic3
0.181769	0.575796	0.239731	Q05BE7;Q9QZS3-4;Q9QZS3-2;Q9QZS3-3;Q9QZS3;D3Z549;D3Z7I6;D3Z1E8;D3Z7J1;F8WJ71	Protein numb homolog	Numb
0.1817	0.430582	0.365945	Q8BH04;Q9Z2V4	Phosphoenolpyruvate carboxykinase [GTP], mitochondrial	Pck2
0.181413	0.238471	0.622565	P61982	14-3-3 protein gamma;14-3-3 protein gamma, N-terminally processed	Ywhag
0.181252	0.0454181	1.34277	Q8BHC4;B0QZX9	Dephospho-CoA kinase domain-containing protein	Dcakd
0.180884	0.0772199	1.11227	Q99P31	Hsp70-binding protein 1	Hspbp1
0.180715	0.472486	0.325611	Q8CBW3-2;B7ZCU4;B7ZCU3;Q8CBW3-4;Q8CBW3-3;B7ZCU0;Q8CBW3;J3QNK8;Q8CBW3-5;B7ZCU2;B7ZCU5;P62484	Abl interactor 1	Abi1
0.179993	0.416564	0.380318	Q6P9J9	Anoctamin-6	Ano6
0.178973	0.422135	0.374549	Q8BVA5;Q8BVA5-2;Q8BVA5-3;Q8BVA5-4	UPF0554 protein C2orf43 homolog
0.178793	0.233216	0.632242	F6YX19;Q99LV7;F7DFD7;Q99LV7-2;F6RUP6	Phosphatidylinositol-glycan biosynthesis class X protein	Pigx
0.178437	0.110762	0.955611	P08752;B2RSH2	Guanine nucleotide-binding protein G(i) subunit alpha-2	Gnai2
0.177841	0.269152	0.570002	Q921E2;Q3TXV4;D6RFT6	Ras-related protein Rab-31	Rab31
0.176993	0.387191	0.412075	Q9QUH0	Glutaredoxin-1	Glrx
0.176811	0.477893	0.320669	P14438;P14434;G3UWR9;P14437;P14436;P14435;P23150;P04228;P01910;P04227	H-2 class II histocompatibility antigen, A-U alpha chain;H-2 class II histocompatibility antigen, A-B alpha chain;H-2 class II histocompatibility antigen, A-S alpha chain;H-2 class II histocompatibility antigen, A-R alpha chain;H-2 class II histocompatibility antigen, A-F alpha chain;H-2 class II histocompatibility antigen, I-E alpha chain;H-2 class II histocompatibility antigen, A-D alpha chain;…	H2-Aa
0.175067	0.0879057	1.05598	Q8C2Q8;Q91VR2;A2AKU9;A2AKV2;A2AKV3;A2AKV1;A2AKV0	ATP synthase subunit gamma;ATP synthase subunit gamma, mitochondrial	Atp5c1
0.174978	0.198105	0.703105	P35979;F8VQK7;D3YX33	60S ribosomal protein L12	Rpl12
0.174923	0.239514	0.62067	Q9Z2U0;Q9CWH6	Proteasome subunit alpha type-7;Proteasome subunit alpha type-7-like	Psma7;Psma8
0.173861	0.186527	0.729258	I7HLV2;Q6ZWV3;P86048;B7FAU6	60S ribosomal protein L10;60S ribosomal protein L10-like	Rpl10;Rpl10l
0.17265	0.0893635	1.04884	Q9D6Y7-2;Q9D6Y7;Q9D6Y7-4;Q9D6Y7-3	Mitochondrial peptide methionine sulfoxide reductase	Msra
0.172367	0.0205051	1.68814	P63017;Q504P4;D3Z5E2;D3YW43	Heat shock cognate 71 kDa protein	Hspa8
0.172082	0.529997	0.275726	D3YWT0;Q9R0P6;D3Z569;D3YTS1	Signal peptidase complex catalytic subunit SEC11A	Sec11a
0.171983	0.374708	0.426307	Q99K51;B1AX58	Plastin-3	Pls3
0.17193	0.441557	0.355013	O89016	ATP-binding cassette sub-family D member 4	Abcd4
0.171313	0.293166	0.532886	Q3UN02;B0V2Q9	Lysocardiolipin acyltransferase 1	Lclat1
0.170966	0.523405	0.281162	Q5IRJ6;Q5IRJ6-2;F8WHL1	Zinc transporter 9	Slc30a9
0.170517	0.310749	0.50759	Q9CR27;G3UWG7	WASH complex subunit CCDC53	Ccdc53
0.170152	0.299553	0.523527	Q8BYM8;G3X975	Probable cysteine--tRNA ligase, mitochondrial	Cars2
0.168865	0.355415	0.449264	E9Q405;Q9JMH9-5;Q9JMH9-7;Q9JMH9-2;Q9JMH9-1;K3W4L0;B2RRE2;Q9JMH9;Q9JMH9-6;E9QAX2;Q9JMH9-4;E9QA74	Unconventional myosin-XVIIIa	Myo18a
0.168629	0.0788064	1.10344	Q69ZN6-2;Q69ZN6;D3YXC6;D3Z1C3	N-acetylglucosamine-1-phosphotransferase subunits alpha/beta;N-acetylglucosamine-1-phosphotransferase subunit alpha;N-acetylglucosamine-1-phosphotransferase subunit beta	Gnptab
0.168363	0.62339	0.20524	Q99KH8	Serine/threonine-protein kinase 24;Serine/threonine-protein kinase 24 35 kDa subunit;Serine/threonine-protein kinase 24 12 kDa subunit	Stk24
0.168316	0.331694	0.479263	Q8BMS4	Hexaprenyldihydroxybenzoate methyltransferase, mitochondrial	Coq3
0.168156	0.305658	0.514764	Q9JJF9;F6RJQ8	Signal peptide peptidase-like 2A	Sppl2a
0.166886	0.211499	0.674692	Q9CZX9	ER membrane protein complex subunit 4	Emc4
0.166851	0.128541	0.890957	Q8VDL4-3;Q8VDL4;Q8VDL4-2	ADP-dependent glucokinase	Adpgk
0.166056	0.427924	0.368633	Q6PIC6;Q8VCE0	Sodium/potassium-transporting ATPase subunit alpha-3	Atp1a3
0.165852	0.515956	0.287387	Q9R1Q9;Q3TKX1;B7FAU3;B7FAU7;F6ZE56;F6X9J0	V-type proton ATPase subunit S1	Atp6ap1
0.165807	0.42648	0.370101	P60867	40S ribosomal protein S20	Rps20
0.165746	0.360316	0.443317	Q99LC5	Electron transfer flavoprotein subunit alpha, mitochondrial	Etfa
0.165662	0.70727	0.150415	A2CF65;P49300;F8WHB7;J3QPR7;B1AU01;A2CF63;B1AU03;Q8JZN1;F6QSC4;A9XX86	C-type lectin domain family 10 member A	Clec10a
0.165283	0.595408	0.225185	P62274;D3YYL7	40S ribosomal protein S29	Rps29;Gm10126
0.164925	0.665924	0.176575	Q8BFU4;Q9CX84;B7ZCT1;B7ZCT0;F6WK59	Regulator of G-protein signaling 19	Rgs19
0.164864	0.586362	0.231834	H3BK73;Q8R1J9;Q8R1J9-2;P0C7W3	Torsin-2A;Prosalusin;Salusin-beta	Tor2a
0.164264	0.475156	0.323163	Q8CAK1;B2FDE8	Putative transferase CAF17 homolog, mitochondrial	Iba57
0.164032	0.758432	0.120084	Q62432-2;Q62432;A2CG44;Q8BUN5;Q9JIW5;E9Q3M0;A2CG45;F7BUP2;E9Q5P9;Q8C3Y6;P97454;P70340	Mothers against decapentaplegic homolog 2;Mothers against decapentaplegic homolog 3;Mothers against decapentaplegic homolog 9	Smad2;Smad3;Smad9
0.163765	0.392195	0.406498	B2RWE3;B1AR13	CDGSH iron-sulfur domain-containing protein 3, mitochondrial	Cisd3
0.163537	0.651028	0.1864	Q3ULB1;Q921W7;P47226-2		Tes
0.163234	0.188973	0.7236	Q8BWF0	Succinate-semialdehyde dehydrogenase, mitochondrial	Aldh5a1
0.163176	0.419268	0.377508	Q8BH95;F6T930	Enoyl-CoA hydratase, mitochondrial	Echs1
0.162942	0.344092	0.463325	Q8BWY7-3;Q8BWY7;Q8BWY7-2;B1ARC2;B1ARC5	Zinc transporter ZIP11	Slc39a11
0.162535	0.348155	0.458227	Q9ESX5;F6YUI5;B7ZCL7;A2AN81	H/ACA ribonucleoprotein complex subunit 4	Dkc1
0.162018	0.161452	0.791956	Q9WTX5;E9PUV4	S-phase kinase-associated protein 1	Skp1
0.16193	0.551983	0.258075	Q9D4H1	Exocyst complex component 2	Exoc2
0.161761	0.290171	0.537346	Q9CWP6;B1AU74;Q9CWP6-2;Q9CWP6-3;Q9CWP6-4	Motile sperm domain-containing protein 2	Mospd2
0.16139	0.304664	0.516178	D3YWQ8;P23298;P16054	Protein kinase C eta type	Prkch
0.159966	0.294448	0.530991	Q9CQ92;G3X9U9;D3YZ32	Mitochondrial fission 1 protein	Fis1
0.159847	0.0563433	1.24916	Q3V3R1	Monofunctional C1-tetrahydrofolate synthase, mitochondrial	Mthfd1l
0.159783	0.25399	0.595184	Q78HU3	Multivesicular body subunit 12A	Mvb12a
0.159348	0.203406	0.691636	Q9D0K2;Q3UJQ9	Succinyl-CoA:3-ketoacid coenzyme A transferase 1, mitochondrial;Succinyl-CoA:3-ketoacid-coenzyme A transferase	Oxct1
0.159018	0.146494	0.834181	Q8BP92;D6RHL9	Reticulocalbin-2	Rcn2
0.158533	0.164634	0.783482	Q9JIK9	28S ribosomal protein S34, mitochondrial	Mrps34
0.158108	0.253051	0.596792	Q8BJ03-2;Q8BJ03	Cytochrome c oxidase assembly protein COX15 homolog	Cox15
0.157951	0.331706	0.479247	P10833;P62071	Ras-related protein R-Ras	Rras
0.157632	0.311	0.50724	Q9ERI6	Retinol dehydrogenase 14	Rdh14
0.156662	0.444695	0.351938	Q8BS95	Golgi pH regulator	Gpr89a
0.156382	0.276803	0.55783	Q8BXN9;Q8BXN9-2;A2AQJ5;A2AQJ6;A2AQJ7;Q8BXN9-3	Transmembrane protein 87A	Tmem87a
0.156278	0.438214	0.358314	Q8C163;E9PZS5	Nuclease EXOG, mitochondrial	Exog
0.154704	0.243042	0.614318	Q6NVE9;Q6NVE9-2	Protein phosphatase PTC7 homolog	Pptc7
0.153837	0.281879	0.549938	Q8C253;P16110	Galectin-3	Lgals3
0.153483	0.365806	0.436749	Q9WUR9;A2ARF6;F6TEU8	GTP:AMP phosphotransferase AK4, mitochondrial	Ak4
0.153371	0.21598	0.665587	O35083;G3UWV6	1-acyl-sn-glycerol-3-phosphate acyltransferase alpha	Agpat1
0.153157	0.5101	0.292345	Q3UDP0;E9QK95;Q3UDP0-2;B2RQV3	WD repeat-containing protein 41	Wdr41
0.152003	0.459158	0.338038	Q9CQF9;F7CIP8;D3Z275	Prenylcysteine oxidase	Pcyox1
0.151721	0.677504	0.169088	Q3TRM4-2;Q3TRM4-3;Q3TRM4;Q3TRM4-4	Neuropathy target esterase	Pnpla6
0.151627	0.479566	0.319152	B0R091;P61022;B0R092	Calcineurin B homologous protein 1	Chp1
0.150685	0.171026	0.766939	E9Q035;P47758;Q921I1;F7BAE9	Signal recognition particle receptor subunit beta	Gm20425;Srprb
0.150578	0.699919	0.154952	P15379-2;Q3U8S1;A2APM5;P15379-3;A2APM3;P15379-6;A2APM4;P15379-11;P15379-5;E9QKM8;Q80X37;P15379-10;P15379-9;P15379-4;A2APM1;P15379-8;P15379-7;P15379;A2APM2;P15379-12;P15379-13	CD44 antigen	Cd44
0.150418	0.277582	0.556609	Q9CZL5	Pterin-4-alpha-carbinolamine dehydratase 2	Pcbd2
0.150382	0.520489	0.283589	Q62376;Q62376-2	U1 small nuclear ribonucleoprotein 70 kDa	Snrnp70
0.150371	0.589869	0.229244	P49282-2;P49282-3
0.149556	0.459761	0.337468	E9QMX7;Q640N3-2;Q640N3	Rho GTPase-activating protein 30	Arhgap30
0.149418	0.219347	0.658868	Q9ESP1	Stromal cell-derived factor 2-like protein 1	Sdf2l1
0.149271	0.533526	0.272845	Q8VE70;F8WI55;E0CY82	Programmed cell death protein 10	Pdcd10
0.149015	0.186313	0.729756	Q8BHF7;F8WI04;F2Z427	CDP-diacylglycerol--glycerol-3-phosphate 3-phosphatidyltransferase, mitochondrial	Pgs1
0.148211	0.373874	0.427275	Q9ET30	Transmembrane 9 superfamily member 3	Tm9sf3
0.14793	0.459434	0.337777	Q923K4;E9PWV7;D6RDC6;Q923K4-2	tRNA modification GTPase GTPBP3, mitochondrial	Gtpbp3
0.147687	0.500208	0.30085	E9Q411		Nbas
0.14705	0.613114	0.212459	P80314	T-complex protein 1 subunit beta	Cct2
0.146986	0.650173	0.186971	Q9JLB0-2;Q9JLB0;E9PWC5	MAGUK p55 subfamily member 6	Mpp6
0.146771	0.689058	0.161744	O89079;D3Z315;F6YFR7;E9Q6I5;F6XIG5	Coatomer subunit epsilon	Cope
0.14606	0.642164	0.192354	Q9WTI7-2;Q9WTI7-3;Q9WTI7;Q9WTI7-4	Unconventional myosin-Ic	Myo1c
0.145762	0.590656	0.228666	Q8C0L0;A2ARI0;A2ARI1	Thioredoxin-related transmembrane protein 4	Tmx4
0.145653	0.504547	0.297098	D3YWR7;Q8BVI4;D3Z099;D3Z1A1	Dihydropteridine reductase	Qdpr
0.145546	0.263764	0.578785	Q9ERR7;D3Z3Y8	15 kDa selenoprotein	42248
0.145112	0.403587	0.394063	F7AWQ5;Q3TQR0-2;Q3TQR0-3;Q3TQR0;D3YUX4;D3Z1F0;D3Z1R5;D3YZS6;D3YYE3	Post-GPI attachment to proteins factor 2	Pgap2
0.145001	0.537172	0.269887	P14576;E9PXC0;P14576-2	Signal recognition particle 54 kDa protein	Srp54;Srp54c
0.144987	0.477109	0.321382	O35623	BET1 homolog	Bet1
0.144461	0.45524	0.34176	D3Z456;Q99N95;F6W7C7	39S ribosomal protein L3, mitochondrial	Mrpl3
0.143875	0.378403	0.422046	Q9D6J6;Q9D6J6-2;M0QWP9;D6RGN4	NADH dehydrogenase [ubiquinone] flavoprotein 2, mitochondrial	Ndufv2
0.143073	0.424074	0.372558	P51175	Protoporphyrinogen oxidase	Ppox
0.142926	0.238948	0.621696	Q6ZQI3;D3Z1M3	Malectin	Mlec
0.142631	0.511199	0.29141	Q9Z127	Large neutral amino acids transporter small subunit 1	Slc7a5
0.14234	0.433405	0.363107	H3BKD4;H3BKE6;Q9QWY8-2;E9QMI7;E9QMJ1;H3BL41;Q9QWY8-4;Q9QWY8-3;H3BJY2;Q9QWY8;E9QN63;H3BJM7	Arf-GAP with SH3 domain, ANK repeat and PH domain-containing protein 1	Asap1
0.1423	0.417441	0.379405	P63276	40S ribosomal protein S17	Rps17
0.142219	0.468049	0.329709	P97450;E9QAD6	ATP synthase-coupling factor 6, mitochondrial	Atp5j
0.142189	0.250506	0.601182	Q8K1X1;G5E8J3	WD repeat-containing protein 11	Wdr11
0.142162	0.166028	0.779818	P19783;M0QWX7;D6RG40	Cytochrome c oxidase subunit 4 isoform 1, mitochondrial	Cox4i1
0.142107	0.086446	1.06326	Q8BRH0;G5E8C4;Q8BRH0-2;D3Z2Z3	Transmembrane and TPR repeat-containing protein 3	Tmtc3
0.142039	0.163969	0.785238	Q9R0E2;F6WNR1;A8Y5E6	Procollagen-lysine,2-oxoglutarate 5-dioxygenase 1	Plod1
0.141926	0.371099	0.43051	P52875;D3YV67	Transmembrane protein 165	Tmem165
0.141743	0.535921	0.270899	Q9JKW0	ADP-ribosylation factor-like protein 6-interacting protein 1	Arl6ip1
0.141656	0.304115	0.516962	Q60759;D3Z4I2	Glutaryl-CoA dehydrogenase, mitochondrial	Gcdh
0.140098	0.771956	0.112408	Q8K1I7	WAS/WASL-interacting protein family member 1	Wipf1
0.140092	0.319001	0.496208	Q9CY73;Q9CY73-2	39S ribosomal protein L44, mitochondrial	Mrpl44
0.139785	0.193276	0.713821	O08795-2;O08795	Glucosidase 2 subunit beta	Prkcsh
0.139109	0.360066	0.443618	Q8VDP3-3;Q8VDP3;E9PUI4;Q8VDP3-2	Protein-methionine sulfoxide oxidase MICAL1	Mical1
0.138566	0.434065	0.362445	P08113;F7C312	Endoplasmin	Hsp90b1
0.137932	0.161938	0.79065	P59481;D3Z4P2;F6QN75;J3QNZ7	VIP36-like protein	Lman2l
0.136907	0.536483	0.270444	Q99N85;Q5U5I3;D3Z603	28S ribosomal protein S18a, mitochondrial	Mrps18a
0.136666	0.301809	0.520268	A2AJ88-2;A2AJ88;F6UDU9;B0R010;B0R009;B0R011	Patatin-like phospholipase domain-containing protein 7	Pnpla7
0.136549	0.541436	0.266453	P98078;P98078-2;E9QL31;F6TQN9;E9PX84;Q3TRE6;P98078-3;Q9DCE6;E0CXT5;E0CZ53;E0CYJ2	Disabled homolog 2	Dab2
0.136063	0.578849	0.237435	O09005;F6S3U4	Sphingolipid delta(4)-desaturase DES1	Degs1
0.135679	0.553103	0.257194	Q8BJM5;J3QMX8	Zinc transporter 6	Slc30a6
0.135261	0.608845	0.215494	Q6P9Q4	FH1/FH2 domain-containing protein 1	Fhod1
0.135009	0.276206	0.558767	O08547;E9Q6R3;D6RES2	Vesicle-trafficking protein SEC22b	Sec22b
0.13499	0.713812	0.146416	A2AJI1;A2AJI0-2;A8Y5P4;A2AJI0;F6WF36	MAP7 domain-containing protein 1	Map7d1
0.134963	0.53211	0.273999	Q9JKC8;H7BWY2;D3YXV9;D6RI63;D3YWU3;Q8R2R9	AP-3 complex subunit mu-1	Ap3m1
0.134797	0.290905	0.536249	Q78IK4;B1AV14	Apolipoprotein O-like	Apool
0.134403	0.555813	0.255071	P55772;D6RHQ2;Q8CDV7;D6RFA9;F7B9M9	Ectonucleoside triphosphate diphosphohydrolase 1	Entpd1
0.134402	0.589345	0.229631	Q3THE2;Q9CQ19;D3YV37;D3Z249	Myosin regulatory light chain 12B	Myl12b
0.134257	0.469817	0.328071	Q9Z329;Q9Z329-3;Q9Z329-2;B2KF92;B2KF89	Inositol 1,4,5-trisphosphate receptor type 2	Itpr2
0.134164	0.525149	0.279717	Q8BRQ9;Q925N0	Sideroflexin-5	Sfxn5
0.134093	0.619813	0.207739	Q8BHI7;D3Z0Z6;D3Z136	Elongation of very long chain fatty acids protein 5	Elovl5
0.133882	0.474661	0.323617	Q8VCW4;E9PYK0;E9Q8P6;Q8VCW4-2	Protein unc-93 homolog B1	Unc93b1
0.133787	0.656323	0.182882	Q58A65-5;Q58A65-2;Q58A65;Q58A65-6;Q58A65-3;F8WH31;E9PUD1;Q58A65-4;F6SH61;F6WNT4;E9Q6B6;Q9ESN9-2;E9Q6E0;Q9ESN9-3;Q9ESN9-5;Q9ESN9-4;Q9ESN9;J3QNR6;Q9ESN9-6;K3W4S4	C-Jun-amino-terminal kinase-interacting protein 4	Spag9
0.133733	0.55253	0.257644	P05977-2;E9PWG4;P05977;P09542	Myosin light chain 1/3, skeletal muscle isoform;Myosin light chain 3	Myl1;Myl3
0.133434	0.490114	0.309703	Q9JJQ0	GPI mannosyltransferase 3	Pigb
0.133295	0.342114	0.46583	Q8BWT1	3-ketoacyl-CoA thiolase, mitochondrial	Acaa2
0.132698	0.479422	0.319282	E9PUF7;Q61210-5;Q61210-2;Q61210;Q61210-4;Q61210-3;F6ZN61	Rho guanine nucleotide exchange factor 1	Arhgef1
0.132683	0.371393	0.430166	Q91YY4;H3BLF0	ATP synthase mitochondrial F1 complex assembly factor 2	Atpaf2
0.132034	0.523678	0.280936	Q9DBN5;Q9DBN5-2;Q9DBN5-3;Q8BK80	Lon protease homolog 2, peroxisomal	Lonp2
0.131868	0.405987	0.391488	Q9WTS2	Alpha-(1,6)-fucosyltransferase	Fut8
0.13154	0.311895	0.505991	Q99LB2	Dehydrogenase/reductase SDR family member 4	Dhrs4
0.13055	0.562855	0.249603	Q69ZN7	Myoferlin	Myof
0.129724	0.725864	0.139145	O09044;Q9D3L3;B0R030;B0R029;E9Q8A1;P60879	Synaptosomal-associated protein 23;Synaptosomal-associated protein	Snap23
0.128898	0.23123	0.635956	Q9DC16;F6SLP4;F6Z6A5	Endoplasmic reticulum-Golgi intermediate compartment protein 1	Ergic1
0.128584	0.324572	0.488688	P37040;Q05DV1;E9Q997;E9PVT9;F6R7H8	NADPH--cytochrome P450 reductase	Por
0.12856	0.125594	0.901032	O55143;O55143-2;J3KMM5	Sarcoplasmic/endoplasmic reticulum calcium ATPase 2	Atp2a2
0.128074	0.18233	0.739141	Q9CXW4;E9PYL9;D3Z3K1;A2BH06;E9PZB3;D3YW69	60S ribosomal protein L11	Rpl11;Gm10036;Gm10288;Gm5093;Gm7589
0.127074	0.440236	0.356315	Q8K0Z7	Translational activator of cytochrome c oxidase 1	Taco1
0.126952	0.446733	0.349952	Q6ZWN5;F7CJS8;D3YWH9;Q9CXW7;D3Z673;D3YUV6	40S ribosomal protein S9	Rps9
0.126889	0.553162	0.257147	G3X9V2;P30999;E9Q8Z6;E9Q8Z8;E9Q986;D3Z7H6;E9Q907;E9Q905;E9Q8Z4;E9Q8Z9;D3Z2H2;E9Q901;P30999-2;E9Q904;P30999-3;E9Q8Z5;E9Q906;E9Q903;D3Z2H7	Catenin delta-1	Ctnnd1
0.126283	0.538469	0.268839	B1ATZ0;B1ATZ1;Q99LI8;Q3UMA3;B1ATY9	Hepatocyte growth factor-regulated tyrosine kinase substrate	Hgs
0.126183	0.536759	0.270221	Q6GT24;O08709;D3Z0Y2	Peroxiredoxin-6	Prdx6
0.125753	0.441074	0.355488	Q6P549	Phosphatidylinositol 3,4,5-trisphosphate 5-phosphatase 2	Inppl1
0.125399	0.518632	0.285141	P39061-2;P39061-1;P39061;E9QPX1;D3Z556;D3Z5C2	Collagen alpha-1(XVIII) chain;Endostatin	Col18a1
0.125216	0.399441	0.398547	Q91VE0	Long-chain fatty acid transport protein 4	Slc27a4
0.124039	0.340811	0.467486	Q9D6J5;Q3V406;F6VCY0;E9Q9J5	NADH dehydrogenase [ubiquinone] 1 beta subcomplex subunit 8, mitochondrial	Ndufb8
0.123262	0.493918	0.306345	Q9EP72	ER membrane protein complex subunit 7	Emc7
0.123223	0.267367	0.572892	P36423;F6SG79;Q3TRY5	Thromboxane-A synthase	Tbxas1
0.123158	0.425451	0.371151	Q3U9G9	Lamin-B receptor	Lbr
0.122761	0.397289	0.400893	E9PX48;Q8R1A4-2;A2A9M5;Q8R1A4;A2A9M4;A2AW79;F6ZJ55	Dedicator of cytokinesis protein 7	Dock7
0.122133	0.210028	0.677723	Q8C7X2-2;Q8C7X2;Q8C7X2-3	ER membrane protein complex subunit 1	Emc1
0.121963	0.285886	0.543807	Q922Q1;F6UB20;F7DFG6;E0CZH6;Q9CW42;D3YZZ3	MOSC domain-containing protein 2, mitochondrial	37316
0.121318	0.329126	0.482638	Q9CXI0;F6X4L9	2-methoxy-6-polyprenyl-1,4-benzoquinol methylase, mitochondrial	Coq5
0.121227	0.19796	0.703422	Q01853	Transitional endoplasmic reticulum ATPase	Vcp
0.12098	0.374126	0.426982	E9QPQ8;Q8JZS9	39S ribosomal protein L48, mitochondrial	Mrpl48
0.120888	0.329911	0.481603	Q9D1K2;F7B2B4	V-type proton ATPase subunit F	Atp6v1f
0.120823	0.537675	0.26948	G5E8J9;Q8CFE4;Q80UY7;Q8CFE4-2	SCY1-like protein 2	Scyl2
0.12034	0.480196	0.318581	Q91YJ5;Q5M6W7;F6RR02;Q5M6W8	Translation initiation factor IF-2, mitochondrial	Mtif2
0.120053	0.412949	0.384103	P70704;F6WYQ5;Q8BR88;Q3U9N5;E9Q4J5;F6Q8P7;P98200	Probable phospholipid-transporting ATPase IA	Atp8a1
0.119779	0.541565	0.266349	Q91YZ5;P55098	Peroxisome biogenesis factor 2	Pex2
0.119643	0.522813	0.281654	P62900	60S ribosomal protein L31	Rpl31
0.119101	0.47177	0.326269	F6SVV1;P62082;J3QJZ3	40S ribosomal protein S7	Gm9493;Rps7;Gm6472
0.119009	0.501664	0.299587	Q566J8;E9QLB8	Uncharacterized aarF domain-containing protein kinase 4	Adck4
0.118877	0.647833	0.188537	Q80UJ7	Rab3 GTPase-activating protein catalytic subunit	Rab3gap1
0.1186	0.614104	0.211758	Q8QZW8		Arhgap9
0.118406	0.160336	0.794969	Q9CYN2	Signal peptidase complex subunit 2	Spcs2
0.117901	0.246205	0.608703	H3BKH2;H3BK48;H3BJS0;H3BJI6;E9PY90;E9Q3S2;H3BL19;H3BK44;Q8R311;H3BKL6;H3BJ71;H3BJS5;H3BJ35;H3BJ84	cTAGE family member 5	Ctage5
0.117639	0.400039	0.397897	P62702;Q3V1Z5	40S ribosomal protein S4, X isoform	Rps4x;Rps4y2
0.116575	0.51292	0.28995	Q8CI78;F6QWS3	Required for meiotic nuclear division protein 1 homolog	Rmnd1
0.116524	0.557148	0.254029	Q3UMB5;Q3UMB5-2	Smith-Magenis syndrome chromosomal region candidate gene 8 protein homolog	Smcr8
0.116309	0.496765	0.303849	Q9CRA5	Golgi phosphoprotein 3	Golph3
0.116154	0.871576	0.0596949	E0CY07;Q9CR64-2;Q9CR64	Protein kish-A	Tmem167;Tmem167a
0.115973	0.426694	0.369884	P12787	Cytochrome c oxidase subunit 5A, mitochondrial	Cox5a
0.11575	0.622638	0.205764	Q922Q8	Leucine-rich repeat-containing protein 59	Lrrc59
0.115383	0.477243	0.321261	P62908;D3YV43	40S ribosomal protein S3	Rps3
0.114978	0.561233	0.250857	Q8K4X7;E9Q6S5;E9Q2T9	1-acyl-sn-glycerol-3-phosphate acyltransferase delta	Agpat4
0.114875	0.110849	0.955268	Q9DBH5	Vesicular integral-membrane protein VIP36	Lman2
0.114552	0.559178	0.25245	Q69ZP3-2;Q69ZP3;Q69ZP3-3
0.114199	0.568944	0.24493	P63213	Guanine nucleotide-binding protein G(I)/G(S)/G(O) subunit gamma-2	Gng2
0.113864	0.549115	0.260336	Q5BL07-2;Q5BL07;F6RUH9	Peroxisome biogenesis factor 1	Pex1
0.112986	0.480418	0.318381	Q80TL7-2;B9EKJ3;Q80TL7	Protein MON2 homolog	Mon2
0.112573	0.662023	0.179127	Q6P8H8	Probable dolichyl pyrophosphate Glc1Man9GlcNAc2 alpha-1,3-glucosyltransferase	Alg8
0.11256	0.415424	0.381509	E0CXB1;Q9QUM9	Proteasome subunit alpha type-6	Psma6
0.112212	0.192826	0.714835	Q6PAM1;Q6PAM1-2;A8Y5J8;A2ADZ3;A2ADZ4;A2ADZ2	Alpha-taxilin	Txlna
0.111149	0.554968	0.255732	Q9Z2G9;Q9Z2G9-2	Oxidoreductase HTATIP2	Htatip2
0.110361	0.621825	0.206332	Q8VH51-2;Q8VH51;Q8VH51-3;E9Q8F0;F7AA45;B7ZD61;B7ZD63;B7ZD64;E9PZF9;D6RCZ8;E9Q999;D6RJ85	RNA-binding protein 39	Rbm39
0.110282	0.409183	0.388083	Q8BXA5	Cleft lip and palate transmembrane protein 1-like protein	Clptm1l
0.109602	0.547969	0.261244	Q91XC9	Peroxisomal membrane protein PEX16	Pex16
0.108526	0.505623	0.296173	Q9CZ57;Q9CZ57-2	5-methylcytosine rRNA methyltransferase NSUN4	Nsun4
0.10817	0.553087	0.257207	Q8C7K6	Prenylcysteine oxidase-like	Pcyox1l
0.107841	0.363977	0.438926	Q5XG73-2;Q5XG73-3;Q5XG73;E9QNH7;E0CXU7;E9Q289	Acyl-CoA-binding domain-containing protein 5	Acbd5
0.107658	0.417491	0.379353	Q9Z0P5;Q9Z0P5-2	Twinfilin-2	Twf2
0.107538	0.671388	0.173026	Q3UHJ0-2;Q3UHJ0	AP2-associated protein kinase 1	Aak1
0.107531	0.57285	0.241959	Q8R2R6	Mitochondrial GTPase 1	Mtg1
0.107476	0.54741	0.261687	P14131	40S ribosomal protein S16	Rps16
0.107438	0.720099	0.142608	Q9WVL6;Q6P1H4	Exostosin-like 3	Extl3
0.10687	0.315223	0.501382	Q8K0D7	Tail-anchored protein insertion receptor WRB	Wrb
0.106685	0.489391	0.310344	Q91V04	Translocating chain-associated membrane protein 1	Tram1
0.106321	0.598599	0.222864	A2A815;A2A813;Q99LX0;A2A817;A2A816	Protein DJ-1	Park7
0.106163	0.498865	0.302017	D3YZN4;Q3ULF4;D3Z1Z1;D3YXB7;F6W695;D3Z342;G3UX97;F6VTG4	Paraplegin	Spg7
0.105655	0.340421	0.467984	Q91ZA3;H3BL62;D3YWM4;D3YZC0;H3BK61	Propionyl-CoA carboxylase alpha chain, mitochondrial	Pcca
0.105556	0.34915	0.456988	Q99J39-2;Q99J39	Malonyl-CoA decarboxylase, mitochondrial	Mlycd
0.105289	0.243057	0.614291	Q91YW3	DnaJ homolog subfamily C member 3	Dnajc3
0.105049	0.498993	0.301906	Q8BVA2;D6RIQ5;F6ZS99	Transmembrane protein 222	Tmem222
0.104738	0.481085	0.317778	Q3U422		Ndufv3
0.10469	0.226597	0.644746	P32020;P32020-2;A2APS4	Non-specific lipid-transfer protein	Scp2
0.1046	0.409857	0.387368	H3BJY1;H3BKF4;H3BIZ8;B0QZP8;O55101;H3BJ78	Synaptogyrin-2	Syngr2;Gm20708
0.104464	0.588376	0.230345	P48771	Cytochrome c oxidase subunit 7A2, mitochondrial	Cox7a2
0.104437	0.346521	0.46027	E9Q7N5;Q8R2Q4-2;Q8R2Q4;Q8R2Q4-3;Q8C1C2;E0CY79;E0CXH2	Ribosome-releasing factor 2, mitochondrial	Gfm2
0.104225	0.547688	0.261467	Q9DCI3	MLN64 N-terminal domain homolog	Stard3nl
0.103504	0.760031	0.119169	Q5F285	Transmembrane protein 256	Tmem256
0.103396	0.741535	0.129869	Q8BMG7;E9QKE4;Q8BMG7-2	Rab3 GTPase-activating protein non-catalytic subunit	Rab3gap2
0.10301	0.497312	0.303371	Q9D1H8	39S ribosomal protein L53, mitochondrial	Mrpl53
0.102882	0.220358	0.65687	Q61598;Q61598-2;P50396;D6RI86;B7FAU8	Rab GDP dissociation inhibitor beta	Gdi2
0.102194	0.700387	0.154662	Q9WV32;F6THG2;F6VVE6;D3Z6S0;Q9R0Q6	Actin-related protein 2/3 complex subunit 1B	Arpc1b
0.102097	0.731379	0.135857	Q8VIK2	Mpv17-like protein 2	Mpv17l2
0.101896	0.572981	0.24186	Q9CQX2	Cytochrome b5 type B	Cyb5b
0.101797	0.656194	0.182968	F6V6T4;Q9R0Q3;Q8BPI2	Transmembrane emp24 domain-containing protein 2	Tmed2
0.101459	0.652765	0.185243	G5E870	E3 ubiquitin-protein ligase TRIP12	Trip12
0.101452	0.564867	0.248054	Q91Z67;Q91Z69;D3YZW1	SLIT-ROBO Rho GTPase-activating protein 2	Srgap2
0.101362	0.813237	0.089783	P60335	Poly(rC)-binding protein 1	Pcbp1
0.101165	0.859736	0.0656346	Q8BVY0		Rsl1d1
0.10087	0.762774	0.117604	Q99L27;Q9DCZ1	GMP reductase 2;GMP reductase 1	Gmpr2;Gmpr
0.100145	0.405298	0.392226	Q9CRA4;D3Z458	Methylsterol monooxygenase 1	Msmo1;Sc4mol
0.0999955	0.609533	0.215003	Q9CX00	IST1 homolog	Ist1
0.0997602	0.4046	0.392974	Q9D1D4;Q9D1D4-2	Transmembrane emp24 domain-containing protein 10	Tmed10
0.0995999	0.739918	0.130816	Q8CEC0-3;Q8CEC0-2;Q8CEC0	Nuclear pore complex protein Nup88	Nup88
0.0995357	0.365192	0.437479	Q9DCM0	Protein ETHE1, mitochondrial	Ethe1
0.0995357	0.369025	0.432944	Q60930;G3UX26	Voltage-dependent anion-selective channel protein 2	Vdac2
0.0994317	0.509091	0.293205	Q8JZU2;F6VVY4		Slc25a1
0.0993581	0.376823	0.423863	Q9D0G0	28S ribosomal protein S30, mitochondrial	Mrps30
0.0989636	0.765223	0.116212	Q923D2;E9PZC3;E9PZC4	Flavin reductase (NADPH)	Blvrb
0.098419	0.708765	0.149498	Q78IK2	Up-regulated during skeletal muscle growth protein 5	Usmg5
0.0970783	0.148134	0.829344	P35486	Pyruvate dehydrogenase E1 component subunit alpha, somatic form, mitochondrial	Pdha1
0.0956412	0.202209	0.6942	Q8R2Y8	Peptidyl-tRNA hydrolase 2, mitochondrial	Ptrh2
0.0955205	0.565244	0.247764	Q8BU33;Q8BU33-3;Q8BU33-2	Acetolactate synthase-like protein	Ilvbl
0.0948374	0.44544	0.35121	E9Q2B2;Q60974-2;Q60974;Q5RIM6;E9Q8K6;F6TWR1;F6SFD2;Q5RIN0;Q3UV08;F7C134;E9Q9Y2;Q8CHB6	Nuclear receptor corepressor 1	Ncor1
0.0947722	0.369639	0.432222	Q61712;F6ZL86;F6WEH1;F6YK70;F8WH68	DnaJ homolog subfamily C member 1	Dnajc1
0.0945421	0.487214	0.31228	Q6PCP5-3;Q6PCP5;E0CYB9;F7CTF8;Q6PCP5-2;E0CYI3;F7BC60;F7B1A4;F6VAL0	Mitochondrial fission factor	Mff
0.0937022	0.700063	0.154863	P62331	ADP-ribosylation factor 6	Arf6
0.0932133	0.644893	0.190512	P62835	Ras-related protein Rap-1A	Rap1a
0.0927672	0.562607	0.249795	Q8BH86;E9QMK9;Q8BH86-2;F7CUW7	UPF0317 protein C14orf159 homolog, mitochondrial	9030617O03Rik
0.0924994	0.698274	0.155974	Q8BH43;B1AUN0;Q8R5H6	Wiskott-Aldrich syndrome protein family member 2	Wasf2
0.0919909	0.493348	0.306847	Q8C0K5;D3YVC9;Q8C0K5-2	Graves disease carrier protein homolog	Slc25a16
0.0917854	0.854287	0.0683961	Q921M3;Q921M3-2	Splicing factor 3B subunit 3	Sf3b3
0.0912672	0.552716	0.257498	Q91ZE0	Trimethyllysine dioxygenase, mitochondrial	Tmlhe
0.091079	0.088175	1.05465	Q68FL0;G5E8Y0;G3X9J1;P70414	Sodium/calcium exchanger 1	Slc8a1
0.090973	0.354345	0.450573	Q99J47-2;Q99J47	Dehydrogenase/reductase SDR family member 7B	Dhrs7b
0.090866	0.542322	0.265743	Q921V5	Alpha-1,6-mannosyl-glycoprotein 2-beta-N-acetylglucosaminyltransferase	Mgat2
0.0902775	0.5441	0.264321	Q80WG5	Leucine-rich repeat-containing protein 8A	Lrrc8a
0.0902549	0.734086	0.134253	Q924Z4;D3YTM0;D3Z0Z2;D3Z4M2	Ceramide synthase 2	Cers2
0.0901962	0.68274	0.165745	A1L3P4;B0QZV3;D3Z0Q9	Sodium/hydrogen exchanger	Slc9a6
0.0898657	0.403796	0.393838	Q3UMK4;D3YVV0;E9Q723		Ttc13
0.0890371	0.355294	0.449413	P16332	Methylmalonyl-CoA mutase, mitochondrial	Mut
0.088744	0.360252	0.443394	P58742	Aladin	Aaas
0.0884135	0.651806	0.185882	Q9CZX8;D3Z5R8;D3Z722;D3YUG3;D3YUT3	40S ribosomal protein S19	Rps19
0.0880801	0.721276	0.141899	Q80TM9;Q80TM9-2;Q80TM9-3;Q80TM9-6;Q80TM9-5;Q80TM9-4;E9PZT1;F6UKP3;F6PY46;F6ZL69;Q80TM9-7;F7AFP3;F6YR29	Nischarin	Nisch
0.0874357	0.409773	0.387457	Q9CPP6;D3YTQ8	NADH dehydrogenase [ubiquinone] 1 alpha subcomplex subunit 5	Ndufa5
0.0871762	0.551927	0.258119	Q4VBD2	Transmembrane anterior posterior transformation protein 1	Tapt1
0.0865682	0.784908	0.105181	Q8BG67;Q8BG67-2;Q8BWC5;Q6ZQ18-2;Q6ZQ18	Protein EFR3 homolog A	Efr3a
0.0859827	0.481794	0.317139	D3Z7V3;Q3URD3-2;H7BX64;Q3URD3;F8WIH0;F6UV57;Q3URD3-5;F6YCM8;Q3URD3-4;Q3URD3-3;D3YV81;D3Z0N1;F6WY34	Sarcolemmal membrane-associated protein	Slmap
0.0854776	0.313173	0.504215	A2AVJ7;Q99PL5;Q99PL5-4;Q99PL5-3;Q99PL5-2;Q99PL5-6;Q99PL5-7;Q99PL5-5;Q99PL5-8;Q99PL5-10;Q99PL5-9;Q99PL5-11;Q99PL5-12	Ribosome-binding protein 1	Rrbp1
0.0854723	0.689431	0.161509	Q8BTX9	Inactive hydroxysteroid dehydrogenase-like protein 1	Hsdl1
0.0850684	0.615158	0.211014	Q2HXL6	ER degradation-enhancing alpha-mannosidase-like protein 3	Edem3
0.0850389	0.516035	0.287321	Q8K1E0;I1E4X1;H3BJE3;Q8K1E0-2;H3BKJ7;H3BKP0;H3BJ02;H3BKD6;H3BL25;H3BJ89;H3BKP3	Syntaxin-5	Stx5;Stx5a
0.0849293	0.657875	0.181857	Q99N92	39S ribosomal protein L27, mitochondrial	Mrpl27
0.084829	0.377689	0.422865	F6SPK0;B1AWT7		Ube2j1
0.0845897	0.682837	0.165683	Q8K5B2;D3Z6A4;D3Z1G3	Multiple coagulation factor deficiency protein 2 homolog	Mcfd2
0.0844384	0.459515	0.337701	Q01768;E9PZF0	Nucleoside diphosphate kinase B;Nucleoside diphosphate kinase	Nme2;Gm20390
0.0837992	0.577977	0.23809	P62874;H3BKR2;H3BLF7;Q61011	Guanine nucleotide-binding protein G(I)/G(S)/G(T) subunit beta-1	Gnb1
0.0834365	0.895499	0.0479347	Q80XI4	Phosphatidylinositol 5-phosphate 4-kinase type-2 beta	Pip4k2b
0.0827814	0.878512	0.0562521	Q9JIK5	Nucleolar RNA helicase 2	Ddx21
0.0822695	0.873869	0.0585534	Q99ML1;D3Z2M5	Bcl-2-binding component 3	Bbc3
0.0818084	0.80341	0.0950625	Q9DB60;B1AS14	Prostamide/prostaglandin F synthase	Fam213b
0.0815588	0.697055	0.156733	Q9CWG8;Q9CWG8-2	NADH dehydrogenase [ubiquinone] complex I, assembly factor 7	Ndufaf7
0.0809233	0.81888	0.0867795	Q61235	Beta-2-syntrophin	Sntb2
0.0803494	0.496427	0.304145	Q9D1P0;F7CXG9;G5E909	39S ribosomal protein L13, mitochondrial	Mrpl13
0.0797688	0.76984	0.113599	Q3TCT4;Q3TCT4-2	Ectonucleoside triphosphate diphosphohydrolase 7	Entpd7
0.0797664	0.377937	0.422581	Q8K2B3	Succinate dehydrogenase [ubiquinone] flavoprotein subunit, mitochondrial	Sdha
0.0795373	0.782793	0.106353	P06802-2;G3X9S2;P06802;E9QQ26	Ectonucleotide pyrophosphatase/phosphodiesterase family member 1;Alkaline phosphodiesterase I;Nucleotide pyrophosphatase	Enpp1
0.0795233	0.747916	0.126147	P60521	Gamma-aminobutyric acid receptor-associated protein-like 2	Gabarapl2
0.0790942	0.570874	0.243459	Q8BGR2;D3YV62	Leucine-rich repeat-containing protein 8D	Lrrc8d
0.0789438	0.52402	0.280652	P56480	ATP synthase subunit beta, mitochondrial	Atp5b
0.0785686	0.712787	0.14704	Q3TDD9;Q3TDD9-2	Protein phosphatase 1 regulatory subunit 21	Ppp1r21
0.0780145	0.597158	0.223911	Q9CQU3	Protein RER1	Rer1
0.0773215	0.488639	0.311012	Q9DBS1	Transmembrane protein 43	Tmem43
0.0768117	0.312755	0.504795	Q8VEL0;Q8VEL0-2	Motile sperm domain-containing protein 1	Mospd1
0.0767844	0.742834	0.129108	P14869;E9Q070;D3YVM5	60S acidic ribosomal protein P0	Rplp0;Gm8730
0.0767395	0.800312	0.0967407	Q32ME1;F7AAP4;E9Q828;Q6Q477		Atp2b4
0.0767331	0.494582	0.305762	Q921R8;G3X937;Q921R8-2	Solute carrier family 41 member 3	Slc41a3
0.0755463	0.703959	0.152453	Q99LB4;D3YTL5;P24452;D3YZN3;D3YU77;D3Z014;D3Z4K5	Macrophage-capping protein	Capg
0.0750739	0.66675	0.176037	Q9D6K5	Synaptojanin-2-binding protein	Synj2bp
0.0750247	0.84204	0.0746673	Q9CPR4;Q6ZWZ7;B2RY53;F6YKV1	60S ribosomal protein L17	Rpl17
0.0747037	0.618555	0.208622	P52825;A2A8E8;A2A8E7;A2A8E9	Carnitine O-palmitoyltransferase 2, mitochondrial	Cpt2
0.0746283	0.884873	0.0531192	P08074;F6YNX9;A2AC16;Q91X52	Carbonyl reductase [NADPH] 2	Cbr2
0.0743293	0.698054	0.156111	P56135;F8WHP8	ATP synthase subunit f, mitochondrial	Atp5j2
0.0740006	0.436687	0.35983	Q9DC61;A2AIW9	Mitochondrial-processing peptidase subunit alpha	Pmpca
0.073669	0.704361	0.152205	Q9DC51;P18872-2;A2AE32;P20612;Q3V3I2;P50149;P18872;A2AE31;D3Z2M7;F6QPU5	Guanine nucleotide-binding protein G(k) subunit alpha	Gnai3
0.0730635	0.291708	0.535052	Q9DCX2;G3X9L6	ATP synthase subunit d, mitochondrial	Atp5h;Gm10250
0.0730222	0.740043	0.130743	P35585;D3YZ71;Q9WVP1;Q9WVP1-2	AP-1 complex subunit mu-1	Ap1m1
0.0727226	0.425561	0.371038	Q3TFD2;Q3TFD2-2;D6RFA8;D6RE48	Lysophosphatidylcholine acyltransferase 1	Lpcat1
0.0726281	0.816893	0.0878349	P99026	Proteasome subunit beta type-4	Psmb4
0.0723642	0.891165	0.0500418	P68368	Tubulin alpha-4A chain	Tuba4a
0.0722498	0.740197	0.130652	P56391	Cytochrome c oxidase subunit 6B1	Cox6b1
0.0722396	0.780109	0.107845	Q64735-2;Q64735	Complement component receptor 1-like protein	Cr1l
0.0721842	0.840922	0.0752445	Q9CY64	Biliverdin reductase A	Blvra
0.0716488	0.544107	0.264316	Q80X80	C2 domain-containing protein 2-like	C2cd2l
0.0715819	0.721809	0.141578	Q922B1	O-acetyl-ADP-ribose deacetylase MACROD1	Macrod1
0.0713886	0.698838	0.155623	Q8VDT9	39S ribosomal protein L50, mitochondrial	Mrpl50
0.0710489	0.668518	0.174887	P60229	Eukaryotic translation initiation factor 3 subunit E	Eif3e
0.0706217	0.768136	0.114562	P52480	Pyruvate kinase isozymes M1/M2	Pkm
0.0705258	0.713028	0.146893	Q8VCW8	Acyl-CoA synthetase family member 2, mitochondrial	Acsf2
0.0703933	0.612937	0.212584	O54692	Centromere/kinetochore protein zw10 homolog	Zw10
0.0703847	0.676655	0.169632	Q6S5C2;Q6S5C2-2	N-acetylglucosamine-1-phosphotransferase subunit gamma	Gnptg
0.0702248	0.465598	0.331989	Q9CRD2	ER membrane protein complex subunit 2	Emc2
0.0694379	0.530855	0.275024	Q8BRF7;Q8BRF7-3;Q8BRF7-2	Sec1 family domain-containing protein 1	Scfd1
0.0692471	0.654408	0.184152	Q61543;F8WHM5;F6RSH1;E9PWD8	Golgi apparatus protein 1	Glg1
0.0681674	0.573548	0.24143	Q14CH7	Alanine--tRNA ligase, mitochondrial	Aars2
0.0678792	0.71677	0.14462	P20065-2;P20065	Thymosin beta-4;Hematopoietic system regulatory peptide	Tmsb4x
0.0673956	0.662302	0.178944	Q3UXD9;Q99MZ7;D6RHN4;D6RIP0	Peroxisomal trans-2-enoyl-CoA reductase	Pecr
0.0672855	0.750304	0.124763	Q9D5T0	ATPase family AAA domain-containing protein 1	Atad1
0.0671374	0.715676	0.145283	Q505D7	Optic atrophy 3 protein homolog	Opa3
0.0666156	0.792297	0.101112	Q9JI39	ATP-binding cassette sub-family B member 10, mitochondrial	Abcb10
0.0665899	0.259281	0.586229	P51881;Q3V132	ADP/ATP translocase 2	Slc25a5
0.066134	0.457114	0.339976	Q3TDN2;Q3TDN2-2;D3Z2H4;D3YUP4;D3Z4G9;D6RE51	FAS-associated factor 2	Faf2
0.0657318	0.824719	0.083694	Q9D1I6	39S ribosomal protein L14, mitochondrial	Mrpl14
0.0657303	0.842992	0.0741763	O09106;D3YYI8	Histone deacetylase 1;Histone deacetylase	Hdac1;Gm10093
0.0657102	0.739575	0.131018	E9PZK7;Q8BXL7	ADP-ribosylation factor-related protein 1	Arfrp1
0.0653361	0.633088	0.198536	Q7TMG8;O55126	Protein NipSnap homolog 2	Gbas
0.0647363	0.738186	0.131834	Q9CPU4	Microsomal glutathione S-transferase 3	Mgst3
0.0645778	0.663208	0.17835	Q8C1E7;D3Z0U3	Transmembrane protein 120A	Tmem120a
0.0640687	0.899717	0.0458939	A2AFJ1;Q60973;A2AFI9;F6ZLC6;F6U539	Histone-binding protein RBBP7	Rbbp7
0.0637933	0.781536	0.107051	Q5SYL3	UPF0378 protein KIAA0100	Kiaa0100
0.0635119	0.555736	0.255131	Q05920;G5E8R3;E9QPD7	Pyruvate carboxylase, mitochondrial;Pyruvate carboxylase	Pc;Pcx
0.0634704	0.793481	0.100464	E9QNL8;E9Q5M7;P24063;D3Z627;D3YW95	Integrin alpha-L	Itgal
0.0631291	0.542578	0.265538	Q8BFR5;D3YVN7;Q8BFR5-2	Elongation factor Tu, mitochondrial;Elongation factor Tu	Tufm;Gm9755
0.0628093	0.555709	0.255153	Q8C7Q2;P40201;G3V014;E9PZM4	Chromodomain-helicase-DNA-binding protein 1	Chd1;Chd2
0.0623876	0.705709	0.151374	P09055	Integrin beta-1	Itgb1
0.061644	0.721184	0.141954	Q9EQH2	Endoplasmic reticulum aminopeptidase 1	Erap1
0.0614005	0.602429	0.220094	Q5U458;E9Q8B3;A2A8D1	DnaJ homolog subfamily C member 11	Dnajc11
0.0612501	0.498899	0.301988	P70302	Stromal interaction molecule 1	Stim1
0.0612114	0.612884	0.212621	Q9EP69	Phosphatidylinositide phosphatase SAC1	Sacm1l
0.0611027	0.767156	0.115116	E9Q1S3;Q01405	Protein transport protein Sec23A	Sec23a
0.060927	0.791338	0.101638	Q9CR20;D6RI20;J3QMQ2	Immediate early response 3-interacting protein 1	Ier3ip1;Hdhd2;Gm10784
0.0597181	0.743296	0.128838	Q3U1F9	Phosphoprotein associated with glycosphingolipid-enriched microdomains 1	Pag1
0.0594322	0.562	0.250264	Q99LY9;B1ARW4	NADH dehydrogenase [ubiquinone] iron-sulfur protein 5;NADH dehydrogenase [ubiquinone] iron-sulfur protein 5, N-terminally processed	Ndufs5
0.0593073	0.711497	0.147827	Q9CPR5;Q9CPR5-2;F8WHN1	39S ribosomal protein L15, mitochondrial	Mrpl15
0.0586202	0.710951	0.14816	Q9CQS8;E9PW43	Protein transport protein Sec61 subunit beta	Sec61b;Gm10320
0.0575876	0.802345	0.0956391	Q8BVF7-2;Q8BVF7	Gamma-secretase subunit APH-1A	Aph1a
0.0571298	0.718317	0.143684	Q91W34;Q91W34-2;D6RDS0	UPF0420 protein C16orf58 homolog	BC017158
0.0567075	0.700029	0.154884	Q3TUH1;G5E881;G3UWL8;Q3TUH1-2;D6RGT1;G3UYJ1	Mitochondrial translocator assembly and maintenance protein 41 homolog	Tamm41
0.05643	0.850545	0.0703028	O54988-2;O54988	STE20-like serine/threonine-protein kinase	Slk
0.0559299	0.827622	0.0821679	Q8R035;Q8R035-2;A2A6T4;D6RHR8	Peptidyl-tRNA hydrolase ICT1, mitochondrial	Ict1
0.0554556	0.64772	0.188613	P38647	Stress-70 protein, mitochondrial	Hspa9
0.0547374	0.851525	0.0698027	Q6PDY2	2-aminoethanethiol dioxygenase	Ado
0.054452	0.541045	0.266766	Q9JJL8	Serine--tRNA ligase, mitochondrial	Sars2
0.0541929	0.657647	0.182007	Q9JM13	Rab5 GDP/GTP exchange factor	Rabgef1
0.0540109	0.773072	0.11178	Q9CR51	V-type proton ATPase subunit G 1	Atp6v1g1
0.0540044	0.868058	0.0614511	O35454;A2A7F6;E9Q741	Chloride transport protein 6	Clcn6
0.0535155	0.811839	0.0905302	Q9CY27;G3UWE1;Q52L67	Very-long-chain enoyl-CoA reductase	Tecr
0.0527365	0.570542	0.243712	P24369	Peptidyl-prolyl cis-trans isomerase B	Ppib
0.0520536	0.821921	0.0851698	Q04899;Q8K0D0-2;Q04735-2;Q04735;Q8K0D0	Cyclin-dependent kinase 18	Cdk18
0.0514176	0.713218	0.146778	P39098-2;P39098;A2A723	Mannosyl-oligosaccharide 1,2-alpha-mannosidase IB	Man1a2
0.0513646	0.826013	0.083013	Q9EPK2;Q9EPK2-3;Q9EPK2-2;Q9EPK2-4	Protein XRP2	Rp2
0.0511704	0.867611	0.0616748	P40237;A2AIJ1;A2AIJ2	CD82 antigen	Cd82
0.0506261	0.585621	0.232383	Q9DCN2-2;Q9DCN2;F2Z456;F2Z3V0	NADH-cytochrome b5 reductase 3;NADH-cytochrome b5 reductase 3 membrane-bound form;NADH-cytochrome b5 reductase 3 soluble form	Cyb5r3
0.0505761	0.615451	0.210806	Q8CC88;Q8CC88-2;Q8CC88-3	von Willebrand factor A domain-containing protein 8	Vwa8
0.050319	0.722567	0.141122	Q9D1G1	Ras-related protein Rab-1B	Rab1b
0.0501976	0.787602	0.103693	Q9D6K9;Q9D6K9-2;H3BJ49;H3BJH5;H3BJQ0;H3BLB3	Ceramide synthase 5	Cers5
0.049956	0.816916	0.0878223	Q9CR67;Q9CZM3;E0CXY5	Transmembrane protein 33	Tmem33
0.0498706	0.895218	0.0480713	Q7TNS2	Mitochondrial inner membrane organizing system protein 1	Minos1
0.049753	0.796294	0.0989264	H3BLL3;Q921G6;H3BIX9;H3BLB4;H3BJU9	Leucine-rich repeat and calponin homology domain-containing protein 4	Lrch4
0.0496339	0.880396	0.0553217	Q31125	Zinc transporter SLC39A7	Slc39a7
0.0493108	0.757728	0.120487	Q9CQ10	Charged multivesicular body protein 3	Chmp3
0.0491207	0.631683	0.1995	Q8BHN3;Q8BHN3-2;Q8BHN3-3	Neutral alpha-glucosidase AB	Ganab
0.0490158	0.909789	0.0410591	Q64435;K9J7B2	UDP-glucuronosyltransferase 1-6	Ugt1a6;Ugt1a6b
0.0485601	0.876882	0.0570588	E9Q8N1;E9Q8K5;A2ASS6;A2ASS6-2;F7CR78;A2AT70	Titin	Ttn
0.0483507	0.666496	0.176202	Q99KE1;Q8BMF3	NAD-dependent malic enzyme, mitochondrial	Me2
0.0481993	0.510794	0.291754	P55302;F6WMD1	Alpha-2-macroglobulin receptor-associated protein	Lrpap1
0.0470896	0.71035	0.148528	Q9D1I2	Bcl10-interacting CARD protein
0.0469338	0.868065	0.0614477	Q64261;J3QPN4	Cyclin-dependent kinase 6	Cdk6
0.0463766	0.767156	0.115116	Q8VEK0;D3YVV1	Cell cycle control protein 50A	Tmem30a
0.0461641	0.764919	0.116385	Q99J21;Q99J21-2;E0CZ07	Mucolipin-1	Mcoln1
0.0453092	0.642164	0.192354	Q9D051	Pyruvate dehydrogenase E1 component subunit beta, mitochondrial	Pdhb
0.0451326	0.793797	0.100291	E9Q7T4;Q6PHS6;E9QNG6	Sorting nexin-13	Snx13
0.0439433	0.849708	0.0707304	Q9R1C6;F2Z490	Diacylglycerol kinase epsilon	Dgke
0.0438236	0.526229	0.278825	Q99N93	39S ribosomal protein L16, mitochondrial	Mrpl16
0.0437063	0.540661	0.267075	Q9Z110-2;Q9Z110;D3Z0B4;H3BKJ8;H3BLE8;H3BKK0	Delta-1-pyrroline-5-carboxylate synthase;Glutamate 5-kinase;Gamma-glutamyl phosphate reductase	Aldh18a1
0.0433415	0.621809	0.206343	Q3U3R4-2;Q3U3R4;Q3U3R4-3;D6RDS1;Q3U3R4-4;F6RND1	Lipase maturation factor 1	Lmf1
0.0430895	0.851581	0.0697739	H3BJG4;E9Q512;Q8BVJ9		Trip11
0.043072	0.775955	0.110163	Q9D0F6	Replication factor C subunit 5	Rfc5
0.0426607	0.786162	0.104488	Q921M4-2;Q921M4;E9PUQ5;A2AN46;A2AN48;A2AN44;A2AN45;A2AN42	Golgin subfamily A member 2	Golga2
0.0426062	0.85553	0.0677646	Q9ERD8;E9PYG5;F2Z401;F2Z489;A6PW97	Gamma-parvin	Parvg
0.0424099	0.864444	0.0632633	O08539-2;Q6P1B9;O08539	Myc box-dependent-interacting protein 1	Bin1
0.0424087	0.845201	0.0730397	Q60855;F7D1J2	Receptor-interacting serine/threonine-protein kinase 1	Ripk1
0.0423424	0.898791	0.0463414	Q9WVL0	Maleylacetoacetate isomerase	Gstz1
0.0422239	0.850882	0.0701305	Q9CWD8;F7D3P0	Iron-sulfur protein NUBPL	Nubpl
0.0420939	0.818192	0.0871446	Q6PGG2;Q6PGG2-2	GEM-interacting protein	Gmip
0.0420062	0.86149	0.0647496	Q31621;P28078	Class II histocompatibility antigen, M alpha chain	H2-DMa
0.0417177	0.846463	0.0723923	Q8K3K7;A2AI22	1-acyl-sn-glycerol-3-phosphate acyltransferase beta	Agpat2
0.0405733	0.799988	0.0969167	Q8VE11	Myotubularin-related protein 6	Mtmr6
0.0404315	0.891912	0.0496779	Q9WUM3;D3YUG6	Coronin-1B	Coro1b
0.0393478	0.782246	0.106657	Q8CFI5;A8Y5T6;A2AVQ7	Probable proline--tRNA ligase, mitochondrial	Pars2
0.0391481	0.793918	0.100224	Q8VDC0	Probable leucine--tRNA ligase, mitochondrial	Lars2
0.0391	0.78725	0.103888	Q9Z2W0	Aspartyl aminopeptidase	Dnpep
0.0390408	0.872453	0.0592581	Q8C1B7-3;Q8C1B7-2;Q8C1B7	Septin-11	40787
0.0383085	0.871273	0.0598456	E9Q3L2;F6Y9T6		Pi4ka
0.0376698	0.79289	0.100787	Q91VN4;E9Q4M4	Coiled-coil-helix-coiled-coil-helix domain-containing protein 6, mitochondrial	Chchd6
0.0376596	0.564787	0.248115	Q64521;A2AQR0	Glycerol-3-phosphate dehydrogenase, mitochondrial	Gpd2
0.0371353	0.605682	0.217756	Q9CZ13	Cytochrome b-c1 complex subunit 1, mitochondrial	Uqcrc1
0.0361045	0.883816	0.0536383	E9Q9B7		Kidins220
0.0354664	0.833317	0.0791899	O70325-2;O70325;Q76LV0;Q91XR9	Phospholipid hydroperoxide glutathione peroxidase, mitochondrial;Glutathione peroxidase;Phospholipid hydroperoxide glutathione peroxidase, nuclear	Gpx4
0.0348982	0.9083	0.0417705	Q8BM72;Q8BM72-2;D3Z0Y0	Heat shock 70 kDa protein 13	Hspa13
0.0348466	0.877779	0.0566149	Q8CI95;G5E8A0;Q8R2T7	Oxysterol-binding protein-related protein 11;Oxysterol-binding protein	Osbpl11
0.0340892	0.767878	0.114708	Q9EQ80;D3Z0G0;E9PWJ6	NIF3-like protein 1	Nif3l1
0.0339816	0.937507	0.0280254	P59279;Q3TEG7	Ras-related protein Rab-2B	Rab2b
0.0334069	0.940434	0.0266715	Q2PFD7-4;Q2PFD7-5;F6Z9E6;Q2PFD7-2;Q2PFD7;Q2PFD7-3	PH and SEC7 domain-containing protein 3	Psd3
0.0333743	0.927537	0.0326687	Q9WUK4	Replication factor C subunit 2	Rfc2
0.0316741	0.742504	0.129301	Q9CXT8;D3Z1T9	Mitochondrial-processing peptidase subunit beta	Pmpcb
0.0315745	0.900529	0.0455024	Q6NXH2	Glycoprotein endo-alpha-1,2-mannosidase	Manea
0.0313577	0.911715	0.0401408	Q9CPW4;Q3UA72	Actin-related protein 2/3 complex subunit 5	Arpc5
0.031278	0.753293	0.123036	Q6P5E4;G3UYG7;G3UZC1;G3UZU8;G3UY73;E9Q4X2	UDP-glucose:glycoprotein glucosyltransferase 1	Uggt1
0.0308783	0.720991	0.14207	Q8C2E7;Q8C2E7-2	WASH complex subunit strumpellin	Kiaa0196
0.0306188	0.645542	0.190075	Q9CZE3;Q8QZZ8	Ras-related protein Rab-32	Rab32
0.030278	0.839379	0.0760417	Q7JCY6;P03911	NADH-ubiquinone oxidoreductase chain 4	mt-Nd4;Mtnd4
0.0297298	0.880528	0.055257	P26041	Moesin	Msn
0.0293195	0.846408	0.0724203	Q3TML0;Q922R8	Protein disulfide-isomerase A6	Pdia6
0.0292601	0.727167	0.138366	Q3TZM9;Q3TZM9-2;Q3TZM9-3;F6R220	GDP-Man:Man(3)GlcNAc(2)-PP-Dol alpha-1,2-mannosyltransferase	Alg11
0.0284849	0.76384	0.116998	P22315;Q544X6	Ferrochelatase, mitochondrial;Ferrochelatase	Fech
0.0281998	0.826924	0.0825347	A2ALW5;A2ALW5-2	DnaJ homolog subfamily C member 25	Dnajc25
0.0280422	0.890438	0.0503965	D3Z5K6;Q9CQV7;Q9CQV7-3;Q9CQV7-2;G3X8S1	Mitochondrial import inner membrane translocase subunit TIM14	Dnajc19
0.0278771	0.842174	0.0745984	Q99MR8;D6RI29;F6Z2J7	Methylcrotonoyl-CoA carboxylase subunit alpha, mitochondrial	Mccc1
0.0277491	0.875196	0.0578946	Q9EQ20	Methylmalonate-semialdehyde dehydrogenase [acylating], mitochondrial	Aldh6a1
0.0275508	0.914274	0.0389238	Q9WU78;Q9WU78-3;Q9WU78-2	Programmed cell death 6-interacting protein	Pdcd6ip
0.0273926	0.847103	0.0720639	Q9D404;D3Z6F9	3-oxoacyl-[acyl-carrier-protein] synthase, mitochondrial	Oxsm
0.0273746	0.904932	0.0433843	O35379;E9Q1I5;D3YZY1;D3Z407;D3YYJ6	Multidrug resistance-associated protein 1	Abcc1
0.0270935	0.9171	0.0375833	D3Z4T4;Q8BTY8-2;Q8BTY8;Q8BTY8-4;Q8BTY8-3	Sec1 family domain-containing protein 2	Scfd2
0.0267096	0.820296	0.0860291	Q8BMD8	Calcium-binding mitochondrial carrier protein SCaMC-1	Slc25a24
0.0266172	0.902204	0.044695	P19536;Q9D881	Cytochrome c oxidase subunit 5B, mitochondrial	Cox5b
0.0262573	0.864251	0.0633603	Q9CZP5	Mitochondrial chaperone BCS1	Bcs1l
0.0262162	0.861528	0.0647306	Q3U1J4	DNA damage-binding protein 1	Ddb1
0.0261236	0.840709	0.0753542	Q8BU14	Translocation protein SEC62	Sec62
0.0254386	0.868705	0.0611279	P62270;F6YVP7;G3UZW2;F5H8M6	40S ribosomal protein S18	Rps18;Gm10260;Rps18-ps3
0.0254081	0.861437	0.0647763	Q99JY0;D3YXU1	Trifunctional enzyme subunit beta, mitochondrial;3-ketoacyl-CoA thiolase	Hadhb
0.0253679	0.881948	0.0545569	Q8BGT0;D3Z4W7;D3Z790	Osteopetrosis-associated transmembrane protein 1	Ostm1
0.0252157	0.839091	0.0761912	Q60597;Q60597-3;Q60597-2;Q60597-4;E9Q7L0;Q5SVY0;Q5SVY1	2-oxoglutarate dehydrogenase, mitochondrial	Ogdh
0.0250455	0.806864	0.0931998	Q9Z2Z6	Mitochondrial carnitine/acylcarnitine carrier protein	Slc25a20
0.0250294	0.785462	0.104875	Q9D2R8;Q8R2K5	28S ribosomal protein S33, mitochondrial	Mrps33
0.0248183	0.833203	0.0792494	Q6PDG8;Q6PDG8-2	Vacuolar fusion protein MON1 homolog A	Mon1a
0.0245856	0.892044	0.0496136	O35887;G3UWR0;G3UWV3;G3UY49	Calumenin	Calu
0.0233461	0.872749	0.0591109	Q99KW9	T-cell immunomodulatory protein	Itfg1
0.0231551	0.883263	0.0539099	Q9ER41;F6VK94;D6REF0	Torsin-1B	Tor1b
0.0231453	0.872172	0.059398	Q91ZN5-2;Q91ZN5	Adenosine 3-phospho 5-phosphosulfate transporter 1	Slc35b2
0.022793	0.712033	0.1475	Q99KI3	ER membrane protein complex subunit 3	Emc3
0.022735	0.919263	0.0365604	O88845;O88845-2;O88845-3	A-kinase anchor protein 10, mitochondrial	Akap10
0.0224201	0.953797	0.020544	P18155	Bifunctional methylenetetrahydrofolate dehydrogenase/cyclohydrolase, mitochondrial;NAD-dependent methylenetetrahydrofolate dehydrogenase;Methenyltetrahydrofolate cyclohydrolase	Mthfd2
0.022365	0.873713	0.0586312	Q99LI2;A2AEM2	Chloride channel CLIC-like protein 1	Clcc1
0.0215966	0.960103	0.0176823	Q9D1Q4	Dolichol-phosphate mannosyltransferase subunit 3	Dpm3
0.0204289	0.922934	0.0348295	P07742	Ribonucleoside-diphosphate reductase large subunit	Rrm1
0.0202983	0.947372	0.0234795	Q8VD58	Protein EVI2B	Evi2b
0.0194705	0.870451	0.0602556	Q921Q3-2;Q921Q3	Chitobiosyldiphosphodolichol beta-mannosyltransferase	Alg1
0.0193097	0.664812	0.177301	Q8JZR0	Long-chain-fatty-acid--CoA ligase 5	Acsl5
0.0192403	0.933391	0.0299362	Q9D7J6	Deoxyribonuclease-1-like 1	Dnase1l1
0.0186157	0.803706	0.094903	Q9CRB9;Q9D9P1;D3Z0L4;F6QFL0	Coiled-coil-helix-coiled-coil-helix domain-containing protein 3, mitochondrial	Chchd3
0.0185442	0.847025	0.0721036	Q8BKZ9;A2AWH8;A2AWH7	Pyruvate dehydrogenase protein X component, mitochondrial	Pdhx
0.0184853	0.911952	0.0400282	Q91V35;P18052-2;P18052;P49446-3;P49446-2;P49446	Receptor-type tyrosine-protein phosphatase alpha	Ptpra
0.0182805	0.849059	0.071062	Q61335	B-cell receptor-associated protein 31	Bcap31
0.0178033	0.927021	0.0329106	Q3UIA2;Q3UIA2-2;E9QAJ9;Q3UIA2-4;Q3UIA2-3;Q5SSM3-2;Q5SSM3-3;Q5SSM3	Rho GTPase-activating protein 17	Arhgap17
0.017361	0.865778	0.0625935	Q9D6I7;D3YW04	Protein FAM69A	Fam69a
0.0173157	0.883588	0.0537504	Q9CQF0	39S ribosomal protein L11, mitochondrial	Mrpl11
0.017146	0.657702	0.181971	Q9DC69	NADH dehydrogenase [ubiquinone] 1 alpha subcomplex subunit 9, mitochondrial	Ndufa9
0.0170041	0.824908	0.0835946	Q9CQQ7	ATP synthase subunit b, mitochondrial	Atp5f1
0.017002	0.901084	0.0452349	Q9CPV3	39S ribosomal protein L42, mitochondrial	Mrpl42
0.0165092	0.915112	0.0385258	Q80ZK0;E9QJS0;G5E8U8;G5E8U5;D3Z6K5	28S ribosomal protein S10, mitochondrial	Mrps10
0.0162499	0.938851	0.0274035	Q05D44	Eukaryotic translation initiation factor 5B	Eif5b
0.0154737	0.923305	0.0346549	Q61578	NADPH:adrenodoxin oxidoreductase, mitochondrial	Fdxr
0.0154118	0.961274	0.0171528	Q9D8N0	Elongation factor 1-gamma	Eef1g
0.015013	0.912672	0.0396852	Q9D3P8;D3YXU2;D3YY76;D3YV19	Plasminogen receptor (KT)	Plgrkt
0.0148622	0.898295	0.0465808	Q9D8V0;Q9D8V0-3;Q6PGJ8;Q9D8V0-2	Minor histocompatibility antigen H13	Hm13
0.0145661	0.907574	0.0421181	Q8BMS1	Trifunctional enzyme subunit alpha, mitochondrial;Long-chain enoyl-CoA hydratase;Long chain 3-hydroxyacyl-CoA dehydrogenase	Hadha
0.0145426	0.920731	0.0358673	P58681	Toll-like receptor 7	Tlr7
0.0144298	0.922531	0.035019	A2AGT5-3;K3W4R5;A2AGT5;A2AGT5-2	Cytoskeleton-associated protein 5	Ckap5
0.014275	0.964287	0.0157935	F7DBB3;Q3URZ6		Ahnak2
0.0141265	0.943328	0.0253372	Q9D8H7	Metalloendopeptidase OMA1, mitochondrial	Oma1
0.0136593	0.953324	0.0207595	Q8K304-2;Q8K304	Transmembrane protein 129	Tmem129
0.0136536	0.933132	0.030057	Q9D7N6	39S ribosomal protein L30, mitochondrial	Mrpl30
0.0132804	0.971037	0.0127641	Q18PI6;Q18PI6-3;Q18PI6-2	SLAM family member 5	Cd84
0.0132576	0.922375	0.0350923	Q9CQC7	NADH dehydrogenase [ubiquinone] 1 beta subcomplex subunit 4	Ndufb4
0.0126724	0.957826	0.0187136	Q8BYW1-2;Q8BYW1-3;Q8BYW1	Rho GTPase-activating protein 25	Arhgap25
0.0123045	0.925818	0.0334743	Q8BM55;D3Z6S1;Q8BM55-3;Q8BM55-2	Transmembrane protein 214	Tmem214
0.0121034	0.95356	0.0206521	P15535-2;P15535;B1AXY5	Beta-1,4-galactosyltransferase 1;Lactose synthase A protein;N-acetyllactosamine synthase;Beta-N-acetylglucosaminylglycopeptide beta-1,4-galactosyltransferase;Beta-N-acetylglucosaminyl-glycolipid beta-1,4-galactosyltransferase;Processed beta-1,4-galactosyltransferase 1	B4galt1
0.0113722	0.981786	0.00798302	P08226;G3UWN5;G3UZM8;E9Q327	Apolipoprotein E	Apoe
0.0109001	0.978061	0.00963404	Q6PAR5-5;Q6PAR5-2;Q6PAR5;Q6PAR5-4;Q6PAR5-6;F7ADT6;F7ADQ2;F7ADS7;F6X819;F6UFP6;E9Q0D1;Q6PAR5-3	GTPase-activating protein and VPS9 domain-containing protein 1	Gapvd1
0.0108119	0.928256	0.0323324	Q99LM2;A2A6E1;A2A6D9;B0QZI8;D6RJ46;F2Z486;D6RII4;Q60636-2	CDK5 regulatory subunit-associated protein 3	Cdk5rap3
0.0106767	0.968144	0.0140601	A2AUR7;Q9D031;Q01730;B1AYQ0;E0CXH9;E0CXG5	Ras suppressor protein 1	Rsu1
0.0106401	0.947017	0.0236422	P52503;D3YW32	NADH dehydrogenase [ubiquinone] iron-sulfur protein 6, mitochondrial	Ndufs6
0.00954377	0.977843	0.00973096	P59999;E9PWA7	Actin-related protein 2/3 complex subunit 4	Arpc4
0.00942501	0.936487	0.0284983	Q02819;H3BK79;D3Z7D7;D3Z1N1	Nucleobindin-1	Nucb1
0.00920303	0.966226	0.0149211	Q9JHL0;Q9JHL0-2	Linker for activation of T-cells family member 2	Lat2
0.00888236	0.944849	0.0246378	E9Q7G1;D3YZZ5		Tmed7
0.0086015	0.96775	0.0142367	G5E897		Kdelc2
0.00835231	0.971336	0.0126303	Q9D850	Transmembrane protein 68	Tmem68
0.00807481	0.94499	0.0245727	Q3UVL4-2;Q3UVL4;Q3UVL4-3	Vacuolar protein sorting-associated protein 51 homolog	Vps51
0.00776747	0.982536	0.00765162	Q9CWK8	Sorting nexin-2	Snx2
0.00758118	0.869715	0.0606232	Q8CAQ8-2
0.00714267	0.963856	0.0159877	Q3U4W8;P56399;D3YYA5;D3Z4K7	Ubiquitin carboxyl-terminal hydrolase;Ubiquitin carboxyl-terminal hydrolase 5	Usp5
0.00701483	0.986361	0.00596396	Q9CQN6	Transmembrane protein 14C	Tmem14c
0.0059294	0.974646	0.0111533	E9Q0V1;D6RFD6;Q8C3B8;Q8C3B8-2	Protein RFT1 homolog	Rft1
0.00573435	0.970582	0.012968	D6RGM8;D3YWH4;D3Z6X7;Q9DBU0;D3Z279;D3YYW1	Transmembrane 9 superfamily member 1	Tm9sf1
0.00551249	0.976516	0.0103207	Q3TXX3-2;Q3TXX3;E9Q4U6	Protrudin	Zfyve27
0.00517967	0.983807	0.00709026	Q9Z1M0;Q3UN00;F8WI93;Q6P5P0	P2X purinoceptor 7;P2X purinoceptor	P2rx7
0.00512114	0.955891	0.0195918	Q9CQJ8	NADH dehydrogenase [ubiquinone] 1 beta subcomplex subunit 9	Ndufb9
0.00495869	0.966043	0.0150036	Q99J23;A2A5D6	GH3 domain-containing protein	Ghdc
0.00452492	0.980572	0.00852031	Q60902-3;Q60902-4;Q60902-2;Q60902	Epidermal growth factor receptor substrate 15-like 1	Eps15l1
0.00404683	0.991569	0.00367717	P11499;E9Q3D6;E9PX27;E9Q0C3;D3Z1R1;REV__Q8BL66	Heat shock protein HSP 90-beta	Hsp90ab1
0.00399329	0.991676	0.00363036	Q8C6U2;Q8C259	PQ-loop repeat-containing protein 3	Pqlc3
0.00365702	0.995092	0.00213656	P99024	Tubulin beta-5 chain	Tubb5
0.00320912	0.98216	0.00781768	Q9ER88;G3X9M0;Q9ER88-2;G3UWZ6;G3UWM7;G3UWJ4;G3UZC0;G3UWR5;G3UYM6;G3UYP3	28S ribosomal protein S29, mitochondrial	Dap3
0.00314119	0.99424	0.00250897	Q812F8;F7BME0	Alpha-1,3-mannosyl-glycoprotein 4-beta-N-acetylglucosaminyltransferase B	Mgat4b
0.00293888	0.991138	0.00386574	P18760;F8WGL3;P45591	Cofilin-1	Cfl1
0.00277966	0.989547	0.00456352	Q6KAR6	Exocyst complex component 3	Exoc3
0.00209629	0.992014	0.00348204	Q6XPS7		Tha1
0.0013427	0.995132	0.00211934	Q8C4U8;O35474;Q8C8K0	EGF-like repeat and discoidin I-like domain-containing protein 3	Edil3
0.00120806	0.993233	0.00294897	Q78IS1	Transmembrane emp24 domain-containing protein 3	Tmed3
0.000717056	0.997191	0.00122172	Q8K595-2;Q8K595	Mucolipin-2	Mcoln2
0.000523379	0.995673	0.00188316	Q60932-2;Q60932;F2Z471	Voltage-dependent anion-selective channel protein 1	Vdac1
0.000321147	0.998201	0.000782088	Q3ULD5	Methylcrotonoyl-CoA carboxylase beta chain, mitochondrial	Mccc2
0.000250542	0.999599	0.00017413	Q920E5	Farnesyl pyrophosphate synthase	Fdps
-0.000169466	0.999303	0.000302853	Q8K1A5;D6RIR0;D6RFP3;D6RDC1;Q8K1A5-3;Q8K1A5-2	Transmembrane protein 41B	Tmem41b
-0.000300933	0.998792	0.000524824	Q8R123;Q8R123-2;E0CZ66;F8WGX4	FAD synthase;Molybdenum cofactor biosynthesis protein-like region;FAD synthase region	Flad1
-0.000705992	0.995785	0.0018346	O70503;O70503-2	Estradiol 17-beta-dehydrogenase 12	Hsd17b12
-0.00183933	0.988182	0.00516309	Q9CR68	Cytochrome b-c1 complex subunit Rieske, mitochondrial;Cytochrome b-c1 complex subunit 11	Uqcrfs1
-0.00230892	0.991816	0.00356884	F8VQF9;Q3TLI0	Trafficking protein particle complex subunit 10	Trappc10
-0.00262546	0.993593	0.00279161	Q8BXV2	BRI3-binding protein	Bri3bp
-0.00263172	0.990461	0.00416242	Q99KR3	Beta-lactamase-like protein 2	Lactb2
-0.00548091	0.960663	0.0174288	Q9R0H0-2;Q9R0H0;A2A848	Peroxisomal acyl-coenzyme A oxidase 1	Acox1
-0.0059769	0.975629	0.0107153	Q8C3X2;Q8C3X2-2	Coiled-coil domain-containing protein 90B, mitochondrial	Ccdc90b
-0.00599224	0.979991	0.00877808	Q8C407;Q8C407-2	Protein YIPF4	Yipf4
-0.00599677	0.983841	0.00707496	Q8VDQ8-2;Q8VDQ8;E9PXF5	NAD-dependent protein deacetylase sirtuin-2	Sirt2
-0.00611312	0.956249	0.019429	Q9D0F3;D3Z5B9	Protein ERGIC-53	Lman1
-0.00668893	0.973143	0.0118234	Q9CZV8-4;Q9CZV8;Q9CZV8-3;A2A536;A2A533	F-box/LRR-repeat protein 20	Fbxl20
-0.00700087	0.977799	0.0097505	Q9CQ54	NADH dehydrogenase [ubiquinone] 1 subunit C2	Ndufc2
-0.00767393	0.948447	0.0229868	P38060;D3YVU9;Q3TPS7;Q8JZS7	Hydroxymethylglutaryl-CoA lyase, mitochondrial	Hmgcl
-0.00792895	0.956884	0.0191408	Q8BYW9;D3YWW8;D3Z459	EGF domain-specific O-linked N-acetylglucosamine transferase	Eogt
-0.00807456	0.964605	0.0156505	Q6PDL0	Cytoplasmic dynein 1 light intermediate chain 2	Dync1li2
-0.00818553	0.928266	0.0323274	Q03265;D6RJ16	ATP synthase subunit alpha, mitochondrial	Atp5a1
-0.00860794	0.964958	0.0154918	Q6A026;E9QPI5	Sister chromatid cohesion protein PDS5 homolog A	Pds5a
-0.00862929	0.978673	0.00936246	Q9WUU8-2;Q9WUU8-3;D3Z2W0;Q9WUU8;E9QM75;D3Z3B6	TNFAIP3-interacting protein 1	Tnip1
-0.00977305	0.923448	0.0345874	Q9D0D3	Poly(A) RNA polymerase, mitochondrial	Mtpap
-0.0101569	0.931178	0.0309673	Q9DBL7	Bifunctional coenzyme A synthase;Phosphopantetheine adenylyltransferase;Dephospho-CoA kinase	Coasy
-0.0104324	0.933221	0.0300156	Q9CQZ0;Q9CQZ0-2	ORM1-like protein 2	Ormdl2
-0.0109516	0.91598	0.0381139	Q61070	Etoposide-induced protein 2.4	Ei24
-0.0112324	0.924566	0.0340619	Q8BGH2	Sorting and assembly machinery component 50 homolog	Samm50
-0.0115182	0.967447	0.0143729	Q8K4Z3	NAD(P)H-hydrate epimerase	Apoa1bp
-0.011941	0.961636	0.0169891	Q9ES52-3;Q9ES52-2;Q9ES52;Q9ES52-6;Q9ES52-5;Q9ES52-4	Phosphatidylinositol 3,4,5-trisphosphate 5-phosphatase 1	Inpp5d
-0.0122216	0.937636	0.0279656	Q9DB20;F7D3P8;F6XVM5	ATP synthase subunit O, mitochondrial	Atp5o
-0.0126812	0.941112	0.0263588	Q8BGT9;A2ANU2	Polypeptide N-acetylgalactosaminyltransferase 12	Galnt12
-0.012893	0.91479	0.0386787	Q64133	Amine oxidase [flavin-containing] A	Maoa
-0.0132379	0.935511	0.0289509	Q8K3A0;F6UL52;F6WN43	Iron-sulfur cluster co-chaperone protein HscB, mitochondrial	Hscb
-0.0133351	0.941655	0.0261081	A2AJQ3-2;A2AJQ3;A2AJQ2;D6RI72;A2AJQ1	Probable C-mannosyltransferase DPY19L4	Dpy19l4
-0.0134898	0.903551	0.0440473	Q9QYA2;G3UY77	Mitochondrial import receptor subunit TOM40 homolog	Tomm40
-0.0135327	0.928425	0.0322532	Q9D7B6;D3YTT4	Isobutyryl-CoA dehydrogenase, mitochondrial	Acad8
-0.0135559	0.967433	0.0143791	Q99M96-7;Q99M96-9;Q99M96-4;Q99M96-6;Q99M96-8;Q99M96-5;Q99M96-3;Q99M96-2;Q99M96;D3YUN2;D3YUM7	Suppressor of tumorigenicity 7 protein	St7
-0.0140281	0.93147	0.0308313	P46460;G3UX86;G3UX98	Vesicle-fusing ATPase	Nsf
-0.0142525	0.960899	0.0173221	Q8QZY1	Eukaryotic translation initiation factor 3 subunit L	Eif3l
-0.0145922	0.890522	0.0503551	Q9JLJ2;Q3U367	4-trimethylaminobutyraldehyde dehydrogenase	Aldh9a1
-0.0147334	0.913565	0.0392606	P49769;P49769-2	Presenilin-1;Presenilin-1 NTF subunit;Presenilin-1 CTF subunit;Presenilin-1 CTF12	Psen1
-0.0152279	0.944999	0.0245687	Q8BMF4	Dihydrolipoyllysine-residue acetyltransferase component of pyruvate dehydrogenase complex, mitochondrial	Dlat
-0.0156012	0.935596	0.0289118	Q3UV70;A2AJP9;A8Y5Q0;A2AJQ0	[Pyruvate dehydrogenase [acetyl-transferring]]-phosphatase 1, mitochondrial	Pdp1
-0.0156665	0.87717	0.0569162	Q9CXZ1;E9QPX3	NADH dehydrogenase [ubiquinone] iron-sulfur protein 4, mitochondrial	Ndufs4
-0.0161924	0.950279	0.0221487	Q8BZZ3	NEDD4-like E3 ubiquitin-protein ligase WWP1	Wwp1
-0.0165014	0.788496	0.1032	Q8CFX1;A2A7A7;A2A7A8	GDH/6PGL endoplasmic bifunctional protein;Glucose 1-dehydrogenase;6-phosphogluconolactonase	H6pd
-0.0169233	0.846372	0.0724385	Q9CQA3	Succinate dehydrogenase [ubiquinone] iron-sulfur subunit, mitochondrial	Sdhb
-0.0171849	0.963545	0.0161281	Q8K363;F6ZX28	ATP-dependent RNA helicase DDX18	Ddx18
-0.0174096	0.897009	0.047203	Q9CRY7	Glycerophosphodiester phosphodiesterase domain-containing protein 1	Gdpd1
-0.0177097	0.861674	0.064657	Q8C1Y8	Vacuolar fusion protein CCZ1 homolog	Ccz1
-0.0188943	0.835288	0.078164	Q922Q4	Pyrroline-5-carboxylate reductase 2	Pycr2
-0.0190778	0.930162	0.0314414	E9PY39;Q99LQ7;Q9CZY3;B7ZBY7;Q9D2M8-2;Q9CZY3-2;D3YXL3;B7ZBY6;D3Z6R2;Q9D2M8;D3Z1I3	Transmembrane protein 189	Gm20431;Tmem189
-0.0200395	0.873171	0.0589007	Q3U3J1;P50136	2-oxoisovalerate dehydrogenase subunit alpha, mitochondrial	Bckdha
-0.0203599	0.90204	0.0447742	Q3UMB9	WASH complex subunit 7	Kiaa1033
-0.0207554	0.88593	0.0526004	Q9D8V7;D6RFV4;D3Z5H3	Signal peptidase complex catalytic subunit SEC11C	Sec11c
-0.02106	0.943877	0.0250848	Q8R1S0;D3YW66;D6RG57;F6ZE40	Ubiquinone biosynthesis monooxygenase COQ6	Coq6
-0.0210678	0.920215	0.0361106	Q7JCZ1;P00405	Cytochrome c oxidase subunit 2	mt-Co2;Mtco2
-0.0215423	0.89142	0.0499175	Q99N17;G3UW78;Q3V1F1		Cyp4f16;Cyp4f17;Gm9705
-0.0220022	0.902564	0.0445218	Q9DBW0;H9H9R5	Cytochrome P450 4V2	Cyp4v2
-0.0229842	0.841224	0.0750886	Q9R112;F6ZKZ3;H3BLH2	Sulfide:quinone oxidoreductase, mitochondrial	Sqrdl
-0.0230321	0.932575	0.0303161	Q9D023	Mitochondrial pyruvate carrier 2	Mpc2
-0.0231626	0.931957	0.030604	P97315	Cysteine and glycine-rich protein 1	Csrp1
-0.0233184	0.831022	0.0803876	Q9CR59	Growth arrest and DNA damage-inducible proteins-interacting protein 1	Gadd45gip1
-0.0236826	0.830853	0.080476	Q8BIP0	Aspartate--tRNA ligase, mitochondrial	Dars2
-0.0238332	0.790571	0.102059	P50518;Q9D593	V-type proton ATPase subunit E 1	Atp6v1e1
-0.0239195	0.903595	0.0440263	Q8K3J1	NADH dehydrogenase [ubiquinone] iron-sulfur protein 8, mitochondrial	Ndufs8
-0.023992	0.79828	0.0978445	O35350	Calpain-1 catalytic subunit	Capn1
-0.0245963	0.882209	0.0544286	Q504M2		Pdp2
-0.0246617	0.863617	0.0636786	E0CXC7;Q8CIF6;Q8CIF6-2;F6SV01;F7DF36;F7B6N2	SID1 transmembrane family member 2	Sidt2
-0.0247955	0.956384	0.0193678	D3YWF6;Q7TQI3;D3Z7K0	Ubiquitin thioesterase OTUB1	Otub1
-0.0251064	0.971593	0.0125154	P56393	Cytochrome c oxidase subunit 7B, mitochondrial	Cox7b
-0.0252557	0.814643	0.0890328	Q921G7;Q6PF96	Electron transfer flavoprotein-ubiquinone oxidoreductase, mitochondrial	Etfdh
-0.0252954	0.908368	0.0417383	Q61411;Q61411-2	GTPase HRas;GTPase HRas, N-terminally processed	Hras1
-0.0253848	0.916068	0.0380724	P85094	Isochorismatase domain-containing protein 2A, mitochondrial	Isoc2a
-0.0256752	0.894254	0.0485393	E9Q1G8;O55131;E9Q9F5;P28661-5;P28661-4;Q9DA97;P28661-3;P28661-2;P28661	Septin-7	39326
-0.0257907	0.860253	0.0653737	Q9CR61	NADH dehydrogenase [ubiquinone] 1 beta subcomplex subunit 7	Ndufb7
-0.0258924	0.882718	0.0541781	Q9CQA6	Coiled-coil-helix-coiled-coil-helix domain-containing protein 1	Chchd1
-0.0263915	0.848538	0.0713288	D3Z7P3-2;F6RDM4
-0.0264876	0.901926	0.0448291	Q8C6I2;Q8C6I2-3;Q8C6I2-2	Succinate dehydrogenase assembly factor 2, mitochondrial	Sdhaf2
-0.0268486	0.760412	0.118951	P47738;D3YYF3	Aldehyde dehydrogenase, mitochondrial	Aldh2
-0.0272108	0.897683	0.0468768	D3YZ98;Q6PF93-2;E9QLS6;Q6PF93;E9Q824	Phosphatidylinositol 3-kinase catalytic subunit type 3	Pik3c3
-0.0283446	0.779465	0.108203	P53994;G3UXQ7;G3V022	Ras-related protein Rab-2A	Rab2a
-0.0284829	0.870419	0.0602718	O08528;E9Q5B5;E9Q9M6	Hexokinase-2	Hk2
-0.0285569	0.802394	0.0956124	O88587-2;O88587;D3Z227	Catechol O-methyltransferase	Comt
-0.0292799	0.779724	0.108059	D3YUM1;Q91YT0;D3Z1U9;D3Z0K1;D3YXX5;D6RG60	NADH dehydrogenase [ubiquinone] flavoprotein 1, mitochondrial	Ndufv1
-0.0296749	0.844407	0.0734481	O09111	NADH dehydrogenase [ubiquinone] 1 beta subcomplex subunit 11, mitochondrial	Ndufb11
-0.0300972	0.835667	0.0779666	P97300-1;P97300;H3BIX4;P97300-3;P97300-4;H3BKA7	Neuroplastin	Nptn
-0.0305615	0.85761	0.06671	Q8CI59;Q8CI59-2;E9QN92;D3YTP0	Metalloreductase STEAP3	Steap3
-0.0311077	0.811733	0.0905866	Q9CPQ3	Mitochondrial import receptor subunit TOM22 homolog	Tomm22
-0.0317959	0.899522	0.0459884	Q8K1J6;Q8K1J6-2	CCA tRNA nucleotidyltransferase 1, mitochondrial	Trnt1
-0.0323277	0.722426	0.141207	Q8BIJ6;E9PWN2;E9PWN3	Isoleucine--tRNA ligase, mitochondrial	Iars2
-0.0323407	0.849705	0.0707319	P14211	Calreticulin	Calr
-0.0324407	0.915471	0.0383553	Q8R5L1;O35658	Complement component 1 Q subcomponent-binding protein, mitochondrial	C1qbp
-0.0325605	0.867802	0.0615792	Q8CD26;F7BUQ6	Solute carrier family 35 member E1	Slc35e1
-0.0327424	0.702936	0.153084	Q8BJ48;D3Z6C9	N-acetylglucosamine-1-phosphodiester alpha-N-acetylglucosaminidase	Nagpa
-0.0329833	0.835026	0.0782998	Q8BWG9	Calcium release-activated calcium channel protein 1	Orai1
-0.0331778	0.809804	0.0916202	Q9CQV8-2;Q9CQV8;A2A5N1	14-3-3 protein beta/alpha;14-3-3 protein beta/alpha, N-terminally processed	Ywhab
-0.0333592	0.865931	0.0625166	Q9CQL6	39S ribosomal protein L35, mitochondrial	Mrpl35
-0.0335391	0.903802	0.0439269	Q3U1Z5-2;Q3U1Z5;G3UYL4	G-protein-signaling modulator 3	Gpsm3
-0.0340282	0.778076	0.108978	Q3TVP5;Q3TVP5-2	Protein FAM105A	Fam105a
-0.0341065	0.758822	0.11986	Q9DAU1;Q9DAU1-2;B0V2V1	Protein canopy homolog 3	Cnpy3
-0.0342451	0.845778	0.0727434	Q9QYI4;Q8C4C9;D6RHR9	DnaJ homolog subfamily B member 12	Dnajb12
-0.0344233	0.881975	0.0545439	Q9CPQ8;F2Z452;J3QNM7	ATP synthase subunit g, mitochondrial	Atp5l
-0.034437	0.759405	0.119527	P97478;Q3TYT1	Ubiquinone biosynthesis protein COQ7 homolog	Coq7
-0.0354793	0.847924	0.0716431	Q8R2E9	ERO1-like protein beta	Ero1lb
-0.0356343	0.840849	0.0752822	Q99JI6	Ras-related protein Rap-1b	Rap1b
-0.0360287	0.833652	0.0790155	Q5SXY1;Q5SXY1-2;Q5SXY1-3	Cytospin-B	Specc1
-0.0360319	0.832946	0.0793833	Q91Z50;P39749	Flap endonuclease 1	Fen1
-0.036149	0.705202	0.151687	Q91YH5;E9PYT3;Q91YH5-2	Atlastin-3	Atl3
-0.0362326	0.827317	0.0823282	Q8VDK1-2;Q8VDK1;D3YY53;D3Z3I3;D3Z2Y2	Nitrilase homolog 1	Nit1
-0.0362982	0.764712	0.116502	O35963;P97950	Ras-related protein Rab-33B	Rab33b
-0.0363402	0.766135	0.115695	Q8BFP9	[Pyruvate dehydrogenase [lipoamide]] kinase isozyme 1, mitochondrial	Pdk1
-0.0367216	0.767067	0.115166	Q9CPQ1;D3Z6E1	Cytochrome c oxidase subunit 6C	Cox6c
-0.0368102	0.678268	0.168598	Q91WD5;D3YXT0;F6RJ83	NADH dehydrogenase [ubiquinone] iron-sulfur protein 2, mitochondrial	Ndufs2
-0.0368507	0.840163	0.0756367	Q8BLN5;F7BJL0	Lanosterol synthase	Lss
-0.0373538	0.820299	0.0860281	Q9D1N9;Q9D1N9-2	39S ribosomal protein L21, mitochondrial	Mrpl21
-0.037605	0.952163	0.0212885	Q9CPW5	Translocon-associated protein subunit beta	Ssr2
-0.0386831	0.783648	0.105879	Q791V5;A2AFW6;Q9D050;D6RCZ1	Mitochondrial carrier homolog 2	Mtch2
-0.0393307	0.814863	0.0889154	Q9D8S4	Oligoribonuclease, mitochondrial	Rexo2
-0.0396943	0.79538	0.0994256	Q7JCZ0;P03930	ATP synthase protein 8	mt-Atp8;Mtatp8
-0.0401936	0.847141	0.0720441	Q8R1V4;Q5SVW9	Transmembrane emp24 domain-containing protein 4	Tmed4
-0.0407723	0.66857	0.174853	Q99M08	Uncharacterized protein C4orf3 homolog
-0.0409554	0.766439	0.115523	P98195-2;D3YV00;P98195;Q8C4G3;Q8C288;O70228;A2AQC3	Probable phospholipid-transporting ATPase IIB	Atp9b
-0.0416112	0.789968	0.10239	Q9CQV4;Q9CQV4-2	Protein FAM134C	Fam134c
-0.0416142	0.693574	0.158907	Q06185;Q8BTB6	ATP synthase subunit e, mitochondrial	Atp5i;Atp5k
-0.0417696	0.766562	0.115453	Q9CZ42-3;J3QMM7;Q9CZ42;K3W4M4;Q9CZ42-2;J3QN06;J3QPU6	ATP-dependent (S)-NAD(P)H-hydrate dehydratase	Carkd
-0.0419318	0.702748	0.153201	Q6NWW9	Fibronectin type III domain-containing protein 3B	Fndc3b
-0.0424538	0.89158	0.0498397	O35988	Syndecan-4	Sdc4
-0.0425461	0.66533	0.176963	Q8K0D5;E0CXN8	Elongation factor G, mitochondrial	Gfm1
-0.0441543	0.73146	0.135809	Q9QY76;Q8BH80	Vesicle-associated membrane protein-associated protein B	Vapb
-0.0441757	0.756592	0.121138	Q9JLR1	Protein transport protein Sec61 subunit alpha isoform 2	Sec61a2
-0.0444052	0.915116	0.038524	Q9D906	Ubiquitin-like modifier-activating enzyme ATG7	Atg7
-0.0444594	0.892204	0.0495358	Q3UW53;E9PYV4;D3Z233;D3YYZ9	Protein Niban	Fam129a
-0.045104	0.680286	0.167308	P67778;Q5SQG5	Prohibitin	Phb
-0.0451209	0.757946	0.120362	Q60931;J3QPE8;J3QMG3	Voltage-dependent anion-selective channel protein 3	Vdac3;Vdac3-ps1
-0.045223	0.740552	0.130445	Q3TL44	NLR family member X1	Nlrx1
-0.0458173	0.881991	0.0545361	Q9QYF9;Q8VCV2;Q8CBD0	Protein NDRG3	Ndrg3
-0.0467822	0.829592	0.0811355	E9Q705;Q8CEI1;E9PX89	BolA-like protein 3	Bola3
-0.0479273	0.764452	0.11665	A2A5R2;F6YCJ0	Brefeldin A-inhibited guanine nucleotide-exchange protein 2	Arfgef2
-0.0486404	0.761466	0.118349	P09103;E9Q8G8	Protein disulfide-isomerase	P4hb
-0.0486503	0.738167	0.131845	Q921X9	Protein disulfide-isomerase A5	Pdia5
-0.0488825	0.729679	0.136868	O88736;Q8C5N9	3-keto-steroid reductase	Hsd17b7
-0.0490216	0.914525	0.0388043	Q32NY4-2;Q32NY4	Metal transporter CNNM3	Cnnm3
-0.0491825	0.798902	0.0975067	Q9CPU2	NADH dehydrogenase [ubiquinone] 1 beta subcomplex subunit 2, mitochondrial	Ndufb2
-0.0501492	0.778017	0.109011	A2A9I0;O35166	Golgi SNAP receptor complex member 2	Gosr2
-0.0501654	0.758107	0.120269	Q8CE80;P51125-2;P51125-6;P51125;P51125-3;P51125-7	Calpastatin	Cast
-0.0505658	0.78523	0.105003	P97823;J3QK48;P97823-2;J3QP56;D3YUG4;D3Z111;D3Z269	Acyl-protein thioesterase 1	Lypla1
-0.0511019	0.654107	0.184351	Q9CQ06	39S ribosomal protein L24, mitochondrial	Mrpl24
-0.053061	0.76965	0.113707	P42208;E9Q3V6;F6WYM0;D3YYB1;D3Z3C0;D3Z1S1;F6UKN5;D3YZU7;G3UYQ0;D3YV76	Septin-2	37500
-0.0539868	0.723108	0.140797	P62814;Q91YH6	V-type proton ATPase subunit B, brain isoform	Atp6v1b2
-0.0542071	0.451006	0.345818	Q8K411-2;Q8K411;Q8K411-3	Presequence protease, mitochondrial	Pitrm1
-0.0542675	0.639685	0.194034	P45952;D6RFD7;D3Z2A5	Medium-chain specific acyl-CoA dehydrogenase, mitochondrial	Acadm
-0.0556504	0.586876	0.231454	Q91VA6;F6SQH7	Polymerase delta-interacting protein 2	Poldip2
-0.0559144	0.809786	0.0916296	Q6YGZ1;D3Z3C3	Heparanase;Heparanase 8 kDa subunit;Heparanase 50 kDa subunit	Hpse
-0.056191	0.806264	0.0935225	Q9D0Q7;F6QAU7	39S ribosomal protein L45, mitochondrial	Mrpl45
-0.057478	0.621811	0.206341	Q9QYC0-2;E9Q1K3;F8WHZ9;F8WGR0;Q9QYC0;F6RDR0;F6V4G5;D3Z0T1	Alpha-adducin	Add1
-0.0583158	0.66597	0.176545	Q80UG5-2;A2A6U3;Q80UG5-3;Q80UG5;A2A6U5;A8Y5D3	Septin-9	40057
-0.0583167	0.765542	0.116031	Q9D8P4;H3BJT9;H3BIZ3;Q9D8P4-2	39S ribosomal protein L17, mitochondrial	Mrpl17
-0.0583303	0.718996	0.143274	Q8R3H7	Heparan sulfate 2-O-sulfotransferase 1	Hs2st1
-0.0584208	0.81219	0.0903421	Q80W54;I7HIP5	CAAX prenyl protease 1 homolog	Zmpste24
-0.059362	0.83627	0.0776536	Q9JIZ9;Q5F284	Phospholipid scramblase 3	Plscr3
-0.0594694	0.402104	0.395661	P63038;P63038-2;D3Z2F2;D3Z7J9	60 kDa heat shock protein, mitochondrial	Hspd1
-0.0595138	0.620338	0.207372	Q8BK30	NADH dehydrogenase [ubiquinone] flavoprotein 3, mitochondrial	Ndufv3
-0.0596934	0.645691	0.189975	Q9D855;Q9CQB4	Cytochrome b-c1 complex subunit 7	Uqcrb
-0.0598594	0.744619	0.128066	Q8BMD6;Q8BMD6-2;D6RHS9	Transmembrane protein 260	Tmem260
-0.0615948	0.793388	0.100514	E9QNG1;Q9Z0R6;Q9Z0R6-2;F6ZX53;F6TCC6;F6U8U1	Intersectin-2	Itsn2
-0.0616135	0.830426	0.0806989	Q9JJ06	Glycoprotein-N-acetylgalactosamine 3-beta-galactosyltransferase 1	C1galt1
-0.0617992	0.867884	0.0615384	Q9R1W5	Calcitonin gene-related peptide type 1 receptor	Calcrl
-0.0621474	0.657351	0.182203	P18181;F8WHM0	CD48 antigen	Cd48
-0.0623828	0.74135	0.129977	O55242;O55242-2	Sigma non-opioid intracellular receptor 1	Sigmar1
-0.0625245	0.541178	0.26666	P50516;P50516-2;D3Z1B9;D3YWH3;D3YZ23	V-type proton ATPase catalytic subunit A	Atp6v1a
-0.0629223	0.767594	0.114868	Q9JKB3-2;Q9JKB3	Y-box-binding protein 3	Ybx3
-0.0635016	0.686551	0.163327	D3Z645;Q9QZ88;Q9QZ88-2;D3YYD5;D3YW98	Vacuolar protein sorting-associated protein 29	Vps29
-0.0636734	0.629439	0.201046	Q8C5H8-2;Q8C5H8-3;Q8C5H8-4;Q8C5H8	NAD kinase domain-containing protein 1, mitochondrial	Nadkd1
-0.0638248	0.591593	0.227977	Q8CGK3	Lon protease homolog, mitochondrial	Lonp1
-0.0638571	0.705144	0.151722	P35276;D3YWL1;D3YW33;P62823	Ras-related protein Rab-3D	Rab3d
-0.0640295	0.779641	0.108105	Q64704-2;Q8R1B7;Q64704;Q64704-6;Q64704-5;Q64704-3;Q64704-4	Syntaxin-3	Stx3
-0.0642553	0.808423	0.0923614	Q810S1;F6SD17;D6RIL8	Coiled-coil domain-containing protein 109B	Ccdc109b
-0.0646228	0.774371	0.111051	P51829;P84309;P84309-2	Adenylate cyclase type 7	Adcy7
-0.0654787	0.65273	0.185266	Q91XL3;D3YUF9	UDP-glucuronic acid decarboxylase 1	Uxs1
-0.0655104	0.662907	0.178547	Q05816	Fatty acid-binding protein, epidermal	Fabp5
-0.065758	0.602175	0.220278	Q7TMF3;F6RBR6	NADH dehydrogenase [ubiquinone] 1 alpha subcomplex subunit 12	Ndufa12
-0.0660587	0.465143	0.332414	Q91VM9;D3Z636;Q91VM9-2;D3Z096;G8JL76	Inorganic pyrophosphatase 2, mitochondrial	Ppa2
-0.0661098	0.84084	0.0752864	P99028	Cytochrome b-c1 complex subunit 6, mitochondrial	Uqcrh
-0.066881	0.782857	0.106318	G3UZ34;O08810;A2AH85	116 kDa U5 small nuclear ribonucleoprotein component	Eftud2
-0.0671856	0.584873	0.232938	Q9CQZ6	NADH dehydrogenase [ubiquinone] 1 beta subcomplex subunit 3	Ndufb3
-0.0679171	0.614014	0.211821	Q8CIV2;Q8CIV2-2;F6RN19	Membralin	Tmem259
-0.0680186	0.824427	0.0838478	Q8CIE6;F8WHL2;F6XJN3	Coatomer subunit alpha;Xenin;Proxenin	Copa
-0.0682067	0.680178	0.167377	Q99JR1	Sideroflexin-1	Sfxn1
-0.068771	0.677907	0.16883	Q9CQV5	28S ribosomal protein S24, mitochondrial	Mrps24
-0.0690756	0.759455	0.119498	O89110	Caspase-8;Caspase-8 subunit p18;Caspase-8 subunit p10	Casp8
-0.0693868	0.652522	0.185405	P97742	Carnitine O-palmitoyltransferase 1, liver isoform	Cpt1a
-0.0695867	0.720198	0.142548	Q9D3D9;D3Z7S4	ATP synthase subunit delta, mitochondrial	Atp5d
-0.0696082	0.551383	0.258547	G5E850;P56395;E0CY88	Cytochrome b5	Cyb5;Cyb5a
-0.0700166	0.831827	0.079967	Q64310;E0CXD9;F7CH13	Surfeit locus protein 4	Surf4
-0.0702957	0.706939	0.150618	Q9DCR2	AP-3 complex subunit sigma-1	Ap3s1
-0.0705444	0.66652	0.176187	Q9D270	Probable palmitoyltransferase ZDHHC21	Zdhhc21
-0.0711938	0.527305	0.277938	Q8JZN7;H3BKJ1;H3BKL2;H3BL14	Mitochondrial Rho GTPase 2	Rhot2
-0.072017	0.704381	0.152192	B1B1D8;Q9D773;B1B1D7	39S ribosomal protein L2, mitochondrial	Mrpl2
-0.0726807	0.613329	0.212307	Q9D920;E9Q2W8	Loss of heterozygosity 12 chromosomal region 1 protein homolog	Loh12cr1
-0.0729048	0.586936	0.231409	Q9WV55	Vesicle-associated membrane protein-associated protein A	Vapa
-0.0742032	0.422367	0.37431	Q8C6I5;Q9Z1J3-2;Q9Z1J3;F7CZD1;F6TXD3;A6QRH3	Cysteine desulfurase, mitochondrial	Nfs1
-0.0745364	0.558202	0.253209	P35821	Tyrosine-protein phosphatase non-receptor type 1	Ptpn1
-0.0746164	0.810888	0.0910391	Q3UJB0		Sf3b2
-0.0751619	0.722924	0.140908	Q80T06;Q91VK2;P57776;P57776-3;E9QN08;D3YY68;D3YUQ9	Elongation factor 1-delta	Eef1d
-0.0754443	0.503262	0.298206	Q9DB77	Cytochrome b-c1 complex subunit 2, mitochondrial	Uqcrc2
-0.0754559	0.621958	0.206239	P61222	ATP-binding cassette sub-family E member 1	Abce1
-0.0755	0.539313	0.268159	O88441	Metaxin-2	Mtx2
-0.0776209	0.415806	0.381109	Q9Z2I0	LETM1 and EF-hand domain-containing protein 1, mitochondrial	Letm1
-0.0776868	0.464119	0.333371	Q9CPY7-2;Q9CPY7	Cytosol aminopeptidase	Lap3
-0.0778901	0.626042	0.203396	P70336;F8VPK5;P70336-2	Rho-associated protein kinase 2	Rock2
[truncated: 1,038 more rows]

## Sheet: IFNb qualitative changer
identified in 4/4 IFNβ-treated samples but in ≤ 1/6 untreated samples
average LFQ intensity in IFNβ treated samples	protein IDs (uniprot identifier)	Protein name	Gene names
16598800	Q62293		Tgtp (Irgb6)
13175000	Q9QZ85	Interferon-inducible GTPase 1	Iigp1 (Irga6)
12938250	P12804	Fibroleukin	Fgl2
12902875	Q64345	Interferon-induced protein with tetratricopeptide repeats 3	Ifit3
7841625	Q61107	Guanylate-binding protein 3	Gbp3
7475625	D3YW23;P17515	C-X-C motif chemokine 10	Cxcl10
5989575	Q6GTM0;Q64112	Interferon-induced protein with tetratricopeptide repeats 2	Ifit2
5666550	Q9JL16-2;Q9JL16	Interferon-stimulated gene 20 kDa protein	Isg20
5203975	Q8CFB4	Guanylate-binding protein 5	Gbp5
4517625	Q3UDK1-2;Q3UDK1	TRAF-type zinc finger domain-containing protein 1	Trafd1
4244000	Q9EP73	Programmed cell death 1 ligand 1	Cd274
4213350	Q8C9E8	Protein FAM26F	Fam26f
3673150	Q3U5N6;Q9D3F6;D3YZH6		Ms4a4c
3070475	P29387	Guanine nucleotide-binding protein subunit beta-4	Gnb4
2889700	P16460;J3QNG0	Argininosuccinate synthase	Ass1;Gm5424
2798125	Q8HWB2		H2-Q4
2789525	Q8CGE8	Interferon-activable protein 205-A	Ifi205a
2222975	Q9DBU3	Serine/threonine-protein kinase RIO3	Riok3
2201850	A6H5X4-3;A6H5X4;A6H5X4-2	PHD finger protein 11	Phf11
1926595	L7N1X8;Q000W5		Gbp6;Gbp10
1599375	Q9D780	SLAM family member 9	Slamf9
1422300	F2Z461	E3 ISG15--protein ligase Herc6	Herc6
1394725	Q99J72-3;H3BJQ3;Q99J72-4;H3BKE5;Q99J72-2;Q99J72;E9QMH1;H3BJ44;H3BJL0;Q3TI69	DNA dC->dU-editing enzyme APOBEC-3	Apobec3
1277650	Q3U7K7;Q62191	E3 ubiquitin-protein ligase TRIM21	Trim21
1232740	P15533	Tripartite motif-containing protein 30A	Trim30a
1.07706e+06	P42669	Transcriptional activator protein Pur-alpha	Pura
963985	Q6QX36;D6RJI6;A6XA72		B430306N03Rik
840718	Q9DBC3;E0CXC2	Cap-specific mRNA (nucleoside-2-O-)-methyltransferase 1	Ftsjd2;Rnf8
819240	Q99KN2;G3UYR5	Probable cytosolic iron-sulfur protein assembly protein CIAO1	Ciao1
814872	H3BJX3;Q6XJV4;Q6XJV6	Cell surface glycoprotein CD200 receptor 4;Cell surface glycoprotein CD200 receptor 2	Cd200r4;Cd200r1l
811220	B4XVQ1		Phf11b
799875	Q99PG2;Q99PG2-2	Opioid growth factor receptor	Ogfr
788600	Q8BFY6	Peflin	Pef1
768878	Q8R3L5-2;D3YXA8;Q8R3L5	Solute carrier organic anion transporter family member 3A1	Slco3a1
758185	Q9WTV6	Ubl carboxyl-terminal hydrolase 18	Usp18
721945	Q8R007-2;Q8R007;F6W9D6	Poliovirus receptor-related protein 4	Pvrl4
704920	Q9CR86;J3QPI4	Calcium-regulated heat stable protein 1	Carhsp1;Gm9791
688885	Q8CI94	Glycogen phosphorylase, brain form	Pygb
606322	Q91YZ8;D3Z5M2;A3KFU5;A3KFU8;Q6PHQ9		Pabpc4;Gm10110
533440	Q61288	Serine/threonine-protein kinase receptor R3	Acvrl1
511358	Q60837	Interleukin-12 receptor subunit beta-1	Il12rb1
501768	Q8R310-2;Q8R310	Transmembrane and coiled-coil domains protein 3	Tmcc3
496022	G3UY25;P50592	Tumor necrosis factor ligand superfamily member 10	Tnfsf10
477208	Q7TN98-4;Q7TN98-5;Q7TN98-3;Q5SU48;Q7TN98-2;Q7TN98;Q5SU47	Cytoplasmic polyadenylation element-binding protein 4	Cpeb4
475168	Q922R0;B1AVU1	cAMP-dependent protein kinase catalytic subunit PRKX	Prkx
456565	Q8R3C0;H9KV04	Mini-chromosome maintenance complex-binding protein	Mcmbp
362232	D3Z5S8		Fam46a
355830	Q8R2V5	Arf-GAP with dual PH domain-containing protein 2	Adap2
355788	P59326;A2AWN8	YTH domain family protein 1	Ythdf1
343972	Q9JII5-2;Q9JII5;Q3UGB5;D3Z4J1	DAZ-associated protein 1	Dazap1
332620	Q8CJG0	Protein argonaute-2	Eif2c2
319265	P49717	DNA replication licensing factor MCM4	Mcm4
316692	Q80VI1	E3 ubiquitin-protein ligase TRIM56	Trim56
312162	Q99J64	RNA-binding protein 43	Rbm43
302455	Q8CFB8;Q3ULW8		Parp3
277992	Q8BV66	Interferon-induced protein 44	Ifi44
263098	Q91YR7	Pre-mRNA-processing factor 6	Prpf6
263028	Q61508;Q61508-2;F8WI14	Extracellular matrix protein 1	Ecm1
248462	P21447	Multidrug resistance protein 1A	Abcb1a
244775	D3Z061;Q8C7R4	Ubiquitin-like modifier-activating enzyme 6	Uba6
243790	Q05915	GTP cyclohydrolase 1	Gch1
199785	O70469	Docking protein 2	Dok2
167015	P58801	Receptor-interacting serine/threonine-protein kinase 2	Ripk2

## Sheet: IFNg vs. untreated
IFNγ/untreated LFQ intensity ratio [log2]	p-value	p-value [-log10]	Protein ID (uniprot identifier)	Protein name	Gene name
9.89385	0.000939355	3.02717	Q9Z0E6;Q01514;E9Q2N7;A4UUI2	Interferon-induced guanylate-binding protein 2	Gbp2
6.98514	0.00250654	2.60092	Q8CBB9;D6RJ49	Radical S-adenosyl methionine domain-containing protein 2	Rsad2
6.55578	0.000163863	3.78552	Q64282	Interferon-induced protein with tetratricopeptide repeats 1	Ifit1
6.03854	1.69409e-09	8.77106	P14483;P06346;P06344;P06345;P06343	H-2 class II histocompatibility antigen, A beta chain;H-2 class II histocompatibility antigen, A-F beta chain;H-2 class II histocompatibility antigen, A-U beta chain;H-2 class II histocompatibility antigen, A-S beta chain;H-2 class II histocompatibility antigen, A-K beta chain	H2-Ab1
5.57719	5.96475e-06	5.22441	P54987	Immune-responsive gene 1 protein	Irg1
5.51794	0.0375954	1.42487	Q05769	Prostaglandin G/H synthase 2	Ptgs2
5.5056	4.39524e-05	4.35702	Q60710;F8WJE0	SAM domain and HD domain-containing protein 1	Samhd1
5.16428	3.16824e-06	5.49918	P04441-2		Cd74
4.75065	0.00120604	2.91864	Q810Q5;A2AK37	Normal mucosa of esophagus-specific gene 1 protein	Nmes1
4.63747	0.00669639	2.17416	P27512;P27512-5;P27512-4;P27512-3;P27512-2;A2A5L7	Tumor necrosis factor receptor superfamily member 5	Cd40
4.45773	0.00926699	2.03306	Q8VI94	2-5-oligoadenylate synthase-like protein 1	Oasl1
4.45164	4.65245e-08	7.33232	P14438;P14434;G3UWR9;P14437;P14436;P14435;P23150;P04228;P01910;P04227	H-2 class II histocompatibility antigen, A-U alpha chain;H-2 class II histocompatibility antigen, A-B alpha chain;H-2 class II histocompatibility antigen, A-S alpha chain;H-2 class II histocompatibility antigen, A-R alpha chain;H-2 class II histocompatibility antigen, A-F alpha chain;H-2 class II histocompatibility antigen, I-E alpha chain;H-2 class II histocompatibility antigen, A-D alpha chain;…	H2-Aa
4.3433	0.00923172	2.03472	Q91Z40		Gbp7
4.11077	0.0100173	1.99925	P37217	Early activation antigen CD69	Cd69
3.91453	1.68815e-08	7.77259	Q8CBA2;F8WH72	Schlafen family member 5	Slfn5
3.81067	0.000866734	3.06211	P01027;P01027-2;H3BL60;H3BKW9	Complement C3;Complement C3 beta chain;Complement C3 alpha chain;C3a anaphylatoxin;Acylation stimulating protein;Complement C3b alpha chain;Complement C3c alpha chain fragment 1;Complement C3dg fragment;Complement C3g fragment;Complement C3d fragment;Complement C3f fragment;Complement C3c alpha chain fragment 2	C3
3.66973	8.94712e-06	5.04832	Q91YX0	Protein THEMIS2	Themis2
3.65158	1.21041e-08	7.91707	Q9DCE9		Igtp
3.50828	0.000506078	3.29578	Q3UYC0;Q3UYC0-2;E0CYP3;Q8BU27-2;Q8BU27;F8WGF9;E9Q2I3;Q149T7	Protein phosphatase 1H	Ppm1h
3.45279	3.8843e-08	7.41069	P21981;G3UXE8	Protein-glutamine gamma-glutamyltransferase 2	Tgm2
3.39487	0.00115096	2.93894	P42082-2;P42082;D3Z363	T-lymphocyte activation antigen CD86	Cd86
3.32656	0.000196544	3.70654	Q64339	Ubiquitin-like protein ISG15	Isg15
3.26666	6.51128e-08	7.18633	P06339;F6VXI7;H3BJA9;H3BK58;F6TIX5;Q9BCZ1;A7VMS3;Q31615;F6T1I5;P14432;G3UZ37	H-2 class I histocompatibility antigen, D-37 alpha chain	H2-T23
3.22775	0.0459489	1.33773	O78196;P04230;P04231;P20040;P18468;P18469;P01915	H-2 class II histocompatibility antigen, E-B beta chain;H-2 class II histocompatibility antigen, E-S beta chain;H-2 class II histocompatibility antigen, E-Q beta chain;H-2 class II histocompatibility antigen, I-A beta chain	H2-Eb1
3.21295	6.19301e-06	5.2081	Q5SVP0;Q5SVP2;Q8CB10;Q5SVN9		9930111J21Rik1
3.17303	0.000155535	3.80817	Q6Q899;A2AP29;Q6Q899-2;Q6Q899-3;Q6Q899-4	Probable ATP-dependent RNA helicase DDX58	Ddx58
3.10011	2.42712e-05	4.61491	E9PZ21;Q91W59-2;Q91W59-3;Q91W59;G3UZJ9;Q8BWL5-4;Q8BWL5-6;Q8BWL5-3;Q8BWL5-2;Q8BWL5;Q8BWL5-5;E9Q7G6;Q8VC70	RNA-binding motif, single-stranded-interacting protein 1	Rbms1
3.06351	2.22339e-06	5.65298	Q8BMJ2	Leucine--tRNA ligase, cytoplasmic	Lars
3.00588	7.53624e-09	8.12285	Q91W50	Cold shock domain-containing protein E1	Csde1
3.0023	3.83168e-05	4.41661	Q8BV49;Q504N7;E9PVL3;E9QL87;Q504N7-2	Pyrin and HIN domain-containing protein 1;Pyrin and HIN domain-containing protein 1-like	Pyhin1;BC094916
2.9804	9.84663e-08	7.00671	Q99JZ4;P36536	GTP-binding protein SAR1a	Sar1a
2.95306	1.11462e-05	4.95287	Q8CFQ9;P56959;G3UXT7;G3UZD2;Q91VQ2	RNA-binding protein FUS	Fus
2.91916	1.68407e-06	5.77364	Q9CX86	Heterogeneous nuclear ribonucleoprotein A0	Hnrnpa0
2.84715	7.18489e-05	4.14358	Q9D0I9	Arginine--tRNA ligase, cytoplasmic	Rars
2.84285	3.99249e-07	6.39876	Q8CG50;Q91Z34;D3Z444	Ras-related protein Rab-43	Rab43
2.84115	2.72121e-05	4.56524	Q9Z2F2;D3Z324;D3Z352;F6Y3A6	2-5-oligoadenylate synthase-like protein 2	Oasl2
2.82541	1.9838e-05	4.7025	P50543	Protein S100-A11	S100a11
2.80396	0.0119457	1.92279	Q8BVK9	Sp110 nuclear body protein	Sp110
2.79463	0.000855344	3.06786	Q8BU30;E9Q866	Isoleucine--tRNA ligase, cytoplasmic	Iars
2.7777	4.21233e-12	11.3755	Q9Z1M2		Irgm2
2.75199	0.0309069	1.50994	E9QAM5;A2AS03;A2AS05		Helz2
2.74216	1.71731e-05	4.76515	Q8BHK6;Q8BHK6-4;Q8BHK6-2;Q8BHK6-3	SLAM family member 7	Slamf7
2.70764	9.46273e-05	4.02398	Q9QXJ2;E9QJX9		Stat2
2.66915	2.90891e-05	4.53627	Q08619	Interferon-activable protein 205-B	Ifi205b
2.63467	6.76007e-09	8.17005	Q8BL97-3;Q8BL97-4;Q8BL97-2;Q8BL97	Serine/arginine-rich splicing factor 7	Srsf7
2.61442	1.53883e-08	7.81281	Q9EQU3	Toll-like receptor 9	Tlr9
2.57137	5.3724e-06	5.26983	P25206	DNA replication licensing factor MCM3	Mcm3
2.49795	1.0091e-06	5.99607	P13597-2;P13597	Intercellular adhesion molecule 1	Icam1
2.49152	1.99824e-06	5.69935	Q9DBX5;P47713	Cytosolic phospholipase A2;Phospholipase A2;Lysophospholipase	Pla2g4a
2.4801	0.00292333	2.53412	Q31621;P28078	Class II histocompatibility antigen, M alpha chain	H2-DMa
2.46581	2.32873e-07	6.63288	Q8VD31	Tapasin-related protein	Tapbpl
2.46549	2.02493e-07	6.69359	P24547	Inosine-5-monophosphate dehydrogenase 2	Impdh2
2.46358	2.14269e-07	6.66904	Q6PFQ7;Q6PFQ7-2;F6WTE9;F6W8M5	Ras GTPase-activating protein 4	Rasa4
2.4479	3.69701e-06	5.43215	Q52KC3;P49718	DNA replication licensing factor MCM5	Mcm5
2.44092	5.22864e-05	4.28161	Q8CGC7	Bifunctional glutamate/proline--tRNA ligase;Glutamate--tRNA ligase;Proline--tRNA ligase	Eprs
2.41985	0.00177331	2.75122	Q8R151;A2A5R6;A2A5R5;A2A5R4	NFX1-type zinc finger-containing protein 1	Znfx1
2.41551	2.16272e-07	6.665	Q61635		Ifi47
2.40753	0.00709302	2.14917	Q99MU3;Q99MU3-2;Q99MU3-5;Q99MU3-4;Q99MU3-3	Double-stranded RNA-specific adenosine deaminase	Adar
2.38201	8.62812e-07	6.06408	P12382	6-phosphofructokinase, liver type	Pfkl
2.37732	9.10597e-10	9.04067	Q9R233-2;Q9R233;Q3TCU5;G3UZZ2;G3UWL0	Tapasin	Tapbp
2.36343	0.00126462	2.89804	Q99K48;Q99K48-2	Non-POU domain-containing octamer-binding protein	Nono
2.34634	2.58852e-09	8.58695	Q80SU7	Interferon-induced very large GTPase 1	Gvin1
2.33566	3.26138e-05	4.4866	Q3U5Q7	UMP-CMP kinase 2, mitochondrial	Cmpk2
2.32967	0.000500012	3.30102	Q8R5F7;Q8R5F7-2	Interferon-induced helicase C domain-containing protein 1	Ifih1
2.3126	3.25603e-06	5.48731	Q8C3V4;P42225	Signal transducer and activator of transcription 1	Stat1
2.30806	5.75837e-06	5.2397	P07091;D3YUT9	Protein S100-A4	S100a4
2.29238	2.03477e-08	7.69149	P29341;Q9D4E6;Q62029;A2A5N3;F6ZAX1;Q8C7D3;REV__D3Z2P2;REV__Q61362	Polyadenylate-binding protein 1	Pabpc1
2.29006	3.72392e-05	4.429	Q61881;D3Z6N3;D3Z335;D3Z0J6;D3Z2K9	DNA replication licensing factor MCM7	Mcm7
2.25425	1.3029e-05	4.88509	Q9CQR2	40S ribosomal protein S21	Rps21
2.24561	5.84752e-06	5.23303	Q07076	Annexin A7	Anxa7
2.24555	5.73786e-05	4.24125	D3YXZ5;Q91WT8;Q91WT8-2;D3Z113;Q5YD48-3;P86049;Q5YD48-2;Q5YD48	RNA-binding protein 47	Rbm47
2.22293	6.14082e-07	6.21177	Q31094;P35737;Q31099;F7AD18	Class II histocompatibility antigen, M beta 1 chain	H2-DMb1;H2-DMb2
2.21007	1.21357e-08	7.91593	P16858;M0QWZ0;F8WJL5;D3YYI5;D3YU05;D3Z0Z9;F6QXU4;F6UT49;Q64467	Glyceraldehyde-3-phosphate dehydrogenase	Gapdh;Gm7293;Gm6316
2.20047	0.00013503	3.86957	O88627;A2AWR5;E9PXX9	Sodium/nucleoside cotransporter 2	Slc28a2;Gm14085
2.18807	3.77484e-06	5.4231	P01887	Beta-2-microglobulin	B2m
2.17489	6.05666e-05	4.21777	Q8R2Q8	Bone marrow stromal antigen 2	Bst2
2.17427	0.0238362	1.62276	P31230;Q3UZG4	Aminoacyl tRNA synthase complex-interacting multifunctional protein 1;Endothelial monocyte-activating polypeptide 2	Aimp1
2.15757	9.59501e-08	7.01795	P10107	Annexin A1	Anxa1
2.15189	3.79762e-06	5.42049	E9Q7H5;B2RXM2;Q8BG05-2;J3QNY1		Gm8991;Gm6793;Gm9242
2.13695	0.000707824	3.15007	P49312;J3QK72;Q5EBP8;P49312-2	Heterogeneous nuclear ribonucleoprotein A1	Hnrnpa1;Gm7729
2.13667	5.93537e-07	6.22655	P14206;D3YTT7	40S ribosomal protein SA	Rpsa;Rpsa-ps10
2.13217	1.25929e-07	6.89988	Q3UIR3;Q3UIR3-2	E3 ubiquitin-protein ligase DTX3L	Dtx3l
2.11762	2.29517e-07	6.63918	Q3TBT3;Q3TBT3-3;Q3TBT3-2	Stimulator of interferon genes protein	Tmem173
2.0789	1.13311e-07	6.94573	P97429;D3Z0S1;F7ANV6	Annexin A4;Annexin	Anxa4
2.07701	0.0466633	1.33102	Q8R010;Q8R3V2	Aminoacyl tRNA synthase complex-interacting multifunctional protein 2	Aimp2
2.06765	6.34249e-06	5.19774	O88829-2;O88829	Lactosylceramide alpha-2,3-sialyltransferase	St3gal5
2.06041	2.15164e-06	5.66723	Q9JKP5;G3X9Q0;Q8C181-3;Q8C181-2;Q8C181;Q8C181-4;Q8R003;Q3TJQ3	Muscleblind-like protein 1;Muscleblind-like protein 2	Mbnl1;Mbnl2
2.05816	5.60032e-06	5.25179	Q8BP47	Asparagine--tRNA ligase, cytoplasmic	Nars
2.03581	2.23832e-07	6.65008	Q99J87	Probable ATP-dependent RNA helicase DHX58	Dhx58
2.02554	0.00136183	2.86588	Q3U0V1	Far upstream element-binding protein 2	Khsrp
2.02385	2.29584e-08	7.63906	Q3TBA3;P21958;F6QHF1	Antigen peptide transporter 1	Tap1
2.02114	2.23392e-06	5.65093	P62748	Hippocalcin-like protein 1	Hpcal1
2.01686	0.000106955	3.9708	P34902;A2AGH5;B0QZX1	Cytokine receptor common subunit gamma	Il2rg;Gm20489
2.00913	6.57676e-07	6.18199	P41216;D3Z041;D3Z457;D3YVF6;F6WNZ2	Long-chain-fatty-acid--CoA ligase 1	Acsl1
2.00263	1.34018e-07	6.87284	Q9D1M0	Protein SEC13 homolog	Sec13
1.99293	3.96102e-09	8.40219	P36371	Antigen peptide transporter 2	Tap2
1.97656	0.0206923	1.68419	Q00PI9	Heterogeneous nuclear ribonucleoprotein U-like protein 2	Hnrnpul2
1.96738	0.0298836	1.52457	P26011	Integrin beta-7	Itgb7
1.9637	9.06509e-11	10.0426	P01899;P01897;P01896;A7VMS6;E9Q0G4;G3UXE9;G3UX20;K7N5P0;G3UZL7;G3UY84	H-2 class I histocompatibility antigen, D-B alpha chain;H-2 class I histocompatibility antigen, L-D alpha chain	H2-D1;H2-L
1.96178	1.63277e-06	5.78708	Q8CAS9-2;Q8CAS9;Q8CAS9-3;H7BWY5;F6U1Y8	Poly [ADP-ribose] polymerase 9	Parp9
1.94941	0.0005439	3.26448	O35737;Q8C2Q7	Heterogeneous nuclear ribonucleoprotein H;Heterogeneous nuclear ribonucleoprotein H, N-terminally processed	Hnrnph1
1.94282	0.000105745	3.97574	P47856-2;P47856;Q9Z2Z9;D3YYD9	Glutamine--fructose-6-phosphate aminotransferase [isomerizing] 1	Gfpt1
1.9323	0.000992905	3.00309	Q8BGQ7	Alanine--tRNA ligase, cytoplasmic	Aars
1.92457	1.91178e-07	6.71856	P48036	Annexin A5	Anxa5
1.92047	1.42206e-05	4.84708	Q9EPU0-2;Q9EPU0	Regulator of nonsense transcripts 1	Upf1
1.91861	2.92497e-06	5.53388	Q9Z0H4-11;E9QA47;Q9Z0H4-7;Q9Z0H4-5;Q9Z0H4-4;F6V6I8;Q9Z0H4;Q9Z0H4-8;Q9Z0H4-2;Q9Z0H4-6;Q9Z0H4-9;A3KGT2;A3KGT0	CUGBP Elav-like family member 2	Celf2
1.91651	6.04648e-06	5.2185	O35639	Annexin A3	Anxa3
1.89718	0.0472296	1.32579	P51908	C->U-editing enzyme APOBEC-1	Apobec1
1.89434	3.32257e-08	7.47853	Q501J6;Q3U741;Q501J6-2	Probable ATP-dependent RNA helicase DDX17	Ddx17
1.89346	7.88508e-05	4.10319	Q91UZ6		D17H6S56E-5
1.89264	5.30593e-07	6.27524	Q922B2;Q8BJY7	Aspartate--tRNA ligase, cytoplasmic	Dars
1.8899	0.000660564	3.18009	Q62093	Serine/arginine-rich splicing factor 2	Srsf2
1.88981	4.88119e-07	6.31147	E9PX59;Q69Z37;D3Z7L1	Sterile alpha motif domain-containing protein 9-like	Samd9l
1.88395	0.0208414	1.68107	E9QA05;Q8C405;O35892;Q3U5P2;O35892-2;E9Q4Y0;D6RIJ4;F6WL90;Q99388	Nuclear autoantigen Sp-100	Sp100
1.87136	0.000257346	3.58948	Q6WVG3;Q8C7J6;Q50H33-2;Q50H33	BTB/POZ domain-containing protein KCTD12	Kctd12
1.87112	2.02075e-06	5.69449	P70333;J3QPH6	Heterogeneous nuclear ribonucleoprotein H2	Hnrnph2
1.86626	4.45488e-06	5.35116	F8WJG3;P62996	Transformer-2 protein homolog beta	Tra2b
1.85433	0.0102505	1.98925	Q8BT60;Q9D6C8;P59108;Q1RLL3;Q3UYN2;Q9Z140;Q8BLR2;Q0VE82;Q9DC53;B2RS65;Q8JZW4	Copine-3	Cpne3
1.84695	0.000900605	3.04547	E9PZJ8;E9PZJ8-2	Activating signal cointegrator 1 complex subunit 3	Ascc3
1.8398	5.09141e-09	8.29316	Q60766-2;Q60766;Q5NCB5	Immunity-related GTPase family M protein 1	Irgm1
1.8292	1.1314e-05	4.94638	P26151	High affinity immunoglobulin gamma Fc receptor I	Fcgr1
1.81839	0.00262475	2.58091	Q9Z204-2;Q9Z204-4;Q9Z204-3;Q9Z204;Q9Z204-5	Heterogeneous nuclear ribonucleoproteins C1/C2	Hnrnpc
1.81346	2.70878e-07	6.56723	Q8VI93;F7CXR7	2-5-oligoadenylate synthase 3	Oas3
1.81337	0.000507089	3.29492	Q6PE80;Q00993;F6YPR4	Tyrosine-protein kinase receptor UFO	Axl
1.79769	0.000157725	3.8021	P97384;D3Z7U0	Annexin A11;Annexin	Anxa11
1.79683	2.28274e-08	7.64154	Q91XB0;D3YUE0	Three prime repair exonuclease 1	Trex1
1.77275	0.000111304	3.95349	P08207	Protein S100-A10	S100a10
1.76776	0.00203276	2.69191	Q64277;D3Z579	ADP-ribosyl cyclase 2	Bst1
1.76547	4.57821e-05	4.3393	Q8R081;G5E924;G3UY38;G3UY56;G3UYY3	Heterogeneous nuclear ribonucleoprotein L	Hnrnpl
1.76547	0.000217155	3.66323	Q03963	Interferon-induced, double-stranded RNA-activated protein kinase	Eif2ak2
1.76503	6.71542e-05	4.17293	Q8R502;D3YUV5	Leucine-rich repeat-containing protein 8C	Lrrc8c
1.75769	1.39053e-06	5.85682	Q61792;A2A6G9;A2A6H0;A2A6G7;A2A6G8;A2A6G6;A2A6G5;E9Q0N6;A2A6H1;A2A6G0;A2A6G4;Q9DC07	LIM and SH3 domain protein 1	Lasp1
1.74475	5.73589e-05	4.2414	Q8C172;H3BL08	Ceramide synthase 6	Cers6
1.74471	5.8136e-05	4.23555	Q9D8C4;D6RFB1	Interferon-induced 35 kDa protein homolog	Ifi35
1.73271	0.00587568	2.23094	Q6P1F6;Q925E7;F6RV17;Q6ZWR4-3;Q6ZWR4;Q6ZWR4-2;G3UZP6;G3UXS9;Q8BG02	Serine/threonine-protein phosphatase 2A 55 kDa regulatory subunit B alpha isoform;Serine/threonine-protein phosphatase 2A 55 kDa regulatory subunit B delta isoform	Ppp2r2a;Ppp2r2d
1.72805	0.001942	2.71175	Q62523	Zyxin	Zyx
1.72703	5.94296e-07	6.226	B1AXN9;P18654;B1AXP0;Q7TPS0-2;A2CEE6;Q7TPS0-3;A2CEE5;Q7TPS0;E9PUP0;A2CEE7;E9QK39;B1AXN8;B1AXN5;B1AXN7;F6UG16;B2GVN8	Ribosomal protein S6 kinase alpha-3	Rps6ka3
1.72462	1.73645e-05	4.76034	Q8VDM4;J3KMQ2;E9Q2S8	26S proteasome non-ATPase regulatory subunit 2	Psmd2;Gm5422
1.71559	6.24071e-05	4.20477	Q9QYS9-8;Q9QYS9-4;Q9QYS9-3;Q9QYS9-6;Q9QYS9-2;Q9QYS9;Q9QYS9-7;Q9QYS9-5	Protein quaking	Qki
1.69629	0.00189901	2.72147	E9Q5I7;Q3UAM9;Q63961;F7BZW0	Endoglin	Eng
1.68756	0.0379066	1.42129	Q91V08;Q9D676-2;Q9D676;F7ASN1	C-type lectin domain family 2 member D	Clec2d
1.68306	1.11498e-07	6.95273	Q9ER38;M0QWH2	Torsin-3A	Tor3a
1.67658	1.36329e-05	4.86541	P70372	ELAV-like protein 1	Elavl1
1.66845	0.00507436	2.29462	P62320	Small nuclear ribonucleoprotein Sm D3	Snrpd3
1.66644	8.09479e-05	4.09179	E9PXI0;P27870;Q8VDU4	Proto-oncogene vav	Vav1
1.64205	4.97494e-06	5.30321	P61211;F8WIB1;E9Q006	ADP-ribosylation factor-like protein 1	Arl1
1.64007	0.00267834	2.57213	Q8VIJ6	Splicing factor, proline- and glutamine-rich	Sfpq
1.63939	3.05607e-07	6.51484	O88685;A2AGN7;B7ZCF1;F6Q2E3	26S protease regulatory subunit 6A	Psmc3
1.63192	8.64056e-06	5.06346	Q921F2;Q8R0B4;Q8BLD4;Q6VYI5;Q6VYI4	TAR DNA-binding protein 43	Tardbp
1.62914	0.000862426	3.06428	P23249;D3YVL0;E9PW39;D3YYR1	Putative helicase MOV-10	Mov10
1.62781	8.91164e-09	8.05004	P08103;F6UND7;P08103-2	Tyrosine-protein kinase HCK	Hck
1.62778	8.17764e-06	5.08737	Q9CYN9	Renin receptor	Atp6ap2
1.62745	7.56663e-06	5.1211	Q9Z2X1-2;Q9Z2X1;J3QMQ5;J3QMT0;J3QM80;J3QP45	Heterogeneous nuclear ribonucleoprotein F;Heterogeneous nuclear ribonucleoprotein F, N-terminally processed	Hnrnpf;Gm6430
1.62081	1.60102e-08	7.7956	P01901;P14428;P03991	H-2 class I histocompatibility antigen, K-B alpha chain	H2-K1
1.61939	1.2756e-05	4.89429	Q99LE6	ATP-binding cassette sub-family F member 2	Abcf2
1.61738	1.21614e-05	4.91502	O35309;B7ZD13;B7ZD12	N-myc-interactor	Nmi
1.60735	0.000316621	3.49946	Q5SUT0;Q61545;Q5SUS9;Q5SUS8	RNA-binding protein EWS	Ewsr1
1.60612	5.38834e-05	4.26854	Q91WK2	Eukaryotic translation initiation factor 3 subunit H	Eif3h
1.60546	1.37522e-06	5.86163	O08553;Q3TT92;Q62188;E9PWE8;D3YUS0;P97427;Q6P1J1	Dihydropyrimidinase-related protein 2	Dpysl2
1.60199	0.00084004	3.0757	Q68FL6;E9QB02;F6W0G8	Methionine--tRNA ligase, cytoplasmic	Mars
1.60173	0.000205722	3.68672	Q9DBE7;A2A5S3;A2A5R8;Q9Z108	Double-stranded RNA-binding protein Staufen homolog 1	Stau1
1.59175	2.1825e-06	5.66104	P35700;B1AXW5;B1AXW6;B1AXW4	Peroxiredoxin-1	Prdx1
1.58335	0.0159336	1.79769	Q9QY24;A2APF7;Q9QY24-2	Z-DNA-binding protein 1	Zbp1
1.57395	9.12951e-07	6.03955	P63037;B1AXY1;B1AXY0;B1AXX9	DnaJ homolog subfamily A member 1	Dnaja1
1.57191	0.000488209	3.31139	P61750;E9Q798;F6UFB9	ADP-ribosylation factor 4	Arf4
1.55391	8.78718e-06	5.05615	Q05144	Ras-related C3 botulinum toxin substrate 2	Rac2
1.55269	2.70555e-05	4.56774	Q60738;F6TRQ3	Zinc transporter 1	Slc30a1
1.55175	2.68617e-05	4.57087	P97379-2;P97379	Ras GTPase-activating protein-binding protein 2	G3bp2
1.54969	6.81984e-07	6.16623	P48025;E9PWE9	Tyrosine-protein kinase SYK;Tyrosine-protein kinase	Syk
1.54903	0.00050647	3.29545	Q9CQC9	GTP-binding protein SAR1b	Sar1b
1.54856	0.0129	1.88941	Q8K310	Matrin-3	Matr3
1.54047	3.05431e-07	6.51509	O09126	Semaphorin-4D	Sema4d
1.53365	0.00415964	2.38094	Q9D0E1-2;Q9D0E1;B8JK33;B8JK32;F6W322;F7C9U3	Heterogeneous nuclear ribonucleoprotein M	Hnrnpm
1.52553	3.02147e-05	4.51978	Q9JIA7	Sphingosine kinase 2	Sphk2
1.5237	0.0154277	1.8117	D3Z158;Q8BML9;Q8R1V9;F6TDS3		Qars
1.51515	6.1116e-06	5.21385	Q64343	ATP-binding cassette sub-family G member 1	Abcg1
1.51373	1.34821e-06	5.87024	Q3UPV6;P62482;E0CXZ9;E0CXI4;E0CYS2;F6U2R9;Q3U6C5;Q8CD65;Q9D5E9;P63143	Voltage-gated potassium channel subunit beta-2	Kcnab2
1.50783	9.8657e-06	5.00587	P56477;F6Z6C6;E9Q5T2	Interferon regulatory factor 5	Irf5
1.50685	0.00367962	2.4342	O35239	Tyrosine-protein phosphatase non-receptor type 9	Ptpn9
1.50659	9.37573e-05	4.02799	Q61171;D3Z4A4	Peroxiredoxin-2	Prdx2
1.50569	0.000917807	3.03725	Q8CII9-2;Q8CII9;Q8CII9-3	Cytokine receptor-like factor 2	Crlf2
1.50534	0.00383972	2.4157	P35123;Q99K46	Ubiquitin carboxyl-terminal hydrolase 4	Usp4
1.50528	0.0222735	1.65221	Q99M07	Cytochrome c oxidase assembly factor 5	Coa5
1.5049	0.00179798	2.74521	O35286;Q05BH3;G3X8X0	Putative pre-mRNA-splicing factor ATP-dependent RNA helicase DHX15	Dhx15
1.49936	0.000239006	3.62159	Q6PDM2;H7BX95;Q6PDM2-3;Q6PDM2-2;F7AI47	Serine/arginine-rich splicing factor 1	Srsf1
1.49632	1.33597e-05	4.8742	P14685;F7B7L8	26S proteasome non-ATPase regulatory subunit 3	Psmd3
1.48511	6.30062e-05	4.20062	P62334	26S protease regulatory subunit 10B	Psmc6
1.48219	0.002292	2.63979	Q8BYK6-3;Q8BYK6;Q8BYK6-2	YTH domain family protein 3	Ythdf3
1.48148	0.000287092	3.54198	Q61510;Q5SU71;Q5SU72	E3 ubiquitin/ISG15 ligase TRIM25	Trim25
1.47711	1.36859e-05	4.86373	P68134;P68033;P63268;P62737;D3YZY0;D3Z2K3	Actin, alpha skeletal muscle;Actin, alpha cardiac muscle 1;Actin, gamma-enteric smooth muscle;Actin, aortic smooth muscle	Acta1;Actc1;Actg2;Acta2
1.4748	1.50175e-07	6.8234	P14824	Annexin A6	Anxa6
1.45553	0.00166053	2.77975	P68181-4;P68181-2;P68181-3;P68181;P05132-2;P05132	cAMP-dependent protein kinase catalytic subunit beta	Prkacb
1.45519	2.68553e-06	5.57097	Q99LF4	tRNA-splicing ligase RtcB homolog	D10Wsu52e
1.44796	4.81005e-06	5.31785	Q91VR5	ATP-dependent RNA helicase DDX1	Ddx1
1.4406	0.0113765	1.94399	P62315	Small nuclear ribonucleoprotein Sm D1	Snrpd1
1.43333	0.000612359	3.21299	P29452	Caspase-1;Caspase-1 subunit p20;Caspase-1 subunit p10	Casp1
1.42721	0.000512208	3.29055	P11276	Fibronectin;Anastellin	Fn1
1.42317	3.21058e-06	5.49342	P61979-3;B2M1R6;P61979;P61979-2;H3BKD0;D3Z5X4;D3YWG1;H3BK96;H3BKI8;Q8BT23;H3BJ43;H3BLP7	Heterogeneous nuclear ribonucleoprotein K	Hnrnpk;Gm7964
1.42253	4.70258e-05	4.32766	P14106	Complement C1q subcomponent subunit B	C1qb
1.42045	6.19028e-06	5.20829	F6TLV3;Q8BX90;E0CXY0;F7BWH4	Fibronectin type-III domain-containing protein 3A	Fndc3a
1.41401	0.000698837	3.15562	Q9D8T2	Gasdermin-D	Gsdmdc1
1.41329	1.13665e-05	4.94437	E9QP99;P55937-1;P55937;D3Z0Q8	Golgin subfamily A member 3	Golga3
1.41123	1.6356e-06	5.78632	Q6A0A9;Q8C3F2-3;Q8C3F2	Constitutive coactivator of PPAR-gamma-like protein 1	FAM120A
1.40962	4.3043e-06	5.3661	E9QNL8;E9Q5M7;P24063;D3Z627;D3YW95	Integrin alpha-L	Itgal
1.40226	0.0173564	1.76054	O70133-2;E9QNN1;O70133;O70133-3	ATP-dependent RNA helicase A	Dhx9
1.40029	6.9446e-07	6.15835	Q62192;F2Z425;E9Q009	CD180 antigen	Cd180
1.39444	0.000298514	3.52504	Q64012-2;A2AU62;Q64012;A2AU61;A2AU60	RNA-binding protein Raly	Raly
1.39245	8.61604e-05	4.06469	P62192	26S protease regulatory subunit 4	Psmc1
1.39199	0.000336924	3.47247	Q91YT7;E9PW90;F6Y6H7		Ythdf2
1.38814	4.76266e-07	6.32215	Q61656;Q8BTS0;B1ARB9;B1ARC0;B1ARB8	Probable ATP-dependent RNA helicase DDX5	Ddx5
1.38421	0.00182853	2.7379	P32067;F6SXM5;D6RI87;A2AR07	Lupus La protein homolog	Ssb
1.38061	3.42468e-05	4.46538	Q9WUA3;Q8C605;Q9WUA3-2;D3YUA3;F6YL81	6-phosphofructokinase type C;6-phosphofructokinase	Pfkp
1.38046	0.0133895	1.87324	Q61937;Q9DAY9;E9Q5T3;Q5SQB5;Q5SQB0	Nucleophosmin	Npm1;Gm5611
1.37927	6.01167e-07	6.22101	P21855;Q3UB58;A2AIN5;Q3UZ35;Q3UNJ0	B-cell differentiation antigen CD72	Cd72
1.3653	0.0370934	1.4307	E9QAT4;A2AIX1;F7BPW6		Sec16a
1.35866	0.0175663	1.75532	Q80VD1	Protein FAM98B	Fam98b
1.35703	0.000637629	3.19543	Q3TRM8;E9Q8S8;E9Q3Z4;D6RFA3;D3Z2E4;D6RCV7	Hexokinase-3	Hk3
1.35444	6.30384e-06	5.20039	Q60865;F6YLI0;F6YP03;A2BH47	Caprin-1	Caprin1
1.35336	0.00916995	2.03763	P97311	DNA replication licensing factor MCM6	Mcm6
1.34996	8.74302e-05	4.05834	Q5UE59;E9Q7C9;Q7TNF4;Q8CD76;O88447;O88448;D3YXZ3;Q91YS4;F6UYN4;Q9DBS5;D3Z710;Q91W40	Kinesin light chain 1	Klc1
1.33836	0.000616908	3.20978	Q8VEK3;G3XA10	Heterogeneous nuclear ribonucleoprotein U	Hnrnpu
1.3311	0.000121356	3.91594	P62196;Q8K1K2	26S protease regulatory subunit 8	Psmc5
1.33029	0.008253	2.08339	O88569-2;O88569;O88569-3	Heterogeneous nuclear ribonucleoproteins A2/B1	Hnrnpa2b1
1.33021	1.0174e-05	4.99251	P21107-2;D3Z2H9;D3Z6I8;Q8K0Z5;E9Q5J9;D3YVR0;E9Q448;B7ZNL3		Tpm3-rs7;Tpm3
1.3261	0.000272661	3.56438	Q9QYI3;F7BTP8;A2A5E1	DnaJ homolog subfamily C member 7	Dnajc7
1.3248	2.26819e-05	4.64432	Q9R1Q9;Q3TKX1;B7FAU3;B7FAU7;F6ZE56;F6X9J0	V-type proton ATPase subunit S1	Atp6ap1
1.32478	7.5102e-07	6.12435	Q8BMP6	Golgi resident protein GCP60	Acbd3
1.32417	0.000135137	3.86922	Q61166	Microtubule-associated protein RP/EB family member 1	Mapre1
1.31913	5.20616e-05	4.28348	Q02053;P31254	Ubiquitin-like modifier-activating enzyme 1	Uba1
1.31437	8.75234e-05	4.05788	Q8BG32;G3UYH2;G3UX67;G3UWV7;G3UYL8;G3UX15;G3UYI4;G3UYL3;G3UWW7;G3UXL5;G3UZ28;G3UZ33	26S proteasome non-ATPase regulatory subunit 11	Psmd11
1.31088	5.8053e-06	5.23618	Q3TXS7;J3QN38	26S proteasome non-ATPase regulatory subunit 1	Psmd1
1.31068	0.00637859	2.19528	P11881-8;P11881-7;P11881-6;P11881-5;P11881-4;P11881-2;P11881-3;P11881	Inositol 1,4,5-trisphosphate receptor type 1	Itpr1
1.30962	6.70944e-06	5.17331	Q543K9;P23492;Q9D8C9	Purine nucleoside phosphorylase	Pnp
1.30895	0.00101326	2.99428	E9Q987;D3Z3L3		Trim12c
1.30694	1.61034e-05	4.79308	Q8BHD7;Q8BHD7-2;G8JL74;G3UXA6;G3UZ01;F7C521;G3UXZ8;G3UY95	Polypyrimidine tract-binding protein 3	Ptbp3
1.30198	0.000314461	3.50243	P62862;Q642K5	40S ribosomal protein S30	Fau
1.28798	1.81309e-06	5.74158	P16330-2;P16330	2,3-cyclic-nucleotide 3-phosphodiesterase	Cnp
1.28314	4.08503e-06	5.3888	Q9QYJ0	DnaJ homolog subfamily A member 2	Dnaja2
1.28284	0.000236797	3.62562	P97808;F6TWM7	FXYD domain-containing ion transport regulator 5	Fxyd5
1.2805	2.62212e-05	4.58135	Q3U7G2;Q05910;E9Q359;G3UXF8	Disintegrin and metalloproteinase domain-containing protein 8	Adam8
1.27703	0.00197239	2.70501	O70281;D3Z1F4	Protein-tyrosine sulfotransferase 1	Tpst1
1.25351	1.0145e-05	4.99375	Q60875-5;H3BJU7;Q60875-4;H3BJX8;H3BJ45;H3BJ40;H3BKH9;Q60875;Q60875-3;Q60875-2;H3BL15;H3BLF9;H3BJ59;H3BLJ1;H3BIX8;H3BJM4;H3BJ48	Rho guanine nucleotide exchange factor 2	Arhgef2
1.2521	3.49736e-06	5.45626	Q8R3Q0	Store-operated calcium entry-associated regulatory factor	Tmem66
1.25087	0.000417783	3.37905	Q8CIH5	1-phosphatidylinositol 4,5-bisphosphate phosphodiesterase gamma-2	Plcg2
1.24416	5.81308e-08	7.23559	Q9Z1Q2;G3UXA4;G3UZK8;G3UX11;G3XA64;G3UYU8;Q80YU0	Abhydrolase domain-containing protein 16A	Abhd16a
1.24232	0.0296789	1.52755	Q9WTK5	Nuclear factor NF-kappa-B p100 subunit;Nuclear factor NF-kappa-B p52 subunit	Nfkb2
1.2328	0.000535103	3.27156	Q8BZ20	Poly [ADP-ribose] polymerase 12	Parp12
1.22938	0.0389483	1.40951	P28667	MARCKS-related protein	Marcksl1
1.2286	3.19843e-05	4.49506	Q61584-4;Q61584-3;Q61584;Q61584-5;Q61584-6;Q61584-2;Q61584-7	Fragile X mental retardation syndrome-related protein 1	Fxr1
1.21866	4.24455e-08	7.37217	Q8BN21;Q8BN21-2;Q8BN21-3;Q5SP86	Serine/threonine-protein kinase VRK2	Vrk2
1.21802	9.68149e-06	5.01406	Q62418-3;Q62418-2;Q62418	Drebrin-like protein	Dbnl
1.21672	3.48807e-06	5.45741	Q9R0E1;F6W3Q8	Procollagen-lysine,2-oxoglutarate 5-dioxygenase 3	Plod3
1.21658	2.66712e-06	5.57396	Q2EMV9;Q2EMV9-2	Poly [ADP-ribose] polymerase 14	Parp14
1.21636	0.00139618	2.85506	E9Q066;Q8BWW4;G3X9Q6	La-related protein 4	Larp4
1.20975	2.57009e-05	4.59005	P12023;P12023-3;P12023-2	Amyloid beta A4 protein;N-APP;Soluble APP-alpha;Soluble APP-beta;C99;Beta-amyloid protein 42;Beta-amyloid protein 40;C83;P3(42);P3(40);C80;Gamma-secretase C-terminal fragment 59;Gamma-secretase C-terminal fragment 57;Gamma-secretase C-terminal fragment 50;C31	App
1.20871	0.000195239	3.70943	E9QKL6		Ifi204
1.19734	3.0625e-06	5.51392	E9PWG2;E9PY51		Trappc8
1.19589	6.33216e-07	6.19845	Q504P2	C-type lectin domain family 12 member A	Clec12a
1.18683	6.69379e-07	6.17433	Q00612;A3KG36;P97324;G3UWD6	Glucose-6-phosphate 1-dehydrogenase X;Glucose-6-phosphate 1-dehydrogenase	G6pdx
1.1862	0.00371858	2.42962	Q8R4B8-3;Q8R4B8;Q8R4B8-2;Q8R4B8-4;Q5SXI6	NACHT, LRR and PYD domains-containing protein 3	Nlrp3
1.18263	4.00698e-05	4.39718	J3QP68;P28656;E9PW66	Nucleosome assembly protein 1-like 1	Gm4204;Nap1l1
1.17618	0.00021861	3.66033	Q99JI4	26S proteasome non-ATPase regulatory subunit 6	Psmd6
1.17566	0.00390386	2.40851	Q8BG84-5;Q8BG84-4;Q8BG84-2;Q8BG84-6;Q8BG84;Q8BG84-3;G8JL64	Leukocyte-associated immunoglobulin-like receptor 1	Lair1
1.16973	0.000499736	3.30126	Q9Z1Z2	Serine-threonine kinase receptor-associated protein	Strap
1.16301	4.46178e-05	4.35049	Q3U2G2;Q61316;E0CY23;Q61699-2;P48722-2;E9Q0U7;P48722;Q61699	Heat shock 70 kDa protein 4	Hspa4
1.16296	0.000450132	3.34666	P46471;Q8BVQ9	26S protease regulatory subunit 7	Psmc2
1.1616	1.7568e-05	4.75528	Q31093		H2-M3
1.16152	0.00125006	2.90307	P54775	26S protease regulatory subunit 6B	Psmc4
1.16123	0.00181936	2.74008	Q9EQ32-2;Q9EQ32;Q9EQ32-3	Phosphoinositide 3-kinase adapter protein 1	Pik3ap1
1.16023	9.08731e-05	4.04156	Q9JJ28	Protein flightless-1 homolog	Flii
1.15897	2.74414e-06	5.56159	Q9DCT5	Stromal cell-derived factor 2	Sdf2
1.15413	8.74715e-05	4.05813	Q8BGJ5;Q922I7;Q8CB58;P17225;E9QMW9;E9Q0W3;F7DCW4;F7AXP1	Polypyrimidine tract-binding protein 1	Ptbp1
1.1525	0.0114075	1.94281	P35550	rRNA 2-O-methyltransferase fibrillarin	Fbl
1.15067	9.04144e-07	6.04376	Q8VDJ3	Vigilin	Hdlbp
1.14992	0.00743258	2.12886	Q99KP6;Q99KP6-2;J3QNL8;Q99KP6-3	Pre-mRNA-processing factor 19	Prpf19
1.13971	0.0161655	1.79141	Q60749	KH domain-containing, RNA-binding, signal transduction-associated protein 1	Khdrbs1
1.13796	1.4565e-07	6.83669	E9PUQ9;E2JF22;F7AC58;F6PYU5;F6QY99	Piezo-type mechanosensitive ion channel component 1	Piezo1
1.13484	0.0259825	1.58532	P62307	Small nuclear ribonucleoprotein F	Snrpf
1.13401	1.60898e-06	5.79345	P10126;D3YZ68;D3Z3I8;P62631	Elongation factor 1-alpha 1	Eef1a1
1.12946	0.000263438	3.57932	Q8CIM5	G-protein coupled receptor 84	Gpr84
1.12229	1.22043e-05	4.91349	Q99K70;B1AWT2;Q7TT45;B1AWT3;B1AWT4;Q99K70-2	Ras-related GTP-binding protein C	Rragc
1.11586	0.000371375	3.43019	P28740-2;P28740;P28740-1;E0CZ72;F8VQ42;Q9D481;F6SUU5;Q8C0N1;Q3TTL2;Q922S8	Kinesin-like protein KIF2A	Kif2a
1.1146	6.28229e-06	5.20188	Q9D6M3;E9PV90;E9PY45;E9Q6M6;E9Q579;Q9DB41-2;Q9DB41;G3UX09;G3UY41	Mitochondrial glutamate carrier 1	Slc25a22
1.11167	0.000548414	3.26089	P17710-3;G3UVV4;P17710-4;P17710;P17710-2;D3YYR4;D3Z365;D3Z105;B4YB29;F6QD41	Hexokinase-1	Hk1
1.11145	0.000910319	3.04081	Q9QZD9;A2AE03	Eukaryotic translation initiation factor 3 subunit I	Eif3i
1.1096	3.44916e-05	4.46229	Q80VP0;Q80VP0-2	Tectonin beta-propeller repeat-containing protein 1	Tecpr1
1.10815	0.000241027	3.61793	E9Q9A9;E9Q9A9-2;F7CFL3	2-5-oligoadenylate synthase 2	Oas2
1.10441	0.0356436	1.44802	Q9D8T4	Golgi apparatus membrane protein TVP23 homolog B	Tvp23b
1.10323	0.0201482	1.69576	Q8BVY0		Rsl1d1
1.09612	7.85284e-05	4.10497	Q6P542	ATP-binding cassette sub-family F member 1	Abcf1
1.08908	0.00060065	3.22138	Q60817;P70670	Nascent polypeptide-associated complex subunit alpha;Nascent polypeptide-associated complex subunit alpha, muscle-specific form	Naca
1.08787	0.0247099	1.60713	Q3TJZ6	Protein FAM98A	Fam98a
1.07552	0.000143623	3.84278	Q3TRH2;Q9D8W5;B1AT36	26S proteasome non-ATPase regulatory subunit 12	Psmd12
1.07501	0.00703344	2.15283	O35386	Phytanoyl-CoA dioxygenase, peroxisomal	Phyh
1.07267	9.76603e-06	5.01028	P61027	Ras-related protein Rab-10	Rab10
1.07011	9.06267e-06	5.04274	Q9CZD3	Glycine--tRNA ligase	Gars
1.06965	0.000806173	3.09357	O89051	Integral membrane protein 2B;BRI2, membrane form;BRI2 intracellular domain;BRI2C, soluble form;Bri23 peptide	Itm2b
1.06851	0.0416174	1.38072	D6RE20;Q8CET7;Q80TA1	Ethanolaminephosphotransferase 1	Ept1
1.06275	0.00120707	2.91827	Q80X50-2;Q80X50-4;Q80X50;Q80X50-5;Q80X50-3	Ubiquitin-associated protein 2-like	Ubap2l
1.06228	0.000676676	3.16962	Q64281-2;Q64281	Leukocyte immunoglobulin-like receptor subfamily B member 4	Lilrb4
1.05893	6.89269e-05	4.16161	Q9CZL2	Uncharacterized protein C4orf32 homolog
1.05558	0.000541581	3.26634	Q99MK8;Q7TS64;F6QY34;F7AEX1;E9PW16;E9Q419	Beta-adrenergic receptor kinase 1	Adrbk1
1.05263	0.00121738	2.91457	Q14CH1	Molybdenum cofactor sulfurase	Mocos
1.0511	1.04322e-05	4.98163	Q7TMK9-2;Q7TMK9;G3UZI2;G3V018;G3UZ48;G3UXJ6;G3UWM1;G3XA76;G3UXU5	Heterogeneous nuclear ribonucleoprotein Q	Syncrip
1.04739	6.4068e-05	4.19336	O35593	26S proteasome non-ATPase regulatory subunit 14	Psmd14
1.04454	3.17317e-05	4.49851	P58252;G3UXK8	Elongation factor 2	Eef2
1.04396	0.000132525	3.8777	Q5NCF2;B1ASW5;B1ASW6	Trafficking protein particle complex subunit 1	Trappc1
1.04215	0.00135848	2.86695	Q9WUK2-2;Q9WUK2	Eukaryotic translation initiation factor 4H	Eif4h
1.02681	0.00088463	3.05324	O35375-2;O35375-3;O35375-4;O35375	Neuropilin-2	Nrp2
1.02507	0.00102412	2.98965	Q80YW0	Cytohesin-4	Cyth4
1.02318	2.38491e-05	4.62253	Q8BU31;Q80ZJ1-2	Ras-related protein Rap-2c	Rap2c
1.01874	8.48032e-05	4.07159	B2RXC1	Trafficking protein particle complex subunit 11	Trappc11
1.01819	0.000816165	3.08822	P35991;A2BDW0	Tyrosine-protein kinase BTK	Btk
1.01593	0.00195306	2.70928	O35685	Nuclear migration protein nudC	Nudc
1.01345	0.00448639	2.3481	Q8K2L8;Q8C0C3	Trafficking protein particle complex subunit 12	Trappc12
1.0116	0.0033968	2.46893	Q3TW96;Q3TW96-2;Q91YN5-2;Q91YN5-3;Q91YN5;Q3UHZ7	UDP-N-acetylhexosamine pyrophosphorylase-like protein 1	Uap1l1
1.00991	0.00604651	2.2185	Q8BJU0;Q8BJU0-2	Small glutamine-rich tetratricopeptide repeat-containing protein alpha	Sgta
1.00665	0.047746	1.32106	Q6ZQ58;J3QNB1;Q6ZQ58-2	La-related protein 1	Larp1
1.00363	0.000860205	3.0654	P63330;P62715	Serine/threonine-protein phosphatase 2A catalytic subunit alpha isoform;Serine/threonine-protein phosphatase 2A catalytic subunit beta isoform	Ppp2ca;Ppp2cb
1.00067	0.000221807	3.65403	P41251	Natural resistance-associated macrophage protein 1	Slc11a1
0.999598	0.00363583	2.4394	Q3U5V8;Q9D3G5	Syntaxin-11	Stx11
3.32372	0.0676552	1.1697	E9PXF7;D3Z6F0		Gm14446
2.58647	0.139619	0.855055	Q7M739;F6ZDS4;F6RX08	Nucleoprotein TPR	Tpr
2.30254	0.0945633	1.02428	Q99PV0;B7ZC27	Pre-mRNA-processing-splicing factor 8	Prpf8
1.81217	0.0990551	1.00412	P27048;P63163	Small nuclear ribonucleoprotein-associated protein B;Small nuclear ribonucleoprotein-associated protein N	Snrpb;Snrpn
1.80693	0.168285	0.773955	D3Z7C6;Q9R0Q7	Prostaglandin E synthase 3	Ptges3
1.76295	0.506724	0.295228	Q9CR84;P56384;P56383	ATP synthase lipid-binding protein, mitochondrial	Atp5g1;Atp5g3;Atp5g2
1.62502	0.0675946	1.17009	Q921M3;Q921M3-2	Splicing factor 3B subunit 3	Sf3b3
1.59045	0.120811	0.917893	Q9DCF9-2;Q9DCF9	Translocon-associated protein subunit gamma	Ssr3
1.58223	0.118938	0.924678	Q9EPB4	Apoptosis-associated speck-like protein containing a CARD	Pycard
1.48844	0.187515	0.726964	P61327;Q9CQL1;G3UZW7;G3UYI5	Protein mago nashi homolog;Protein mago nashi homolog 2	Magoh;Magohb
1.30936	0.0639153	1.1944	Q3TWW8;Q8VE97;Q542V3;A2A837		Srsf6
1.30316	0.229905	0.638451	E9Q557;E9PZW0	Desmoplakin	Dsp
1.26521	0.055201	1.25805	Q8VDF2-2;Q8VDF2;E9Q5Y5	E3 ubiquitin-protein ligase UHRF1	Uhrf1
1.18771	0.068534	1.16409	Q8BFZ3	Beta-actin-like protein 2	Actbl2
1.12687	0.164217	0.784583	Q02257	Junction plakoglobin	Jup
1.11664	0.125777	0.9004	Q923D4	Splicing factor 3B subunit 5	Sf3b5
1.07889	0.0701657	1.15388	G3UZ34;O08810;A2AH85	116 kDa U5 small nuclear ribonucleoprotein component	Eftud2
1.05293	0.0569209	1.24473	Q5NBU8;Q5NBU8-3	XIAP-associated factor 1	Xaf1
1.04345	0.0826254	1.08289	P62984;E9Q9J0;J3QK04;E9Q5F6;Q5SX22;P0CG49;P0CG50	Ubiquitin-60S ribosomal protein L40;Ubiquitin;60S ribosomal protein L40;Polyubiquitin-B;Ubiquitin;Polyubiquitin-C;Ubiquitin;Ubiquitin-related 1;Ubiquitin-related 2	Uba52;Gm7808;Ubc;Ubb
1.00992	0.0506347	1.29555	Q8BHL5-2;Q8BHL5;Q8BHL5-3;F6YXR3;Q5GMG0;F6XD63	Engulfment and cell motility protein 2	Elmo2
1.00506	0.112586	0.948517	Q99M28-2;J3QK23;Q99M28	RNA-binding protein with serine-rich domain 1	Gm9825;Rnps1
0.998796	0.00818906	2.08677	Q9D883;G3UW94;E9Q809;F8WH71;E9Q5Y2;E9PUZ3;E9PXR5;E9Q1I7;E9Q5J3;Q8BGJ9;E9PWX6;E9PWM2	Splicing factor U2AF 35 kDa subunit;Splicing factor U2AF 26 kDa subunit	U2af1;U2af1l4
0.998442	0.0471501	1.32652	Q9CX56	26S proteasome non-ATPase regulatory subunit 8	Psmd8
0.996941	0.13943	0.855644	Q9D3B1	Very-long-chain (3R)-3-hydroxyacyl-[acyl-carrier protein] dehydratase 2	Ptplb
0.992859	0.0332673	1.47798	Q91VC3;E9PV04;A2AFK7;D6RJ60;D6RJ11	Eukaryotic initiation factor 4A-III	Eif4a3;Gm8994
0.990975	0.000961488	3.01706	P61164	Alpha-centractin	Actr1a
0.987019	8.76698e-05	4.05715	Q9WUR9;A2ARF6;F6TEU8	GTP:AMP phosphotransferase AK4, mitochondrial	Ak4
0.986627	0.00245437	2.61006	A2AAN2;Q8BMA6	Signal recognition particle subunit SRP68	Srp68
0.985722	0.000731171	3.13598	Q62419;Q8BXU5;Q62420;A2ALV3;F6ZL13;A2ALV1	Endophilin-A2	Sh3gl1
0.985462	5.49074e-07	6.26037	P11928;Q8VI95;Q924S2	2-5-oligoadenylate synthase 1A	Oas1a
0.984935	0.000194301	3.71153	P97369;A8XU21	Neutrophil cytosol factor 4	Ncf4
0.976793	0.00163103	2.78754	P84104-2;P84104;A2A4X6	Serine/arginine-rich splicing factor 3	Srsf3;Gm12355
0.976439	0.00720952	2.14209	P98086	Complement C1q subcomponent subunit A	C1qa
0.971867	0.0455101	1.34189	Q9DBC7;D3Z4L4;A2AI69;D3YTM5;D3Z068;D3Z0V6;P12849	cAMP-dependent protein kinase type I-alpha regulatory subunit;cAMP-dependent protein kinase type I-alpha regulatory subunit, N-terminally processed	Prkar1a
0.955723	0.0466511	1.33114	E0CZE8;E0CXR0;E0CX98;Q9D2C7	Bax inhibitor 1	Tmbim6
0.952551	0.00290288	2.53717	Q3UV16	Inositol 1,4,5-trisphosphate receptor-interacting protein-like 2	Itpripl2
0.952409	5.53126e-05	4.25718	Q9CYL5;B1AWD6	Golgi-associated plant pathogenesis-related protein 1	Glipr2
0.949522	0.00174054	2.75931	Q99KJ8	Dynactin subunit 2	Dctn2
0.946878	0.00354659	2.45019	O08573-2;B1AQR8;O08573;G3X9T7	Galectin-9	Lgals9
0.946392	2.66828e-05	4.57377	Q9EPR4;Q9EPR4-2;A2ANL1	Solute carrier family 23 member 2	Slc23a2
0.937914	0.000106474	3.97276	Q8CAG6;Q9JHK5;Q5F270	Pleckstrin	Plek
0.929932	0.00470382	2.32755	Q9WUP4;F6WPW1;Q9WUP4-2	Polyprenol reductase	Srd5a3
0.9299	0.0029302	2.5331	Q61735-2;Q61735	Leukocyte surface antigen CD47	Cd47
0.929449	0.000264287	3.57792	O35226-4;O35226;O35226-5;O35226-3;O35226-2	26S proteasome non-ATPase regulatory subunit 4	Psmd4
0.927071	6.85804e-05	4.1638	P00493	Hypoxanthine-guanine phosphoribosyltransferase	Hprt1
0.926371	0.000373517	3.42769	Q9CPR4;Q6ZWZ7;B2RY53;F6YKV1	60S ribosomal protein L17	Rpl17
0.922169	0.230848	0.636674	E9PV44;O35143	ATPase inhibitor, mitochondrial	Atpif1
0.921395	0.00060936	3.21513	Q3KQM4;P26369	Splicing factor U2AF 65 kDa subunit	U2af2
0.918517	0.000889826	3.05069	O08688;D3YU84;D3Z432	Calpain-5	Capn5
0.916773	0.0891953	1.04966	Q6P4T2	U5 small nuclear ribonucleoprotein 200 kDa helicase	Snrnp200
0.912616	0.000240068	3.61967	Q8R0F3;E9Q265;E9Q0Z7;F6QZU1	Sulfatase-modifying factor 1	Sumf1
0.911851	0.0382551	1.41731	Q8R2U0-2;Q8R2U0	Nucleoporin SEH1	Seh1l
0.910505	0.0640932	1.19319	Q8BLR5	PH and SEC7 domain-containing protein 4	Psd4
0.907265	0.0010182	2.99217	Q60668-3;Q60668;F6ZV59;Q60668-4;G5E8G0;Q60668-2;G3X9W0;E9Q5B6;F6SHF3;Q9D3U4	Heterogeneous nuclear ribonucleoprotein D0	Hnrnpd
0.906831	0.000266019	3.57509	P84084;D3YV25;E9Q2C2	ADP-ribosylation factor 5	Arf5
0.905633	0.0144773	1.83931	P42227-2;P42227-3;P42227;B7ZC18	Signal transducer and activator of transcription 3	Stat3
0.902233	6.55731e-05	4.18327	P51410;G3UW34;D3Z629;D3YZT0	60S ribosomal protein L9	Rpl9;Rpl9-ps6
0.901658	3.05717e-05	4.51468	Q80X95;Q6NTA4;G3UYP1	Ras-related GTP-binding protein A;Ras-related GTP-binding protein B	Rraga;Rragb
0.899911	0.00692458	2.15961	P26516	26S proteasome non-ATPase regulatory subunit 7	Psmd7
0.899463	0.000382331	3.41756	Q9CZS1;G3UYH1;Q62148;G3UWP3;P24549;O35945;Q9JHW9	Aldehyde dehydrogenase X, mitochondrial	Aldh1b1
0.898908	1.48569e-05	4.82807	Q62167;P16381;Q61496;Q3V086	ATP-dependent RNA helicase DDX3X;Putative ATP-dependent RNA helicase Pl10	Ddx3x;D1Pas1
0.897683	0.00192274	2.71608	Q9JHJ0	Tropomodulin-3	Tmod3
0.897159	0.00950028	2.02226	E9Q912;E9Q6Q4		Rap1gds1
0.897141	0.00100298	2.99871	P54823	Probable ATP-dependent RNA helicase DDX6	Ddx6
0.896524	5.87588e-05	4.23093	Q78PY7;Q3TJ56;E9Q3E9	Staphylococcal nuclease domain-containing protein 1	Snd1
0.894579	0.0108071	1.96629	Q8BPX9	Solute carrier family 15 member 3	Slc15a3
0.892772	0.000210817	3.67609	Q9CQM8;O09167;D3YX47;D3Z4H7	60S ribosomal protein L21	Rpl21;Rpl21-ps6
0.891549	0.00118663	2.92568	P54729	NEDD8 ultimate buster 1	Nub1
0.891509	0.0294031	1.53161	Q9D0Y8;Q9D0Y8-2	39S ribosomal protein L52, mitochondrial	Mrpl52
0.891019	0.000482731	3.3163	P80313	T-complex protein 1 subunit eta	Cct7
0.883679	0.00139851	2.85434	P60766;P60766-1;G3UZM2;D3Z3L1;F2Z463;D3YX61;Q9ER71-2;Q8R527;Q9ER71	Cell division control protein 42 homolog	Cdc42
0.882004	0.00489741	2.31003	P52850	Bifunctional heparan sulfate N-deacetylase/N-sulfotransferase 2;Heparan sulfate N-deacetylase 2;Heparan sulfate N-sulfotransferase 2	Ndst2
0.881413	5.43769e-05	4.26459	P39688-2;D3YZ57;P39688;D3YVZ0;D3YZA2;P06240;E9Q696	Tyrosine-protein kinase Fyn	Fyn
0.881172	0.00272614	2.56445	E9Q5I9;Q9WVJ2;F6ZQQ3;E9Q0U1	26S proteasome non-ATPase regulatory subunit 13	Psmd13
0.880829	0.000128439	3.8913	Q9D0R8	Protein LSM12 homolog	Lsm12
0.880335	0.000176952	3.75214	P20934	Protein EVI2A	Evi2a
0.87954	0.00343705	2.46381	Q5SSZ5;Q5SSZ5-2;Q8CGB6-2;Q8CGB6-4;Q8CGB6;Q8CGB6-3;E9Q0S6	Tensin-3	Tns3
0.878928	0.0842726	1.07431	P51807	Dynein light chain Tctex-type 1	Dynlt1
0.876589	0.014582	1.83618	Q3UPL0-2;Q3UPL0;Q3UPL0-3	Protein transport protein Sec31A	Sec31a
0.873863	3.45812e-05	4.46116	Q61768;E9QAK5;P28738;P33175	Kinesin-1 heavy chain	Kif5b
0.873287	0.000286193	3.54334	Q8BMS9;A2APB1;A2AVI0	Ras association domain-containing protein 2	Rassf2
0.871161	0.0013047	2.88449	Q9CQA1	Trafficking protein particle complex subunit 5	Trappc5
0.870848	0.0201002	1.6968	Q7TMM9	Tubulin beta-2A chain	Tubb2a
0.864342	0.000905576	3.04308	Q8JZQ9	Eukaryotic translation initiation factor 3 subunit B	Eif3b
0.86303	0.000308223	3.51114	K3W4Q8;P18572-2;P18572;J3QP71	Basigin	Bsg
0.862656	0.0227704	1.64263	Q62376;Q62376-2	U1 small nuclear ribonucleoprotein 70 kDa	Snrnp70
0.862552	0.0363114	1.43996	Q9JIK5	Nucleolar RNA helicase 2	Ddx21
0.861653	0.000167817	3.77516	Q61093;E9Q7S3;E9Q802	Cytochrome b-245 heavy chain	Cybb
0.861042	0.150907	0.821289	P56379	6.8 kDa mitochondrial proteolipid	Mp68
0.859759	0.0759096	1.1197	Q91YS8;D3Z368;Q8BW96-2;Q8BW96-3;Q8BW96	Calcium/calmodulin-dependent protein kinase type 1	Camk1
0.859016	6.88628e-05	4.16202	Q60715-2;E9Q7B0		P4ha1
0.857856	7.79172e-06	5.10837	Q61462-2;Q61462	Cytochrome b-245 light chain	Cyba
0.857752	0.0584549	1.23318	E9QKV6;E9PWZ6;E9PZW8		Myo9b
0.855962	0.000695214	3.15788	F7CBP1;G3XA17;Q62448-2;Q62448;F6TW20;F7DAB1	Eukaryotic translation initiation factor 4 gamma 2	Eif4g2
0.855377	0.063837	1.19493	O55135;A6PWZ2;D6RG53;D6RJJ3;B1AZQ4	Eukaryotic translation initiation factor 6	Eif6
0.853047	0.00275506	2.55987	A2AUM6;P16254	Signal recognition particle 14 kDa protein;Signal recognition particle 14 kDa protein, N-terminally processed	Srp14
0.852111	0.000288015	3.54058	Q9CQD1	Ras-related protein Rab-5A	Rab5a
0.851231	0.0209517	1.67878	Q99020;Q80XR6;Q20BD0	Heterogeneous nuclear ribonucleoprotein A/B	Hnrnpab
0.845526	0.00134135	2.87246	Q8BGS7-2;Q8BGS7;D3Z5Y5;D3YX12	Choline/ethanolaminephosphotransferase 1	Cept1
0.844128	0.000669454	3.17428	Q921J2	GTP-binding protein Rheb	Rheb
0.841967	0.00582985	2.23434	A2AR26;Q3UDF0;A2AR27		Slc2a6
0.841364	0.000386672	3.41266	P40336;P40336-2	Vacuolar protein sorting-associated protein 26A	Vps26a
0.839598	0.000996984	3.00131	Q02105	Complement C1q subcomponent subunit C	C1qc
0.836963	0.000284762	3.54552	M0QWR5;Q6QLQ4	C-type lectin domain family 7 member A	Clec7a
0.834991	0.000733206	3.13477	P62849-2;P62849-3;P62849	40S ribosomal protein S24	Rps24
0.83379	0.0562276	1.25005	Q8CFA1-4;Q8CFA1-2;Q8CFA1;Q8CFA1-3;D3Z364	Interleukin-1 receptor-associated kinase-like 2	Irak2
0.833625	0.000209962	3.67786	Q9D1R9;D3YWC0	60S ribosomal protein L34	Rpl34
0.832036	0.00164335	2.78427	O70194	Eukaryotic translation initiation factor 3 subunit D	Eif3d
0.831431	0.000130837	3.88327	Q3UZ39;Q3UZ39-3	Leucine-rich repeat flightless-interacting protein 1	Lrrfip1
0.830859	1.56408e-06	5.80574	Q99MB1	Toll-like receptor 3	Tlr3
0.829094	9.77128e-05	4.01005	P06151;G5E8N5;D3Z736;D3YZQ9;D3YVR7;D3YZE4;P00342;D3Z7F0;P16125	L-lactate dehydrogenase A chain;L-lactate dehydrogenase	Ldha
0.826423	0.00257666	2.58894	Q9ER39	Torsin-1A	Tor1a
0.82458	1.10209e-05	4.95778	Q6ZWU9	40S ribosomal protein S27	Rps27
0.823049	0.000187761	3.7264	P13020-2;P13020;A6PWS5	Gelsolin	Gsn
0.820841	0.000131199	3.88207	P62281	40S ribosomal protein S11	Rps11
0.819789	0.0394222	1.40426	Q9Z1Q5	Chloride intracellular channel protein 1	Clic1
0.817529	0.000778666	3.10865	Q921T2-2;F6YC07;Q921T2;Q921T2-3;E9PWW2;J3QQ40;D3YZP0;D3YZJ9;D3YXF8	Torsin-1A-interacting protein 1	Tor1aip1
0.816631	0.00982672	2.00759	D3YW48;O88456	Calpain small subunit 1	Capns1
0.815378	0.000417889	3.37894	Q8K124	Pleckstrin homology domain-containing family O member 2	Plekho2
0.814508	0.000830182	3.08083	P25911;P16277	Tyrosine-protein kinase Lyn	Lyn
0.810224	0.0128395	1.89145	Q99N69	Leupaxin	Lpxn
0.80942	0.00015701	3.80407	Q80ZX0;F6VJC5;F6YIN5		Sec24b
0.808591	0.00637758	2.19534	Q9WVA3	Mitotic checkpoint protein BUB3	Bub3
0.807649	1.70457e-05	4.76838	Q921H8;H3BKL5;H3BJZ9;Q8VCH0;H3BKA1;H3BJG8;H3BJC1	3-ketoacyl-CoA thiolase A, peroxisomal;3-ketoacyl-CoA thiolase B, peroxisomal	Acaa1a;Acaa1b
0.806506	0.017913	1.74683	Q80UP3;A2AHJ7;A2AHK0;D3Z519;D3Z2W1;D3YWQ0	Diacylglycerol kinase zeta	Dgkz
0.806294	0.00229813	2.63863	P09671	Superoxide dismutase [Mn], mitochondrial	Sod2
0.804344	9.18366e-05	4.03698	P49962;D3YZX8	Signal recognition particle 9 kDa protein	Srp9
0.80389	0.0570314	1.24389	P43024;Q9DCW5	Cytochrome c oxidase subunit 6A1, mitochondrial;Cytochrome c oxidase subunit 6A, mitochondrial	Cox6a1
0.801632	0.00328954	2.48286	Q9JL15;A8DIL0;Q8C6H0	Galectin-8	Lgals8
0.801269	0.00201872	2.69492	P62137	Serine/threonine-protein phosphatase PP1-alpha catalytic subunit	Ppp1ca
0.798556	0.00213412	2.67078	P55772;D6RHQ2;Q8CDV7;D6RFA9;F7B9M9	Ectonucleoside triphosphate diphosphohydrolase 1	Entpd1
0.795965	0.000536004	3.27083	F8VQC1;E9Q740	Signal recognition particle subunit SRP72	Srp72
0.791159	0.0015789	2.80165	P63328-2;P63328;E9Q6P2;G3X8U7;P48453-2;E0CZ78;P48453;P48455	Serine/threonine-protein phosphatase 2B catalytic subunit alpha isoform;Serine/threonine-protein phosphatase;Serine/threonine-protein phosphatase 2B catalytic subunit beta isoform	Ppp3ca;Ppp3cb
0.789434	7.64045e-05	4.11688	O70145	Neutrophil cytosol factor 2	Ncf2
0.78779	0.000762382	3.11783	P62264;D3YVF4;D3Z7I1	40S ribosomal protein S14	Rps14
0.786926	0.000405967	3.39151	Q8R5H1-5;Q8R5H1-2;Q8R5H1;Q8R5H1-3;Q8R5H1-4	Ubiquitin carboxyl-terminal hydrolase 15	Usp15
0.785942	0.014023	1.85316	O35955	Proteasome subunit beta type-10	Psmb10
0.784538	3.51294e-05	4.45433	O55013	Trafficking protein particle complex subunit 3	Trappc3
0.782891	0.000950455	3.02207	P84078;P61205;Q8BSL7;A2A6T9	ADP-ribosylation factor 1;ADP-ribosylation factor 3;ADP-ribosylation factor 2	Arf1;Arf3;Arf2
0.780205	0.00916924	2.03767	D3YTQ9;P62843;F7ANJ3	40S ribosomal protein S15	Rps15
0.779725	0.00212891	2.67184	Q9DCH4	Eukaryotic translation initiation factor 3 subunit F	Eif3f
0.777222	0.00213615	2.67037	A2A6Z2;Q6SJQ7-2;Q6SJQ7;Q6SJQ7-3;Q8VCH2	CMRF35-like molecule 1	Cd300lf
0.775742	0.0156384	1.80581	D0QMC3	Myeloid cell nuclear differentiation antigen-like protein	Mndal
0.774161	0.0349337	1.45675	Q922F4	Tubulin beta-6 chain	Tubb6
0.771416	0.0979113	1.00917	Q3TIR1-3;Q3TIR1;Q3TIR1-2;J3QNW4	Trafficking protein particle complex subunit 13	Trappc13
0.769035	0.00560371	2.25152	Q64152-2;Q64152	Transcription factor BTF3	Btf3
0.768763	0.00683578	2.16521	Q922Y1	UBX domain-containing protein 1	Ubxn1
0.766438	0.078224	1.10666	P40237;A2AIJ1;A2AIJ2	CD82 antigen	Cd82
0.766324	0.00536357	2.27055	P62267	40S ribosomal protein S23	Rps23
0.764985	0.00141392	2.84958	Q3TGG2;Q7TQH0-2;Q7TQH0-3;Q7TQH0;E9Q5Q0;J3QP59	Ataxin-2-like protein	Atxn2l
0.76471	0.00337595	2.4716	P97465	Docking protein 1	Dok1
0.761361	0.00963541	2.01613	P16045	Galectin-1	Lgals1
0.760837	0.234907	0.629105	Q99J83	Autophagy protein 5	Atg5
0.759458	9.47232e-05	4.02354	Q9JJI8	60S ribosomal protein L38	Rpl38
0.759391	0.00368551	2.4335	E9PUE7;Q5SSL4;Q5SSL4-2;Q5SSL4-4;Q5SSL4-3;H3BJY3;H3BL84;H3BKT3;H3BKV6;Q6PAJ1	Active breakpoint cluster region-related protein	Abr
0.757954	0.357193	0.447097	Q9CSN1	SNW domain-containing protein 1	Snw1
0.756652	0.000395219	3.40316	Q9Z0N1;Q9Z0N2;A2AAW9	Eukaryotic translation initiation factor 2 subunit 3, X-linked;Eukaryotic translation initiation factor 2 subunit 3, Y-linked	Eif2s3x;Eif2s3y
0.754059	0.00076019	3.11908	Q8BUE4;Q8BUE4-2	Apoptosis-inducing factor 2	Aifm2
0.753305	0.00711034	2.14811	Q8BVL3;D3Z7S9;H3BKQ6;D3Z3J1;H3BKG9	Sorting nexin-17	Snx17
0.751285	0.0111489	1.95277	Q9Z1D1	Eukaryotic translation initiation factor 3 subunit G	Eif3g
0.751164	0.00278255	2.55556	E9Q4K7;Q9EQW7;F8VQ75		Kif13b
0.750026	0.0562045	1.25023	Q9CQL4	39S ribosomal protein L20, mitochondrial	Mrpl20
0.750001	0.0554613	1.25601	Q6P5B5;Q9WVR4	Fragile X mental retardation syndrome-related protein 2	Fxr2
0.748854	3.53466e-05	4.45165	P62830;A2A6F8	60S ribosomal protein L23	Rpl23
0.746003	0.000142766	3.84537	Q9D662;A2ANA0;A2AN98;A2AN99;A2AN97	Protein transport protein Sec23B	Sec23b
0.745667	0.00573159	2.24173	P11930	Nucleoside diphosphate-linked moiety X motif 19, mitochondrial	Nudt19
0.744233	0.0694243	1.15849	Q63850	Nuclear pore glycoprotein p62	Nup62
0.743561	0.0050805	2.29409	Q5D0E0;O88351;F6ULQ4	Inhibitor of nuclear factor kappa-B kinase subunit beta	Ikbkb
0.742336	0.0101246	1.99462	O70310;Q8CFK1;A2AJH3;O70311	Glycylpeptide N-tetradecanoyltransferase 1	Nmt1
0.741985	0.000401182	3.39666	Q09014;F8WH69	Neutrophil cytosol factor 1	Ncf1
0.741622	0.00684121	2.16487	Q78XF5	Oligosaccharyltransferase complex subunit OSTC	Ostc
0.739913	0.000149416	3.8256	P07356;B0V2N7;B0V2N8;B0V2N5	Annexin A2	Anxa2
0.738814	0.0135384	1.86843	Q9Z0S9	Prenylated Rab acceptor protein 1	Rabac1
0.738806	0.0103929	1.98326	Q9Z222;G3UWI7	UDP-GlcNAc:betaGal beta-1,3-N-acetylglucosaminyltransferase 2	B3gnt2
0.738392	0.000187854	3.72618	P61021	Ras-related protein Rab-5B	Rab5b
0.735514	0.0267011	1.57347	P25799-2;P25799-3;P25799;P25799-4;P25799-7;P25799-6;F6Z9G5;P25799-5	Nuclear factor NF-kappa-B p105 subunit;Nuclear factor NF-kappa-B p50 subunit	Nfkb1
0.734877	0.00119183	2.92379	Q8C3J5;Q5SRI3;D6RGU3;Q3TMS1	Dedicator of cytokinesis protein 2	Dock2
0.734761	0.00407487	2.38989	Q8VDW0;Q8VDW0-2;D6RHT5	ATP-dependent RNA helicase DDX39A	Ddx39a
0.734327	0.108966	0.96271	Q9D0T1;E9PZS4	NHP2-like protein 1	Nhp2l1
0.734202	0.348269	0.458085	Q7TQE6	Macoilin	Tmem57
0.733905	0.00118908	2.92479	A2APX3;P21460	Cystatin-C	Cst3
0.733489	0.0250846	1.60059	P70429;P70429-2;F8WJB9;E9PVP4	Ena/VASP-like protein	Evl
0.729763	0.000898757	3.04636	Q3U466;D6RE34;F6SXC2		Cln6
0.729537	0.0018819	2.7254	G3X9K9;G3UXZ5;P97371;G3UWN9;G3UXY0	Proteasome activator complex subunit 1	Psme1
0.729489	0.000396794	3.40143	P62918	60S ribosomal protein L8	Rpl8
0.728675	0.00311344	2.50676	Q3U2C5;Q3U2C5-2	E3 ubiquitin-protein ligase RNF149	Rnf149
0.72831	0.0590774	1.22858	O54962	Barrier-to-autointegration factor	Banf1
0.726524	0.00276611	2.55813	P62245;F8WJ41;D3Z712;D3YVB4	40S ribosomal protein S15a	Rps15a
0.72411	0.00175478	2.75578	Q3KNM2;F6W8T3	E3 ubiquitin-protein ligase MARCH5	38412
0.72372	6.22876e-05	4.2056	P35278;Q8C266;A2A5F5;A2A5F6	Ras-related protein Rab-5C	Rab5c
0.722721	0.0130732	1.88362	Q6PHZ2-2;Q6PHZ2-4;Q6PHZ2;Q6PHZ2-5;E9Q1V9;E9Q1T1;E9PXV3;E9Q1W0;Q8CCM0;P11798;F8WIS9;F6ZIE1;F6RWZ9;F7A856;E9QAJ4;D6RDQ8;E9PYZ8;F6WHR9	Calcium/calmodulin-dependent protein kinase type II subunit delta	Camk2d
0.720455	0.0171636	1.76539	Q9CQ65	S-methyl-5-thioadenosine phosphorylase	Mtap
0.720142	0.0425555	1.37104	P12815	Programmed cell death protein 6	Pdcd6
0.718748	0.000827079	3.08245	Q9JL26;A2AB60;Q9JL26-2;G3UWI1	Formin-like protein 1	Fmnl1
0.718204	0.000184582	3.73381	Q8K2C7;Q8K2C7-2	Protein OS-9	Os9
0.716871	0.00245092	2.61067	Q9DBW0;H9H9R5	Cytochrome P450 4V2	Cyp4v2
0.715787	0.042208	1.3746	Q3UQ44	Ras GTPase-activating-like protein IQGAP2	Iqgap2
0.712632	0.00398717	2.39934	Q8BMT4-2;Q8BMT4;Q8BMT4-3;D3Z755	Leucine-rich repeat-containing protein 33	Lrrc33
0.712249	0.000842125	3.07462	Q9Z2G6;Q9Z2G6-2;J3QJX3	Protein sel-1 homolog 1	Sel1l
0.710649	0.000851862	3.06963	P14576;E9PXC0;P14576-2	Signal recognition particle 54 kDa protein	Srp54;Srp54c
0.710648	0.075695	1.12093	P62317;D3Z5N9	Small nuclear ribonucleoprotein Sm D2	Snrpd2;Gm5449
0.709887	0.00367313	2.43496	Q9CQW9;E9Q0C7	Interferon-induced transmembrane protein 3	Ifitm3
0.708585	0.000415297	3.38164	A2AF47;A2AF67;A2AF65	Dedicator of cytokinesis protein 11	Dock11
0.702024	4.18147e-05	4.37867	Q3TYS2;E9PZ42;E9Q3W5	Uncharacterized protein C17orf62 homolog
0.700822	0.148976	0.826885	Q9EP52	Twisted gastrulation protein homolog 1	Twsg1
0.699761	0.00105891	2.97514	P11688	Integrin alpha-5;Integrin alpha-5 heavy chain;Integrin alpha-5 light chain	Itga5
0.69953	0.000113348	3.94559	Q8CDG3-2;Q8CDG3	Deubiquitinating protein VCIP135	Vcpip1
0.698748	0.0114258	1.94211	P62046	Leucine-rich repeat and calponin homology domain-containing protein 1	Lrch1
0.696755	0.00124212	2.90584	D3Z3W9;F8VQ94		Pira2
0.694883	0.00192195	2.71626	Q8BPU7;Q8BPU7-2;Q8BPU7-3;Q8BPU7-4	Engulfment and cell motility protein 1	Elmo1
0.694296	0.00276539	2.55824	Q3TJ55;Q80W45;Q00262;D3YY94	Syntaxin-2	Stx2
0.693622	0.0005086	3.29362	Q9ES56	Trafficking protein particle complex subunit 4	Trappc4
0.692318	0.00085934	3.06583	D3Z3R1;Q6ZWZ4;D3YW41;P47964;D3YX71	60S ribosomal protein L36	Gm5745;Rpl36;Rpl36-ps3
0.692275	0.0035293	2.45231	Q3UJB9;G5E896;D6RE33;Q3UJB9-2;F6ZJ27	Enhancer of mRNA-decapping protein 4	Edc4
0.691052	0.000256713	3.59055	P12970;D3YVE6;L7N202;D3YXT4;D3YU93;F6U2H0;F6ZVW4;F6VBB8;F6TIC7;F6YI27;F6SSI5	60S ribosomal protein L7a	Rpl7a;Rpl7a-ps10;Gm5619;Rpl7a-ps3;Rpl7a-ps5;Gm5459;Gm4978;Rpl7a-ps8;Gm17415
0.688863	0.000314216	3.50277	Q9DBJ1;O70250	Phosphoglycerate mutase 1	Pgam1
0.688478	0.00096532	3.01533	Q8R1B4	Eukaryotic translation initiation factor 3 subunit C	Eif3c
0.686875	0.000164275	3.78443	Q8C845;Q9D8Y0;Q9D4J1	EF-hand domain-containing protein D2	Efhd2
0.686284	0.0272443	1.56472	P63260;B1ATY1;G3UYG0	Actin, cytoplasmic 2;Actin, cytoplasmic 2, N-terminally processed	Actg1
0.682618	0.0497784	1.30296	E9PVJ6;E9Q4I1;E9Q612	Receptor-type tyrosine-protein phosphatase O	Ptpro
0.678507	0.00243028	2.61434	Q9WUN2	Serine/threonine-protein kinase TBK1	Tbk1
0.678104	0.00662146	2.17905	Q64430;A2AG68;B1AQ57;Q64446	Copper-transporting ATPase 1	Atp7a
0.67674	0.0811082	1.09094	P26954;P26955	Interleukin-3 receptor class 2 subunit beta	Csf2rb2
0.675593	2.39681e-05	4.62037	P24668	Cation-dependent mannose-6-phosphate receptor	M6pr
0.674811	0.00966018	2.01501	Q4LDD4-3;Q4LDD4-2;Q4LDD4;E9PUB0;F6XBJ8;D3YWW7	Arf-GAP with Rho-GAP domain, ANK repeat and PH domain-containing protein 1	Arap1
0.673687	0.00845668	2.0728	Q80WQ2	Protein VAC14 homolog	Vac14
0.669372	0.0478518	1.3201	Q8R050-2;Q8R050;Q149F3	Eukaryotic peptide chain release factor GTP-binding subunit ERF3A	Gspt1
0.66768	0.000708826	3.14946	P61358;E9PV49;A2A4Q0	60S ribosomal protein L27	Rpl27;Gm4825
0.666933	0.0627478	1.2024	Q9R0P3;H3BKH6;H3BJP2;H3BLJ9;H3BJL6;H3BK43;H3BJC6;H3BL99	S-formylglutathione hydrolase	Esd
0.666904	0.00108158	2.96594	Q2TPA8;B1AX78;B1AX77	Hydroxysteroid dehydrogenase-like protein 2	Hsdl2
0.666373	7.79584e-05	4.10814	Q9CQB5;D3Z3X4	CDGSH iron-sulfur domain-containing protein 2	Cisd2
0.664436	0.00185938	2.73063	Q9QXB9	Developmentally-regulated GTP-binding protein 2	Drg2
0.66186	0.0120675	1.91838	P80316;E0CZA1	T-complex protein 1 subunit epsilon	Cct5
0.660386	0.00517278	2.28628	P59764	Dedicator of cytokinesis protein 4	Dock4
0.658309	6.47139e-05	4.189	P58137;Q8BZR4;G3UXJ8	Acyl-coenzyme A thioesterase 8	Acot8
0.657956	0.00199029	2.70108	P35980;G3UZJ6;G3UZK4;G3UYV6;G3UX28	60S ribosomal protein L18	Rpl18
0.657031	0.00677045	2.16938	P23116	Eukaryotic translation initiation factor 3 subunit A	Eif3a
0.656908	0.0239958	1.61986	P11680	Properdin	Cfp
0.656005	0.0390098	1.40883	Q6DFW0;Q3U3D8;A2ANZ2	Protein C9orf72 homolog	3110043O21Rik
0.655623	0.412504	0.384571	Q9Z2L6	Multiple inositol polyphosphate phosphatase 1	Minpp1
0.654232	0.0441374	1.35519	F8WGT1;Q68FL4;E9PV16;Q68FL4-2;F8WI65;H3BKT5;D3YX97;H3BL31;D3YYM7;E9PX77;F7ATQ6;D3Z2Q0	Adenosylhomocysteinase;Putative adenosylhomocysteinase 3	Ahcyl2
0.65278	0.029802	1.52575	P46467	Vacuolar protein sorting-associated protein 4B	Vps4b
0.652186	0.109639	0.960034	P68040	Guanine nucleotide-binding protein subunit beta-2-like 1	Gnb2l1
0.651713	0.0418517	1.37829	E0CY07;Q9CR64-2;Q9CR64	Protein kish-A	Tmem167;Tmem167a
0.650224	4.64301e-05	4.3332	P05064;A6ZI44;Q9CPQ9;A6ZI46;D3YWI1;D3YV98;D3Z510;A6ZI47	Fructose-bisphosphate aldolase A;Fructose-bisphosphate aldolase	Aldoa;Aldoart1
0.649663	0.254726	0.593927	Q8BJW6-2;Q8BJW6;D3YZZ6	Eukaryotic translation initiation factor 2A	Eif2a
0.648547	0.0200794	1.69725	Q9CZ30;Q9CZ30-2;B1AYJ9	Obg-like ATPase 1	Ola1
0.647421	0.00171694	2.76525	Q9CZM2;E9QAZ2;B8JKK2;E9Q1X1	60S ribosomal protein L15;Ribosomal protein L15	Rpl15;Gm10020;Gm8420
0.646273	0.00386904	2.4124	P11983;P11983-2;F2Z483	T-complex protein 1 subunit alpha	Tcp1
0.645431	0.231836	0.63482	D3YYK8;E9Q6X0;Q8R001-2;Q8R001;Q3TG90;D3YUY6;D3Z6G3;Q6PER3	Microtubule-associated protein RP/EB family member 2	Mapre2
0.64455	1.27631e-05	4.89405	Q9JME7	Trafficking protein particle complex subunit 2-like protein	Trappc2l
0.644021	0.00884869	2.05312	D3YXL1;Q9CQA9;D3Z2W9;Q8C373	Cancer-related nucleoside-triphosphatase homolog	Ntpcr
0.643782	0.00312972	2.50449	P57787;B1ATM2;B1ATM1	Monocarboxylate transporter 4	Slc16a3
0.642187	0.00607371	2.21655	P62301	40S ribosomal protein S13	Rps13
0.641621	0.00636177	2.19642	Q6P6J9	Thioredoxin domain-containing protein 15	Txndc15
0.641426	0.0123148	1.90957	Q9R007-1;Q9R007-2;Q9R007	C-type lectin domain family 5 member A	Clec5a
0.640229	0.325771	0.487088	Q99NB9;G5E866	Splicing factor 3B subunit 1	Sf3b1
0.639545	0.00011922	3.92365	P62754	40S ribosomal protein S6	Rps6
0.639036	0.0231056	1.63628	Q99JX4;A2A702;A2A701	Eukaryotic translation initiation factor 3 subunit M	Eif3m
0.638103	0.00241354	2.61735	Q8BVW3;Q8BVW3-2;Q8BVW3-3	Tripartite motif-containing protein 14	Trim14
0.637284	0.00763337	2.11728	Q99J56	Derlin-1	Derl1
0.637213	0.00554207	2.25633	Q921L3	Transmembrane and coiled-coil domain-containing protein 1	Tmco1
0.635269	0.000907393	3.0422	P97484;E9Q6M9	Leukocyte immunoglobulin-like receptor subfamily B member 3	Lilrb3
0.633265	0.00119022	2.92437	Q810B6;Q810B6-2;REV__Q8CIL4	Ankyrin repeat and FYVE domain-containing protein 1	Ankfy1
0.632514	0.000247029	3.60725	P25444;L7N240;D3YVC1;D3YWJ3;D3Z659;J3QMG5;L7N453;D3Z536;E9Q1N8;F6YTZ4;J3QM94	40S ribosomal protein S2	Rps2;Gm6139;Rps2-ps6;Gm5786;Gm8225;Gm18025;Gm6576;Gm5070
0.631317	0.00425506	2.37109	P80317;E9QPA6;Q61390;B1AT05	T-complex protein 1 subunit zeta	Cct6a
0.630827	0.0648134	1.18833	P62141	Serine/threonine-protein phosphatase PP1-beta catalytic subunit	Ppp1cb
0.630194	0.0139476	1.8555	Q8VC19;D6RGR8	5-aminolevulinate synthase, nonspecific, mitochondrial	Alas1
0.629678	0.0287186	1.54184	F6RJV6;Q9JJK2	LanC-like protein 2	Lancl2
0.629515	0.00223146	2.65141	P17751;H7BXC3	Triosephosphate isomerase	Tpi1
0.628423	0.0101367	1.9941	G3UZJ5;P67871;G3UZA4;G3UZX4;G3UWU5;G3UXG7;G3UXU2	Casein kinase II subunit beta	Csnk2b
0.628078	0.00298373	2.52524	Q9D081	UDP-N-acetylglucosamine transferase subunit ALG14 homolog	Alg14
0.627587	0.116534	0.933548	Q6SJQ5;A2A7W1;L7N207;A2A7W0	CMRF35-like molecule 3	Cd300lh;Gm11709
0.627334	0.0506736	1.29522	Q9CQJ6;E9Q0G1	Density-regulated protein	Denr
0.626905	5.68894e-05	4.24497	P62889	60S ribosomal protein L30	Rpl30
0.625444	0.00524066	2.28061	Q922H2	[Pyruvate dehydrogenase [lipoamide]] kinase isozyme 3, mitochondrial	Pdk3
0.625428	0.00237969	2.62348	Q9ES74	Serine/threonine-protein kinase Nek7	Nek7
0.624508	0.00106943	2.97085	P83940	Transcription elongation factor B polypeptide 1	Tceb1
0.6215	0.000429545	3.36699	Q3UJU9;A3KGH5;A3KGH6;A3KGH7	Regulator of microtubule dynamics protein 3	Rmdn3
0.61962	0.000115317	3.9381	P99029-2;P99029;G3UZJ4;H3BJQ7	Peroxiredoxin-5, mitochondrial	Prdx5
0.618323	0.0100965	1.99583	P62242	40S ribosomal protein S8	Rps8
0.618227	0.00122619	2.91144	Q8CBY8;Q8CBY8-2	Dynactin subunit 4	Dctn4
0.616122	0.0227381	1.64324	P49586;D3Z3T5;Q811Q9-2;Q811Q9	Choline-phosphate cytidylyltransferase A	Pcyt1a
0.615662	0.00146349	2.83461	Q9EQH3	Vacuolar protein sorting-associated protein 35	Vps35
0.614141	0.000849527	3.07082	E9Q132;Q8BP67;F6RSK3	60S ribosomal protein L24	Rpl24
0.61316	8.24921e-05	4.08359	P14115	60S ribosomal protein L27a	Rpl27a
0.611142	0.0329449	1.48221	Q3UGP8	Putative Dol-P-Glc:Glc(2)Man(9)GlcNAc(2)-PP-Dol alpha-1,2-glucosyltransferase	Alg10b
0.610736	0.0605046	1.21821	Q9CYG7;Q9CYG7-2	Mitochondrial import receptor subunit TOM34	Tomm34
0.60955	0.0293035	1.53308	Q9JI11;A2A5M9;Q8CDG4;F7BYZ4;Q9JI10-2	Serine/threonine-protein kinase 4;Serine/threonine-protein kinase 4 37kDa subunit;Serine/threonine-protein kinase 4 18kDa subunit	Stk4
0.608469	0.0088388	2.05361	P97855	Ras GTPase-activating protein-binding protein 1	G3bp1
0.605425	0.0387409	1.41183	Q8BXJ9;D6RH67;A2AQ56	Transmembrane protein 62	Tmem62
0.605293	0.0395317	1.40305	Q9QZL0;G3X8V8;E9PZP3	Receptor-interacting serine/threonine-protein kinase 3	Ripk3
0.605191	0.00735592	2.13336	P42932;H3BL49;H3BJB6;H3BLL1;H3BKG2;H3BKR8	T-complex protein 1 subunit theta	Cct8
0.604931	1.55941e-05	4.80704	Q9CR57	60S ribosomal protein L14	Rpl14
0.602962	0.0323498	1.49013	D3YWT0;Q9R0P6;D3Z569;D3YTS1	Signal peptidase complex catalytic subunit SEC11A	Sec11a
0.594887	0.000391043	3.40778	P27601;Q9D034	Guanine nucleotide-binding protein subunit alpha-13	Gna13
0.594656	0.0128566	1.89087	P56394	Cytochrome c oxidase copper chaperone	Cox17
0.593767	0.00435467	2.36104	Q58NB6	Dehydrogenase/reductase SDR family member 9	Dhrs9
0.592604	0.00548804	2.26058	Q8R5M8-4;Q8R5M8-3;Q8R5M8-2;Q8R5M8;E9PYN1;Q8R5M8-7;Q8R5M8-6;Q8R5M8-5;E0CY16	Cell adhesion molecule 1	Cadm1
0.591546	0.015577	1.80752	P80315;G5E839;G3UYW5;G3UXF3;G3UXG2	T-complex protein 1 subunit delta	Cct4
0.591252	0.000759971	3.1192	O09110-2;O09110;A2AGS2;P70236	Dual specificity mitogen-activated protein kinase kinase 3	Map2k3
0.590559	0.0508767	1.29348	O08529	Calpain-2 catalytic subunit	Capn2
0.589551	0.000115634	3.93691	Q9EPE9	Probable cation-transporting ATPase 13A1	Atp13a1
0.589439	0.103937	0.983228	Q8K363;F6ZX28	ATP-dependent RNA helicase DDX18	Ddx18
0.589127	0.0092012	2.03616	Q6ZWN5;F7CJS8;D3YWH9;Q9CXW7;D3Z673;D3YUV6	40S ribosomal protein S9	Rps9
0.587701	0.000767646	3.11484	Q6PHN9;Q923S9	Ras-related protein Rab-35	Rab35
0.584734	0.000372088	3.42935	Q9QZ06;A9JEI5;Q8C5G6;F7AT44	Toll-interacting protein	Tollip
0.582164	0.0371581	1.42995	Q9CQR6	Serine/threonine-protein phosphatase 6 catalytic subunit	Ppp6c
0.581872	0.00394826	2.40359	D3Z079;Q8K400;D3Z2Q2;Q8K400-2;F6WXQ4	Syntaxin-binding protein 5	Stxbp5
0.581271	0.00789936	2.10241	Q91VS7;E9QJW0;D3YU60;D3YVR3	Microsomal glutathione S-transferase 1	Mgst1
0.581159	0.0155167	1.8092	P17809	Solute carrier family 2, facilitated glucose transporter member 1	Slc2a1
0.58097	0.0447052	1.34964	G5E8J0;O35516;O35516-2;Q01705-2;Q01705-4;Q01705-3;Q01705	Neurogenic locus notch homolog protein 2;Notch 2 extracellular truncation;Notch 2 intracellular domain	Notch2
0.580706	0.0179932	1.74489	Q8BZN6-2;Q8BZN6;E9QM99;Q8BZN6-3	Dedicator of cytokinesis protein 10	Dock10
0.578652	0.00643817	2.19124	Q921F4;Q921F4-4	Heterogeneous nuclear ribonucleoprotein L-like	Hnrpll
0.578259	0.000264063	3.57829	D3YWD5;Q9D2V8;D3YYM9;D6RI23	Major facilitator superfamily domain-containing protein 10	Mfsd10
0.577472	4.7695e-05	4.32153	O54984	ATPase Asna1	Asna1
0.5765	0.0421455	1.37525	P60521	Gamma-aminobutyric acid receptor-associated protein-like 2	Gabarapl2
0.574892	0.109248	0.961588	Q792F9;Q00651	Integrin alpha-4	Itga4
0.571529	0.00601374	2.22086	Q91W53;Q91W53-2	Golgin subfamily A member 7	Golga7
0.571515	0.396564	0.401687	Q8R1M2	Histone H2A.J	H2afj
0.569897	0.0675388	1.17045	P58682;A2AHI8	Toll-like receptor 8	Tlr8
0.569547	0.00101326	2.99428	Q8VHE0	Translocation protein SEC63 homolog	Sec63
0.568869	9.63408e-05	4.01619	Q9QUI0;H3BL56;Q9CR99	Transforming protein RhoA	Rhoa;Rhoc
0.568727	0.0723552	1.14053	Q9D6Z1;F7CHQ7;A2APD7;F6U250;F6V095;E0CXZ0;F7CHP9;F6USW7	Nucleolar protein 56	Nop56
0.567198	0.0369365	1.43254	P83887;Q8VCK3	Tubulin gamma-1 chain;Tubulin gamma-2 chain	Tubg1;Tubg2
0.566265	0.000223498	3.65073	P35282	Ras-related protein Rab-21	Rab21
0.565462	0.00409473	2.38778	Q91X78;E9PUH5;E9PZB0	Erlin-1	Erlin1
0.56515	0.0118655	1.92572	Q8C570;A2ASC6	mRNA export factor	Rae1
0.563719	0.000400571	3.39732	P97351;D3Z6C3;D3Z7W7	40S ribosomal protein S3a	Rps3a;Rps3a2;Rps3a3
0.562158	0.00172794	2.76247	Q62230;G3X8X6;Q62230-3;H9KUZ3;Q62230-2;H9KUZ2	Sialoadhesin	Siglec1
0.561915	0.118545	0.926118	Q925U4	ER degradation-enhancing alpha-mannosidase-like protein 1	Edem1
0.560241	0.0238214	1.62303	Q3THE2;Q9CQ19;D3YV37;D3Z249	Myosin regulatory light chain 12B	Myl12b
0.559705	0.303397	0.517988	P97858;E0CZ89;P97858-2	Solute carrier family 35 member B1	Slc35b1
0.558602	3.56361e-05	4.44811	P62717;F6YJW4	60S ribosomal protein L18a	Rpl18a
0.558213	0.129177	0.888816	Q8CIE4;F6Z9X8		Parp10
0.557721	0.00982773	2.00755	E9Q9N6;E9PYX3;Q05512-3;Q05512-4;Q05512;F6ZS70;E9QMP6;Q3T9A3;Q05512-2;F7CVZ7;F6UY70;E9Q2J6;F7A3Q3;F6ZEX4;E9Q2G8;E9Q8H5;F7CRG8;Q8VHJ5;E9PZ55;Q8CIP4	Serine/threonine-protein kinase MARK2	Mark2
0.555937	0.00119801	2.92154	Q9Z1T1;Q9JME5;E9Q1S6	AP-3 complex subunit beta-1	Ap3b1
0.555492	0.00382828	2.417	Q3UFK8;D3Z5B2	FERM domain-containing protein 8	Frmd8
0.55365	0.313933	0.503163	Q9ESX5;F6YUI5;B7ZCL7;A2AN81	H/ACA ribonucleoprotein complex subunit 4	Dkc1
0.552354	0.00102898	2.98759	E9Q8I7;E9PZN0;E9Q3K1		Nfxl1
0.552333	0.025519	1.59314	Q9WTX2	Interferon-inducible double stranded RNA-dependent protein kinase activator A	Prkra
0.552278	0.00814986	2.08885	P09405	Nucleolin	Ncl
0.551678	0.00635558	2.19684	Q9CY57-5;Q9CY57-4;Q9CY57-3;E9PW20;Q9CY57-2;Q9CY57;D3YZA1;D3Z7T7	Chromatin target of PRMT1 protein	Chtop
0.55107	0.223269	0.651172	D6RFN5;O70131;D3YW25	Ninjurin-1	Ninj1
0.550046	0.0262522	1.58084	Q9D8B3	Charged multivesicular body protein 4b	Chmp4b
0.54821	0.000274328	3.56173	Q8BYI6;Q8BYI6-2;Q8BYI6-3	Lysophosphatidylcholine acyltransferase 2	Lpcat2
0.546907	0.219414	0.658736	Q9CX13	Protein cornichon homolog 4	Cnih4
0.546636	0.0529141	1.27643	Q9ESD6-2;Q9ESD6	CKLF-like MARVEL transmembrane domain-containing protein 7	Cmtm7
0.546315	0.0193369	1.71361	Q8VDP6	CDP-diacylglycerol--inositol 3-phosphatidyltransferase	Cdipt
0.543852	0.00745111	2.12778	Q9Z1Q9;G3UY93;G3UZ22;G3UYW2	Valine--tRNA ligase	Vars
0.543263	0.198536	0.70216	Q9D7S9	Charged multivesicular body protein 5	Chmp5
0.542618	0.019226	1.71611	Q9ERB0	Synaptosomal-associated protein 29	Snap29
0.540556	0.00724917	2.13971	Q9BCZ4	Selenoprotein S	Vimp
0.539169	0.0431121	1.3654	P32921-2;P32921	Tryptophan--tRNA ligase, cytoplasmic;T1-TrpRS;T2-TrpRS	Wars
0.538894	0.0694753	1.15817	D3Z286		Tmppe
0.537792	0.0291434	1.53546	Q922D8	C-1-tetrahydrofolate synthase, cytoplasmic;Methylenetetrahydrofolate dehydrogenase;Methenyltetrahydrofolate cyclohydrolase;Formyltetrahydrofolate synthetase	Mthfd1
0.535975	0.203223	0.692028	P82198	Transforming growth factor-beta-induced protein ig-h3	Tgfbi
0.53531	0.00713034	2.14689	P62911;A2AD25;P17932;F6WJV0	60S ribosomal protein L32	Rpl32
0.535244	0.00393222	2.40536	Q64516-1;B1ASZ3;Q64516-2;Q64516;Q8C635;Q9WU65	Glycerol kinase	Gyk;Gk
0.53423	0.00119228	2.92362	P81117	Nucleobindin-2;Nesfatin-1	Nucb2
0.53399	0.102472	0.989395	O70579	Peroxisomal membrane protein PMP34	Slc25a17
0.533174	0.00046929	3.32856	Q8VDD5;E9QPE7;F2Z494;O08638-2;O08638;Q8BXF2;Q91Z83;P13542;Q5SX39;Q5SX40	Myosin-9	Myh9
0.532861	0.00759224	2.11963	O35704	Serine palmitoyltransferase 1	Sptlc1
0.53235	0.0247734	1.60601	Q6DFX2;Q9CZ52-2;Q9CZ52	Anthrax toxin receptor 2	Antxr2
0.532087	0.15088	0.821369	Q8C2Q3;E9QL13;Q8C2Q3-2;J3QN51;J3QPT3;B0LM42;F7BGR7	RNA-binding protein 14	Rbm14
0.531761	0.0841453	1.07497	Q5FWI3	Transmembrane protein 2	Tmem2
0.529758	0.0220236	1.65711	E9PVC6;E9Q9E1;Q6NZJ6;Q6NZJ6-2;E9PVC5;E9Q770;D3Z439;D3YWY7;D3YWM1	Eukaryotic translation initiation factor 4 gamma 1	Eif4g1
0.528655	0.00277014	2.5575	P97363	Serine palmitoyltransferase 2	Sptlc2
0.528572	0.00232134	2.63426	O88487;Q3TPJ8;A2BFF8;A2BFF9;A2BFF5	Cytoplasmic dynein 1 intermediate chain 2	Dync1i2
0.527696	0.0810414	1.09129	Q3UHD6-2;Q3UHD6;E9PW30;F6QKA8	Sorting nexin-27	Snx27
0.525326	0.388432	0.410685	Q9D938	Transmembrane protein 160	Tmem160
0.525157	0.000250542	3.60112	P27659;Q9CQ09;E9PWZ3	60S ribosomal protein L3	Rpl3
0.522946	0.232286	0.633978	P99024	Tubulin beta-5 chain	Tubb5
0.522368	0.101128	0.99513	Q9QZM0	Ubiquilin-2	Ubqln2
0.522072	0.00371867	2.42961	Q3U0I3;P80318;E9Q133;F6Q609	T-complex protein 1 subunit gamma	Cct3
0.521354	0.0701798	1.15379	Q9ERU9	E3 SUMO-protein ligase RanBP2;Putative peptidyl-prolyl cis-trans isomerase	Ranbp2
0.519969	0.0105353	1.97735	Q9D1A2	Cytosolic non-specific dipeptidase	Cndp2
0.519553	0.0204057	1.69025	O55222;F6Q5Z1;D3YZA5	Integrin-linked protein kinase	Ilk
0.51867	0.00990625	2.00409	P62342	Selenoprotein T	Selt
0.515444	0.00129534	2.88762	Q6ZWX6	Eukaryotic translation initiation factor 2 subunit 1	Eif2s1
0.515338	0.52594	0.279064	Q3UJB0		Sf3b2
0.513967	0.0664629	1.17742	P62960;A2BGG7;Q9Z2C8-2;B2RUF0;Q9Z2C8	Nuclease-sensitive element-binding protein 1	Ybx1
0.51368	0.104671	0.980172	P63085;F6VEI7	Mitogen-activated protein kinase 1	Mapk1
0.512861	0.186881	0.728435	P68372;Q9D6F9;J3QNR5;A2AQ07;CON__ENSEMBL:ENSBTAP00000025008;G3UZR1	Tubulin beta-4B chain;Tubulin beta-4A chain	Tubb4b;Tubb4a;Tubb4b-ps1
0.511533	0.145518	0.837085	O55142	60S ribosomal protein L35a	Rpl35a
0.510737	0.0195047	1.70986	Q9DBN5;Q9DBN5-2;Q9DBN5-3;Q8BK80	Lon protease homolog 2, peroxisomal	Lonp2
0.510727	0.0183614	1.7361	P58242	Acid sphingomyelinase-like phosphodiesterase 3b	Smpdl3b
0.507902	0.00231412	2.63561	D3Z1Y1;Q9DBY1;E9QQ99;Q9DBY1-2;D3YZH4	E3 ubiquitin-protein ligase synoviolin	Syvn1
0.507365	0.0429694	1.36684	P63087;P63087-2	Serine/threonine-protein phosphatase PP1-gamma catalytic subunit	Ppp1cc
0.50685	0.244586	0.611569	Q569Z6;Q8BZN7;F7AB07;F6YH92	Thyroid hormone receptor-associated protein 3	Thrap3
0.505849	2.08801e-05	4.68027	O54734	Dolichyl-diphosphooligosaccharide--protein glycosyltransferase 48 kDa subunit	Ddost
0.505798	0.000957296	3.01895	Q64521;A2AQR0	Glycerol-3-phosphate dehydrogenase, mitochondrial	Gpd2
0.505307	0.0524087	1.2806	Q5SUH6;Q5SUH7;Q99KN9-2;Q99KN9	Clathrin interactor 1	Clint1
0.503275	0.00105406	2.97714	P63005;P63005-2;Q5SW16	Platelet-activating factor acetylhydrolase IB subunit alpha	Pafah1b1
0.502411	0.304494	0.516421	P00397;Q70YN3	Cytochrome c oxidase subunit 1	Mtco1;mt-Co1
0.501679	0.000257687	3.58891	Q9D8E6	60S ribosomal protein L4	Rpl4
0.500869	0.0280573	1.55195	O55029	Coatomer subunit beta	Copb2
0.500216	0.00082647	3.08277	Q8C522	Endonuclease domain-containing 1 protein	Endod1
0.499725	0.00107558	2.96836	Q9CXE7;E9PXY3;D3Z615;Q8C5H9;Q3V440;E9Q2J2	Transmembrane emp24 domain-containing protein 5	Tmed5
0.498189	0.10046	0.998006	A2BGN7;Q9D8X0	Protein MANBAL	Manbal
0.498159	0.0190053	1.72112	Q8VH51-2;Q8VH51;Q8VH51-3;E9Q8F0;F7AA45;B7ZD61;B7ZD63;B7ZD64;E9PZF9;D6RCZ8;E9Q999;D6RJ85	RNA-binding protein 39	Rbm39
0.496552	0.00498348	2.30247	Q9JMK0	Beta-1,4-galactosyltransferase 5	B4galt5
0.495911	0.00223363	2.65099	Q6ZWY3;D6RH49;D3YYB0	40S ribosomal protein S27-like;40S ribosomal protein S27	Rps27l
0.4948	0.0096266	2.01653	Q9CWJ9	Bifunctional purine biosynthesis protein PURH;Phosphoribosylaminoimidazolecarboxamide formyltransferase;IMP cyclohydrolase	Atic
0.491723	8.4848e-05	4.07136	P14148;F6XI62	60S ribosomal protein L7	Rpl7
0.491531	0.0595351	1.22523	Q6P8X1	Sorting nexin-6	Snx6
0.491301	0.00999171	2.00036	Q9D5T0	ATPase family AAA domain-containing protein 1	Atad1
0.490613	0.182419	0.738931	F8WIU9;Q5RKS2	Small integral membrane protein 7	Smim7
0.488915	0.163412	0.786716	Q80U58-3;Q3TQ29;Q80U58-2;Q3UR91;Q80U58;F6YD01;E9Q4Q6;E9PW51	Pumilio homolog 2	Pum2
0.488088	0.0558042	1.25333	Q91VI7	Ribonuclease inhibitor	Rnh1
0.487964	0.148509	0.828247	Q9D2V7	Coronin-7	Coro7
0.487866	0.0106988	1.97067	Q9JM13	Rab5 GDP/GTP exchange factor	Rabgef1
0.48708	0.430451	0.366076	Q8BH74;E9Q4V9	Nuclear pore complex protein Nup107	Nup107
0.486913	0.00887253	2.05195	P70206;P70208-2;P70208;Q80UG2;P70207	Plexin-A1	Plxna1
0.486026	0.00166216	2.77933	Q9CY58;Q9CY58-2;Q9CY58-3;Q9CY58-4	Plasminogen activator inhibitor 1 RNA-binding protein	Serbp1
0.483314	0.00323155	2.49059	I7HLV2;Q6ZWV3;P86048;B7FAU6	60S ribosomal protein L10;60S ribosomal protein L10-like	Rpl10;Rpl10l
0.483056	0.00548766	2.26061	Q9JHU4;F6ZX84	Cytoplasmic dynein 1 heavy chain 1	Dync1h1
0.480275	0.0263132	1.57983	Q9DBP5	UMP-CMP kinase	Cmpk1
0.479245	0.0184913	1.73303	Q9JKC8;H7BWY2;D3YXV9;D6RI63;D3YWU3;Q8R2R9	AP-3 complex subunit mu-1	Ap3m1
0.478639	0.0877012	1.05699	P60122;D3YW60	RuvB-like 1	Ruvbl1
0.478449	0.393433	0.405129	Q5IRJ6;Q5IRJ6-2;F8WHL1	Zinc transporter 9	Slc30a9
0.477076	0.0374005	1.42712	O09047	C3a anaphylatoxin chemotactic receptor	C3ar1
0.477067	0.0587289	1.23115	Q9R1W5	Calcitonin gene-related peptide type 1 receptor	Calcrl
0.476203	0.000208744	3.68039	E9Q555;F7A6H4;Q3U0U2	E3 ubiquitin-protein ligase RNF213	Rnf213
0.475612	0.354244	0.450697	Q9Z0W3;Q9Z0W3-2	Nuclear pore complex protein Nup160	Nup160
0.475322	0.000197166	3.70517	Q9CXW4;E9PYL9;D3Z3K1;A2BH06;E9PZB3;D3YW69	60S ribosomal protein L11	Rpl11;Gm10036;Gm10288;Gm5093;Gm7589
0.47451	0.174376	0.758513	A2ASZ8-2;A2ASZ8-3;A2ASZ8;A2ASZ8-4;A2ASZ8-5;F6RC04	Calcium-binding mitochondrial carrier protein SCaMC-2	Slc25a25
0.474508	0.0148175	1.82923	P61514	60S ribosomal protein L37a	Rpl37a
0.473779	0.268084	0.571729	F6XWD4;Q3UMT1	Protein phosphatase 1 regulatory subunit 12C	Ppp1r12c
0.473186	0.00960326	2.01758	Q61072;E9Q638	Disintegrin and metalloproteinase domain-containing protein 9	Adam9
0.473062	0.0229414	1.63938	Q61081	Hsp90 co-chaperone Cdc37	Cdc37
0.469339	0.00152727	2.81608	Q8BYU6	Torsin-1A-interacting protein 2	Tor1aip2
0.468699	0.00324856	2.48831	Q9D7N9	Adipocyte plasma membrane-associated protein	Apmap
0.46806	0.0406143	1.39132	P62855	40S ribosomal protein S26	Rps26
0.467767	0.0144714	1.83949	P55258;Q8K386;Q3TYH2;Q9CZT8;A2A7Z6	Ras-related protein Rab-8A	Rab8a
0.466627	0.00170714	2.76773	P20491	High affinity immunoglobulin epsilon receptor subunit gamma	Fcer1g
0.465716	0.356068	0.448466	Q924Z5	Translocating chain-associated membrane protein 2	Tram2
0.46469	0.00638715	2.19469	Q8BNI4;Q3U957;Q8BNI4-2;J3QMQ7;J3QMF4;Q9D8K3-2;Q9D8K3	Derlin-2	Derl2
0.463758	0.0494461	1.30587	Q6IRU2	Tropomyosin alpha-4 chain	Tpm4
0.463286	0.00169201	2.7716	Q9D7S7-2;Q9D7S7	60S ribosomal protein L22-like 1	Rpl22l1
0.462851	0.00135341	2.86857	Q9JJF9;F6RJQ8	Signal peptide peptidase-like 2A	Sppl2a
0.462713	0.00654153	2.18432	Q9WVL3;Q9WVL3-2	Solute carrier family 12 member 7	Slc12a7
0.462286	0.00013351	3.87449	Q91ZR1	Ras-related protein Rab-4B	Rab4b
0.460209	0.496995	0.303648	Q9Z2E1;Q9Z2E1-2	Methyl-CpG-binding domain protein 2	Mbd2
0.460159	0.00843323	2.07401	P35979;F8VQK7;D3YX33	60S ribosomal protein L12	Rpl12
0.46001	0.0522557	1.28187	Q9JLR9;J3QPX3	HIG1 domain family member 1A, mitochondrial	Higd1a;Gm9790
0.459945	0.0454298	1.34266	Q3UKC1;D3Z715;D3Z213	Tax1-binding protein 1 homolog	Tax1bp1
0.459925	0.101718	0.992601	Q9D850	Transmembrane protein 68	Tmem68
0.45843	0.00221984	2.65368	P47754;D6RCW7	F-actin-capping protein subunit alpha-2	Capza2
0.458188	0.0112785	1.94775	Q80TY0-4;Q80TY0-2;Q80TY0-3;A2AQ43;A2AQ44;A2AQ42;A2AQ45;A2AQ41;Q80TY0;Q80TY0-5;F6VVN1;A2AQ47;E9Q9P2;A2AQ39;P11260	Formin-binding protein 1	Fnbp1
0.457742	0.0132082	1.87915	A2ARZ7;P35285	Ras-related protein Rab-22A	Rab22a
0.455937	0.00581845	2.23519	O70152;A2BDX2;F8WII3	Dolichol-phosphate mannosyltransferase	Dpm1
0.455822	0.0384072	1.41559	Q0KL02-2;Q0KL02-3;Q0KL02;Q0KL02-4	Triple functional domain protein	Trio
0.455777	0.000287878	3.54079	P70245;A2AC29	3-beta-hydroxysteroid-Delta(8),Delta(7)-isomerase	Ebp
0.455598	0.000377994	3.42252	Q8CBM2;A2AL85;Q8BSY0;A2AL77;A2AL75;Q3TU40;A2AL81	Aspartyl/asparaginyl beta-hydroxylase	Asph
0.454389	0.0819577	1.08641	A2AKM2;A2AKM2-2;F7CPS1	Very-long-chain (3R)-3-hydroxyacyl-[acyl-carrier protein] dehydratase 4	Ptplad2
0.453653	0.0977553	1.00986	Q3V209-2;Q3V209;G8JL73	Transmembrane and ubiquitin-like domain-containing protein 2	Tmub2
0.452946	0.00967386	2.0144	Q8R1K1	Ubiquitin-associated domain-containing protein 2	Ubac2
0.452806	0.0114698	1.94044	E9Q9M5;Q3UJD6-2;J3KMM1;Q3UJD6	Ubiquitin carboxyl-terminal hydrolase;Ubiquitin carboxyl-terminal hydrolase 19	Usp19
0.451526	0.0124657	1.90428	Q9D1Q6	Endoplasmic reticulum resident protein 44	Erp44
0.45141	0.028764	1.54115	P41105;F6Z0X0	60S ribosomal protein L28	Rpl28
0.450901	0.00655427	2.18348	Q8K273	Membrane magnesium transporter 1	Mmgt1
0.450359	0.00138209	2.85946	P15920;P15920-2	V-type proton ATPase 116 kDa subunit a isoform 2	Atp6v0a2
0.449921	0.133434	0.874732	Q6A026;E9QPI5	Sister chromatid cohesion protein PDS5 homolog A	Pds5a
0.449461	0.0222269	1.65312	G3UZI3;E9PWV3;P18653;Q505N6;F6RQA2;F6Q8A4;Q8C0P0-2;Q8C0P0;E9Q6G0;E9Q4Q9;Q811L6-2;E9Q1M8;E9Q8S5;Q3U214;E9PWX8;E9QPR4;Q811L6	Ribosomal protein S6 kinase;Ribosomal protein S6 kinase alpha-1	Rps6ka1
0.448102	0.00179581	2.74574	Q99KV1	DnaJ homolog subfamily B member 11	Dnajb11
0.447586	0.00222926	2.65184	Q91V41;A2AL34	Ras-related protein Rab-14	Rab14
0.447438	0.00126728	2.89713	E9Q137;Q3TXY2		Tex264
0.446092	0.042522	1.37139	P61255;B1ARA3;B1ARA5;K4DI68	60S ribosomal protein L26	Rpl26;mCG_9098
0.446053	0.00549811	2.25979	Q8C0I1;A2AL50;H3BKN2;A2AL49;H3BIY5;H3BJ14	Alkyldihydroxyacetonephosphate synthase, peroxisomal	Agps
0.445865	0.0147605	1.8309	Q8R0J7	Vacuolar protein sorting-associated protein 37B	Vps37b
0.445709	0.0285408	1.54453	Q5F2E7;Q5F2E7-2	Nuclear fragile X mental retardation-interacting protein 2	Nufip2
0.445559	0.133947	0.873068	Q8VE37;Q6PFB2;A2CER2	Regulator of chromosome condensation	Rcc1
0.445274	0.00368881	2.43311	D3Z6W2;Q06180-2;Q06180	Tyrosine-protein phosphatase non-receptor type;Tyrosine-protein phosphatase non-receptor type 2	Ptpn2
0.444062	0.0126905	1.89652	Q3TFQ1;Q3UBW1	SPRY domain-containing protein 7	Spryd7
0.443075	0.234218	0.630381	Q6DFW4	Nucleolar protein 58	Nop58
0.442802	0.00344244	2.46313	Q8K1R3;Q8K1R3-2	Polyribonucleotide nucleotidyltransferase 1, mitochondrial	Pnpt1
0.442566	0.0954668	1.02015	Q8R1Z9;K4DI70;Q8R1Z9-2;Q8R1Z9-3;F6XTP0	RING finger protein 121	Rnf121
0.441414	0.00289855	2.53782	P70295;Q3U3K9	Ancient ubiquitous protein 1	Aup1
0.441028	0.012225	1.91275	Q8VBZ0	Dehydrogenase/reductase SDR family member on chromosome X homolog	Dhrsx
0.440746	0.0826966	1.08251	E9Q634	Unconventional myosin-Ie	Myo1e
0.439642	0.00820207	2.08608	Q80TN4;A2AS91	DnaJ homolog subfamily C member 16	Dnajc16
0.4396	0.133192	0.875522	E9Q1Z6		Gm14548
0.43901	0.0105158	1.97816	D3Z125;Q62393-2;E9PUA7;Q62393-3;D3Z7X7;Q62393;F8WHQ1;D3Z637;D3Z2U2	Tumor protein D52	Tpd52
0.438859	0.00590048	2.22911	P19253;E9Q5A0;D3YY61	60S ribosomal protein L13a	Rpl13a
0.436167	0.00169628	2.7705	P97820;F8VPL5;E9PVG7;Q62083;E9PUZ5;E9QAC6	Mitogen-activated protein kinase kinase kinase kinase 4	Map4k4
0.435471	0.0161592	1.79158	Q5RKN9;P47753	F-actin-capping protein subunit alpha-1	Capza1
0.433855	0.579668	0.23682	F7BTZ2;D3Z3A6;D3YXR5;Q60953-2;Q60953;D3Z2V0	Protein PML	Pml
0.433261	0.0175353	1.75609	P47963	60S ribosomal protein L13	Rpl13
0.433173	0.0254312	1.59463	O88958;D3Z0R5;G3UXF5;D3YWR1;Q9CRC9-2;Q9CRC9	Glucosamine-6-phosphate isomerase 1	Gnpda1
0.432925	0.0800707	1.09653	P60603	Reactive oxygen species modulator 1	Romo1
0.432539	0.00141936	2.84791	Q8VEH8;F6Z458;F7AQQ2	Endoplasmic reticulum lectin 1	Erlec1
0.432309	0.0979808	1.00886	P80314	T-complex protein 1 subunit beta	Cct2
0.430995	0.216596	0.66435	Q5EG47;Q8BRK8	5-AMP-activated protein kinase catalytic subunit alpha-1	Prkaa1
0.427949	0.0112675	1.94817	Q61112;Q61112-2	45 kDa calcium-binding protein	Sdf4
0.427385	0.104442	0.981123	Q93092	Transaldolase	Taldo1
0.426959	0.220903	0.655799	Q31125	Zinc transporter SLC39A7	Slc39a7
0.426691	0.000758234	3.1202	Q3TDQ1	Dolichyl-diphosphooligosaccharide--protein glycosyltransferase subunit STT3B	Stt3b
0.426279	0.101708	0.992645	Q8VD65	Phosphoinositide 3-kinase regulatory subunit 4	Pik3r4
0.425041	0.432291	0.364224	B1AQD3;Q64008;Q0PD20;B1AQD4;F7BE32	Ras-related protein Rab-34	Rab34
0.424785	0.00516741	2.28673	P35293	Ras-related protein Rab-18	Rab18
0.424657	0.28646	0.542936	Q3TRM4-2;Q3TRM4-3;Q3TRM4;Q3TRM4-4	Neuropathy target esterase	Pnpla6
0.424584	0.00519129	2.28472	Q8BLI4	Dermatan-sulfate epimerase	Dse
0.424507	0.00640488	2.19349	Q9CR67;Q9CZM3;E0CXY5	Transmembrane protein 33	Tmem33
0.424006	0.0116791	1.93259	Q8K1X1;G5E8J3	WD repeat-containing protein 11	Wdr11
0.422729	0.00262303	2.5812	P20029	78 kDa glucose-regulated protein	Hspa5
0.422626	0.338668	0.470226	Q3ULB1;Q921W7;P47226-2		Tes
0.422387	0.00092043	3.03601	P51660	Peroxisomal multifunctional enzyme type 2;(3R)-hydroxyacyl-CoA dehydrogenase;Enoyl-CoA hydratase 2	Hsd17b4
0.419425	0.0628864	1.20144	Q9JK48;Q9JK48-2	Endophilin-B1	Sh3glb1
0.418374	0.0492166	1.30789	Q99P88	Nuclear pore complex protein Nup155	Nup155
0.417107	0.00520165	2.28386	Q99KC8;F6TIL5;D3Z671;D3Z518;Q8BGF0	von Willebrand factor A domain-containing protein 5A	Vwa5a
0.41701	0.000101498	3.99354	Q3UVK0;F6TQS9;G8JL46;Q3UVK0-2	Endoplasmic reticulum metallopeptidase 1	Ermp1
0.416917	0.12507	0.902847	O35295	Transcriptional activator protein Pur-beta	Purb
0.41648	0.0756887	1.12097	Q9Z2U1;D3YX79	Proteasome subunit alpha type-5;Proteasome subunit alpha type	Psma5;Gm8394
0.415926	0.50244	0.298916	Q9JLJ5;Q4V9V3	Elongation of very long chain fatty acids protein 1	Elovl1
0.41476	0.117713	0.929176	E9QP49;G5E8Y6;Q99MS7-2;Q99MS7-4;Q99MS7-5;Q99MS7-3;Q99MS7	EH domain-binding protein 1-like protein 1	Ehbp1l1
0.411922	0.00418017	2.37881	P97449	Aminopeptidase N	Anpep
0.40815	0.0547038	1.26198	Q9DC50	Peroxisomal carnitine O-octanoyltransferase	Crot
0.407764	0.0120417	1.91931	Q8BHF7;F8WI04;F2Z427	CDP-diacylglycerol--glycerol-3-phosphate 3-phosphatidyltransferase, mitochondrial	Pgs1
0.407763	0.206022	0.686086	Q9CQ69;I7HPX6	Cytochrome b-c1 complex subunit 8	Uqcrq
0.407652	0.0210173	1.67742	B1ATZ0;B1ATZ1;Q99LI8;Q3UMA3;B1ATY9	Hepatocyte growth factor-regulated tyrosine kinase substrate	Hgs
0.407067	0.0101784	1.99232	Q8BKX1-4;Q8BKX1-3;B1AZ46;Q8BKX1-2;Q8BKX1	Brain-specific angiogenesis inhibitor 1-associated protein 2	Baiap2
0.406877	0.0474328	1.32392	Q8R2E9	ERO1-like protein beta	Ero1lb
0.406873	0.0522994	1.2815	Q4FE56;P70398;F8VPU6;E9PWA9;G3UY52;G3UZS3	Ubiquitin carboxyl-terminal hydrolase;Probable ubiquitin carboxyl-terminal hydrolase FAF-X	Usp9x
0.406162	0.0572194	1.24246	Q00519	Xanthine dehydrogenase/oxidase;Xanthine dehydrogenase;Xanthine oxidase	Xdh
0.405879	0.339708	0.468894	P68368	Tubulin alpha-4A chain	Tuba4a
0.405545	0.0532339	1.27381	A6X919;A6X919-2;A6X919-3;P0CW70	Probable C-mannosyltransferase DPY19L1	Dpy19l1
0.404842	8.35075e-05	4.07827	Q99KF1	Transmembrane emp24 domain-containing protein 9	Tmed9
0.404646	0.343196	0.464458	Q922J3-2;Q922J3;D3Z2Z1;F8WIA1;D3Z3M7;Q8C0S5;F6RCU2;F7CB97;F6RAY2	CAP-Gly domain-containing linker protein 1	Clip1
0.403882	0.140761	0.851518	Q8CEC0-3;Q8CEC0-2;Q8CEC0	Nuclear pore complex protein Nup88	Nup88
0.402885	0.00516917	2.28658	Q99L43;A2AMQ5;Q6PBC0;F6S4G2;P98191	Phosphatidate cytidylyltransferase 2	Cds2
0.401161	0.0437235	1.35928	P16879	Tyrosine-protein kinase Fes/Fps	Fes
0.400829	0.315163	0.501464	Q9CQF8	Ribosomal protein 63, mitochondrial	Mrp63
0.400381	0.00329821	2.48172	Q9CQY5;F6WHL0;A2ADH1;Q9CQY5-2;Q9CQY5-3;F6TBV1	Magnesium transporter protein 1	Magt1
0.399213	0.0679978	1.1675	Q9QYC7	Vitamin K-dependent gamma-carboxylase	Ggcx
0.397537	0.463403	0.334041	Q3UEB3-3;Q3UEB3-2;Q3UEB3	Poly(U)-binding-splicing factor PUF60	Puf60
0.397283	0.0701696	1.15385	Q9CQZ0;Q9CQZ0-2	ORM1-like protein 2	Ormdl2
0.39681	0.198767	0.701655	P18155	Bifunctional methylenetetrahydrofolate dehydrogenase/cyclohydrolase, mitochondrial;NAD-dependent methylenetetrahydrofolate dehydrogenase;Methenyltetrahydrofolate cyclohydrolase	Mthfd2
0.396739	0.048648	1.31294	Q60605-2;Q60605;Q8CI43	Myosin light polypeptide 6	Myl6
0.396691	0.000236942	3.62536	Q9EPL9;Q8C178;E9Q296;D3Z2N6;REV__Q5SV54;REV__Q5SV55;REV__Q9CSB4-2;REV__Q9CSB4	Peroxisomal acyl-coenzyme A oxidase 3;Acyl-coenzyme A oxidase	Acox3
0.396526	0.0996367	1.00158	P27546-2;P27546;E9QPW8;P27546-3;F7CK47;E9PZ43;P27546-4;E9PWC0;Q78TF3;F6XPV7;F6V4Z1	Microtubule-associated protein 4;Microtubule-associated protein	Map4
0.396113	0.105223	0.977888	Q64310;E0CXD9;F7CH13	Surfeit locus protein 4	Surf4
0.393972	0.00211998	2.67367	Q5RKZ7;Q5RKZ7-2;G3UYX9;Q5RKZ7-3;G3UWH1;G3UZD4	Molybdenum cofactor biosynthesis protein 1;Cyclic pyranopterin monophosphate synthase;Cyclic pyranopterin monophosphate synthase accessory protein	Mocs1
0.393278	0.0282914	1.54835	F6SVV1;P62082;J3QJZ3	40S ribosomal protein S7	Gm9493;Rps7;Gm6472
0.39319	0.00283185	2.54793	Q8BH02	Torsin-4A	Tor4a
0.393074	0.0431512	1.36501	P97370	Sodium/potassium-transporting ATPase subunit beta-3	Atp1b3
0.39213	0.290424	0.536968	Q9JIY0;F6XQM2;D3YVD1;F6VV25	Pleckstrin homology domain-containing family O member 1	Plekho1
0.39188	0.0089637	2.04751	Q542I8;P11835;M0QWA7;D3YYP8;D3Z1S4;M0QWJ6	Integrin beta;Integrin beta-2	Itgb2
0.39151	0.000707514	3.15027	Q8BGR2;D3YV62	Leucine-rich repeat-containing protein 8D	Lrrc8d
0.390741	0.637417	0.195577	Q9Z2N8;D3YVN1;F8WI57;Q99MR0	Actin-like protein 6A	Actl6a
0.390044	0.138202	0.859485	O35682	Myeloid-associated differentiation marker	Myadm
0.389866	0.0191589	1.71763	Q7TMB8;Q7TMB8-2;E9PZS0;G3UZI5	Cytoplasmic FMR1-interacting protein 1	Cyfip1
0.389125	0.05745	1.24071	P83882	60S ribosomal protein L36a	Rpl36a
0.388835	0.103705	0.984199	Q8BHD0;Q8BHC1	Ras-related protein Rab-39A	Rab39a
0.387927	0.042952	1.36702	P60867	40S ribosomal protein S20	Rps20
0.386952	0.0301847	1.52021	Q9Z1X2-2;Q9Z1X2;G3UYQ3;G3UWN0	Phosphatidylserine synthase 2	Ptdss2
0.386699	0.00887406	2.05188	P27773;F6Q404	Protein disulfide-isomerase A3	Pdia3
0.386485	0.0852068	1.06953	Q9DCM2	Glutathione S-transferase kappa 1	Gstk1
0.386121	0.00333951	2.47632	Q3TZM9;Q3TZM9-2;Q3TZM9-3;F6R220	GDP-Man:Man(3)GlcNAc(2)-PP-Dol alpha-1,2-mannosyltransferase	Alg11
0.384716	0.136452	0.865019	P97814	Proline-serine-threonine phosphatase-interacting protein 1	Pstpip1
0.384621	0.153263	0.814564	E9QN37;A1L314;Q5RKV8	Macrophage-expressed gene 1 protein	Mpeg1
0.383765	0.00138863	2.85741	Q80WG5	Leucine-rich repeat-containing protein 8A	Lrrc8a
0.382523	0.111323	0.953415	P47955;E9Q3T0	60S acidic ribosomal protein P1	Rplp1
0.38175	0.00363365	2.43966	Q62186;Q9D8L3	Translocon-associated protein subunit delta	Ssr4
0.381322	0.0679395	1.16788	Q8R1Q8	Cytoplasmic dynein 1 light intermediate chain 1	Dync1li1
0.380724	0.0676826	1.16952	P50637	Translocator protein	Tspo
0.380196	0.125474	0.901445	Q9JHF7	Hematopoietic prostaglandin D synthase	Hpgds
0.379788	0.119619	0.9222	Q9QYB1	Chloride intracellular channel protein 4	Clic4
0.379366	0.0492855	1.30728	A2AJI1;A2AJI0-2;A8Y5P4;A2AJI0;F6WF36	MAP7 domain-containing protein 1	Map7d1
0.379251	0.0683706	1.16513	Q76LS9-2;Q76LS9;Q76LS9-3	Protein FAM63A	Fam63a
0.378133	0.000593428	3.22663	D3YX52;P58749	Transmembrane 6 superfamily member 1	Tm6sf1
0.377711	0.00162727	2.78854	P14152;B1ATQ3	Malate dehydrogenase, cytoplasmic	Mdh1
0.377584	0.0150754	1.82173	P62702;Q3V1Z5	40S ribosomal protein S4, X isoform	Rps4x;Rps4y2
0.376612	0.0140153	1.8534	Q9EQH2	Endoplasmic reticulum aminopeptidase 1	Erap1
0.376419	0.0246362	1.60843	P28867;P28867-2;Q1MX41;Q1MX43;Q1MX40;Q1MX42;B1AYX8;Q8CAV6;REV__E9Q9T6;REV__Q6ZPL9;Q02111	Protein kinase C delta type;Protein kinase C delta type regulatory subunit;Protein kinase C delta type catalytic subunit	Prkcd
0.37565	0.223631	0.650468	P08030	Adenine phosphoribosyltransferase	Aprt
0.37542	0.00300236	2.52254	Q8K211;A8Y5P1	High affinity copper uptake protein 1	Slc31a1
0.375351	0.0467065	1.33062	A2AFY6;E9PVB5;A2AFY7;A2AGG1		Ttc17
0.374889	0.0458706	1.33847	D3YX34;E9Q586;O08788-2;E9Q3M3;O08788	Dynactin subunit 1	Dctn1
0.374745	0.0086661	2.06218	P63276	40S ribosomal protein S17	Rps17
0.374428	0.0194681	1.71068	F6SPK0;B1AWT7		Ube2j1
0.374163	3.91742e-05	4.407	Q9QUJ7-2;Q9QUJ7	Long-chain-fatty-acid--CoA ligase 4	Acsl4
0.373308	0.015809	1.8011	F8WJK8;Q99L47;E9Q1V0	Hsc70-interacting protein	St13
0.373109	0.161951	0.790617	Q9D8W7	OCIA domain-containing protein 2	Ociad2
0.37287	0.191129	0.718673	Q99L45;E0CXJ3	Eukaryotic translation initiation factor 2 subunit 2	Eif2s2
0.372133	0.257899	0.58855	Q99LH2	Phosphatidylserine synthase 1	Ptdss1
0.371701	0.0485719	1.31362	P14869;E9Q070;D3YVM5	60S acidic ribosomal protein P0	Rplp0;Gm8730
0.371152	0.00656678	2.18265	Q9Z210;D6RFQ2;D3Z0M4;E9PXK7;D6RFR1	Peroxisomal membrane protein 11B	Pex11b
0.371045	0.0132585	1.87751	Q8BH04;Q9Z2V4	Phosphoenolpyruvate carboxykinase [GTP], mitochondrial	Pck2
0.369721	0.501447	0.299775	Q3TFP0;Q9R0U0-3;Q9R0U0-2;Q9R0U0	Serine/arginine-rich splicing factor 10	Srsf10
0.368959	0.145477	0.837204	Q3V384;F6VT60;E9Q4K2	Lactation elevated protein 1	Lace1
0.366245	0.172889	0.762232	Q61387;E9PZS8	Cytochrome c oxidase subunit 7A-related protein, mitochondrial	Cox7a2l
0.365683	0.0125325	1.90196	Q8BLF1;Q8BYQ0;D6RGP7	Neutral cholesterol ester hydrolase 1	Nceh1
0.365347	0.19053	0.720036	Q3TLH4-5;Q3TLH4	Protein PRRC2C	Prrc2c
0.364316	0.20248	0.693617	Q8R5A3;F2Z3U3;F2Z4B7;G5E867;F2Z408	Amyloid beta A4 precursor protein-binding family B member 1-interacting protein	Apbb1ip
0.36394	0.288616	0.53968	Q8BUR4-2;Q8BUR4	Dedicator of cytokinesis protein 1	Dock1
0.359964	0.000464247	3.33325	Q6GQT9	Nodal modulator 1	Nomo1
0.359026	0.0816875	1.08784	P59481;D3Z4P2;F6QN75;J3QNZ7	VIP36-like protein	Lman2l
0.358676	0.136724	0.864155	P68254-2;P68254;F6YY69;F6VW30	14-3-3 protein theta	Ywhaq
0.357776	0.417807	0.379024	O09106;D3YYI8	Histone deacetylase 1;Histone deacetylase	Hdac1;Gm10093
0.357208	0.0460863	1.33643	E9Q1S3;Q01405	Protein transport protein Sec23A	Sec23a
0.356844	0.133516	0.874467	Q8BHE8	Uncharacterized protein C2orf47 homolog, mitochondrial
0.356601	0.00135718	2.86736	P47911;E9PUX4	60S ribosomal protein L6	Rpl6;Gm5428
0.354892	0.00477106	2.32139	Q9R0H0-2;Q9R0H0;A2A848	Peroxisomal acyl-coenzyme A oxidase 1	Acox1
0.353826	0.0972579	1.01208	G3X9K3;D3YYK9	Brefeldin A-inhibited guanine nucleotide-exchange protein 1	Arfgef1
0.353582	0.0780939	1.10738	Q91XV3	Brain acid soluble protein 1	Basp1
0.353148	0.0229181	1.63982	Q91V04	Translocating chain-associated membrane protein 1	Tram1
0.352564	0.0686526	1.16334	P62627;A2AVR9	Dynein light chain roadblock-type 1	Dynlrb1
0.352155	0.048147	1.31743	P62908;D3YV43	40S ribosomal protein S3	Rps3
0.352041	0.0704679	1.15201	Q3UMK4;D3YVV0;E9Q723		Ttc13
0.351814	0.0375872	1.42496	Q5XJF6;P53026;D3YXT2;D6RE43	Ribosomal protein;60S ribosomal protein L10a	Rpl10a
0.351111	0.0251706	1.59911	Q8VDI9;E0CZF3;E0CZ10;H3BJ25;H3BJK6	Alpha-1,2-mannosyltransferase ALG9	Alg9
0.349977	0.0810269	1.09137	Q8VE70;F8WI55;E0CY82	Programmed cell death protein 10	Pdcd10
0.349254	0.40554	0.391966	Q6P5D8	Structural maintenance of chromosomes flexible hinge domain-containing protein 1	Smchd1
0.348938	0.143225	0.843982	Q5XKN4	Protein jagunal homolog 1	Jagn1
0.348601	0.033228	1.4785	Q9DCW4	Electron transfer flavoprotein subunit beta	Etfb
0.347783	0.469762	0.328122	Q9ER80	Receptor-transporting protein 4	Rtp4
0.347592	0.405404	0.392112	D3Z0V9;Q9D666-2;Q9D666-4;Q9D666-3;Q9D666;F7BX07;Q3TSM1;F6XYA0;F6RMJ1;D3Z5Q2;D3Z3N5;D3YUW9	SUN domain-containing protein 1	Sun1
0.347513	0.0032426	2.48911	Q8BL66	Early endosome antigen 1	Eea1
0.346454	0.0333565	1.47682	O35350	Calpain-1 catalytic subunit	Capn1
0.346168	0.044507	1.35157	Q8VBZ3	Cleft lip and palate transmembrane protein 1 homolog	Clptm1
0.345477	0.0735051	1.13368	F8WIV2;Q60854;K7E6F1;E9Q3Y1;E9Q6X2;E9Q108;E9Q0P9;E9PYY0;E9PZQ9;E9Q4R2	Serpin B6	Serpinb6a;Serpinb6
0.345434	0.116055	0.935335	Q60737;A2ANR6;Q6NSS6	Casein kinase II subunit alpha	Csnk2a1
0.345305	0.0355403	1.44928	P55096	ATP-binding cassette sub-family D member 3	Abcd3
0.345216	0.0795831	1.09918	Q99LA2;E9PW12;Q9JMD0;B1AQG7;Q8CCB2;M0QWF0		Zfp207
0.344958	0.0866317	1.06232	Q3UDP0;E9QK95;Q3UDP0-2;B2RQV3	WD repeat-containing protein 41	Wdr41
0.344709	0.0796422	1.09886	Q9QUK3;D3Z2H1;D3Z332;D3Z3T9	Protein CLN8	Cln8
0.344495	0.0289591	1.53822	P08113;F7C312	Endoplasmin	Hsp90b1
0.344344	0.0117556	1.92976	Q6A099;Q6DFZ1;H3BLN1;H3BIX5;H3BLM8		Gbf1
0.343305	0.0137583	1.86143	Q8R079;D6RG73;Q8R079-2	Bifunctional apoptosis regulator	Bfar
0.342192	0.0151683	1.81906	Q6PD26	GPI transamidase component PIG-S	Pigs
0.341993	0.0294557	1.53083	P27808;J3JS24	Alpha-1,3-mannosyl-glycoprotein 2-beta-N-acetylglucosaminyltransferase	Mgat1
0.341397	0.253111	0.596689	Q8VDM6;Q8VDM6-2;Q8VDM6-3	Heterogeneous nuclear ribonucleoprotein U-like protein 1	Hnrnpul1
0.340455	0.241906	0.616354	E9PW69;Q9R1P0;E9Q0X0	Proteasome subunit alpha type;Proteasome subunit alpha type-4	Psma4
0.339747	0.106787	0.971481	O54774	AP-3 complex subunit delta-1	Ap3d1
0.338516	0.00239292	2.62107	E9Q421;Q8BXX3;Q9CXY9;Q8BL63	GPI-anchor transamidase	Pigk
0.338126	0.137409	0.861984	D3YWQ8;P23298;P16054	Protein kinase C eta type	Prkch
0.337467	0.0697444	1.15649	Q6ZWQ7		Spcs3
0.337012	0.140129	0.853473	Q8QZY1	Eukaryotic translation initiation factor 3 subunit L	Eif3l
0.335841	0.354571	0.450296	Q8K1I7	WAS/WASL-interacting protein family member 1	Wipf1
0.33583	0.00504438	2.29719	Q9CY50	Translocon-associated protein subunit alpha	Ssr1
0.335659	0.0180217	1.7442	Q8BU33;Q8BU33-3;Q8BU33-2	Acetolactate synthase-like protein	Ilvbl
0.335628	0.00197403	2.70465	Q9DBG6;A2ACG7	Dolichyl-diphosphooligosaccharide--protein glycosyltransferase subunit 2	Rpn2
0.334539	0.156245	0.806194	Q8C0P5;B1AVH5	Coronin-2A;Coronin	Coro2a
0.334524	0.141355	0.849688	P97821;D3Z220	Dipeptidyl peptidase 1;Dipeptidyl peptidase 1 exclusion domain chain;Dipeptidyl peptidase 1 heavy chain;Dipeptidyl peptidase 1 light chain	Ctsc
0.334473	0.0437612	1.35891	Q64337-2;Q64337;D3YZJ1;F6VD69	Sequestosome-1	Sqstm1
0.334381	0.269439	0.56954	D3Z656;Q8CHC4;E9Q7S0;F7BQW7;D3Z1M7	Synaptojanin-1	Synj1
0.334107	0.0521249	1.28296	Q8K1X4		Nckap1l
0.334023	0.254746	0.593892	Q6TEK5;Q0VGU5	Vitamin K epoxide reductase complex subunit 1-like protein 1	Vkorc1l1
0.333993	0.00143013	2.84462	O70252;D3YX62;D3YXN4	Heme oxygenase 2	Hmox2
0.332526	0.0134253	1.87207	Q8VCW4;E9PYK0;E9Q8P6;Q8VCW4-2	Protein unc-93 homolog B1	Unc93b1
0.33243	0.000481101	3.31776	Q3TAS6-2;Q3TAS6;D3Z665	ER membrane protein complex subunit 10	Emc10
0.33223	0.015931	1.79776	B2RXP1;Q8BVU0;E9QAU9;B7ZWM8;E9Q892;F6YZL6;F6Y466;E9Q0H5;F6TPH7	Leucine-rich repeat and calponin homology domain-containing protein 3	Lrch3
0.330984	0.106862	0.971176	Q80W54;I7HIP5	CAAX prenyl protease 1 homolog	Zmpste24
0.330938	0.0413322	1.38371	Q9ESP1	Stromal cell-derived factor 2-like protein 1	Sdf2l1
0.33071	0.0700796	1.15441	Q9CYA0	Cysteine-rich with EGF-like domain protein 2	Creld2
0.32964	0.269812	0.568938	P62827;Q14AA6;Q61820	GTP-binding nuclear protein Ran;GTP-binding nuclear protein Ran, testis-specific isoform	Ran;1700009N14Rik;Rasl2-9
0.329557	0.314061	0.502986	Q60754	Macrophage receptor MARCO	Marco
0.329105	0.212897	0.67183	P09581	Macrophage colony-stimulating factor 1 receptor	Csf1r
0.327308	0.00340873	2.46741	D3YU17;Q8VCM8;F6S731	Nicalin	Ncln
0.326563	0.205288	0.687637	P16546-2;A3KGU5;P16546;E9Q447;A3KGU7;A3KGU9;A3KGU4;P08032	Spectrin alpha chain, non-erythrocytic 1	Sptan1
0.326494	0.21246	0.672722	Q8BS95	Golgi pH regulator	Gpr89a
0.326472	0.052178	1.28251	Q9D2G2;Q9D2G2-2	Dihydrolipoyllysine-residue succinyltransferase component of 2-oxoglutarate dehydrogenase complex, mitochondrial	Dlst
0.325604	0.101651	0.99289	P05977-2;E9PWG4;P05977;P09542	Myosin light chain 1/3, skeletal muscle isoform;Myosin light chain 3	Myl1;Myl3
0.325547	0.0456113	1.34093	Q9JL56;D3Z3E2	Glycerophosphodiester phosphodiesterase 1	Gde1
0.324903	0.00234284	2.63026	Q8BXQ2;B7ZC19	GPI transamidase component PIG-T	Pigt
0.323664	0.434104	0.362407	Q61033	Lamina-associated polypeptide 2, isoforms alpha/zeta	Tmpo
0.322653	0.0784954	1.10516	G3X972		Sec24c
0.321559	0.0482924	1.31612	Q9EP72	ER membrane protein complex subunit 7	Emc7
0.321268	0.032189	1.49229	A2A9I0;O35166	Golgi SNAP receptor complex member 2	Gosr2
0.321235	0.0362126	1.44114	Q99LC5	Electron transfer flavoprotein subunit alpha, mitochondrial	Etfa
0.319903	0.0888114	1.05153	Q922Q8	Leucine-rich repeat-containing protein 59	Lrrc59
0.319583	0.158693	0.799442	Q9R0Q8;H3BJQ5	C-type lectin domain family 4 member E	Clec4e
0.319523	0.0291516	1.53534	E9PX48;Q8R1A4-2;A2A9M5;Q8R1A4;A2A9M4;A2AW79;F6ZJ55	Dedicator of cytokinesis protein 7	Dock7
0.31952	0.485149	0.314124	E9Q9C5;P63082;D3Z3B2	V-type proton ATPase 16 kDa proteolipid subunit	Atp6v0c
0.319385	0.00926506	2.03315	Q9R0E2;F6WNR1;A8Y5E6	Procollagen-lysine,2-oxoglutarate 5-dioxygenase 1	Plod1
0.319223	0.174016	0.759412	O08539-2;Q6P1B9;O08539	Myc box-dependent-interacting protein 1	Bin1
0.319169	0.00449354	2.34741	Q9WUQ2;D3Z3S1;F6XLZ3	Prolactin regulatory element-binding protein	Preb
0.319141	0.00401984	2.39579	Q91YQ5	Dolichyl-diphosphooligosaccharide--protein glycosyltransferase subunit 1	Rpn1
0.319068	0.386427	0.412933	Q8CHG5;E9PZX5;E9PY98	Protein KIAA0317	Kiaa0317;1110018G07Rik
0.318208	0.0061034	2.21443	Q9CWZ7;D3Z4B2	Gamma-soluble NSF attachment protein	Napg
0.318152	0.0113611	1.94458	Q80TI0-4;Q80TI0-3;Q80TI0;D3YWR0;Q80TI0-2;F7BFL8	GRAM domain-containing protein 1B	Gramd1b
0.318106	0.0460248	1.33701	P58021;E9PZ69	Transmembrane 9 superfamily member 2	Tm9sf2
0.317636	0.106246	0.973686	Q9WV68	Peroxisomal 2,4-dienoyl-CoA reductase	Decr2
0.316494	0.0257471	1.58927	Q9EPK6	Nucleotide exchange factor SIL1	Sil1
0.315826	0.0679288	1.16795	Q8K4X7;E9Q6S5;E9Q2T9	1-acyl-sn-glycerol-3-phosphate acyltransferase delta	Agpat4
0.31552	0.247695	0.606083	Q9DCG2-2;Q9DCG2	CD302 antigen	Cd302
0.315198	0.0151304	1.82015	E9Q411		Nbas
0.315116	0.219077	0.659403	Q60770;Q60770-2;E9Q6R9;A2AEC9	Syntaxin-binding protein 3	Stxbp3
0.31493	0.0595458	1.22515	Q8K358;Q3TAA8	Phosphatidylinositol glycan anchor biosynthesis class U protein	Pigu
0.314519	0.0986942	1.00571	Q9CR51	V-type proton ATPase subunit G 1	Atp6v1g1
0.314467	0.440282	0.356269	Q3SXA6		Tnip3
0.313959	0.116355	0.934216	O09012-2;D3Z600;O09012	Peroxisomal targeting signal 1 receptor	Pex5
0.31258	0.140056	0.8537	Q8K1T1	Leucine-rich repeat-containing protein 25	Lrrc25
0.312373	0.00186939	2.7283	Q8K297	Procollagen galactosyltransferase 1	Colgalt1
0.311878	0.174525	0.758142	Q3U9N9	Monocarboxylate transporter 10	Slc16a10
0.311863	0.0122146	1.91312	Q3UJ81;D3Z6J3;Q3UJ81-3;Q3UJ81-2	Nuclear envelope phosphatase-regulatory subunit 1	Cnep1r1
0.311188	0.0126835	1.89676	Q9R0A0;D6RH82	Peroxisomal membrane protein PEX14	Pex14
0.311023	0.0154799	1.81023	B0R091;P61022;B0R092	Calcineurin B homologous protein 1	Chp1
0.310944	0.228058	0.641955	Q99J62;Q3UI84;D6RGM1	Replication factor C subunit 4	Rfc4
0.310587	0.109357	0.961153	Q8K094		Pvr
0.309096	0.155167	0.809202	Q9WUE3	Cytochrome b561 domain-containing protein 2	Cyb561d2
0.308256	0.218415	0.660718	Q4QRL3-2;Q4QRL3	Coiled-coil domain-containing protein 88B	Ccdc88b
0.308202	0.0587809	1.23076	P50427	Steryl-sulfatase	Sts
0.306851	0.0987438	1.00549	P30355	Arachidonate 5-lipoxygenase-activating protein	Alox5ap
0.306071	0.129762	0.886851	Q8R105;Q8R105-2	Vacuolar protein sorting-associated protein 37C	Vps37c
0.305884	0.235788	0.627477	Q9CR96;D3Z7S5;Q9CR96-2	Transmembrane protein 208	Tmem208
0.305827	0.370809	0.43085	Q04447;P07310	Creatine kinase B-type	Ckb
0.30494	0.290474	0.536893	Q9R117;E9QJS1	Non-receptor tyrosine-protein kinase TYK2;Tyrosine-protein kinase	Tyk2
0.304855	0.00975236	2.01089	P46978;D3YZN5;F6YHG5	Dolichyl-diphosphooligosaccharide--protein glycosyltransferase subunit STT3A	Stt3a
0.303971	0.485373	0.313924	Q6PFD9	Nuclear pore complex protein Nup98-Nup96;Nuclear pore complex protein Nup98;Nuclear pore complex protein Nup96	Nup98
0.302228	0.113636	0.944485	Q9ERR7;D3Z3Y8	15 kDa selenoprotein	42248
0.301914	0.26015	0.584777	P34022;H7BX22	Ran-specific GTPase-activating protein	Ranbp1
0.301628	0.10622	0.973795	P49710;E9Q4E5	Hematopoietic lineage cell-specific protein	Hcls1
0.301361	0.0589913	1.22921	P70315	Wiskott-Aldrich syndrome protein homolog	Was
0.301302	0.0577292	1.2386	Q9DCR2	AP-3 complex subunit sigma-1	Ap3s1
0.301173	0.0344905	1.4623	Q91V12-2;Q91V12-3;Q91V12-4;Q91V12;E9PYH2	Cytosolic acyl coenzyme A thioester hydrolase	Acot7
0.301131	0.109545	0.960408	P63168;Q80ZS7	Dynein light chain 1, cytoplasmic	Dynll1;BC048507
0.301094	0.134396	0.871615	B7FAU9;Q8BTM8;B7FAV1;F6XC15;J3JS91;Q8BTM8-2;F6Z2C0;F7AVL7	Filamin-A	Flna
0.298424	0.0156548	1.80535	Q9CQX8	28S ribosomal protein S36, mitochondrial	Mrps36
0.29831	0.0521189	1.283	Q9DB25;D6RCG2	Dolichyl-phosphate beta-glucosyltransferase	Alg5
0.295808	0.00482728	2.3163	F6RPJ9;Q9JHR7	Insulin-degrading enzyme	Ide
0.295781	0.546834	0.262145	F7BJB9		Morc3
0.295061	0.109484	0.960651	Q8BMF4	Dihydrolipoyllysine-residue acetyltransferase component of pyruvate dehydrogenase complex, mitochondrial	Dlat
0.294456	0.104621	0.98038	P42859;G3X9H5;P42859-2	Huntingtin	Htt
0.292916	0.187951	0.725956	Q04207-2;Q04207	Transcription factor p65	Rela
0.29268	0.0254269	1.59471	P62751;D3YWP3;D3Z1D6;D3YU45;D3YU46;D3YTY6;D3YW68	60S ribosomal protein L23a	Rpl23a;Rpl23a-ps3;Gm10335;Gm3940;Gm10923
0.292554	0.269111	0.570068	Q07113;F6SFP4	Cation-independent mannose-6-phosphate receptor	Igf2r
0.292367	0.136939	0.863472	P06800-3;P06800-2;P06800	Receptor-type tyrosine-protein phosphatase C	Ptprc
0.291401	0.0979632	1.00894	Q8CG29;P70248;G3V011;G3UZR3	Unconventional myosin-If	Myo1f
0.29128	0.165343	0.781614	H3BL13;G3XA18;Q9D7V9	N-acylethanolamine-hydrolyzing acid amidase;N-acylethanolamine-hydrolyzing acid amidase subunit alpha;N-acylethanolamine-hydrolyzing acid amidase subunit beta	Naaa
0.291234	0.316598	0.499492	P35294	Ras-related protein Rab-19	Rab19
0.290783	0.10497	0.978934	Q6Y685-2;Q6Y685;F8VQ95	Transforming acidic coiled-coil-containing protein 1	Tacc1
0.290736	0.125248	0.902229	Q9D0F6	Replication factor C subunit 5	Rfc5
0.290663	0.00257604	2.58905	Q9CZE3;Q8QZZ8	Ras-related protein Rab-32	Rab32
0.288726	0.00446784	2.3499	Q8C129	Leucyl-cystinyl aminopeptidase	Lnpep
0.287763	0.171307	0.766226	Q9CR50;G3UWD8	RING finger and CHY zinc finger domain-containing protein 1	Rchy1
0.285862	0.028772	1.54103	Q9ER41;F6VK94;D6REF0	Torsin-1B	Tor1b
0.285771	0.0422558	1.37411	B1AV66;Q8BR70	Protein YIPF6	Yipf6
0.28405	0.0509195	1.29312	P61222	ATP-binding cassette sub-family E member 1	Abce1
0.283339	0.178504	0.748353	P35456;P35456-2	Urokinase plasminogen activator surface receptor	Plaur
0.2833	0.145289	0.837768	Q8CI51;Q8CI51-2;Q9CRA2;Q8CI51-3;F8WJI6;E9Q8P5	PDZ and LIM domain protein 5	Pdlim5
0.282975	0.0225544	1.64677	Q91XD7	Cysteine-rich with EGF-like domain protein 1	Creld1
0.282832	0.136873	0.863682	P62774	Myotrophin	Mtpn
0.282805	0.00865912	2.06253	Q8VBT6	Apolipoprotein B receptor	Apobr
0.281962	0.338199	0.470828	Q9CXW3	Calcyclin-binding protein	Cacybp
0.281431	0.399897	0.398051	Q99L27;Q9DCZ1	GMP reductase 2;GMP reductase 1	Gmpr2;Gmpr
0.279808	0.0288984	1.53913	Q9WUD1	STIP1 homology and U box-containing protein 1	Stub1
0.279195	0.152969	0.815397	Q76MZ3;G3UWL2;H3BLQ0;Q7TNP2;Q3TTF6;H3BKU1;G3UWS4;H3BIV7;H3BLE7;G3UXQ1;H3BJ83	Serine/threonine-protein phosphatase 2A 65 kDa regulatory subunit A alpha isoform	Ppp2r1a
0.279116	0.0117034	1.93169	P36423;F6SG79;Q3TRY5	Thromboxane-A synthase	Tbxas1
0.279017	0.0184877	1.73312	Q9D1K2;F7B2B4	V-type proton ATPase subunit F	Atp6v1f
0.278398	0.560894	0.251119	P48678;P48678-2;P48678-3;D3YUF7	Prelamin-A/C;Lamin-A/C	Lmna
0.277188	0.614839	0.211239	P26350;J3QPK6	Prothymosin alpha;Thymosin alpha	Ptma;Gm6625
0.275325	0.0192019	1.71666	P97287;P97287-2	Induced myeloid leukemia cell differentiation protein Mcl-1 homolog	Mcl1
0.275228	0.367396	0.434865	P70460	Vasodilator-stimulated phosphoprotein	Vasp
0.273895	0.164755	0.783162	Q63844;D3Z6D8;D3Z3G6	Mitogen-activated protein kinase 3	Mapk3
0.272134	0.144937	0.838822	Q8BRQ9;Q925N0	Sideroflexin-5	Sfxn5
0.271087	0.132512	0.877744	B2RXS4	Plexin-B2	Plxnb2
0.271038	0.00198112	2.70309	Q62087;H3BL07;H3BKW4	Serum paraoxonase/lactonase 3	Pon3
0.271032	0.314508	0.502369	Q9D289	Trafficking protein particle complex subunit 6B	Trappc6b
0.271011	0.536471	0.270453	Q9CRB2	H/ACA ribonucleoprotein complex subunit 2	Nhp2
0.270971	0.574877	0.240425	Q61838;D3YW52	Alpha-2-macroglobulin;Alpha-2-macroglobulin 165 kDa subunit;Alpha-2-macroglobulin 35 kDa subunit	A2m;Pzp
0.270823	0.0469127	1.32871	Q8BH79-2;Q8BH79;Q8BH79-4;Q8BH79-3	Anoctamin-10	Ano10
0.26888	0.0998406	1.00069	Q6DVA0	LEM domain-containing protein 2	Lemd2
0.268339	0.160823	0.793651	P14131	40S ribosomal protein S16	Rps16
0.267959	0.307642	0.511954	Q91W52;Q91W52-2	Transmembrane protein 19	Tmem19
0.266295	0.0185739	1.7311	Q8BFZ9	Erlin-2	Erlin2
0.265701	0.0461403	1.33592	F8VQF9;Q3TLI0	Trafficking protein particle complex subunit 10	Trappc10
0.265237	0.723204	0.140739	Q9EST5;Q9EST5-2;E9Q148;F6UFG6;D3YYE1;D3Z7M9;O35381	Acidic leucine-rich nuclear phosphoprotein 32 family member B	Anp32b
0.265146	0.177348	0.751173	D3Z2R5		Sepn1
0.264937	0.50517	0.296563	Q9QXH4	Integrin alpha-X	Itgax
0.264667	0.0396005	1.4023	Q99J27	Acetyl-coenzyme A transporter 1	Slc33a1
0.264194	0.0722559	1.14113	Q9CQE7;Q9CQE7-2;F6UIS1;F6RK81	Endoplasmic reticulum-Golgi intermediate compartment protein 3	Ergic3
0.264023	0.283777	0.547023	Q3U4W8;P56399;D3YYA5;D3Z4K7	Ubiquitin carboxyl-terminal hydrolase;Ubiquitin carboxyl-terminal hydrolase 5	Usp5
0.263034	0.144113	0.841297	P56135;F8WHP8	ATP synthase subunit f, mitochondrial	Atp5j2
0.26282	0.216752	0.664037	Q8BHI7;D3Z0Z6;D3Z136	Elongation of very long chain fatty acids protein 5	Elovl5
0.262498	0.0906723	1.04253	P35564	Calnexin	Canx
0.261722	0.119798	0.921552	O70378;M0QWP2;M0QWY0;M0QWS0;M0QWI7;M0QWE2;M0QWC9	ER membrane protein complex subunit 8	Emc8
0.260188	0.0127266	1.89529	Q921R8;G3X937;Q921R8-2	Solute carrier family 41 member 3	Slc41a3
0.259438	0.267672	0.572397	Q5BL07-2;Q5BL07;F6RUH9	Peroxisome biogenesis factor 1	Pex1
0.259414	0.161077	0.792967	P62900	60S ribosomal protein L31	Rpl31
0.259368	0.231053	0.636289	Q9R1T4-2;Q9R1T4-3;Q9R1T4;A2A3W1	Septin-6	38961
0.259112	0.612659	0.212781	P08226;G3UWN5;G3UZM8;E9Q327	Apolipoprotein E	Apoe
0.258613	0.617755	0.209184	Q99M96-7;Q99M96-9;Q99M96-4;Q99M96-6;Q99M96-8;Q99M96-5;Q99M96-3;Q99M96-2;Q99M96;D3YUN2;D3YUM7	Suppressor of tumorigenicity 7 protein	St7
0.258488	0.0256882	1.59027	P12787	Cytochrome c oxidase subunit 5A, mitochondrial	Cox5a
0.258306	0.0658195	1.18165	Q91V55;D3YYM6;P97461	40S ribosomal protein S5;40S ribosomal protein S5, N-terminally processed	Rps5
0.25806	0.0751915	1.12383	Q9WTX5;E9PUV4	S-phase kinase-associated protein 1	Skp1
0.257855	0.496885	0.303744	P56393	Cytochrome c oxidase subunit 7B, mitochondrial	Cox7b
0.25762	0.0971083	1.01274	P21995	Embigin	Emb
0.257362	0.093192	1.03062	P17182;Q6PHC1;B0QZL1;B1ARR7;D3Z6E4;P17183;P21550;B1ARR6;D3YVD3;D3Z2S4;J3QPZ9;Q5SX61;Q5SX60;Q5SX59	Alpha-enolase;Enolase	Eno1
0.257326	0.317009	0.498928	O08992;Q3TMX0;H3BLG5;A2AKJ9;A2AKJ6;A2AKJ5	Syntenin-1	Sdcbp
0.256221	0.298776	0.524655	Q6ZWV7;G3UWD7	60S ribosomal protein L35	Rpl35;Gm10269
0.253891	0.0786163	1.10449	E9QM21;Q91WX5;O08734;F7CUQ1	Bcl-2 homologous antagonist/killer	Bak1
0.253664	0.0469187	1.32865	Q3UMC0;D3Z0U5;D6RGM7;Q9D3R6-3;D3Z4J2;Q9D3R6	Spermatogenesis-associated protein 5	Spata5
0.253182	0.0199237	1.70063	Q8BI84;Q8BI84-2;Q8BI84-3	Melanoma inhibitory activity protein 3	Mia3
0.252828	0.379737	0.420517	Q8R0G9	Nuclear pore complex protein Nup133	Nup133
0.252782	0.0695944	1.15743	Q80VA0-2;Q80VA0;Q80VA0-3	N-acetylgalactosaminyltransferase 7	Galnt7
0.252126	0.038213	1.41779	Q9DBS1	Transmembrane protein 43	Tmem43
0.251632	0.36103	0.442457	O89079;D3Z315;F6YFR7;E9Q6I5;F6XIG5	Coatomer subunit epsilon	Cope
0.2512	0.195823	0.708135	Q9CZX8;D3Z5R8;D3Z722;D3YUG3;D3YUT3	40S ribosomal protein S19	Rps19
0.250035	0.0767131	1.11513	Q9R0M6;A2AFP5;Q8BHH2	Ras-related protein Rab-9A	Rab9a;Rab9
0.248574	0.152046	0.818025	A2A547;P84099	60S ribosomal protein L19	Rpl19
0.248546	0.160084	0.795653	G3UYV7;P62858;J3QNN8	40S ribosomal protein S28	Rps28;Gm10263
0.248207	0.176102	0.754236	Q9EQ06;Q9EQ06-2;A8Y5N4;Q8VCR2-2;Q8VCR2	Estradiol 17-beta-dehydrogenase 11	Hsd17b11
0.247937	0.0395706	1.40263	Q8BWY7-3;Q8BWY7;Q8BWY7-2;B1ARC2;B1ARC5	Zinc transporter ZIP11	Slc39a11
0.247785	0.236031	0.627031	Q9D1C8	Vacuolar protein sorting-associated protein 28 homolog	Vps28
0.247307	0.198595	0.702032	Q7TNV0;E9Q8Y1;D3YVJ6	Protein DEK	Dek
0.24696	0.0103813	1.98375	P47740;B1AV77;B1ATI0	Fatty aldehyde dehydrogenase	Aldh3a2
0.245735	0.171572	0.765553	F8VQC9;Q8BTY2;Q8BTY2-2;Q8JZR6-2;Q5DTL9-2;Q8JZR6;B1AWV9;Q5DTL9	Sodium bicarbonate cotransporter 3	Slc4a7
0.245162	0.0278318	1.55546	O35083;G3UWV6	1-acyl-sn-glycerol-3-phosphate acyltransferase alpha	Agpat1
0.243645	0.0649693	1.18729	Q9D8V0;Q9D8V0-3;Q6PGJ8;Q9D8V0-2	Minor histocompatibility antigen H13	Hm13
0.243546	0.312851	0.504662	Q924Z4;D3YTM0;D3Z0Z2;D3Z4M2	Ceramide synthase 2	Cers2
0.243356	0.522088	0.282256	Q9CZ69	CKLF-like MARVEL transmembrane domain-containing protein 6	Cmtm6
0.24287	0.0678939	1.16817	P35283;A2CG35	Ras-related protein Rab-12	Rab12
0.242636	0.657864	0.181864	Q91YP3	Putative deoxyribose-phosphate aldolase	Dera
0.242553	0.0281367	1.55073	Q9D024;Q9D024-2;F7C265;Q9D024-3;B1AR93	Coiled-coil domain-containing protein 47	Ccdc47
0.242383	0.133691	0.873899	P51150	Ras-related protein Rab-7a	Rab7a
0.241405	0.722746	0.141014	Q80UI7		Clec4a1
0.241203	0.302529	0.519233	Q8BMG7;E9QKE4;Q8BMG7-2	Rab3 GTPase-activating protein non-catalytic subunit	Rab3gap2
0.240365	0.33513	0.474786	Q62261	Spectrin beta chain, non-erythrocytic 1	Sptbn1
0.240006	0.350573	0.455221	Q6PAM1;Q6PAM1-2;A8Y5J8;A2ADZ3;A2ADZ4;A2ADZ2	Alpha-taxilin	Txlna
0.239932	0.0456746	1.34033	Q8BH59	Calcium-binding mitochondrial carrier protein Aralar1	Slc25a12
0.239441	0.356699	0.447698	P97492	Regulator of G-protein signaling 14	Rgs14
0.238922	0.170276	0.768847	O08807;B1AZS9	Peroxiredoxin-4	Prdx4
0.23859	0.124678	0.904209	Q9DBL7	Bifunctional coenzyme A synthase;Phosphopantetheine adenylyltransferase;Dephospho-CoA kinase	Coasy
0.238042	0.0711096	1.14807	P24270;A2AL20	Catalase	Cat
0.237559	0.0840471	1.07548	Q91X21;Q91X21-2	Uncharacterized protein KIAA2013	Kiaa2013
0.237034	0.212009	0.673647	Q91VK4	Integral membrane protein 2C;CT-BRI3	Itm2c
0.236772	0.203884	0.690618	Q80UJ7	Rab3 GTPase-activating protein catalytic subunit	Rab3gap1
0.235272	0.304826	0.515947	Q64435;K9J7B2	UDP-glucuronosyltransferase 1-6	Ugt1a6;Ugt1a6b
0.235253	0.17073	0.767689	O08583;O08583-2;G3X9I4	THO complex subunit 4	Alyref;Alyref2
0.234138	0.143239	0.843938	P99027	60S acidic ribosomal protein P2	Rplp2
0.233822	0.00675397	2.17044	P63017;Q504P4;D3Z5E2;D3YW43	Heat shock cognate 71 kDa protein	Hspa8
0.233456	0.00294866	2.53038	Q99J47-2;Q99J47	Dehydrogenase/reductase SDR family member 7B	Dhrs7b
0.233085	0.396398	0.401869	O09172;H3BJA3;F6VNW5	Glutamate--cysteine ligase regulatory subunit	Gclm
0.232803	0.592945	0.226985	P08074;F6YNX9;A2AC16;Q91X52	Carbonyl reductase [NADPH] 2	Cbr2
0.232401	0.117137	0.931306	Q9ERY9;D3YUR8	Probable ergosterol biosynthetic protein 28	ORF11;0610007P14Rik
0.232145	0.0403412	1.39425	Q9R1P4	Proteasome subunit alpha type-1	Psma1
0.232111	0.0146605	1.83385	Q8K0C8	Cytochrome c oxidase assembly protein COX19	Cox19
0.231456	0.349502	0.456551	Q8BXV2	BRI3-binding protein	Bri3bp
0.230927	0.415629	0.381294	Q8BJT9		Edem2
0.230495	0.648009	0.188419	P26952-2;P26952;P26952-3	Interleukin-3 receptor subunit alpha	Il3ra
0.230457	0.0290734	1.5365	D3Z2J6;Q9D710;D3YYX0	Thioredoxin-related transmembrane protein 2	Tmx2
0.22997	0.361544	0.441839	P63158;D3YZ18;D3YVC6	High mobility group protein B1	Hmgb1
0.229446	0.266089	0.574973	Q91W00;Q8C2H7;P23336;Q9DBU1;P23336-2;P23336-3;B2FDI6	N-acetyllactosaminide alpha-1,3-galactosyltransferase	Ggta1
0.228738	0.0126137	1.89916	Q8C0K5;D3YVC9;Q8C0K5-2	Graves disease carrier protein homolog	Slc25a16
0.228565	0.274247	0.561858	Q8K1A5;D6RIR0;D6RFP3;D6RDC1;Q8K1A5-3;Q8K1A5-2	Transmembrane protein 41B	Tmem41b
0.228436	0.241498	0.617086	Q9CQS8;E9PW43	Protein transport protein Sec61 subunit beta	Sec61b;Gm10320
0.228195	0.0149773	1.82457	Q61233;D3YZ25;D3YVW8;D3Z7D9;D3Z311	Plastin-2	Lcp1
0.227063	0.11275	0.947884	Q8BM55;D3Z6S1;Q8BM55-3;Q8BM55-2	Transmembrane protein 214	Tmem214
0.226769	0.00315303	2.50127	Q9JL25-2;Q9JL25	Regulator of G-protein signaling 1	Rgs1
0.226295	0.497065	0.303587	P62869	Transcription elongation factor B polypeptide 2	Tceb2
0.22608	0.0844332	1.07349	Q9DCB8	Iron-sulfur cluster assembly 2 homolog, mitochondrial	Isca2
0.225944	0.340578	0.467784	P63242;J3QPS8;Q8BGY2	Eukaryotic translation initiation factor 5A-1	Eif5a
0.225302	0.409238	0.388024	Q61990-2;Q61990-3;Q61990;E9Q7D8;P57722-2;P57722;P57724	Poly(rC)-binding protein 2;Poly(rC)-binding protein 3	Pcbp2;Pcbp3
0.224391	0.151683	0.819064	Q9DAY5	UPF0669 protein C6orf120 homolog
0.223742	0.256706	0.590564	Q8VHI3	GDP-fucose protein O-fucosyltransferase 2	Pofut2
0.223603	0.228426	0.641255	Q9DB34	Charged multivesicular body protein 2a	Chmp2a
0.223399	0.473586	0.324601	Q99JW4;E9QP62;Q9D7B2;Q91XD2	LIM and senescent cell antigen-like-containing domain protein 1;LIM and senescent cell antigen-like-containing domain protein 2	Lims1;Lims2
0.223296	0.455257	0.341743	Q9WUK4	Replication factor C subunit 2	Rfc2
0.222377	0.22318	0.651345	P60229	Eukaryotic translation initiation factor 3 subunit E	Eif3e
0.221838	0.0538092	1.26914	P61620;A2ATT9	Protein transport protein Sec61 subunit alpha isoform 1	Sec61a1
0.221697	0.332512	0.478193	Q8CAK1;B2FDE8	Putative transferase CAF17 homolog, mitochondrial	Iba57
0.219726	0.089087	1.05019	P27046;F6QMB7	Alpha-mannosidase 2	Man2a1
0.219538	0.382151	0.417764	P22437	Prostaglandin G/H synthase 1	Ptgs1
0.219493	0.472483	0.325614	Q9WUU8-2;Q9WUU8-3;D3Z2W0;Q9WUU8;E9QM75;D3Z3B6	TNFAIP3-interacting protein 1	Tnip1
0.218424	0.267593	0.572525	Q9CR20;D6RI20;J3QMQ2	Immediate early response 3-interacting protein 1	Ier3ip1;Hdhd2;Gm10784
0.218404	0.152369	0.817104	O88844;D3YVY3	Isocitrate dehydrogenase [NADP] cytoplasmic	Idh1
0.218286	0.117469	0.930076	E9Q3Q6;Q61490;E9Q4G8;F6QH25;Q5MPX5	CD166 antigen	Alcam
0.21813	0.120718	0.918226	Q9CX30-2;Q9CX30;D3YY42;D3Z5F9	Protein YIF1B	Yif1b
0.217829	0.282294	0.549298	Q9WU78;Q9WU78-3;Q9WU78-2	Programmed cell death 6-interacting protein	Pdcd6ip
0.216662	0.416156	0.380744	Q8K2Q7;J3KMJ4;Q8K2Q7-2	BRO1 domain-containing protein BROX	Brox
0.215933	0.346236	0.460628	Q9R0M8;A2AER4;A2AER3	UDP-galactose translocator	Slc35a2
0.215759	0.377365	0.423238	Q9D4V7;Q9D4V7-2	Rab-like protein 3	Rabl3
0.215089	0.43408	0.362431	Q8CIE6;F8WHL2;F6XJN3	Coatomer subunit alpha;Xenin;Proxenin	Copa
0.21499	0.21119	0.675328	Q9CQX2	Cytochrome b5 type B	Cyb5b
0.214706	0.0515238	1.28799	O55022	Membrane-associated progesterone receptor component 1	Pgrmc1
0.214463	0.121126	0.916761	Q99MR3;D3Z362	Solute carrier family 12 member 9	Slc12a9
0.213911	0.17296	0.762055	Q6S5C2;Q6S5C2-2	N-acetylglucosamine-1-phosphotransferase subunit gamma	Gnptg
0.213673	0.19715	0.705202	P98192;Q05DV2	Dihydroxyacetone phosphate acyltransferase	Gnpat
0.213391	0.123566	0.908101	P83093;I1E4X8;F6WBP9	Stromal interaction molecule 2	Stim2
0.213116	0.23844	0.622621	Q3UUQ7	GPI inositol-deacylase	Pgap1
0.212552	0.0933125	1.03006	P61804	Dolichyl-diphosphooligosaccharide--protein glycosyltransferase subunit DAD1	Dad1
0.212432	0.331729	0.479217	A2AWF8;Q64455;A2AWF9;E9Q4S7	Receptor-type tyrosine-protein phosphatase eta	Ptprj
0.212344	0.543734	0.264613	Q9CR60	Vesicle transport protein GOT1B	Golt1b
0.211849	0.0210971	1.67578	Q9DBH5	Vesicular integral-membrane protein VIP36	Lman2
0.211064	0.327023	0.485422	E9PUF7;Q61210-5;Q61210-2;Q61210;Q61210-4;Q61210-3;F6ZN61	Rho guanine nucleotide exchange factor 1	Arhgef1
0.211004	0.00533622	2.27277	Q6ZQM8;Q62452;E9PXN7;D3Z748;D3YZ96;D6RH94	UDP-glucuronosyltransferase 1-7C	Ugt1a7c
0.210786	0.37887	0.42151	Q9JIG8	PRA1 family protein 2	Praf2
0.210471	0.24425	0.612165	Q80TH2-1;Q80TH2;B7ZNX6;Q80TH2-2	Protein LAP2	Erbb2ip
0.210121	0.169955	0.769667	Q9Z2M6	Ubiquitin-like protein 3	Ubl3
0.209461	0.130964	0.882849	Q8R0X7;D6REF7;D3YZT4;D3YY13;D3Z1Z3	Sphingosine-1-phosphate lyase 1	Sgpl1
0.209124	0.0652573	1.18537	Q9JK42	[Pyruvate dehydrogenase [lipoamide]] kinase isozyme 2, mitochondrial	Pdk2
0.208574	0.255568	0.592494	G3X9V2;P30999;E9Q8Z6;E9Q8Z8;E9Q986;D3Z7H6;E9Q907;E9Q905;E9Q8Z4;E9Q8Z9;D3Z2H2;E9Q901;P30999-2;E9Q904;P30999-3;E9Q8Z5;E9Q906;E9Q903;D3Z2H7	Catenin delta-1	Ctnnd1
0.208236	0.175066	0.756799	Q3TML0;Q922R8	Protein disulfide-isomerase A6	Pdia6
0.208203	0.299483	0.523628	Q9CY73;Q9CY73-2	39S ribosomal protein L44, mitochondrial	Mrpl44
0.206546	0.220822	0.655957	Q3UMB5;Q3UMB5-2	Smith-Magenis syndrome chromosomal region candidate gene 8 protein homolog	Smcr8
0.203619	0.568777	0.245058	P11499;E9Q3D6;E9PX27;E9Q0C3;D3Z1R1;REV__Q8BL66	Heat shock protein HSP 90-beta	Hsp90ab1
0.203465	0.276116	0.558909	Q9CZD5;D3YWL2;D3Z0H9	Translation initiation factor IF-3, mitochondrial	Mtif3
0.203261	0.749279	0.125356	Q9CRC8;F6RGS7;F6RDA7;D6RHB1	Leucine-rich repeat-containing protein 40	Lrrc40
0.202913	0.0620644	1.20716	E9Q035;P47758;Q921I1;F7BAE9	Signal recognition particle receptor subunit beta	Gm20425;Srprb
0.202848	0.357502	0.446722	P40142	Transketolase	Tkt
0.202648	0.00784624	2.10534	Q99KI3	ER membrane protein complex subunit 3	Emc3
0.202488	0.170877	0.767316	Q9JIW9;F6QC68	Ras-related protein Ral-B	Ralb
0.201888	0.094402	1.02502	Q61542	StAR-related lipid transfer protein 3	Stard3
0.201161	0.0427267	1.3693	Q8BXZ1	Protein disulfide-isomerase TMX3	Tmx3
0.201098	0.170019	0.769503	P47757-2;A2AMW0;A2AMV7;P47757;F7CAZ6;F6QJN8;F6YHZ8	F-actin-capping protein subunit beta	Capzb
0.20102	0.124017	0.90652	B1AW21;Q9Z2C5;Q3UDN6	Myotubularin	Mtm1
0.200702	0.0910804	1.04057	Q8VDV3;Q8VDV3-2;D3Z585;D3YZN2;D3YXL8;D3YZ86	Guanine nucleotide exchange factor for Rab-3A	Rab3il1
0.20048	0.191517	0.717794	Q8VE11	Myotubularin-related protein 6	Mtmr6
0.200193	0.191804	0.717142	Q9D8V7;D6RFV4;D3Z5H3	Signal peptidase complex catalytic subunit SEC11C	Sec11c
0.199342	0.366108	0.436391	Q3TQB2;Q3TQB2-2;F6UAF9;D6RG85;D3Z5V7	FAD-dependent oxidoreductase domain-containing protein 1	Foxred1
0.198619	0.549698	0.259876	P15702	Leukosialin	Spn
0.197964	0.477788	0.320765	Q99P31	Hsp70-binding protein 1	Hspbp1
0.197353	0.336701	0.472755	F6YX19;Q99LV7;F7DFD7;Q99LV7-2;F6RUP6	Phosphatidylinositol-glycan biosynthesis class X protein	Pigx
0.197342	0.126783	0.896939	O89109	Intermediate conductance calcium-activated potassium channel protein 4	Kcnn4
0.196244	0.385315	0.414184	Q60805;P55144-3;P55144;P55144-2	Tyrosine-protein kinase Mer	Mertk
0.195932	0.507001	0.294991	Q5F285	Transmembrane protein 256	Tmem256
0.195663	0.167929	0.774875	Q3UN02;B0V2Q9	Lysocardiolipin acyltransferase 1	Lclat1
0.19557	0.149103	0.826515	E9PVA8;Q8BIX2		Gcn1l1
0.195501	0.189882	0.721516	Q8CFJ7;D3Z5G2;Q8CFJ7-2;D3Z2H6;F6ZZX2	Solute carrier family 25 member 45	Slc25a45
0.194692	0.709915	0.148794	E9PYI8;Q9JMA1	Ubiquitin carboxyl-terminal hydrolase;Ubiquitin carboxyl-terminal hydrolase 14	Usp14
0.194659	0.175534	0.755639	G3XA21;E0CZ22;D3Z624;F6UUF6;E9PYI5		Mroh1
0.194517	0.0378935	1.42144	Q60930;G3UX26	Voltage-dependent anion-selective channel protein 2	Vdac2
0.193823	0.0509875	1.29254	Q9D517	1-acyl-sn-glycerol-3-phosphate acyltransferase gamma	Agpat3
0.193631	0.575261	0.240135	O35454;A2A7F6;E9Q741	Chloride transport protein 6	Clcn6
0.19279	0.110543	0.956469	Q9Z0P5;Q9Z0P5-2	Twinfilin-2	Twf2
0.192786	0.342764	0.465005	O35972	39S ribosomal protein L23, mitochondrial	Mrpl23
0.192479	0.421316	0.375393	P29351;P29351-2;P29351-3;G3UYY5;G3UZU6;G3UXM2	Tyrosine-protein phosphatase non-receptor type 6	Ptpn6
0.192073	0.0304356	1.51662	Q9D1I2	Bcl10-interacting CARD protein
0.191889	0.154013	0.812441	Q80UU9	Membrane-associated progesterone receptor component 2	Pgrmc2
0.191539	0.182324	0.739157	G3X9F1;Q9R1S3-2;Q9R1S3-3;Q9R1S3;Q9R1S3-4	GPI ethanolamine phosphate transferase 1	Pign
0.191119	0.0580731	1.23603	Q9D0F3;D3Z5B9	Protein ERGIC-53	Lman1
0.191018	0.326906	0.485577	Q8R3I9	UDP-GlcNAc:betaGal beta-1,3-N-acetylglucosaminyltransferase 8	B3gnt8
0.190704	0.221814	0.65401	D3Z6B9;Q8K009	Mitochondrial 10-formyltetrahydrofolate dehydrogenase	Aldh1l2
0.189858	0.358098	0.445998	Q9QYI4;Q8C4C9;D6RHR9	DnaJ homolog subfamily B member 12	Dnajb12
0.189691	0.343531	0.464034	E9PWY9;Q8C0C7;D6RIJ2	Phenylalanine--tRNA ligase alpha subunit	Farsa
0.189027	0.419154	0.377626	P60605;G3UZX2	Ubiquitin-conjugating enzyme E2 G2	Ube2g2
0.188529	0.120997	0.917224	Q9Z110-2;Q9Z110;D3Z0B4;H3BKJ8;H3BLE8;H3BKK0	Delta-1-pyrroline-5-carboxylate synthase;Glutamate 5-kinase;Gamma-glutamyl phosphate reductase	Aldh18a1
0.187465	0.0805869	1.09374	Q9CRD0;Q9CRD0-2;Q9CRD0-3	OCIA domain-containing protein 1	Ociad1
0.187114	0.420083	0.376664	Q8BXN9;Q8BXN9-2;A2AQJ5;A2AQJ6;A2AQJ7;Q8BXN9-3	Transmembrane protein 87A	Tmem87a
0.185882	0.173797	0.759957	Q8BXA5	Cleft lip and palate transmembrane protein 1-like protein	Clptm1l
0.185776	0.713048	0.146881	Q99M01;G3X9Q4	Phenylalanine--tRNA ligase, mitochondrial	Fars2
0.185651	0.201598	0.695514	Q99KW9	T-cell immunomodulatory protein	Itfg1
0.185461	0.637408	0.195583	Q922K7;E9QN31	Putative ribosomal RNA methyltransferase NOP2	Nop2
0.185429	0.417982	0.378842	Q922B1	O-acetyl-ADP-ribose deacetylase MACROD1	Macrod1
0.185406	0.311364	0.506732	D3Z1F3;Q8BGG6	Motile sperm domain-containing protein 3	Mospd3
0.185188	0.0918106	1.03711	Q9D1D4;Q9D1D4-2	Transmembrane emp24 domain-containing protein 10	Tmed10
0.185015	0.445296	0.351351	E9Q467;E9Q236		Abcc4
0.185002	0.0543618	1.26471	Q99MN1;Q8R2P8	Lysine--tRNA ligase	Kars
0.184724	0.0843747	1.07379	Q60759;D3Z4I2	Glutaryl-CoA dehydrogenase, mitochondrial	Gcdh
0.18454	0.172451	0.763335	Q9DB15	39S ribosomal protein L12, mitochondrial	Mrpl12
0.184001	0.292629	0.533683	Q6F5F2		Sirpb1a
0.18377	0.514705	0.288442	O54988-2;O54988	STE20-like serine/threonine-protein kinase	Slk
0.183294	0.254707	0.593959	A2AHX9;Q64373-2;Q9QWX2;Q64373-3;Q64373-4;Q64373;A2AHX8;A2AHX7	Bcl-2-like protein 1	Bcl2l1
0.183234	0.424653	0.371965	Q9CZR8;Q9CX33;D3Z4M7	Elongation factor Ts, mitochondrial	Tsfm
0.182901	0.209134	0.679574	Q9DAM5;A2A9V7;A2A9V4;A2A9V5	Mitochondrial thiamine pyrophosphate carrier	Slc25a19
0.181154	0.256847	0.590326	Q921E2;Q3TXV4;D6RFT6	Ras-related protein Rab-31	Rab31
0.181146	0.179635	0.745609	Q6DID7;Q6DID7-2	Protein wntless homolog	Wls
0.179996	0.179362	0.74627	P70227	Inositol 1,4,5-trisphosphate receptor type 3	Itpr3
0.178836	0.180698	0.743048	Q9WUR2-2;Q3TCD4;Q9WUR2;E9PYC6;E9Q858;E9PUY9;E9PYA9;E9PVM6;E9Q7A8;E9PY42;Q78JN3	Enoyl-CoA delta isomerase 2, mitochondrial	Eci2
0.17875	0.397009	0.401199	Q61263	Sterol O-acyltransferase 1	Soat1
0.178687	0.259352	0.58611	Q9JKR6;F6TRP3;E0CYZ2	Hypoxia up-regulated protein 1	Hyou1
0.178284	0.449845	0.346937	A2AE89;P10649;F6WHQ7;F6Y363;D3YZ29;D3YVP6;D3YX76;A2AE91;E9QAC8;D3YVP5;Q8R5I6;Q80W21;P15626;E9PV63;J3QQ61;E9PVM7;O35660;P48774	Glutathione S-transferase Mu 1	Gstm1
0.177363	0.259401	0.586028	P22892;Q8CBB7	AP-1 complex subunit gamma-1	Ap1g1
0.177112	0.0672287	1.17245	P62492;G3UY29;E9Q3P9;F8WGS1;E9Q6B3	Ras-related protein Rab-11A	Rab11a;Rab11b
0.176944	0.229619	0.638992	Q8C3X8	Lipase maturation factor 2	Lmf2
0.176103	0.153698	0.813331	Q8VBT0;F6V084	Thioredoxin-related transmembrane protein 1	Tmx1
0.175685	0.714921	0.145742	P68373	Tubulin alpha-1C chain	Tuba1c
0.175477	0.105192	0.978017	Q91YW3	DnaJ homolog subfamily C member 3	Dnajc3
0.175217	0.418602	0.378199	Q9CQ54	NADH dehydrogenase [ubiquinone] 1 subunit C2	Ndufc2
0.174529	0.605181	0.218115	Q9JKB3-2;Q9JKB3	Y-box-binding protein 3	Ybx3
0.174442	0.141362	0.849666	Q80X80	C2 domain-containing protein 2-like	C2cd2l
0.174287	0.298411	0.525185	Q9R0Q9;Q8R0J2;E9PVP3;Q5F2B1;F6XX36;F6ZGG4	Mannose-P-dolichol utilization defect 1 protein	Mpdu1
0.172767	0.320594	0.494044	Q8BGF6	ELMO domain-containing protein 2	Elmod2
0.17201	0.178608	0.748098	Q8K0D5;E0CXN8	Elongation factor G, mitochondrial	Gfm1
0.171758	0.112473	0.948952	P11152	Lipoprotein lipase	Lpl
0.171437	0.354891	0.449905	Q9CQ71	Replication protein A 14 kDa subunit	Rpa3
0.17094	0.314202	0.50279	Q8VD00	Transmembrane protein 97	Tmem97
0.170727	0.152383	0.817064	Q69ZN6-2;Q69ZN6;D3YXC6;D3Z1C3	N-acetylglucosamine-1-phosphotransferase subunits alpha/beta;N-acetylglucosamine-1-phosphotransferase subunit alpha;N-acetylglucosamine-1-phosphotransferase subunit beta	Gnptab
0.170296	0.403815	0.393817	Q91V01;D6RGA3	Lysophospholipid acyltransferase 5	Lpcat3
0.169741	0.107954	0.966762	Q99N93	39S ribosomal protein L16, mitochondrial	Mrpl16
0.169274	0.0874788	1.0581	A2AJ88-2;A2AJ88;F6UDU9;B0R010;B0R009;B0R011	Patatin-like phospholipase domain-containing protein 7	Pnpla7
0.168455	0.333895	0.476391	Q91VX9	Transmembrane protein 168	Tmem168
0.168342	0.181116	0.742044	Q99KU0;Q5SXR2	Vacuole membrane protein 1	Vmp1
0.168005	0.216122	0.6653	P09055	Integrin beta-1	Itgb1
0.16799	0.440698	0.355859	Q5SSJ1		Wfdc17
0.167308	0.0336527	1.47298	Q9Z2U0;Q9CWH6	Proteasome subunit alpha type-7;Proteasome subunit alpha type-7-like	Psma7;Psma8
0.166919	0.19861	0.701998	D3Z7P3-2;F6RDM4
0.165984	0.150702	0.821881	P97742	Carnitine O-palmitoyltransferase 1, liver isoform	Cpt1a
0.165984	0.106124	0.974186	Q61549	EGF-like module-containing mucin-like hormone receptor-like 1	Emr1
0.164759	0.177305	0.751279	O55242;O55242-2	Sigma non-opioid intracellular receptor 1	Sigmar1
0.1643	0.0421222	1.37549	Q9DBG7;F6VF36	Signal recognition particle receptor subunit alpha	Srpr
0.163926	0.12148	0.915494	Q8VEL0;Q8VEL0-2	Motile sperm domain-containing protein 1	Mospd1
0.163666	0.388074	0.411085	Q7TT50;Q80UW5	Serine/threonine-protein kinase MRCK beta	Cdc42bpb
0.162528	0.345558	0.461479	P52503;D3YW32	NADH dehydrogenase [ubiquinone] iron-sulfur protein 6, mitochondrial	Ndufs6
0.162312	0.137508	0.861671	O55143;O55143-2;J3KMM5	Sarcoplasmic/endoplasmic reticulum calcium ATPase 2	Atp2a2
0.161443	0.456437	0.340619	Q9ES52-3;Q9ES52-2;Q9ES52;Q9ES52-6;Q9ES52-5;Q9ES52-4	Phosphatidylinositol 3,4,5-trisphosphate 5-phosphatase 1	Inpp5d
0.161049	0.382367	0.417519	P56391	Cytochrome c oxidase subunit 6B1	Cox6b1
0.160651	0.280079	0.552719	Q9DB20;F7D3P8;F6XVM5	ATP synthase subunit O, mitochondrial	Atp5o
0.160268	0.562185	0.250121	Q9DD03;D3YUS4	Ras-related protein Rab-13	Rab13
0.160238	0.34421	0.463176	Q8BHC7	Rhomboid-related protein 4	Rhbdd1
0.159713	0.222268	0.653123	P40630-2;P40630;D3Z0F3	Transcription factor A, mitochondrial	Tfam
0.159684	0.366508	0.435917	P63094;Q6R0H7;P63094-3;P63094-2;Q6R0H7-4;Q8CGK7;Q66L47;A2A610	Guanine nucleotide-binding protein G(s) subunit alpha isoforms short;Guanine nucleotide-binding protein G(s) subunit alpha isoforms XLas	Gnas
0.159605	0.0499309	1.30163	Q9CYN2	Signal peptidase complex subunit 2	Spcs2
0.159179	0.493982	0.306289	I7HPY1;Q9D8T0;I7HJS7;I7HLV5;J3JS95;P97805	Protein FAM3A	Fam3a
0.158401	0.213064	0.67149	Q9D1G1	Ras-related protein Rab-1B	Rab1b
0.158085	0.213476	0.670652	Q8C7H1	Methylmalonic aciduria type A homolog, mitochondrial	Mmaa
0.157809	0.163188	0.787313	P06745;F6SAC3;CON__Q3ZBD7	Glucose-6-phosphate isomerase	Gpi;Gm1840
0.157301	0.631363	0.199721	Q9QYF9;Q8VCV2;Q8CBD0	Protein NDRG3	Ndrg3
0.156492	0.451262	0.345572	Q8BR63	Protein FAM177A1	Fam177a1
0.155094	0.516655	0.286799	O70475;D3Z3F7;D3YXP9	UDP-glucose 6-dehydrogenase	Ugdh
0.154796	0.676798	0.169541	Q6NV83-2;Q6NV83;Q6NV83-3	U2 snRNP-associated SURP motif-containing protein	U2surp
0.154639	0.52163	0.282638	A2AWP6;A2AWP8-3;A2AWP8-2;A2AWP8-4;A2AWP8;A2AWP8-5;F6S3V7;F6ZH54;A2AWP4	Rho guanine nucleotide exchange factor 10-like protein	Arhgef10l
0.154169	0.391103	0.407709	D3Z456;Q99N95;F6W7C7	39S ribosomal protein L3, mitochondrial	Mrpl3
0.15395	0.146908	0.832954	Q9CRD2	ER membrane protein complex subunit 2	Emc2
0.153934	0.0399064	1.39896	Q8BRH0;G5E8C4;Q8BRH0-2;D3Z2Z3	Transmembrane and TPR repeat-containing protein 3	Tmtc3
0.153128	0.264447	0.577661	Q9WTK3;E9PW03;E9QA52;F6T7Y8;E9Q4I5	Glycosylphosphatidylinositol anchor attachment 1 protein	Gpaa1
0.153085	0.574081	0.241026	P54751	CMP-N-acetylneuraminate-beta-galactosamide-alpha-2,3-sialyltransferase 1	St3gal1
0.152776	0.414032	0.382966	O88455;D3Z7G1;D3YXR4	7-dehydrocholesterol reductase	Dhcr7
0.152748	0.336096	0.473537	Q6ZQ08-2;Q6ZQ08;Q6ZQ08-4;B7ZWL1;Q6ZQ08-3	CCR4-NOT transcription complex subunit 1	Cnot1
0.152387	0.599901	0.22192	Q8K3W0;D3Z7P0;E9Q0U3;E9Q8Q1;Q8K3W0-4;Q8K3W0-6;Q8K3W0-5;Q8K3W0-1	BRCA1-A complex subunit BRE	Bre
0.152129	0.199009	0.701128	O08795-2;O08795	Glucosidase 2 subunit beta	Prkcsh
0.151807	0.0862463	1.06426	P35486	Pyruvate dehydrogenase E1 component subunit alpha, somatic form, mitochondrial	Pdha1
0.151446	0.88224	0.0544134	Q9MD59;P03893	NADH-ubiquinone oxidoreductase chain 2	mt-Nd2;Mtnd2
0.150778	0.326439	0.486198	P09925;A2ALA6	Surfeit locus protein 1	Surf1
0.150578	0.557127	0.254046	P14234	Tyrosine-protein kinase Fgr	Fgr
0.150433	0.263749	0.578809	O54692	Centromere/kinetochore protein zw10 homolog	Zw10
0.149551	0.30294	0.518644	Q3ZK22;D3Z4E6;Q3ZK22-3;Q3ZK22-4;F6TIK3;D3YVB1;F7CPT8;Q3ZK22-2	Vezatin	Vezt
0.148822	0.546812	0.262162	Q80WQ6	Inactive rhomboid protein 2	Rhbdf2
0.148082	0.693981	0.158652	B9EJ54;E9Q880		Nup205
0.147631	0.572934	0.241896	P17095	High mobility group protein HMG-I/HMG-Y	Hmga1
0.147469	0.250729	0.600795	Q3U1J4	DNA damage-binding protein 1	Ddb1
0.147459	0.372142	0.429291	Q8VDN2;Q91WH7;Q64436;E9QNX7	Sodium/potassium-transporting ATPase subunit alpha-1	Atp1a1
0.147298	0.249475	0.602973	Q8CFX1;A2A7A7;A2A7A8	GDH/6PGL endoplasmic bifunctional protein;Glucose 1-dehydrogenase;6-phosphogluconolactonase	H6pd
0.146575	0.220224	0.657135	P62821	Ras-related protein Rab-1A	Rab1A
0.146544	0.448146	0.348581	Q91Z50;P39749	Flap endonuclease 1	Fen1
0.145678	0.207826	0.682301	O54918;O54918-2;O54918-3;Q6PEB3	Bcl-2-like protein 11	Bcl2l11
0.145047	0.645827	0.189884	Q5SUF2;Q5SUF2-3;Q5SUF2-2	Luc7-like protein 3	Luc7l3
0.144529	0.222456	0.652757	P38647	Stress-70 protein, mitochondrial	Hspa9
0.14431	0.2223	0.65306	Q9D6I7;D3YW04	Protein FAM69A	Fam69a
0.143633	0.665541	0.176825	Q3U0V2	Tumor necrosis factor receptor type 1-associated DEATH domain protein	Tradd
0.143441	0.219588	0.658392	Q68FL0;G5E8Y0;G3X9J1;P70414	Sodium/calcium exchanger 1	Slc8a1
0.143095	0.250707	0.600834	P62814;Q91YH6	V-type proton ATPase subunit B, brain isoform	Atp6v1b2
0.14261	0.302194	0.519714	Q99N15;A2AFQ2;O08756	3-hydroxyacyl-CoA dehydrogenase type-2	Hsd17b10
0.142599	0.42759	0.368972	Q3TC72	Fumarylacetoacetate hydrolase domain-containing protein 2A	Fahd2
0.141587	0.259205	0.586357	G5E895;D3Z494		Akr1b10
0.141044	0.59065	0.22867	P63325;Q3UW83;J3QNI7	40S ribosomal protein S10	Rps10;Rps10-ps1
0.140932	0.225917	0.646052	O88856;Q3TQN1	Protein-tyrosine sulfotransferase 2	Tpst2
0.139975	0.300547	0.522087	Q9JKL4	NADH dehydrogenase [ubiquinone] 1 alpha subcomplex assembly factor 3	Ndufaf3
0.138832	0.348357	0.457975	Q99PT1	Rho GDP-dissociation inhibitor 1	Arhgdia
0.137833	0.403841	0.39379	O35623	BET1 homolog	Bet1
0.137737	0.368857	0.433142	Q60714	Long-chain fatty acid transport protein 1	Slc27a1
0.136467	0.222517	0.652636	Q9Z2Z6	Mitochondrial carnitine/acylcarnitine carrier protein	Slc25a20
0.136365	0.380564	0.419572	Q9D2R6;E9Q6W2	Cytochrome c oxidase assembly protein 3 homolog, mitochondrial	Coa3
0.136244	0.36142	0.441988	Q6P549	Phosphatidylinositol 3,4,5-trisphosphate 5-phosphatase 2	Inppl1
0.135893	0.217607	0.662327	Q6P5E4;G3UYG7;G3UZC1;G3UZU8;G3UY73;E9Q4X2	UDP-glucose:glycoprotein glucosyltransferase 1	Uggt1
0.135489	0.361229	0.442217	Q3V009;Q3V009-2	Transmembrane emp24 domain-containing protein 1	Tmed1
0.134544	0.442071	0.354508	E9Q405;Q9JMH9-5;Q9JMH9-7;Q9JMH9-2;Q9JMH9-1;K3W4L0;B2RRE2;Q9JMH9;Q9JMH9-6;E9QAX2;Q9JMH9-4;E9QA74	Unconventional myosin-XVIIIa	Myo18a
0.13449	0.312069	0.50575	Q9R0X4;Q32MW3	Acyl-coenzyme A thioesterase 9, mitochondrial;Acyl-coenzyme A thioesterase 10, mitochondrial	Acot9;Acot10
0.13427	0.223989	0.649774	P56480	ATP synthase subunit beta, mitochondrial	Atp5b
0.133827	0.791489	0.101555	Q8K1H1	Tudor domain-containing protein 7	Tdrd7
0.133747	0.597368	0.223758	Q9JKN1	Zinc transporter 7	Slc30a7
0.133593	0.39778	0.400358	Q78HU3	Multivesicular body subunit 12A	Mvb12a
0.132954	0.822009	0.0851233	Q91VM5;Q9WV02;Q9WV02-2;A2AFI3;A2AFI4;Q9DAE2	RNA binding motif protein, X-linked-like-1;RNA-binding motif protein, X chromosome;RNA-binding motif protein, X chromosome, N-terminally processed	Rbmxl1;Rbmx
0.132906	0.154545	0.810946	Q80UM7	Mannosyl-oligosaccharide glucosidase	Mogs
0.132748	0.309728	0.509019	Q99N17;G3UW78;Q3V1F1		Cyp4f16;Cyp4f17;Gm9705
0.132705	0.47573	0.322639	Q8C147;Q8C147-2	Dedicator of cytokinesis protein 8	Dock8
0.132132	0.186951	0.728271	Q9D051	Pyruvate dehydrogenase E1 component subunit beta, mitochondrial	Pdhb
0.131552	0.451836	0.345019	Q3TDD9;Q3TDD9-2	Protein phosphatase 1 regulatory subunit 21	Ppp1r21
0.131347	0.32998	0.481512	Q9CZL5	Pterin-4-alpha-carbinolamine dehydratase 2	Pcbd2
0.130759	0.317421	0.498364	Q9R1K9;B1AUQ7	Centrin-2	Cetn2
0.129882	0.350067	0.455849	Q8R180	ERO1-like protein alpha	Ero1l
0.129879	0.265364	0.576157	Q8BMD6;Q8BMD6-2;D6RHS9	Transmembrane protein 260	Tmem260
0.129597	0.360098	0.443579	Q9ERD8;E9PYG5;F2Z401;F2Z489;A6PW97	Gamma-parvin	Parvg
0.12933	0.120224	0.920008	P50518;Q9D593	V-type proton ATPase subunit E 1	Atp6v1e1
0.129243	0.265534	0.57588	P35279	Ras-related protein Rab-6A	Rab6a
0.12858	0.388428	0.41069	P09411;P09041	Phosphoglycerate kinase 1	Pgk1
0.128438	0.535559	0.271192	F6V6T4;Q9R0Q3;Q8BPI2	Transmembrane emp24 domain-containing protein 2	Tmed2
0.128356	0.191488	0.717857	P19783;M0QWX7;D6RG40	Cytochrome c oxidase subunit 4 isoform 1, mitochondrial	Cox4i1
0.127295	0.58348	0.233974	Q5SQX6;F6QD74	Cytoplasmic FMR1-interacting protein 2	Cyfip2
0.126302	0.471698	0.326336	Q9CPQ8;F2Z452;J3QNM7	ATP synthase subunit g, mitochondrial	Atp5l
0.125759	0.611845	0.213359	Q3UU43		Chpf2
0.125555	0.493124	0.307044	P62852	40S ribosomal protein S25	Rps25
0.125414	0.313864	0.503259	Q62086	Serum paraoxonase/arylesterase 2	Pon2
0.124956	0.601008	0.22112	O70161-3;O70161;F8WHW6;O70161-2;F7C0X9;F6SMP3;P70181-2;P70181	Phosphatidylinositol 4-phosphate 5-kinase type-1 gamma	Pip5k1c
0.121958	0.248825	0.604107	P32020;P32020-2;A2APS4	Non-specific lipid-transfer protein	Scp2
0.121158	0.261677	0.582235	Q8CHT0	Delta-1-pyrroline-5-carboxylate dehydrogenase, mitochondrial	Aldh4a1
0.119212	0.591057	0.228371	Q91VC9	Growth hormone-inducible transmembrane protein	Ghitm
0.119189	0.408755	0.388537	Q9D6K5	Synaptojanin-2-binding protein	Synj2bp
0.11909	0.416172	0.380727	Q9Z2G9;Q9Z2G9-2	Oxidoreductase HTATIP2	Htatip2
0.118543	0.542355	0.265716	Q64737;D6RCG1;Q64737-2	Trifunctional purine biosynthetic protein adenosine-3;Phosphoribosylamine--glycine ligase;Phosphoribosylformylglycinamidine cyclo-ligase;Phosphoribosylglycinamide formyltransferase	Gart
0.118424	0.678657	0.168349	Q80X41-2;Q80X41-5;Q80X41-3;Q80X41	Serine/threonine-protein kinase VRK1	Vrk1
0.117464	0.193218	0.713952	P50516;P50516-2;D3Z1B9;D3YWH3;D3YZ23	V-type proton ATPase catalytic subunit A	Atp6v1a
0.115971	0.559076	0.25253	Q8CHK3;D3YU33;F6UP63	Lysophospholipid acyltransferase 7	Mboat7
0.115921	0.509535	0.292826	P32883-2;P32883	GTPase KRas;GTPase KRas, N-terminally processed	Kras
0.11556	0.464442	0.333069	Q8BVU5;A2AH27;A2AH28;A2AH29	ADP-ribose pyrophosphatase, mitochondrial	Nudt9
0.115049	0.493555	0.306665	G3X8Y8;Q9QUN7	Toll-like receptor;Toll-like receptor 2	Tlr2
0.114739	0.742187	0.129487	P60335	Poly(rC)-binding protein 1	Pcbp1
0.114219	0.423198	0.373456	Q4VBD2	Transmembrane anterior posterior transformation protein 1	Tapt1
0.113686	0.308678	0.510494	Q9CZ13	Cytochrome b-c1 complex subunit 1, mitochondrial	Uqcrc1
0.113341	0.417458	0.379388	O70496;E9PYL4;F7BK14	H(+)/Cl(-) exchange transporter 7	Clcn7
0.113005	0.411496	0.385635	Q99LR1;D6RFU2;D6RI21;F7BHM8	Monoacylglycerol lipase ABHD12	Abhd12
0.112725	0.102664	0.98858	P58742	Aladin	Aaas
0.112448	0.202401	0.693787	Q91VE0	Long-chain fatty acid transport protein 4	Slc27a4
0.112377	0.502247	0.299083	Q923L7		Ear6
0.112359	0.531299	0.274661	E9QA46;Q9QXY9;D3Z6X3;D3Z6X4	Peroxisomal biogenesis factor 3	Pex3
0.111856	0.327461	0.48484	O08599;O08599-2	Syntaxin-binding protein 1	Stxbp1
0.111778	0.655001	0.183758	P21279;P21278;P30677	Guanine nucleotide-binding protein G(q) subunit alpha	Gnaq
0.111295	0.467452	0.330263	P14211	Calreticulin	Calr
0.11093	0.25521	0.593102	Q4PJX1;Q4PJX1-3;Q4PJX1-2	Protein odr-4 homolog	Odr4
0.110645	0.639697	0.194026	A2A5V3;A2A5V2;P55194;A2A5V4;A2A5V1	SH3 domain-binding protein 1	Sh3bp1
0.110433	0.274974	0.560709	P70704;F6WYQ5;Q8BR88;Q3U9N5;E9Q4J5;F6Q8P7;P98200	Probable phospholipid-transporting ATPase IA	Atp8a1
0.11042	0.411077	0.386077	P62270;F6YVP7;G3UZW2;F5H8M6	40S ribosomal protein S18	Rps18;Gm10260;Rps18-ps3
0.109981	0.111459	0.952884	Q9JJL8	Serine--tRNA ligase, mitochondrial	Sars2
0.108436	0.582481	0.234718	Q9R0P5	Destrin	Dstn
0.108407	0.38331	0.41645	Q9DC16;F6SLP4;F6Z6A5	Endoplasmic reticulum-Golgi intermediate compartment protein 1	Ergic1
0.108343	0.66209	0.179083	G3UWH9;Q8R1U1;Q7TSQ9;G3UX78;G3UZ15;G3UWY4;G3UYW8;G3XA67;G3UWX2	Conserved oligomeric Golgi complex subunit 4	Cog4
0.108182	0.593137	0.226845	P62331	ADP-ribosylation factor 6	Arf6
0.108107	0.587068	0.231311	Q8BG67;Q8BG67-2;Q8BWC5;Q6ZQ18-2;Q6ZQ18	Protein EFR3 homolog A	Efr3a
0.10757	0.33791	0.471199	Q80XM9-2;Q80XM9;Q80XM9-3;Q80XM9-4;D3YYH5;D3Z2D5	PQ-loop repeat-containing protein 1	Pqlc1
0.107439	0.456106	0.340934	Q8BFP9	[Pyruvate dehydrogenase [lipoamide]] kinase isozyme 1, mitochondrial	Pdk1
0.106199	0.448135	0.348591	Q9CQF9;F7CIP8;D3Z275	Prenylcysteine oxidase	Pcyox1
0.105216	0.700552	0.15456	H3BK73;Q8R1J9;Q8R1J9-2;P0C7W3	Torsin-2A;Prosalusin;Salusin-beta	Tor2a
0.104951	0.534263	0.272245	Q91XC9	Peroxisomal membrane protein PEX16	Pex16
0.104772	0.206473	0.685136	Q9DCX2;G3X9L6	ATP synthase subunit d, mitochondrial	Atp5h;Gm10250
0.104655	0.629287	0.201151	Q07797;E9Q5X5	Galectin-3-binding protein	Lgals3bp
0.103966	0.44119	0.355375	P51174	Long-chain specific acyl-CoA dehydrogenase, mitochondrial	Acadl
0.103483	0.36889	0.433103	O70503;O70503-2	Estradiol 17-beta-dehydrogenase 12	Hsd17b12
0.103471	0.543668	0.264666	Q9CWP6;B1AU74;Q9CWP6-2;Q9CWP6-3;Q9CWP6-4	Motile sperm domain-containing protein 2	Mospd2
0.103205	0.397643	0.400507	Q9D6J6;Q9D6J6-2;M0QWP9;D6RGN4	NADH dehydrogenase [ubiquinone] flavoprotein 2, mitochondrial	Ndufv2
0.103138	0.47771	0.320836	Q9D125	28S ribosomal protein S25, mitochondrial	Mrps25
0.103046	0.655737	0.183271	Q9CYF5	Williams-Beuren syndrome chromosomal region 16 protein homolog	Wbscr16
0.102477	0.558995	0.252592	E9Q1G8;O55131;E9Q9F5;P28661-5;P28661-4;Q9DA97;P28661-3;P28661-2;P28661	Septin-7	39326
0.102413	0.50582	0.296004	P61028	Ras-related protein Rab-8B	Rab8b
0.102175	0.406182	0.391279	Q3U3R4-2;Q3U3R4;Q3U3R4-3;D6RDS1;Q3U3R4-4;F6RND1	Lipase maturation factor 1	Lmf1
0.101879	0.66729	0.175685	G5E8V9;E9Q3G5;A2RSX9;E9QAY5		Arfip1
0.10153	0.640276	0.193633	Q9D771	Transmembrane protein 206	Tmem206
0.101479	0.441579	0.354992	Q05D44	Eukaryotic translation initiation factor 5B	Eif5b
0.101443	0.49975	0.301247	P35290	Ras-related protein Rab-24	Rab24
0.101173	0.547338	0.261744	Q8VEA8;D3YZQ6;Q8VEA8-2;D3Z4X4	Ras-related protein Rab-7b	Rab7b;5430435G22Rik
0.100536	0.562951	0.24953	P47962;D3YYV8	60S ribosomal protein L5	Rpl5
0.100414	0.663289	0.178297	Q8BM72;Q8BM72-2;D3Z0Y0	Heat shock 70 kDa protein 13	Hspa13
0.0991446	0.708943	0.149389	D3Z2J3;Q99PU8-2;Q99PU8;Q99PU8-3;D3YXL7;D3Z1G8	Putative ATP-dependent RNA helicase DHX30	Dhx30
0.0989855	0.717082	0.144431	Q8JZM0	Dimethyladenosine transferase 1, mitochondrial	Tfb1m
0.0984664	0.548322	0.260964	Q8C7K6	Prenylcysteine oxidase-like	Pcyox1l
0.0979011	0.602629	0.21995	Q9CRA5	Golgi phosphoprotein 3	Golph3
0.0978769	0.591087	0.228349	Q8K5B2;D3Z6A4;D3Z1G3	Multiple coagulation factor deficiency protein 2 homolog	Mcfd2
0.0977498	0.542709	0.265433	Q78IK4;B1AV14	Apolipoprotein O-like	Apool
0.0976815	0.644105	0.191043	Q9CXR1	Dehydrogenase/reductase SDR family member 7	Dhrs7
0.0976766	0.348362	0.45797	Q8BHN3;Q8BHN3-2;Q8BHN3-3	Neutral alpha-glucosidase AB	Ganab
0.0970245	0.353186	0.451997	B9EJ86;G3X9N6;Q9ER64;G5E833	Oxysterol-binding protein	Osbpl8
0.0969056	0.56024	0.251626	P70452;D6RJ29	Syntaxin-4	Stx4
0.0960847	0.775707	0.110302	Q8BJS4-2;Q8BJS4;Q8BJS4-3;E0CY39	SUN domain-containing protein 2	Sun2
0.0956017	0.315898	0.500454	Q3V3R1	Monofunctional C1-tetrahydrofolate synthase, mitochondrial	Mthfd1l
0.0948665	0.215827	0.665894	P48410;A2ALN0	ATP-binding cassette sub-family D member 1	Abcd1
0.0946835	0.575339	0.240076	Q8R4U7	Leucine zipper protein 1	Luzp1
0.0945048	0.611984	0.21326	Q8K2C9	Very-long-chain (3R)-3-hydroxyacyl-[acyl-carrier protein] dehydratase 3	ptplad1
0.0938562	0.360527	0.443062	Q6ZQI3;D3Z1M3	Malectin	Mlec
0.0935322	0.227847	0.642357	Q9Z0F8;E9PXU2;Q9Z0F8-2;J3QNB3;J3QMF2	Disintegrin and metalloproteinase domain-containing protein 17	Adam17
0.0934021	0.508921	0.29335	Q9D1N9;Q9D1N9-2	39S ribosomal protein L21, mitochondrial	Mrpl21
0.0933951	0.792055	0.101245	Q8VIK2	Mpv17-like protein 2	Mpv17l2
0.0921673	0.68531	0.164113	Q60864	Stress-induced-phosphoprotein 1	Stip1
0.0919282	0.507836	0.294276	Q99LB2	Dehydrogenase/reductase SDR family member 4	Dhrs4
0.0918942	0.481154	0.317716	Q60931;J3QPE8;J3QMG3	Voltage-dependent anion-selective channel protein 3	Vdac3;Vdac3-ps1
0.0915415	0.386197	0.413191	Q91YQ1;E9QLQ7;M0QW55	Ras-related protein Rab-7L1	Rab7l1
0.0911372	0.270704	0.567506	Q8C7X2-2;Q8C7X2;Q8C7X2-3	ER membrane protein complex subunit 1	Emc1
0.090917	0.677485	0.169101	Q9CQP0;Q8R0E2	39S ribosomal protein L33, mitochondrial	Mrpl33
0.0908367	0.475559	0.322795	H3BJY1;H3BKF4;H3BIZ8;B0QZP8;O55101;H3BJ78	Synaptogyrin-2	Syngr2;Gm20708
0.0907587	0.717675	0.144072	P28650;P28650-2;J3QN31	Adenylosuccinate synthetase isozyme 1	Adssl1
0.090718	0.574551	0.240671	Q922Q9-2;Q922Q9;D3YWG2;G8JL55	Chitinase domain-containing protein 1	Chid1
0.090544	0.396109	0.402186	P57746	V-type proton ATPase subunit D	Atp6v1d
0.0903185	0.76884	0.114164	Q3TEA8-2;Q3TEA8;Q3TEA8-3;A2AM65;A2AM69;A2AM70;A2AM63;A2AM62	Heterochromatin protein 1-binding protein 3	Hp1bp3
0.0899194	0.354617	0.45024	Q8BP92;D6RHL9	Reticulocalbin-2	Rcn2
0.0894848	0.769593	0.113739	Q9D1Z3	Protein FAM173B	Fam173b
0.0892704	0.793098	0.100673	H3BJG4;E9Q512;Q8BVJ9		Trip11
0.0882373	0.308366	0.510933	P84096	Rho-related GTP-binding protein RhoG	Rhog
0.0881665	0.408479	0.38883	Q9CRA4;D3Z458	Methylsterol monooxygenase 1	Msmo1;Sc4mol
0.0879228	0.618103	0.208939	O88845;O88845-2;O88845-3	A-kinase anchor protein 10, mitochondrial	Akap10
0.087279	0.578336	0.23782	Q9CR26;F6W5Q8	Vacuolar protein sorting-associated protein VTA1 homolog	Vta1
0.0869598	0.514645	0.288492	O35963;P97950	Ras-related protein Rab-33B	Rab33b
0.0867548	0.696651	0.156985	D3Z7C8;O35855;O88374;D3Z3D7	Branched-chain-amino-acid aminotransferase;Branched-chain-amino-acid aminotransferase, mitochondrial	Bcat2
0.085759	0.609848	0.214778	Q9ERN0	Secretory carrier-associated membrane protein 2	Scamp2
0.0844169	0.882657	0.0542079	Q9QZE5;Q7TNQ1	Coatomer subunit gamma-1	Copg1
0.0842689	0.237713	0.623948	Q9DCN2-2;Q9DCN2;F2Z456;F2Z3V0	NADH-cytochrome b5 reductase 3;NADH-cytochrome b5 reductase 3 membrane-bound form;NADH-cytochrome b5 reductase 3 soluble form	Cyb5r3
0.0841663	0.684529	0.164608	Q9WVL6;Q6P1H4	Exostosin-like 3	Extl3
0.0835391	0.450713	0.3461	Q8BVA2;D6RIQ5;F6ZS99	Transmembrane protein 222	Tmem222
0.0830904	0.51048	0.292022	D3Z4B0;Q3UIX4;E9Q6E5;B7ZNC5;Q8BV04		Srsf11
0.0823744	0.408503	0.388805	Q8BGH2	Sorting and assembly machinery component 50 homolog	Samm50
0.082188	0.459071	0.33812	E9Q7G1;D3YZZ5		Tmed7
0.081425	0.589545	0.229483	Q9DCD0	6-phosphogluconate dehydrogenase, decarboxylating	Pgd
0.0803319	0.715841	0.145183	B1AT92;Q60631;Q60631-2;B1AT95	Growth factor receptor-bound protein 2	Grb2
0.0802091	0.734159	0.13421	Q91YZ5;P55098	Peroxisome biogenesis factor 2	Pex2
0.0802052	0.713859	0.146388	Q3T9X3;P39054;P39054-2;F8WIV5;G3UZZ3	Dynamin-2	Dnm2
0.080018	0.74114	0.1301	Q9D0Q7;F6QAU7	39S ribosomal protein L45, mitochondrial	Mrpl45
0.0797221	0.706413	0.150942	Q8VDS8-3;Q8VDS8;D3YY98;Q8VDS8-2	Syntaxin-18	Stx18
0.0795719	0.554368	0.256202	Q78IS1	Transmembrane emp24 domain-containing protein 3	Tmed3
0.0776731	0.746584	0.126922	A2AUR7;Q9D031;Q01730;B1AYQ0;E0CXH9;E0CXG5	Ras suppressor protein 1	Rsu1
0.077651	0.73023	0.13654	P0C6B7	Immunoglobulin superfamily member 6	Igsf6
0.0775066	0.41343	0.383598	Q7JCZ3;P00158	Cytochrome b	mt-Cytb;Mt-Cyb
0.0770014	0.687096	0.162982	P63321	Ras-related protein Ral-A	Rala
0.0767098	0.494918	0.305467	Q60597;Q60597-3;Q60597-2;Q60597-4;E9Q7L0;Q5SVY0;Q5SVY1	2-oxoglutarate dehydrogenase, mitochondrial	Ogdh
0.0766446	0.643651	0.19135	Q80Y14	Glutaredoxin-related protein 5, mitochondrial	Glrx5
0.075872	0.811443	0.0907422	Q7TPV4	Myb-binding protein 1A	Mybbp1a
0.0754801	0.683997	0.164946	Q64324;F8WGM5	Syntaxin-binding protein 2	Stxbp2
0.07452	0.696951	0.156798	Q8C6I2;Q8C6I2-3;Q8C6I2-2	Succinate dehydrogenase assembly factor 2, mitochondrial	Sdhaf2
0.0742492	0.718397	0.143635	Q9DAV9	Trimeric intracellular cation channel type B	Tmem38b
0.0739347	0.697333	0.15656	Q3UQN2;F6RG68;Q3UQN2-3;J3QPQ1;Q3UQN2-2	FCH domain only protein 2	Fcho2
0.0737757	0.4826	0.316413	A2AVJ7;Q99PL5;Q99PL5-4;Q99PL5-3;Q99PL5-2;Q99PL5-6;Q99PL5-7;Q99PL5-5;Q99PL5-8;Q99PL5-10;Q99PL5-9;Q99PL5-11;Q99PL5-12	Ribosome-binding protein 1	Rrbp1
0.0733831	0.714654	0.145904	Q6XPS7		Tha1
0.0730633	0.794897	0.0996894	Q9R1C7;Q9R1C7-2;A2AQW6	Pre-mRNA-processing factor 40 homolog A	Prpf40a
0.0723436	0.611392	0.21368	Q8VCS3	Glycosaminoglycan xylosylkinase	Fam20b
0.0723321	0.681715	0.166397	Q8VCF1;Q8VCF1-3;Q8VCF1-2	Soluble calcium-activated nucleotidase 1	Cant1
0.0720491	0.767634	0.114846	P59279;Q3TEG7	Ras-related protein Rab-2B	Rab2b
0.0719881	0.629168	0.201233	Q8K0Z7	Translational activator of cytochrome c oxidase 1	Taco1
0.0718141	0.607984	0.216108	Q9CR68	Cytochrome b-c1 complex subunit Rieske, mitochondrial;Cytochrome b-c1 complex subunit 11	Uqcrfs1
0.0716102	0.726341	0.138859	O35988	Syndecan-4	Sdc4
0.0715149	0.700264	0.154738	Q8BYC6;Q3V3K3;F6RXB5;Q6ZQ29-2;Q6ZQ29	Serine/threonine-protein kinase TAO3	Taok3
0.0711494	0.424842	0.371773	Q921Q3-2;Q921Q3	Chitobiosyldiphosphodolichol beta-mannosyltransferase	Alg1
0.0703893	0.739165	0.131258	Q9JKF1	Ras GTPase-activating-like protein IQGAP1	Iqgap1
0.0701661	0.713694	0.146488	Q8R123;Q8R123-2;E0CZ66;F8WGX4	FAD synthase;Molybdenum cofactor biosynthesis protein-like region;FAD synthase region	Flad1
0.0701074	0.792522	0.100989	Q569Z5;Q569Z5-2;F8WHR6	Probable ATP-dependent RNA helicase DDX46	Ddx46
0.0697869	0.320716	0.493879	Q3TVP5;Q3TVP5-2	Protein FAM105A	Fam105a
0.0694855	0.549521	0.260016	Q9D0G0	28S ribosomal protein S30, mitochondrial	Mrps30
0.0685727	0.67701	0.169405	Q8K595-2;Q8K595	Mucolipin-2	Mcoln2
0.0683599	0.741172	0.130081	D3YZ54;Q9QXE0;E9PWM4	2-hydroxyacyl-CoA lyase 1	Hacl1
0.0676516	0.441268	0.355297	Q9CQ10	Charged multivesicular body protein 3	Chmp3
0.0676234	0.585396	0.232551	Q06185;Q8BTB6	ATP synthase subunit e, mitochondrial	Atp5i;Atp5k
0.0672217	0.60892	0.21544	Q8BHS6	Armadillo repeat-containing X-linked protein 3	Armcx3
0.0668764	0.871993	0.059487	Q8BUK6;F6W1A2	Protein Hook homolog 3	Hook3
0.0663992	0.683232	0.165432	Q3UV70;A2AJP9;A8Y5Q0;A2AJQ0	[Pyruvate dehydrogenase [acetyl-transferring]]-phosphatase 1, mitochondrial	Pdp1
0.0659401	0.641069	0.193096	E9Q7T4;Q6PHS6;E9QNG6	Sorting nexin-13	Snx13
0.0654417	0.755391	0.121828	Q8BYW1-2;Q8BYW1-3;Q8BYW1	Rho GTPase-activating protein 25	Arhgap25
0.0652673	0.657394	0.182174	P09103;E9Q8G8	Protein disulfide-isomerase	P4hb
0.0652311	0.617505	0.209359	Q9D0K1;D6RH41	Peroxisomal membrane protein PEX13	Pex13
0.0652076	0.736397	0.132888	Q8VDT9	39S ribosomal protein L50, mitochondrial	Mrpl50
0.0649506	0.349205	0.456919	E9Q7N5;Q8R2Q4-2;Q8R2Q4;Q8R2Q4-3;Q8C1C2;E0CY79;E0CXH2	Ribosome-releasing factor 2, mitochondrial	Gfm2
0.0647136	0.580366	0.236298	Q8BWG9	Calcium release-activated calcium channel protein 1	Orai1
0.0647013	0.756637	0.121113	Q7JCZ1;P00405	Cytochrome c oxidase subunit 2	mt-Co2;Mtco2
0.0645218	0.807527	0.0928428	Q9CZB0;F8WGB3;D3Z1A8	Succinate dehydrogenase cytochrome b560 subunit, mitochondrial	Sdhc
0.064403	0.863505	0.0637352	Q3TPX4;E9PZ92	Exocyst complex component 5	Exoc5
0.0638021	0.118551	0.926096	Q7TN29-2;Q7TN29	Stromal membrane-associated protein 2	Smap2
0.063667	0.512409	0.290383	Q8VDL4-3;Q8VDL4;Q8VDL4-2	ADP-dependent glucokinase	Adpgk
0.0633328	0.640078	0.193767	Q99J23;A2A5D6	GH3 domain-containing protein	Ghdc
0.0628983	0.769044	0.114049	Q9WVK4	EH domain-containing protein 1	Ehd1
0.0628423	0.675743	0.170218	D3Z6Q9	Bridging integrator 2	Bin2
0.0626366	0.694577	0.158279	Q8BGT0;D3Z4W7;D3Z790	Osteopetrosis-associated transmembrane protein 1	Ostm1
0.062255	0.661439	0.17951	E9PWG6		Ncapg
0.0621313	0.770921	0.11299	O35316;D3YWZ5;E9PXG1;P31649;P31651;G5E8Z4;O55192;Q8VCS9	Sodium- and chloride-dependent taurine transporter	Slc6a6
0.0613442	0.683942	0.164981	O35887;G3UWR0;G3UWV3;G3UY49	Calumenin	Calu
0.0611317	0.708369	0.149741	P41241;D3YVQ8;D6RGA0;P41242-3;D3Z4T5;P41242;P41242-2	Tyrosine-protein kinase CSK	Csk
0.0610864	0.440805	0.355753	Q60932-2;Q60932;F2Z471	Voltage-dependent anion-selective channel protein 1	Vdac1
0.0610687	0.651256	0.186249	O08528;E9Q5B5;E9Q9M6	Hexokinase-2	Hk2
0.0607076	0.637511	0.195512	P55302;F6WMD1	Alpha-2-macroglobulin receptor-associated protein	Lrpap1
0.0605004	0.894446	0.0484458	A2AFJ1;Q60973;A2AFI9;F6ZLC6;F6U539	Histone-binding protein RBBP7	Rbbp7
0.0603565	0.424532	0.372089	Q80TL7-2;B9EKJ3;Q80TL7	Protein MON2 homolog	Mon2
0.0599458	0.602823	0.21981	Q9Z2W0	Aspartyl aminopeptidase	Dnpep
0.0595028	0.915846	0.0381777	F6QL70;P47915;D3Z1N9;F6YH22;F6VZG1	60S ribosomal protein L29	Gm17669;Rpl29;Gm10709;Gm5218
0.0593901	0.850438	0.0703574	Q8C6U2;Q8C259	PQ-loop repeat-containing protein 3	Pqlc3
0.0592285	0.461399	0.335923	Q8R2Y8	Peptidyl-tRNA hydrolase 2, mitochondrial	Ptrh2
0.0590691	0.6425	0.192127	Q8C6B0;H3BJI7;Q76I24;Q5I0W6;Q76I26;G3X9G9		Mettl7a1
0.0590198	0.901351	0.045106	Q9CWX4;F6W6X9	RNA pseudouridylate synthase domain-containing protein 4	Rpusd4
0.0585021	0.683459	0.165288	Q8VCW8	Acyl-CoA synthetase family member 2, mitochondrial	Acsf2
0.0584444	0.65443	0.184137	Q61335	B-cell receptor-associated protein 31	Bcap31
0.0582306	0.8937	0.0488084	P14733	Lamin-B1	Lmnb1
0.0567169	0.697108	0.1567	Q61578	NADPH:adrenodoxin oxidoreductase, mitochondrial	Fdxr
0.0564755	0.575471	0.239977	Q8C2Q8;Q91VR2;A2AKU9;A2AKV2;A2AKV3;A2AKV1;A2AKV0	ATP synthase subunit gamma;ATP synthase subunit gamma, mitochondrial	Atp5c1
0.0561702	0.698261	0.155982	Q99K23	Ufm1-specific protease 2	Ufsp2
0.0560641	0.69345	0.158985	E9QPM1;Q8VE91-3;Q8VE91;Q8VE91-2	Protein FAM134B	Fam134b
0.0556803	0.621138	0.206812	Q9Z1G3	V-type proton ATPase subunit C 1	Atp6v1c1
0.0554971	0.771109	0.112884	Q04899;Q8K0D0-2;Q04735-2;Q04735;Q8K0D0	Cyclin-dependent kinase 18	Cdk18
0.0543235	0.551381	0.258548	P51881;Q3V132	ADP/ATP translocase 2	Slc25a5
0.05421	0.815431	0.0886129	Q8VC04;A2A4M9;A2A4N0	Transmembrane protein 106A	Tmem106a
0.054149	0.762107	0.117984	P32233;F7BQ65	Developmentally-regulated GTP-binding protein 1	Drg1
0.0539956	0.512357	0.290427	Q8BJ48;D3Z6C9	N-acetylglucosamine-1-phosphodiester alpha-N-acetylglucosaminidase	Nagpa
0.0538064	0.786512	0.104295	Q61187;D3Z0S9;D3Z2V5	Tumor susceptibility gene 101 protein	Tsg101
0.0536268	0.830629	0.080593	Q80V53;A2AQV2	Carbohydrate sulfotransferase 14	Chst14
0.0535946	0.915152	0.0385068	P45376;D3YVJ7	Aldose reductase	Akr1b1;Akr1b3
0.0535255	0.730508	0.136375	Q8VE95	UPF0598 protein C8orf82 homolog
0.0533418	0.579294	0.237101	B1ATS5;Q64518;B1ATS4;Q64518-2;Q64518-3;E9Q559	Sarcoplasmic/endoplasmic reticulum calcium ATPase 3	Atp2a3
0.0529778	0.771161	0.112855	Q9CWD8;F7D3P0	Iron-sulfur protein NUBPL	Nubpl
0.0512775	0.663254	0.17832	Q9CXT8;D3Z1T9	Mitochondrial-processing peptidase subunit beta	Pmpcb
0.0509105	0.808894	0.0921083	Q3U2A8;F6YJY2;F7A8L1	Valine--tRNA ligase, mitochondrial	Vars2
0.0502715	0.675328	0.170485	Q8C1E7;D3Z0U3	Transmembrane protein 120A	Tmem120a
0.0500543	0.725036	0.13964	O70572;D6RGM4	Sphingomyelin phosphodiesterase 2	Smpd2
0.0495414	0.800574	0.0965986	Q80XL6;D3YTQ5;F6U473	Acyl-CoA dehydrogenase family member 11	Acad11
0.0488757	0.677564	0.16905	Q9D1H8	39S ribosomal protein L53, mitochondrial	Mrpl53
0.0487699	0.599683	0.222078	P37040;Q05DV1;E9Q997;E9PVT9;F6R7H8	NADPH--cytochrome P450 reductase	Por
0.0486394	0.860756	0.0651201	Q8R5L1;O35658	Complement component 1 Q subcomponent-binding protein, mitochondrial	C1qbp
0.0479557	0.873211	0.0588806	P53986	Monocarboxylate transporter 1	Slc16a1
0.0479348	0.85077	0.0701876	P49722	Proteasome subunit alpha type-2	Psma2
0.0478816	0.894206	0.0485622	P61924	Coatomer subunit zeta-1	Copz1
0.0473895	0.719387	0.143037	E0CXB1;Q9QUM9	Proteasome subunit alpha type-6	Psma6
0.046491	0.768834	0.114167	Q8C708	Transmembrane protein C16orf54 homolog
0.0463583	0.766652	0.115402	Q9JIS8;F8WIJ0;F6TQE2	Solute carrier family 12 member 4	Slc12a4
0.0457905	0.843392	0.0739706	O89016	ATP-binding cassette sub-family D member 4	Abcd4
0.0457471	0.676608	0.169663	Q6NWW9	Fibronectin type III domain-containing protein 3B	Fndc3b
0.0456094	0.623293	0.205308	Q9CZN8	Glutamyl-tRNA(Gln) amidotransferase subunit A, mitochondrial	Qrsl1
0.0453564	0.811276	0.0908315	D3Z4T4;Q8BTY8-2;Q8BTY8;Q8BTY8-4;Q8BTY8-3	Sec1 family domain-containing protein 2	Scfd2
0.0453353	0.740971	0.130199	Q9CZX9	ER membrane protein complex subunit 4	Emc4
0.0453117	0.66149	0.179476	Q3UMB9	WASH complex subunit 7	Kiaa1033
0.0448227	0.797448	0.0982975	Q566J8;E9QLB8	Uncharacterized aarF domain-containing protein kinase 4	Adck4
0.044713	0.909925	0.0409945	Q6PAR5-5;Q6PAR5-2;Q6PAR5;Q6PAR5-4;Q6PAR5-6;F7ADT6;F7ADQ2;F7ADS7;F6X819;F6UFP6;E9Q0D1;Q6PAR5-3	GTPase-activating protein and VPS9 domain-containing protein 1	Gapvd1
0.0446459	0.624388	0.204545	Q8K2B3	Succinate dehydrogenase [ubiquinone] flavoprotein subunit, mitochondrial	Sdha
0.0443941	0.752163	0.123688	Q9DAS9	Guanine nucleotide-binding protein G(I)/G(S)/G(O) subunit gamma-12	Gng12
0.0439492	0.724728	0.139825	Q9CQU3	Protein RER1	Rer1
0.0438984	0.662512	0.178806	Q9EQ80;D3Z0G0;E9PWJ6	NIF3-like protein 1	Nif3l1
0.0438341	0.750217	0.124813	Q9JIK9	28S ribosomal protein S34, mitochondrial	Mrps34
0.0436616	0.863352	0.0638121	Q64735-2;Q64735	Complement component receptor 1-like protein	Cr1l
0.0431214	0.813724	0.0895231	Q9WTR1	Transient receptor potential cation channel subfamily V member 2	Trpv2
0.0427789	0.418511	0.378293	Q9DB05;P28663	Alpha-soluble NSF attachment protein	Napa
0.0422356	0.717542	0.144153	P38060;D3YVU9;Q3TPS7;Q8JZS7	Hydroxymethylglutaryl-CoA lyase, mitochondrial	Hmgcl
0.0421309	0.832646	0.0795395	Q8C1B7-3;Q8C1B7-2;Q8C1B7	Septin-11	40787
0.0418693	0.645846	0.189871	Q01853	Transitional endoplasmic reticulum ATPase	Vcp
0.0417583	0.823059	0.084569	Q8BHZ0	Protein FAM49A	Fam49a
0.0417254	0.817596	0.0874612	Q99N92	39S ribosomal protein L27, mitochondrial	Mrpl27
0.0415807	0.808679	0.0922239	Q9CXD6;Q9CXD6-3;Q9CXD6-2	Mitochondrial calcium uniporter regulator 1	Mcur1
0.0415594	0.810043	0.0914919	Q8BVF7-2;Q8BVF7	Gamma-secretase subunit APH-1A	Aph1a
0.0412358	0.883989	0.0535529	Q8C052	Microtubule-associated protein 1S;MAP1S heavy chain;MAP1S light chain	Map1s
0.0411074	0.77678	0.109702	Q505D7	Optic atrophy 3 protein homolog	Opa3
0.0409537	0.771137	0.112869	Q3U9G9	Lamin-B receptor	Lbr
0.0405118	0.800836	0.0964564	Q8BVA5;Q8BVA5-2;Q8BVA5-3;Q8BVA5-4	UPF0554 protein C2orf43 homolog
0.0403287	0.743053	0.12898	Q69ZN7	Myoferlin	Myof
0.0402187	0.913963	0.0390714	Q61029;Q61029-2;Q61029-4;Q61033-2	Lamina-associated polypeptide 2, isoforms beta/delta/epsilon/gamma	Tmpo
0.040191	0.853821	0.0686333	Q6A028	Switch-associated protein 70	Swap70
0.0401416	0.78516	0.105042	Q9CPR5;Q9CPR5-2;F8WHN1	39S ribosomal protein L15, mitochondrial	Mrpl15
0.039471	0.717407	0.144234	Q8BRF7;Q8BRF7-3;Q8BRF7-2	Sec1 family domain-containing protein 1	Scfd1
0.0387102	0.803546	0.0949894	P70428;A2AIG3;E9Q1M5;A2AIG6	Exostosin-2	Ext2
0.0383453	0.823905	0.0841231	Q7JCY6;P03911	NADH-ubiquinone oxidoreductase chain 4	mt-Nd4;Mtnd4
0.0383107	0.789379	0.102714	P57716	Nicastrin	Ncstn
0.0383071	0.831572	0.0801	Q9JHF9	Lymphocyte antigen 96	Ly96
0.038268	0.811481	0.0907216	Q8BY89-2;Q8BY89	Choline transporter-like protein 2	Slc44a2
0.0382332	0.773599	0.111484	Q9ERI6	Retinol dehydrogenase 14	Rdh14
0.0379224	0.780668	0.107534	Q8CI78;F6QWS3	Required for meiotic nuclear division protein 1 homolog	Rmnd1
0.0374293	0.810165	0.0914263	Q9D6K9;Q9D6K9-2;H3BJ49;H3BJH5;H3BJQ0;H3BLB3	Ceramide synthase 5	Cers5
0.0371957	0.81682	0.0878736	O09061	Proteasome subunit beta type-1	Psmb1
0.0370621	0.712297	0.147339	Q6PB93;Q6PB93-2	Polypeptide N-acetylgalactosaminyltransferase 2;Polypeptide N-acetylgalactosaminyltransferase 2 soluble form	Galnt2
0.0359937	0.906208	0.0427722	Q9D7X3;B1AQF4;Q3V2Y9;H3BKD1;H3BKL8	Dual specificity protein phosphatase 3	Dusp3
0.0357185	0.728903	0.13733	Q91YY4;H3BLF0	ATP synthase mitochondrial F1 complex assembly factor 2	Atpaf2
0.0354042	0.818279	0.0870986	Q64261;J3QPN4	Cyclin-dependent kinase 6	Cdk6
0.035225	0.866981	0.0619906	A2AJ15;A2AJ14	Endoplasmic reticulum mannosyl-oligosaccharide 1,2-alpha-mannosidase	Man1b1
0.035012	0.952487	0.021141	Q78RX3	Small integral membrane protein 12	Smim12
0.0343098	0.946665	0.0238036	O08784;H3BL37;H3BIX0;Q05CS0;H3BK88	Treacle protein	Tcof1
0.0339807	0.654317	0.184212	Q2HXL6	ER degradation-enhancing alpha-mannosidase-like protein 3	Edem3
0.0335627	0.882875	0.0541009	Q9D8U8	Sorting nexin-5	Snx5
0.0335405	0.840792	0.0753115	P15535-2;P15535;B1AXY5	Beta-1,4-galactosyltransferase 1;Lactose synthase A protein;N-acetyllactosamine synthase;Beta-N-acetylglucosaminylglycopeptide beta-1,4-galactosyltransferase;Beta-N-acetylglucosaminyl-glycolipid beta-1,4-galactosyltransferase;Processed beta-1,4-galactosyltransferase 1	B4galt1
0.0333548	0.918139	0.0370916	G3X9V0;P97372;E0CZ90	Proteasome activator complex subunit 2	Psme2
0.0329681	0.901284	0.0451385	Q8BPE4	Transmembrane protein 177	Tmem177
0.0327205	0.793	0.100727	Q9Z2A7;F6UUI9;F6V8W6	Diacylglycerol O-acyltransferase 1	Dgat1
0.0326845	0.731433	0.135825	Q03265;D6RJ16	ATP synthase subunit alpha, mitochondrial	Atp5a1
0.0322553	0.885322	0.0528989	P85094	Isochorismatase domain-containing protein 2A, mitochondrial	Isoc2a
0.032091	0.842349	0.0745077	P34884	Macrophage migration inhibitory factor	Mif
0.031383	0.860183	0.0654089	Q9JIP4;B1PL19	Pannexin-1	Panx1
0.0307633	0.871378	0.0597934	Q9R1C6;F2Z490	Diacylglycerol kinase epsilon	Dgke
0.03064	0.850366	0.0703941	Q09200	Beta-1,4 N-acetylgalactosaminyltransferase 1	B4galnt1
0.0305113	0.801642	0.0960193	Q9CZ57;Q9CZ57-2	5-methylcytosine rRNA methyltransferase NSUN4	Nsun4
0.0302427	0.739675	0.130959	Q9D136	2-oxoglutarate and iron-dependent oxygenase domain-containing protein 3	Ogfod3
0.0300662	0.822215	0.0850146	Q501J2	Protein FAM173A	Fam173a
0.0298816	0.923591	0.0345201	Q9D898;A3KGQ6	Actin-related protein 2/3 complex subunit 5-like protein	Arpc5l
0.0297295	0.751134	0.124282	Q8BHC4;B0QZX9	Dephospho-CoA kinase domain-containing protein	Dcakd
0.0294361	0.816394	0.0881003	Q8BMD8	Calcium-binding mitochondrial carrier protein SCaMC-1	Slc25a24
0.0294263	0.866147	0.0624082	Q8K3K7;A2AI22	1-acyl-sn-glycerol-3-phosphate acyltransferase beta	Agpat2
0.0292973	0.936951	0.028283	Q8CIB6	Transmembrane protein 230	Tmem230
0.0289953	0.796999	0.0985421	Q61190;Q8VHM7;F6XX07;E9Q083	Interleukin-10 receptor subunit beta	Il10rb
0.0287697	0.859609	0.0656992	A2AJQ3-2;A2AJQ3;A2AJQ2;D6RI72;A2AJQ1	Probable C-mannosyltransferase DPY19L4	Dpy19l4
0.0286516	0.806449	0.0934229	D3Z5I1;Q3UPF5;Q3UPF5-2;G3X9X5	Zinc finger CCCH-type antiviral protein 1	Zc3hav1
0.0285292	0.898339	0.0465597	Q9D835;Q9CR48;D3Z6B7;D3YZH9	DNA damage-regulated autophagy modulator protein 2	Dram2
0.0277967	0.749118	0.12545	E9Q179;Q8C5Q4;D3YUN1;D3YV30	G-rich sequence factor 1	Grsf1
0.027167	0.876589	0.0572039	Q9D7N6	39S ribosomal protein L30, mitochondrial	Mrpl30
0.0267932	0.818621	0.0869171	Q99KE1;Q8BMF3	NAD-dependent malic enzyme, mitochondrial	Me2
0.0260652	0.866855	0.0620535	A2AMH5;A2AMH3;Q6X893;Q6X893-2;A2AMH4	Choline transporter-like protein 1	Slc44a1
0.0260603	0.890706	0.0502658	Q99JH8;D3YU99;D3YUA0;Q9CQM2	ER lumen protein retaining receptor 1;ER lumen protein retaining receptor	Kdelr1
0.0259737	0.863444	0.0637659	Q9CQN7;F7CXS7	39S ribosomal protein L41, mitochondrial	Mrpl41;Gm6434
0.0246379	0.871629	0.0596682	P10833;P62071	Ras-related protein R-Ras	Rras
0.0245861	0.909241	0.041321	Q9JII6;B1AXW3	Alcohol dehydrogenase [NADP(+)]	Akr1a1
0.0245672	0.804695	0.0943688	Q9DC61;A2AIW9	Mitochondrial-processing peptidase subunit alpha	Pmpca
0.0242387	0.898142	0.0466548	Q61599;D3YWL7	Rho GDP-dissociation inhibitor 2	Arhgdib
0.023634	0.760756	0.118755	Q9CQQ7	ATP synthase subunit b, mitochondrial	Atp5f1
0.0234543	0.880964	0.0550419	Q8BJ03-2;Q8BJ03	Cytochrome c oxidase assembly protein COX15 homolog	Cox15
0.023248	0.918539	0.0369025	O55106;F8WH41;F6Z700	Striatin	Strn
0.0232312	0.898918	0.0462801	Q8C163;E9PZS5	Nuclease EXOG, mitochondrial	Exog
0.0229669	0.858669	0.0661743	Q80UG5-2;A2A6U3;Q80UG5-3;Q80UG5;A2A6U5;A8Y5D3	Septin-9	40057
0.0229382	0.854694	0.0681895	P46460;G3UX86;G3UX98	Vesicle-fusing ATPase	Nsf
0.0228502	0.916659	0.0377923	F6X5P5;Q6PE15-2;Q6PE15	Mycophenolic acid acyl-glucuronide esterase, mitochondrial	Abhd10
0.0217643	0.842226	0.0745714	Q14CH7	Alanine--tRNA ligase, mitochondrial	Aars2
0.021739	0.877407	0.0567987	Q9CR27;G3UWG7	WASH complex subunit CCDC53	Ccdc53
0.0216868	0.883853	0.0536198	Q99J21;Q99J21-2;E0CZ07	Mucolipin-1	Mcoln1
0.0216622	0.861324	0.0648336	Q8BVE3	V-type proton ATPase subunit H	Atp6v1h
0.0205482	0.955988	0.0195477	Q5XJY5	Coatomer subunit delta	Arcn1
0.0202826	0.842925	0.074211	Q99LY9;B1ARW4	NADH dehydrogenase [ubiquinone] iron-sulfur protein 5;NADH dehydrogenase [ubiquinone] iron-sulfur protein 5, N-terminally processed	Ndufs5
0.0199371	0.820368	0.0859911	Q9CQ06	39S ribosomal protein L24, mitochondrial	Mrpl24
0.0195704	0.904953	0.043374	P97450;E9QAD6	ATP synthase-coupling factor 6, mitochondrial	Atp5j
0.019547	0.730799	0.136202	E9Q2B2;Q60974-2;Q60974;Q5RIM6;E9Q8K6;F6TWR1;F6SFD2;Q5RIN0;Q3UV08;F7C134;E9Q9Y2;Q8CHB6	Nuclear receptor corepressor 1	Ncor1
0.0194208	0.95052	0.0220388	Q61285	ATP-binding cassette sub-family D member 2	Abcd2
0.0191292	0.870349	0.0603063	Q921V5	Alpha-1,6-mannosyl-glycoprotein 2-beta-N-acetylglucosaminyltransferase	Mgat2
0.0190025	0.965	0.0154726	E9Q6R7		Utrn
0.018859	0.879529	0.0557499	O88441	Metaxin-2	Mtx2
0.0187416	0.910747	0.0406022	Q99P65;D6RI95;D3YWS9	Equilibrative nucleoside transporter 3	Slc29a3
0.0184511	0.872801	0.0590849	Q9D6J5;Q3V406;F6VCY0;E9Q9J5	NADH dehydrogenase [ubiquinone] 1 beta subcomplex subunit 8, mitochondrial	Ndufb8
0.0183555	0.873312	0.0588304	Q9JHF5;F6XRE6;F6ZFB8		Tcirg1
0.0182862	0.860419	0.0652901	Q3TDN2;Q3TDN2-2;D3Z2H4;D3YUP4;D3Z4G9;D6RE51	FAS-associated factor 2	Faf2
0.0181647	0.946108	0.0240592	Q812F8;F7BME0	Alpha-1,3-mannosyl-glycoprotein 4-beta-N-acetylglucosaminyltransferase B	Mgat4b
0.0181433	0.952354	0.0212015	P70268;P70268-2;D6RH37	Serine/threonine-protein kinase N1	Pkn1
0.0175579	0.968244	0.0140154	Q9JJR8;D3Z6W5;D3YU78;Q9CR23	Transmembrane protein 9B	Tmem9b
0.0161197	0.877025	0.0569879	Q02819;H3BK79;D3Z7D7;D3Z1N1	Nucleobindin-1	Nucb1
0.0157055	0.926221	0.0332854	Q9D023	Mitochondrial pyruvate carrier 2	Mpc2
0.0154519	0.830997	0.0804005	Q9D1E8;F8WGD9	1-acyl-sn-glycerol-3-phosphate acyltransferase epsilon	Agpat5
0.014949	0.901943	0.0448211	P63101;D3YXN6;D3YXF4;D3YW45	14-3-3 protein zeta/delta	Ywhaz
0.0144771	0.929137	0.0319205	Q5I012-3;Q5I012;J3QNE8;Q5I012-4;Q5I012-2;Q5I012-5;Q5I012-6	Putative sodium-coupled neutral amino acid transporter 10	Slc38a10
0.0144087	0.876561	0.0572176	Q8C2E7;Q8C2E7-2	WASH complex subunit strumpellin	Kiaa0196
0.0142084	0.871037	0.0599635	Q9R099;D3YZH8;F8WI46	Transducin beta-like protein 2	Tbl2
0.01392	0.909016	0.0414285	Q61543;F8WHM5;F6RSH1;E9PWD8	Golgi apparatus protein 1	Glg1
0.0138801	0.92861	0.0321665	Q923K4;E9PWV7;D6RDC6;Q923K4-2	tRNA modification GTPase GTPBP3, mitochondrial	Gtpbp3
0.0131146	0.963246	0.0162626	Q61235	Beta-2-syntrophin	Sntb2
0.0127673	0.890612	0.0503113	Q9Z2I0	LETM1 and EF-hand domain-containing protein 1, mitochondrial	Letm1
0.0125992	0.939988	0.0268779	Q08857	Platelet glycoprotein 4	Cd36
0.0118257	0.952117	0.0213096	Q9CWG8;Q9CWG8-2	NADH dehydrogenase [ubiquinone] complex I, assembly factor 7	Ndufaf7
0.0114638	0.907088	0.0423505	Q9CRB9;Q9D9P1;D3Z0L4;F6QFL0	Coiled-coil-helix-coiled-coil-helix domain-containing protein 3, mitochondrial	Chchd3
0.0113674	0.920614	0.0359225	Q8BFR5;D3YVN7;Q8BFR5-2	Elongation factor Tu, mitochondrial;Elongation factor Tu	Tufm;Gm9755
0.0111682	0.930782	0.031152	Q8CIV2;Q8CIV2-2;F6RN19	Membralin	Tmem259
0.0104796	0.940172	0.0267929	P62835	Ras-related protein Rap-1A	Rap1a
0.0102888	0.888409	0.0513871	P24369	Peptidyl-prolyl cis-trans isomerase B	Ppib
0.00991742	0.974122	0.0113867	Q8BH26	Transmembrane protein 251	Tmem251
0.00976487	0.900853	0.0453463	Q9D8M3	Heme transporter HRG1	Slc48a1
0.00973961	0.949776	0.0223789	Q99JI6	Ras-related protein Rap-1b	Rap1b
0.00972451	0.931175	0.0309685	Q9CPU4	Microsomal glutathione S-transferase 3	Mgst3
0.00905135	0.96241	0.0166399	Q9WUH1	Transmembrane protein 115	Tmem115
0.00848391	0.941798	0.0260423	Q9D9I4;B0R081;B0R080	TBC1 domain family member 20	Tbc1d20
0.00837251	0.965463	0.0152644	Q810S1;F6SD17;D6RIL8	Coiled-coil domain-containing protein 109B	Ccdc109b
0.00759843	0.962627	0.0165421	Q8JZU0	Nucleoside diphosphate-linked moiety X motif 13	Nudt13
0.00750537	0.979775	0.00887363	Q9JIZ9;Q5F284	Phospholipid scramblase 3	Plscr3
0.00703569	0.97766	0.00981201	Q9JJ06	Glycoprotein-N-acetylgalactosamine 3-beta-galactosyltransferase 1	C1galt1
0.00665681	0.970944	0.0128057	Q8R1V4;Q5SVW9	Transmembrane emp24 domain-containing protein 4	Tmed4
0.00652614	0.965658	0.0151767	P52875;D3YV67	Transmembrane protein 165	Tmem165
0.00642049	0.984029	0.00699226	Q9JKF4-2;Q3U3M9;Q9JKF4;Q9JKF4-3	C-type lectin domain family 6 member A	Clec4n;Clec6a
0.00635428	0.969579	0.0134169	P58158	Galactosylgalactosylxylosylprotein 3-beta-glucuronosyltransferase 3	B3gat3
0.00616898	0.980549	0.0085305	Q80U93	Nuclear pore complex protein Nup214	Nup214
0.00580569	0.97231	0.0121952	Q3UXG7;Q91ZW2;A2AMC3;E9PZ15;E9Q686	GDP-fucose protein O-fucosyltransferase 1	Pofut1
0.00573951	0.971662	0.0124846	Q9D6Z0	Alpha-ketoglutarate-dependent dioxygenase alkB homolog 7	Alkbh7
0.00462509	0.964293	0.0157909	Q9DB77	Cytochrome b-c1 complex subunit 2, mitochondrial	Uqcrc2
0.00444551	0.994212	0.00252098	Q61753;F6ZSB7	D-3-phosphoglycerate dehydrogenase	Phgdh
0.00357227	0.984439	0.00681098	O89086;Q8BG13	Putative RNA-binding protein 3	Rbm3
0.00287294	0.98703	0.00566969	Q8BU14	Translocation protein SEC62	Sec62
0.00270975	0.983666	0.0071522	D3YZN4;Q3ULF4;D3Z1Z1;D3YXB7;F6W695;D3Z342;G3UX97;F6VTG4	Paraplegin	Spg7
0.00214359	0.980271	0.00865383	Q8BKZ9;A2AWH8;A2AWH7	Pyruvate dehydrogenase protein X component, mitochondrial	Pdhx
0.00155409	0.993459	0.00285001	Q91YX5;E9QL80;D3YVK0	Acyl-CoA:lysophosphatidylglycerol acyltransferase 1	Lpgat1
0.00107322	0.997963	0.000885559	Q9D8T7;Q9D8T7-2;F8WHU8	SRA stem-loop-interacting RNA-binding protein, mitochondrial	Slirp
0.000906468	0.994255	0.0025022	P51175	Protoporphyrinogen oxidase	Ppox
8.14604e-05	0.999501	0.000216829	Q9DC23	DnaJ homolog subfamily C member 10	Dnajc10
-0.000178811	0.999112	0.000385842	B1AQZ0;Q8CHH9;Q8CHH9-2;B7ZC46;B1AQY9;E0CYM4	Septin-8	39692
-0.000181562	0.998829	0.000508999	Q6P3A8;Q6P3A8-2	2-oxoisovalerate dehydrogenase subunit beta, mitochondrial	Bckdhb
-0.0001945	0.999174	0.000358739	Q8CD26;F7BUQ6	Solute carrier family 35 member E1	Slc35e1
-0.000453098	0.99838	0.000704015	O08600	Endonuclease G, mitochondrial	Endog
-0.001236	0.989288	0.0046772	Q9D6Y7-2;Q9D6Y7;Q9D6Y7-4;Q9D6Y7-3	Mitochondrial peptide methionine sulfoxide reductase	Msra
-0.00160183	0.99583	0.00181468	Q3U481;D6RJ45	Major facilitator superfamily domain-containing protein 12	Mfsd12
-0.00183141	0.994192	0.00252992	Q9DCU6	39S ribosomal protein L4, mitochondrial	Mrpl4
-0.0018407	0.996462	0.00153938	Q8BH78;Q8BHF5;Q99P72-1		Rtn4
-0.0021438	0.989341	0.00465415	P62880;E9QKR0;D3YZX3;D3Z1M1;D3Z1T4;E9PWM7	Guanine nucleotide-binding protein G(I)/G(S)/G(T) subunit beta-2	Gnb2
-0.00261744	0.99305	0.00302872	P25119	Tumor necrosis factor receptor superfamily member 1B	Tnfrsf1b
-0.0032215	0.975448	0.0107961	Q922Q4	Pyrroline-5-carboxylate reductase 2	Pycr2
-0.00345041	0.975153	0.0109274	Q9CRY7	Glycerophosphodiester phosphodiesterase domain-containing protein 1	Gdpd1
-0.00352795	0.981842	0.00795826	Q9CYV5;Q8C8G3	Transmembrane protein 135	Tmem135
-0.00357979	0.986771	0.00578349	Q61333;D3Z4L9	Tumor necrosis factor alpha-induced protein 2	Tnfaip2
-0.00366604	0.976985	0.0101121	Q9CPY7-2;Q9CPY7	Cytosol aminopeptidase	Lap3
-0.00368745	0.975663	0.0107001	Q6A0D4;D3Z731	Raftlin	Rftn1
-0.00370873	0.971703	0.0124666	Q9QYA2;G3UY77	Mitochondrial import receptor subunit TOM40 homolog	Tomm40
-0.00393631	0.96706	0.0145464	Q80V26	Inositol monophosphatase 3	Impad1
-0.00442784	0.982764	0.00755077	Q8K3J1	NADH dehydrogenase [ubiquinone] iron-sulfur protein 8, mitochondrial	Ndufs8
-0.00485385	0.961811	0.01691	Q9CZW5	Mitochondrial import receptor subunit TOM70	Tomm70a
-0.00503588	0.973467	0.0116787	Q9CQV5	28S ribosomal protein S24, mitochondrial	Mrps24
-0.00513191	0.982631	0.00760947	P39098-2;P39098;A2A723	Mannosyl-oligosaccharide 1,2-alpha-mannosidase IB	Man1a2
-0.00598807	0.935427	0.0289902	P08752;B2RSH2	Guanine nucleotide-binding protein G(i) subunit alpha-2	Gnai2
-0.00625059	0.988253	0.00513193	Q60972	Histone-binding protein RBBP4	Rbbp4
-0.00629	0.975508	0.0107693	P35585;D3YZ71;Q9WVP1;Q9WVP1-2	AP-1 complex subunit mu-1	Ap1m1
-0.00634122	0.955797	0.0196343	G3X9I1;Q91VU0;G5E911;E9Q0W5;E9Q6F0;E9Q8C5	Protein FAM3C	Fam3c
-0.00653759	0.968443	0.0139258	Q921X9	Protein disulfide-isomerase A5	Pdia5
-0.007149	0.963294	0.016241	Q8BVI5;F7CJY7;F6X4N5;B7ZCB9;B7ZCB8;B7ZCB7	Syntaxin-16	Stx16
-0.00724694	0.977874	0.0097171	E9Q3H6;Q3THF9-2;G5E8J7;Q3THF9		Coq10a
-0.00744216	0.967679	0.0142686	Q5SYL3	UPF0378 protein KIAA0100	Kiaa0100
-0.00751078	0.990148	0.0043001	Q8K1M6-3;E9PUD2;Q8K1M6-5		Dnm1l
-0.00860918	0.931852	0.030653	Q5U458;E9Q8B3;A2A8D1	DnaJ homolog subfamily C member 11	Dnajc11
-0.00868895	0.960646	0.0174367	Q91VA7		Idh3b
-0.00894613	0.902376	0.0446127	O35459;F7B227	Delta(3,5)-Delta(2,4)-dienoyl-CoA isomerase, mitochondrial	Ech1
-0.00896407	0.956995	0.0190904	Q925N2	Sideroflexin-2	Sfxn2
-0.00904963	0.930195	0.0314261	P26645	Myristoylated alanine-rich C-kinase substrate	Marcks
-0.00911868	0.971663	0.0124842	Q8BH73-2;Q8BH73	Glutaminyl-peptide cyclotransferase-like protein	Qpctl
-0.00950282	0.99099	0.00393085	Q8C2K1;Q8C2K1-2	Differentially expressed in FDCP 6	Def6
-0.00970376	0.9412	0.0263182	Q91VN4;E9Q4M4	Coiled-coil-helix-coiled-coil-helix domain-containing protein 6, mitochondrial	Chchd6
-0.0100015	0.952793	0.0210012	P42208;E9Q3V6;F6WYM0;D3YYB1;D3Z3C0;D3Z1S1;F6UKN5;D3YZU7;G3UYQ0;D3YV76	Septin-2	37500
-0.0101143	0.983194	0.007361	Q99KQ4	Nicotinamide phosphoribosyltransferase	Nampt
-0.0101336	0.903357	0.0441403	Q3TFD2;Q3TFD2-2;D6RFA8;D6RE48	Lysophosphatidylcholine acyltransferase 1	Lpcat1
-0.0109387	0.912276	0.0398738	Q8BMK4	Cytoskeleton-associated protein 4	Ckap4
-0.011588	0.912942	0.039557	Q8R5J9	PRA1 family protein 3	Arl6ip5
-0.011718	0.964558	0.0156715	Q4PZA2-3;Q4PZA2-2;Q4PZA2-4;Q4PZA2	Endothelin-converting enzyme 1	Ece1
-0.0118173	0.94618	0.0240262	E9Q3L2;F6Y9T6		Pi4ka
-0.0118374	0.920894	0.0357903	Q791V5;A2AFW6;Q9D050;D6RCZ1	Mitochondrial carrier homolog 2	Mtch2
-0.0125712	0.961597	0.0170067	Q9WUA2	Phenylalanine--tRNA ligase beta subunit	Farsb
-0.0126069	0.909969	0.0409735	Q9CPP6;D3YTQ8	NADH dehydrogenase [ubiquinone] 1 alpha subcomplex subunit 5	Ndufa5
-0.0128417	0.906713	0.04253	Q8CFI5;A8Y5T6;A2AVQ7	Probable proline--tRNA ligase, mitochondrial	Pars2
-0.0134801	0.860805	0.0650953	Q9D6U8	Protein FAM162A	Fam162a
-0.0135326	0.886265	0.0524365	H3BKH2;H3BK48;H3BJS0;H3BJI6;E9PY90;E9Q3S2;H3BL19;H3BK44;Q8R311;H3BKL6;H3BJ71;H3BJS5;H3BJ35;H3BJ84	cTAGE family member 5	Ctage5
-0.0139367	0.884765	0.0531718	Q8CD10	Calcium uptake protein 2, mitochondrial	Micu2
-0.0141544	0.954444	0.0202494	Q3TP92;J3QPC9	CTD nuclear envelope phosphatase 1	Ctdnep1
-0.0143614	0.866711	0.0621254	Q8CAQ8-2
-0.0144471	0.927223	0.0328159	Q9DC51;P18872-2;A2AE32;P20612;Q3V3I2;P50149;P18872;A2AE31;D3Z2M7;F6QPU5	Guanine nucleotide-binding protein G(k) subunit alpha	Gnai3
-0.0145372	0.941025	0.0263986	Q6GV12	3-ketodihydrosphingosine reductase	Kdsr
-0.0154932	0.9207	0.0358817	Q9CQW0	ER membrane protein complex subunit 6	Emc6
-0.0158733	0.916088	0.038063	Q8C7V8-2;Q8C7V8	Coiled-coil domain-containing protein 134	Ccdc134
-0.0163481	0.94975	0.0223908	P68037;D3YZS3	Ubiquitin-conjugating enzyme E2 L3	Ube2l3
-0.0163639	0.926012	0.0333832	Q99JT1;Q8BW84;Q3TLZ6	Glutamyl-tRNA(Gln) amidotransferase subunit B, mitochondrial	Pet112
-0.0168011	0.921473	0.0355174	Q60902-3;Q60902-4;Q60902-2;Q60902	Epidermal growth factor receptor substrate 15-like 1	Eps15l1
-0.0175579	0.905399	0.0431602	P57759;F8WJI4;F8WIM7;D6RG87	Endoplasmic reticulum resident protein 29	Erp29
-0.0178901	0.911114	0.0404273	Q9ER88;G3X9M0;Q9ER88-2;G3UWZ6;G3UWM7;G3UWJ4;G3UZC0;G3UWR5;G3UYM6;G3UYP3	28S ribosomal protein S29, mitochondrial	Dap3
-0.017898	0.847241	0.0719929	Q9DAU1;Q9DAU1-2;B0V2V1	Protein canopy homolog 3	Cnpy3
-0.0180228	0.820955	0.0856809	Q9D0M3-2;Q9D0M3	Cytochrome c1, heme protein, mitochondrial	Cyc1
-0.0185138	0.930675	0.0312018	P07742	Ribonucleoside-diphosphate reductase large subunit	Rrm1
-0.0187821	0.914094	0.0390092	B9EKI3;D6RJK7	TATA element modulatory factor	Tmf1
-0.0188789	0.895544	0.0479132	Q9EQ20	Methylmalonate-semialdehyde dehydrogenase [acylating], mitochondrial	Aldh6a1
-0.0190414	0.921595	0.0354601	A2AQD6;Q922B9;Q922B9-3;A2AQD5;Q922B9-2	Sperm-specific antigen 2 homolog	Ssfa2
-0.0201865	0.888381	0.0514008	P61982	14-3-3 protein gamma;14-3-3 protein gamma, N-terminally processed	Ywhag
-0.0202016	0.935503	0.0289548	Q8BFU4;Q9CX84;B7ZCT1;B7ZCT0;F6WK59	Regulator of G-protein signaling 19	Rgs19
-0.0204894	0.841057	0.0751748	O08547;E9Q6R3;D6RES2	Vesicle-trafficking protein SEC22b	Sec22b
-0.0209073	0.930966	0.0310663	Q8QZW8		Arhgap9
-0.0214868	0.882992	0.0540434	P46638;G3UZD3;G3UZL4;D3YYB3;Q9WTL2	Ras-related protein Rab-11B	Rab11b
-0.0218769	0.896777	0.0473154	Q921M7	Protein FAM49B	Fam49b
-0.0219493	0.873027	0.0589723	Q6PCP5-3;Q6PCP5;E0CYB9;F7CTF8;Q6PCP5-2;E0CYI3;F7BC60;F7B1A4;F6VAL0	Mitochondrial fission factor	Mff
-0.0219621	0.888078	0.0515489	Q9CQE3;D3Z198	28S ribosomal protein S17, mitochondrial	Mrps17
-0.0224748	0.886161	0.0524875	Q9CZ42-3;J3QMM7;Q9CZ42;K3W4M4;Q9CZ42-2;J3QN06;J3QPU6	ATP-dependent (S)-NAD(P)H-hydrate dehydratase	Carkd
-0.022932	0.913852	0.039124	P19536;Q9D881	Cytochrome c oxidase subunit 5B, mitochondrial	Cox5b
-0.0232496	0.913937	0.0390835	Q99K51;B1AX58	Plastin-3	Pls3
-0.0236814	0.877096	0.0569527	Q8BGA9	Mitochondrial inner membrane protein OXA1L	Oxa1l
-0.0240884	0.953971	0.0204647	Q3UID0;Q6PDG5-2;Q6PDG5	SWI/SNF complex subunit SMARCC2	Smarcc2
-0.0252794	0.872239	0.0593643	Q9D3P8;D3YXU2;D3YY76;D3YV19	Plasminogen receptor (KT)	Plgrkt
-0.0257075	0.871569	0.059698	P35276;D3YWL1;D3YW33;P62823	Ras-related protein Rab-3D	Rab3d
-0.025835	0.85702	0.0670091	P08003	Protein disulfide-isomerase A4	Pdia4
-0.0258479	0.884906	0.053103	D3Z4I0;D3Z3Y1;D3YTQ6		Pigg
-0.0259154	0.772274	0.112229	Q9CQJ8	NADH dehydrogenase [ubiquinone] 1 beta subcomplex subunit 9	Ndufb9
-0.0262053	0.882787	0.0541439	E9Q6H7;Q3U3W2		Tmem181b-ps;Tmem181a
-0.0270571	0.938766	0.0274425	O88653	Ragulator complex protein LAMTOR3	Lamtor3
-0.0271712	0.854293	0.0683933	Q8BH24	Transmembrane 9 superfamily member 4	Tm9sf4
-0.0279075	0.766778	0.11533	Q91VA6;F6SQH7	Polymerase delta-interacting protein 2	Poldip2
-0.0279888	0.711532	0.147805	P22315;Q544X6	Ferrochelatase, mitochondrial;Ferrochelatase	Fech
-0.0288585	0.823669	0.0842471	Q61144;Q3U4P5;Q61144-2;D3Z0X1	Presenilin-2;Presenilin-2 NTF subunit;Presenilin-2 CTF subunit	Psen2
-0.0289429	0.83696	0.0772952	Q8VDP3-3;Q8VDP3;E9PUI4;Q8VDP3-2	Protein-methionine sulfoxide oxidase MICAL1	Mical1
-0.0290131	0.760378	0.11897	P48962	ADP/ATP translocase 1	Slc25a4
-0.029081	0.913296	0.0393882	F7AWQ5;Q3TQR0-2;Q3TQR0-3;Q3TQR0;D3YUX4;D3Z1F0;D3Z1R5;D3YZS6;D3YYE3	Post-GPI attachment to proteins factor 2	Pgap2
-0.0296962	0.78677	0.104152	Q8K2K6-3;Q8K2K6-1;Q8K2K6;Q8K2K6-2	Arf-GAP domain and FG repeat-containing protein 1	Agfg1
-0.0297696	0.785479	0.104866	Q9R1R8;Q9QYF1	Retinol dehydrogenase 11	Rdh11
-0.0309142	0.89737	0.0470285	Q8R313;Q3U9D6	Exocyst complex component 6	Exoc6
-0.0310387	0.832341	0.0796989	P62259;F6WA09;D6REF3	14-3-3 protein epsilon	Ywhae
-0.0312792	0.932793	0.0302145	Q4FZC9;Q4FZC9-2	Nesprin-3	Syne3
-0.032301	0.912875	0.0395885	P15379-2;Q3U8S1;A2APM5;P15379-3;A2APM3;P15379-6;A2APM4;P15379-11;P15379-5;E9QKM8;Q80X37;P15379-10;P15379-9;P15379-4;A2APM1;P15379-8;P15379-7;P15379;A2APM2;P15379-12;P15379-13	CD44 antigen	Cd44
-0.032983	0.814046	0.089351	Q9D3D9;D3Z7S4	ATP synthase subunit delta, mitochondrial	Atp5d
-0.0334372	0.790904	0.101876	O09111	NADH dehydrogenase [ubiquinone] 1 beta subcomplex subunit 11, mitochondrial	Ndufb11
-0.0337103	0.884583	0.0532616	Q8CBW3-2;B7ZCU4;B7ZCU3;Q8CBW3-4;Q8CBW3-3;B7ZCU0;Q8CBW3;J3QNK8;Q8CBW3-5;B7ZCU2;B7ZCU5;P62484	Abl interactor 1	Abi1
-0.0349452	0.801623	0.0960296	Q9CQ40	39S ribosomal protein L49, mitochondrial	Mrpl49
-0.0350984	0.864922	0.0630231	Q9QZC7-2;Q9QZC7-3;Q9QZC7;D3Z3L2	Pleckstrin homology domain-containing family B member 2	Plekhb2
-0.0356832	0.866344	0.0623094	O88188	Lymphocyte antigen 86	Ly86
-0.0372285	0.770902	0.113001	O88736;Q8C5N9	3-keto-steroid reductase	Hsd17b7
-0.037254	0.80187	0.095896	P53702;G3UXK7	Cytochrome c-type heme lyase	Hccs
-0.0374275	0.718029	0.143858	P16332	Methylmalonyl-CoA mutase, mitochondrial	Mut
-0.0375775	0.737593	0.132183	Q9CR62;Q5SX46;Q5SX48	Mitochondrial 2-oxoglutarate/malate carrier protein	Slc25a11
-0.0380351	0.806661	0.0933092	Q9DCT2	NADH dehydrogenase [ubiquinone] iron-sulfur protein 3, mitochondrial	Ndufs3
-0.0382998	0.866554	0.0622044	P10852	4F2 cell-surface antigen heavy chain	Slc3a2
-0.0385211	0.936121	0.0286681	Q9ES97-3;Q9ES97-4;Q9ES97-5;Q9ES97-2;Q9ES97	Reticulon-3	Rtn3
-0.0389371	0.670479	0.173615	Q9D270	Probable palmitoyltransferase ZDHHC21	Zdhhc21
-0.0394105	0.74634	0.127063	Q9D1P0;F7CXG9;G5E909	39S ribosomal protein L13, mitochondrial	Mrpl13
-0.0395637	0.827863	0.0820415	O70472	Transmembrane protein 131	Tmem131
-0.0396505	0.846022	0.0726184	P67984	60S ribosomal protein L22	Rpl22
-0.039669	0.717142	0.144395	Q9DCS3;A2A845	Trans-2-enoyl-CoA reductase, mitochondrial	Mecr
-0.0397395	0.735524	0.133403	Q9CXI0;F6X4L9	2-methoxy-6-polyprenyl-1,4-benzoquinol methylase, mitochondrial	Coq5
-0.0399008	0.94041	0.0266828	P21619;P21619-2	Lamin-B2	Lmnb2
-0.0400835	0.693108	0.159199	Q9D1B9;F6U4U1	39S ribosomal protein L28, mitochondrial	Mrpl28
-0.0405064	0.80876	0.0921803	Q3UXD9;Q99MZ7;D6RHN4;D6RIP0	Peroxisomal trans-2-enoyl-CoA reductase	Pecr
-0.0409049	0.843612	0.0738573	A2ATI9;Q99JX3;A2ATI8;A2ATI6;Q99JX3-2	Golgi reassembly-stacking protein 2	Gorasp2
-0.0416793	0.879571	0.0557293	Q9CZU4	GTPase Era, mitochondrial	Eral1
-0.0417477	0.545345	0.263328	Q9DC69	NADH dehydrogenase [ubiquinone] 1 alpha subcomplex subunit 9, mitochondrial	Ndufa9
-0.0420171	0.848219	0.0714918	P68510	14-3-3 protein eta	Ywhah
-0.0421967	0.704776	0.151949	O35598;E9PYF2;D3Z1E6	Disintegrin and metalloproteinase domain-containing protein 10	Adam10
-0.0422277	0.840551	0.0754359	Q80TM9;Q80TM9-2;Q80TM9-3;Q80TM9-6;Q80TM9-5;Q80TM9-4;E9PZT1;F6UKP3;F6PY46;F6ZL69;Q80TM9-7;F7AFP3;F6YR29	Nischarin	Nisch
-0.0425764	0.886178	0.0524789	Q8BJ71;Q8BJ71-2	Nuclear pore complex protein Nup93	Nup93
-0.0426816	0.717259	0.144324	Q8BMS1	Trifunctional enzyme subunit alpha, mitochondrial;Long-chain enoyl-CoA hydratase;Long chain 3-hydroxyacyl-CoA dehydrogenase	Hadha
-0.0427478	0.855984	0.0675342	Q6NVG1	Lysophospholipid acyltransferase LPCAT4	Lpcat4
-0.0428623	0.765599	0.115999	Q9CQC7	NADH dehydrogenase [ubiquinone] 1 beta subcomplex subunit 4	Ndufb4
-0.0436703	0.913319	0.0393774	Q9WTM5;D3YXQ8	RuvB-like 2	Ruvbl2
-0.0438567	0.905096	0.0433055	Q61191;B1AUX2;F6SJS2	Host cell factor 1;HCF N-terminal chain 1;HCF N-terminal chain 2;HCF N-terminal chain 3;HCF N-terminal chain 4;HCF N-terminal chain 5;HCF N-terminal chain 6;HCF C-terminal chain 1;HCF C-terminal chain 2;HCF C-terminal chain 3;HCF C-terminal chain 4;HCF C-terminal chain 5;HCF C-terminal chain 6	Hcfc1
-0.0446976	0.78189	0.106854	Q149L6;Q149L6-2;Q149L6-3	DnaJ homolog subfamily B member 14	Dnajb14
-0.0450223	0.755461	0.121788	Q3UN04	Ubiquitin carboxyl-terminal hydrolase 30	Usp30
-0.0453906	0.860902	0.0650461	Q8K3G9;D3Z340;D6RFR7;H3BJX0;H3BL43	DCC-interacting protein 13-beta	Appl2
-0.0454721	0.889399	0.0509033	P97765;A2A860	WW domain-binding protein 2	Wbp2
-0.045715	0.855272	0.0678956	Q60855;F7D1J2	Receptor-interacting serine/threonine-protein kinase 1	Ripk1
-0.0459827	0.822817	0.0846967	Q8R035;Q8R035-2;A2A6T4;D6RHR8	Peptidyl-tRNA hydrolase ICT1, mitochondrial	Ict1
-0.0465253	0.767765	0.114771	Q99LL3;D3YUY0	Carbohydrate sulfotransferase 12	Chst12
-0.0467833	0.698081	0.156094	Q8VDC0	Probable leucine--tRNA ligase, mitochondrial	Lars2
-0.0476927	0.764203	0.116791	Q99L13	3-hydroxyisobutyrate dehydrogenase, mitochondrial	Hibadh
-0.0479258	0.782506	0.106512	Q8C407;Q8C407-2	Protein YIPF4	Yipf4
-0.0483811	0.727781	0.137999	P97930;D3Z3R3;P97930-2	Thymidylate kinase	Dtymk
-0.0491032	0.781009	0.107344	Q9CQE1;B1AWZ5;G3X8S9;B1AWZ3	Protein NipSnap homolog 3B	Nipsnap3b
-0.0492697	0.864907	0.0630304	Q91WM2	Cat eye syndrome critical region protein 5 homolog	Cecr5
-0.049463	0.715119	0.145622	Q6NVE9;Q6NVE9-2	Protein phosphatase PTC7 homolog	Pptc7
-0.0498965	0.70165	0.15388	Q9CXU4;Q9WTQ8	Mitochondrial import inner membrane translocase subunit Tim23	Timm23
-0.0501878	0.741994	0.129599	Q3U422		Ndufv3
-0.0503754	0.767884	0.114704	Q9ET30	Transmembrane 9 superfamily member 3	Tm9sf3
-0.0506189	0.59418	0.226082	P97333	Neuropilin-1	Nrp1
-0.0507877	0.738987	0.131363	Q9DCA2;Q3U8Y1	28S ribosomal protein S11, mitochondrial	Mrps11
-0.0509077	0.599388	0.222292	Q91WD5;D3YXT0;F6RJ83	NADH dehydrogenase [ubiquinone] iron-sulfur protein 2, mitochondrial	Ndufs2
-0.051156	0.749075	0.125475	Q9D924;I3ITR1	Iron-sulfur cluster assembly 1 homolog, mitochondrial	Isca1;AK157302
-0.0512463	0.803986	0.0947517	Q3UHB1	5-nucleotidase domain-containing protein 3	Nt5dc3
-0.0523653	0.739745	0.130918	Q9EQP2	EH domain-containing protein 4	Ehd4
-0.0527415	0.724501	0.139961	Q80ZP8;Q3TMX5;Q9CXI5;F6USD5;F6T4L3;E0CXA8;F7C1S6	Mesencephalic astrocyte-derived neurotrophic factor	Manf
-0.0532012	0.810941	0.091011	Q8C7U7	Polypeptide N-acetylgalactosaminyltransferase 6	Galnt6
-0.0534613	0.725698	0.139244	Q9CZP5	Mitochondrial chaperone BCS1	Bcs1l
-0.0534933	0.753205	0.123087	Q9D2R8;Q8R2K5	28S ribosomal protein S33, mitochondrial	Mrps33
-0.0536205	0.602566	0.219996	Q8CGK3	Lon protease homolog, mitochondrial	Lonp1
-0.0538093	0.623626	0.205076	Q9EP89	Serine beta-lactamase-like protein LACTB, mitochondrial	Lactb
-0.0538361	0.72296	0.140885	Q69ZP3-2;Q69ZP3;Q69ZP3-3
-0.0541255	0.609386	0.215108	Q9R112;F6ZKZ3;H3BLH2	Sulfide:quinone oxidoreductase, mitochondrial	Sqrdl
-0.0545602	0.619085	0.20825	Q9D855;Q9CQB4	Cytochrome b-c1 complex subunit 7	Uqcrb
-0.0546634	0.659108	0.181044	Q8CI95;G5E8A0;Q8R2T7	Oxysterol-binding protein-related protein 11;Oxysterol-binding protein	Osbpl11
-0.0548889	0.387763	0.411433	Q8JZR0	Long-chain-fatty-acid--CoA ligase 5	Acsl5
-0.0561352	0.610068	0.214622	Q3ULJ0-2;Q3ULJ0;D3Z0L6	Glycerol-3-phosphate dehydrogenase 1-like protein	Gpd1l
-0.0561965	0.716083	0.145037	Q99LB4;D3YTL5;P24452;D3YZN3;D3YU77;D3Z014;D3Z4K5	Macrophage-capping protein	Capg
-0.0565265	0.813364	0.0897148	Q6P9Q4	FH1/FH2 domain-containing protein 1	Fhod1
-0.0565632	0.664557	0.177468	Q9CPQ1;D3Z6E1	Cytochrome c oxidase subunit 6C	Cox6c
-0.056805	0.79786	0.0980731	Q8K304-2;Q8K304	Transmembrane protein 129	Tmem129
-0.0569654	0.790363	0.102173	Q3TCT4;Q3TCT4-2	Ectonucleoside triphosphate diphosphohydrolase 7	Entpd7
-0.057501	0.816922	0.0878193	Q8CFE6	Sodium-coupled neutral amino acid transporter 2	Slc38a2
-0.0575565	0.767775	0.114766	Q9CX00	IST1 homolog	Ist1
-0.0576183	0.343011	0.464692	Q8JZN5;F6TBZ5;F6W0S5	Acyl-CoA dehydrogenase family member 9, mitochondrial	Acad9
-0.0580199	0.824437	0.0838427	Q5SUA5;Q5SYD0-2;Q5SYD0	Unconventional myosin-Ig	Myo1g
-0.0580919	0.836593	0.0774857	P30681	High mobility group protein B2	Hmgb2
-0.0583857	0.834004	0.078832	Q9EPB5;Q3U3G8;F6TMN2	Serine hydrolase-like protein	Serhl
-0.0585083	0.850085	0.0705374	Q3UHH8;D3Z6W7;Q3UHH8-2	Glucoside xylosyltransferase 1	Gxylt1
-0.0590651	0.721945	0.141496	P48771	Cytochrome c oxidase subunit 7A2, mitochondrial	Cox7a2
-0.0591514	0.483016	0.316039	Q8JZN7;H3BKJ1;H3BKL2;H3BL14	Mitochondrial Rho GTPase 2	Rhot2
-0.0593772	0.758489	0.120051	Q9CZV8-4;Q9CZV8;Q9CZV8-3;A2A536;A2A533	F-box/LRR-repeat protein 20	Fbxl20
-0.059699	0.621621	0.206474	P26443	Glutamate dehydrogenase 1, mitochondrial	Glud1
-0.0601098	0.673797	0.171471	Q8BLN5;F7BJL0	Lanosterol synthase	Lss
-0.0604334	0.527857	0.277484	Q6PDL0	Cytoplasmic dynein 1 light intermediate chain 2	Dync1li2
-0.0608091	0.73491	0.133766	E9PY39;Q99LQ7;Q9CZY3;B7ZBY7;Q9D2M8-2;Q9CZY3-2;D3YXL3;B7ZBY6;D3Z6R2;Q9D2M8;D3Z1I3	Transmembrane protein 189	Gm20431;Tmem189
-0.0610611	0.613489	0.212193	Q8BGC4	Zinc-binding alcohol dehydrogenase domain-containing protein 2	Zadh2
-0.0613525	0.806745	0.0932637	Q9QXW9	Large neutral amino acids transporter small subunit 2	Slc7a8
-0.0614398	0.689845	0.161248	Q80ZK0;E9QJS0;G5E8U8;G5E8U5;D3Z6K5	28S ribosomal protein S10, mitochondrial	Mrps10
-0.0617499	0.66946	0.174276	Q6P9J9	Anoctamin-6	Ano6
-0.0617769	0.867128	0.0619166	D3YWF6;Q7TQI3;D3Z7K0	Ubiquitin thioesterase OTUB1	Otub1
-0.0618312	0.545588	0.263135	O88587-2;O88587;D3Z227	Catechol O-methyltransferase	Comt
-0.0618351	0.580743	0.236016	Q9R1J0	Sterol-4-alpha-carboxylate 3-dehydrogenase, decarboxylating	Nsdhl
-0.0623819	0.74924	0.125379	Q8R3F5	Malonyl-CoA-acyl carrier protein transacylase, mitochondrial	Mcat
-0.062456	0.644413	0.190836	Q8VEK0;D3YVV1	Cell cycle control protein 50A	Tmem30a
-0.0629672	0.742484	0.129313	O09005;F6S3U4	Sphingolipid delta(4)-desaturase DES1	Degs1
-0.0633577	0.834762	0.0784372	Q9WUM3;D3YUG6	Coronin-1B	Coro1b
-0.0635697	0.838	0.0767561	Q3UND0-2;Q3UND0	Src kinase-associated phosphoprotein 2	Skap2
-0.0648196	0.737562	0.132202	Q9D8P4;H3BJT9;H3BIZ3;Q9D8P4-2	39S ribosomal protein L17, mitochondrial	Mrpl17
-0.0648698	0.775812	0.110243	P52480	Pyruvate kinase isozymes M1/M2	Pkm
-0.0658207	0.801719	0.0959779	Q99N91	39S ribosomal protein L34, mitochondrial	Mrpl34
-0.0659393	0.621176	0.206785	Q3UDR8;F6YIY0;D3YXM6	Protein YIPF3	Yipf3
-0.0683861	0.752034	0.123763	Q91V92;Q3V117;Q3TS02	ATP-citrate synthase	Acly
-0.0685724	0.740232	0.130632	Q9CY28;F6SMJ7;Q9CY28-2;F6XXP5	GTP-binding protein 8	Gtpbp8
-0.0688664	0.777379	0.109367	Q7TSI1	Pleckstrin homology domain-containing family M member 1	Plekhm1
-0.0689646	0.605516	0.217874	Q5SXY1;Q5SXY1-2;Q5SXY1-3	Cytospin-B	Specc1
-0.0692478	0.643075	0.191738	Q9CQN1	Heat shock protein 75 kDa, mitochondrial	Trap1
-0.0700668	0.727776	0.138002	Q9CY27;G3UWE1;Q52L67	Very-long-chain enoyl-CoA reductase	Tecr
-0.0703899	0.500577	0.300529	Q05920;G5E8R3;E9QPD7	Pyruvate carboxylase, mitochondrial;Pyruvate carboxylase	Pc;Pcx
-0.070606	0.734407	0.134063	Q8BTX9	Inactive hydroxysteroid dehydrogenase-like protein 1	Hsdl1
-0.0708019	0.417183	0.379674	Q8BIJ6;E9PWN2;E9PWN3	Isoleucine--tRNA ligase, mitochondrial	Iars2
-0.0712483	0.730317	0.136489	Q8CAQ8;Q8CAQ8-5;E9Q800;E9QAY6	Mitochondrial inner membrane protein	Immt
-0.071281	0.807205	0.0930162	Q9DCC5;P23198;D3Z1A9;D3Z313;Q7TPM0;Q9CYJ8;P83917	Chromobox protein homolog 3	Cbx3
-0.0717335	0.666686	0.176078	Q11011;F6QYF8;E9Q039;E9Q6F4;F6V7K3	Puromycin-sensitive aminopeptidase	Npepps
-0.0718436	0.610932	0.214007	Q99JY0;D3YXU1	Trifunctional enzyme subunit beta, mitochondrial;3-ketoacyl-CoA thiolase	Hadhb
-0.0724584	0.480585	0.31823	P49769;P49769-2	Presenilin-1;Presenilin-1 NTF subunit;Presenilin-1 CTF subunit;Presenilin-1 CTF12	Psen1
-0.0724885	0.652228	0.1856	Q8BH86;E9QMK9;Q8BH86-2;F7CUW7	UPF0317 protein C14orf159 homolog, mitochondrial	9030617O03Rik
-0.0729265	0.692358	0.159669	Q9D786-2;Q9D786	HAUS augmin-like complex subunit 5	Haus5
-0.0737922	0.571725	0.242813	Q5SYH2	Transmembrane protein 199	Tmem199
-0.0739379	0.696009	0.157385	Q91YM4-2;Q91YM4;E9PUT1;Q5SWP1;Q5SWP0	Protein TBRG4	Tbrg4
-0.074909	0.643501	0.191451	Q7JCZ0;P03930	ATP synthase protein 8	mt-Atp8;Mtatp8
-0.0763153	0.737578	0.132192	Q921Y4	Major facilitator superfamily domain-containing protein 5	Mfsd5
-0.076452	0.527024	0.27817	Q8BMQ8	Vacuolar fusion protein MON1 homolog B	Mon1b
-0.0769581	0.784502	0.105406	Q9Z0V8;D3Z1K5;D3Z1Z0	Mitochondrial import inner membrane translocase subunit Tim17-A	Timm17a
[truncated: 1,157 more rows]

## Sheet: IFNg qualitative changer
identified in 5/5 IFNγ-treated samples but in ≤ 1/6 untreated samples
average LFQ intensity in IFNγ treated samples	protein IDs (uniprot identifier)	Protein name	Gene names
26560000	Q62293		Tgtp
25880000	Q9QZ85	Interferon-inducible GTPase 1	Iigp1 (Irga6)
19564160	Q3UBX0;D3Z7P2;D3Z3Z2;D3YX08;D3Z0I8	Transmembrane protein 109	Tmem109
9772780	Q8CFB4	Guanylate-binding protein 5	Gbp5
8015180	Q61107	Guanylate-binding protein 3	Gbp3
7301040	P12804	Fibroleukin	Fgl2
5466180	Q8C9E8	Protein FAM26F	Fam26f
4724880	Q64345	Interferon-induced protein with tetratricopeptide repeats 3	Ifit3
4259460	P16460;J3QNG0	Argininosuccinate synthase	Ass1;Gm5424
3852760	Q9EP73	Programmed cell death 1 ligand 1	Cd274
3558540	L7N1X8;Q000W5		Gbp6;Gbp10
3283260	D3YW23;P17515	C-X-C motif chemokine 10	Cxcl10
2773920	Q3UDK1-2;Q3UDK1	TRAF-type zinc finger domain-containing protein 1	Trafd1
2343700	Q9DBU3	Serine/threonine-protein kinase RIO3	Riok3
2136120	Q6GTM0;Q64112	Interferon-induced protein with tetratricopeptide repeats 2	Ifit2
1838580	P29387	Guanine nucleotide-binding protein subunit beta-4	Gnb4
1752160	Q8CGE8	Interferon-activable protein 205-A	Ifi205a
1649760	Q99J72-3;H3BJQ3;Q99J72-4;H3BKE5;Q99J72-2;Q99J72;E9QMH1;H3BJ44;H3BJL0;Q3TI69	DNA dC->dU-editing enzyme APOBEC-3	Apobec3
1559040	Q8HWB2		H2-Q4
1548120	A6H5X4-3;A6H5X4;A6H5X4-2	PHD finger protein 11	Phf11
1471500	Q3THS6	S-adenosylmethionine synthase isoform type-2	Mat2a
1370550	Q9Z1A1;B8JJG7;B8JJG8;B8JJG6;F6QJV5		Tfg
1218898	Q3UQA2;Q9D3G2	SLAM family member 8	Slamf8
1212128	P42669	Transcriptional activator protein Pur-alpha	Pura
1189186	Q8BFY6	Peflin	Pef1
1127570	P35922-9;P35922-8;P35922-3;E9QAT0;D3Z6U8;P35922-7;E9QNF5;P35922-2;Q6AXB7;P35922;E9QAS9;E9QAS8;P35922-11;P35922-5;P35922-12;P35922-6	Fragile X mental retardation protein 1 homolog	Fmr1
1078236	Q9JL16-2;Q9JL16	Interferon-stimulated gene 20 kDa protein	Isg20
1004682	Q3U7K7;Q62191	E3 ubiquitin-protein ligase TRIM21	Trim21
932036	Q9DBC3;E0CXC2	Cap-specific mRNA (nucleoside-2-O-)-methyltransferase 1	Ftsjd2;Rnf8
882356	Q61288	Serine/threonine-protein kinase receptor R3	Acvrl1
859586	Q60837	Interleukin-12 receptor subunit beta-1	Il12rb1
838316	Q99PG2;Q99PG2-2	Opioid growth factor receptor	Ogfr
826354	Q6NZC7;G3X928	SEC23-interacting protein	Sec23ip
812966	A2AJ72;Q3TIX6		Fubp3
703034	F8VQG4		H2-T24
682692	Q8CI94	Glycogen phosphorylase, brain form	Pygb
655172	Q9D104;G5E8T3;Q9D7A6	Signal recognition particle 19 kDa protein	Srp19
640910	Q99KN2;G3UYR5	Probable cytosolic iron-sulfur protein assembly protein CIAO1	Ciao1
530398	Q99M31;Q99M31-2	Heat shock 70 kDa protein 14	Hspa14
518444	Q8R3C0;H9KV04	Mini-chromosome maintenance complex-binding protein	Mcmbp
513518	Q91YZ8;D3Z5M2;A3KFU5;A3KFU8;Q6PHQ9		Pabpc4;Gm10110
479836	H3BJX3;Q6XJV4;Q6XJV6	Cell surface glycoprotein CD200 receptor 4;Cell surface glycoprotein CD200 receptor 2	Cd200r4;Cd200r1l
477580	Q3UED7		Gm4951
477562	B4XVQ1		Phf11b
439502	Q9WTV6	Ubl carboxyl-terminal hydrolase 18	Usp18
415786	Q9JII5-2;Q9JII5;Q3UGB5;D3Z4J1	DAZ-associated protein 1	Dazap1
402226	Q922R0;B1AVU1	cAMP-dependent protein kinase catalytic subunit PRKX	Prkx
387850	P49717	DNA replication licensing factor MCM4	Mcm4
387066	D3YZG5;P70406;D3YXM5	Mitochondrial uncoupling protein 2	Ucp2
382112	Q6QX36;D6RJI6;A6XA72		B430306N03Rik
364364	Q80VI1	E3 ubiquitin-protein ligase TRIM56	Trim56
355640	Q8CFB8;Q3ULW8		Parp3
354858	Q61508;Q61508-2;F8WI14	Extracellular matrix protein 1	Ecm1
347202	Q8R2V5	Arf-GAP with dual PH domain-containing protein 2	Adap2
346876	Q7TN98-4;Q7TN98-5;Q7TN98-3;Q5SU48;Q7TN98-2;Q7TN98;Q5SU47	Cytoplasmic polyadenylation element-binding protein 4	Cpeb4
325754	Q80UM3;G3X8Y3	N-alpha-acetyltransferase 15, NatA auxiliary subunit	Naa15
324986	Q91XU3	Phosphatidylinositol 5-phosphate 4-kinase type-2 gamma	Pip4k2c
323194	D3YVM2;Q9QY73	Transmembrane protein 59	Tmem59
322840	A2AGR1;A2AGQ3;A2AGQ2;A2AGQ8;A2AGQ7;A2AGQ9;A2AGQ5;Q80U28-11;Q80U28-10;Q80U28-9;Q80U28-8;Q80U28-7;Q80U28-6;Q80U28-5;Q80U28-4;Q80U28-3;Q80U28-15;Q80U28;A2AGR0;A2AGQ6;Q80U28-14;E9QN47;A2AGQ4;Q80U28-2;Q80U28-13;A6PWP8;Q80U28-12	MAP kinase-activating death domain protein	Madd
314284	E9Q9H2;E9Q9H3;P54103	DnaJ homolog subfamily C member 2	Dnajc2
313210	P49138	MAP kinase-activated protein kinase 2	Mapkapk2
312480	Q8CJG0	Protein argonaute-2	Eif2c2
292584	Q91YR7	Pre-mRNA-processing factor 6	Prpf6
287202	Q62178;D3YWV5	Semaphorin-4A	Sema4a
285056	G3UY25;P50592	Tumor necrosis factor ligand superfamily member 10	Tnfsf10
265996	Q9QYJ3	DnaJ homolog subfamily B member 1	Dnajb1
254080	P59326;A2AWN8	YTH domain family protein 1	Ythdf1
253164	Q80WM9		Tnfrsf14
249912	D3Z061;Q8C7R4	Ubiquitin-like modifier-activating enzyme 6	Uba6
234780	Q9Z130;F6VQH5;D3YTQ3	Heterogeneous nuclear ribonucleoprotein D-like	Hnrpdl
229618	Q5ND28;B7ZC28	Scavenger receptor class F member 1	Scarf1
221388	Q8BK63-2;H7BXB1;E9Q4G7;Q8BK63;E9PWB2;E9Q2U6;E9Q3W1	Casein kinase I isoform alpha	Csnk1a1
202850	Q9D6T0;Q9D6T0-2;D3YV75	Nitric oxide synthase-interacting protein	Nosip
180818	O70469	Docking protein 2	Dok2
179026	Q8BV66	Interferon-induced protein 44	Ifi44
150062	Q8VI36-2;Q8VI36;F8VQ28	Paxillin	Pxn

## Sheet: IFNb vs IFNg
IFNβ/IFNγ LFQ intensity ratio [log2]	p-value	p-value [-log10]	Protein ID (uniprot identifier)	Protein names	Gene names
4.28267	2.77632e-05	4.55653	E9PXF7;D3Z6F0		Gm14446
2.3938	9.04144e-06	5.04376	Q9JL16-2;Q9JL16	Interferon-stimulated gene 20 kDa protein	Isg20
2.33402	5.26753e-05	4.27839	Q8CBB9;D6RJ49	Radical S-adenosyl methionine domain-containing protein 2	Rsad2
2.01119	1.01588e-05	4.99316	Q3U5Q7	UMP-CMP kinase 2, mitochondrial	Cmpk2
1.7879	0.000101789	3.9923	Q64282	Interferon-induced protein with tetratricopeptide repeats 1	Ifit1
1.69756	0.000792081	3.10123	O88627;A2AWR5;E9PXX9	Sodium/nucleoside cotransporter 2	Slc28a2
1.56001	0.00310021	2.50861	Q9CYL5;B1AWD6	Golgi-associated plant pathogenesis-related protein 1	Glipr2
1.54052	0.0292135	1.53442	Q8R007-2;Q8R007;F6W9D6	Poliovirus receptor-related protein 4	Pvrl4
1.49767	0.0280709	1.55174	P55065;A2A5K2;A2A5K4;A2A5K3	Phospholipid transfer protein	Pltp
1.48746	0.000594415	3.22591	Q6GTM0;Q64112;D3YZ80	Interferon-induced protein with tetratricopeptide repeats 2	Ifit2
1.47255	0.00187102	2.72792	E9Q5I7;Q3UAM9;Q63961;F7BZW0	Endoglin	Eng
1.44934	0.000980886	3.00838	Q64345	Interferon-induced protein with tetratricopeptide repeats 3	Ifit3
1.33502	0.00678169	2.16866	Q6QX36;D6RJI6;A6XA72		B430306N03Rik
1.27947	4.047e-06	5.39287	Q9CZS1;G3UYH1;Q62148;G3UWP3;P24549;O35945;Q9JHW9	Aldehyde dehydrogenase X, mitochondrial	Aldh1b1
1.25713	0.016704	1.77718	Q6Q899;A2AP29;Q6Q899-2;Q6Q899-3;Q6Q899-4	Probable ATP-dependent RNA helicase DDX58	Ddx58
1.23659	0.000306695	3.51329	O08573-2;B1AQR8;O08573;G3X9T7	Galectin-9	Lgals9
1.23542	0.000353857	3.45117	Q8K469;Q05BJ7		Oas1g
1.19238	0.000434582	3.36193	Q99MB1	Toll-like receptor 3	Tlr3
1.12038	0.021443	1.66872	Q8R5F7;Q8R5F7-2	Interferon-induced helicase C domain-containing protein 1	Ifih1
1.01266	0.00112416	2.94917	Q62035	Platelet-activating factor receptor	Ptafr
-0.193311	0.155292	0.808852	D3Z7P3-2;F6RDM4
0.113589	0.296419	0.528095	O35465-2;F6WP10;D3Z597
-0.0531897	0.622986	0.205522	P17047-3
-0.1496	0.421894	0.374796	P21107-2;D3Z2H9;D3Z6I8;Q8K0Z5;E9Q5J9;D3YVR0;E9Q448;B7ZNL3		Tpm3-rs7;Tpm3
0.479281	0.236772	0.62567	P25911-2
0.231603	0.38056	0.419576	P49282-2;P49282-3
0.168388	0.247951	0.605634	Q69ZP3-2;Q69ZP3;Q69ZP3-3
0.0111243	0.962859	0.0164371	Q7M6Y3-2;Q7M6Y3-3;Q7M6Y3-5;Q8BQA2;Q3TWS4;E9Q9A3;Q61548-3;E9QQ05;Q61548-2;Q61548;E9QLK9
0.0219426	0.822679	0.0847697	Q8CAQ8-2
0.230002	0.334123	0.476093	Q8CCM6-2;Q8CCM6-3;Q8CCM6
0.153283	0.597372	0.223755	Q9QXS1-3;E9QMZ5		Plec
-0.0536949	0.814978	0.0888542	A2AFY6;E9PVB5;A2AFY7;A2AGG1		Ttc17
-0.128732	0.462405	0.334978	A2AIV8		Card9
-0.213019	0.154713	0.810472	A2AJ72;Q3TIX6;F7AM43;A2AJ71;F6S444		Fubp3
-0.406683	0.129981	0.886121	A2AR26;Q3UDF0;A2AR27		Slc2a6
0.177406	0.435121	0.36139	B1AUX5;Q80Z68;B1AUY3;Q3TE27;E9PYS6;B1AUY2;E9Q4R3;F6SL55;F6YWG4;B1AUY1		Arhgap4
0.0854833	0.646879	0.189177	B2RXV4		Mfsd7b
-0.501404	0.29733	0.526761	B9EJ54;E9Q880		Nup205
0.0670356	0.231333	0.635762	B9EJ80		Pdzd8
-0.0458822	0.889437	0.0508849	D3Z285		Nfu1
-0.207082	0.422223	0.374458	D3Z286		Tmppe
-0.0897603	0.761738	0.118194	D3Z2E7;E9Q3L4		AI607873
0.00608763	0.980737	0.00844754	D3Z2R5		Sepn1
-0.0685463	0.582047	0.235042	D3Z4I0;D3Z3Y1;D3YTQ6		Pigg
-0.0572756	0.680014	0.167482	E9PV60;E9Q2M9		Wdfy4
0.0382819	0.611373	0.213694	E9PVA8;Q8BIX2		Gcn1l1
-0.140303	0.608331	0.21586	E9PVD4;E9Q394;E9Q474		Akap13
0.326553	0.754673	0.122241	E9PVX6		Mki67
-0.154252	0.233943	0.63089	E9PWG2;E9PY51		Trappc8
0.208009	0.463939	0.333539	E9PYB0		Ahnak2
-0.223007	0.116731	0.932815	E9Q137;Q3TXY2		Tex264
0.28174	0.256606	0.590733	E9Q1Z6		Gm14548
0.0501258	0.79209	0.101226	E9Q3L2;F6Y9T6		Pi4ka
-0.167511	0.369268	0.432659	E9Q411		Nbas
0.442608	0.277352	0.556968	E9Q467;E9Q236		Abcc4
-0.0173403	0.933956	0.0296738	E9Q4K7;Q9EQW7;F8VQ75		Kif13b
0.515092	0.142715	0.845531	E9Q616;G5E8K8		Ahnak
-0.395534	0.183857	0.735521	E9Q6H7;Q3U3W2		Tmem181b-ps;Tmem181a
0.335081	0.294608	0.530755	E9Q6R7		Utrn
0.106125	0.812356	0.0902537	E9Q7G0		Numa1
-0.0733056	0.360373	0.443247	E9Q7G1;D3YZZ5		Tmed7
-0.256102	0.16025	0.795202	E9Q7H5;B2RXM2;Q8BG05-2;J3QNY1		Gm8991;Gm6793;Gm9242
0.390416	0.157607	0.802425	E9Q912;E9Q6Q4		Rap1gds1
0.0911776	0.711542	0.147799	E9Q987;D3Z3L3		Trim12c
0.326133	0.205689	0.686788	E9Q9B7		Kidins220
0.344671	0.0919684	1.03636	E9QAH1		Golgb1
0.347353	0.220414	0.65676	E9QAM5;A2AS03;A2AS05		Helz2
-0.326881	0.24002	0.619752	E9QAT4;A2AIX1;F7BPW6		Sec16a
0.0499252	0.617146	0.209612	E9QKL6		Ifi204
-0.23876	0.546144	0.262693	E9QKV6;E9PWZ6;E9PZW8		Myo9b
-0.289599	0.0841528	1.07493	F6SPK0;B1AWT7		Ube2j1
-0.005997	0.960601	0.0174568	F6ST92;D3YXL0		Ccdc170
-0.262591	0.538557	0.268768	F6VRP8		Lgals3bp
-0.0446524	0.898338	0.0465602	F7ACR9;F6Q750;F6RL59		Macf1
-0.0565943	0.866757	0.0621027	F7BJB9		Morc3
0.322529	0.207411	0.683169	F7DBB3;Q3URZ6		Ahnak2
0.33191	0.0619211	1.20816	F8VQC7		Ktn1
-0.129556	0.208632	0.680619	F8VQG4;G3UWY8		H2-T24
-0.0399569	0.824126	0.0840064	G3X972		Sec24c
-0.012573	0.913216	0.0394266	G3XA21;E0CZ22;D3Z624;F6UUF6;E9PYI5		Mroh1
0.0644088	0.530074	0.275664	G3XA66;D3YVW0;G3XA75;G3UYJ5;G3UXB5		Mtx1
0.463708	0.112736	0.947938	G5E829;Q8C048;A2ALL9;Q0VF55		Atp2b1
-0.225557	0.108973	0.962681	G5E895;D3Z494		Akr1b10
0.228834	0.393505	0.405049	G5E8V9;E9Q3G5;A2RSX9;E9QAY5		Arfip1
-0.0461809	0.860148	0.0654266	H3BJG4;E9Q512;Q8BVJ9		Trip11
0.22358	0.102652	0.988633	H3BKT0;H3BLJ7;H3BJL7		Cux1
-0.188688	0.152084	0.817917	J3QPZ6		Gm21884
0.0783874	0.42236	0.374317	O88325		Naglu
0.37331	0.23517	0.628618	Q32ME1;F7AAP4;E9Q828;Q6Q477		Atp2b4
0.162367	0.270192	0.568327	Q3TBV4		Kcnk6
0.0413613	0.857263	0.0668859	Q3U1U4;F6YXU0		Itgam
0.154926	0.32151	0.492806	Q3U422		Ndufv3
0.318271	0.113259	0.945927	Q3U466;D6RE34;F6SXC2		Cln6
0.248463	0.275008	0.560654	Q3UED7		Gm4951
-0.589954	0.383389	0.41636	Q3UJB0		Sf3b2
-0.259089	0.487984	0.311594	Q3ULB1;Q921W7;P47226-2		Tes
-0.262175	0.21453	0.668513	Q3UMK4;D3YVV0;E9Q723		Ttc13
-0.530842	0.0884962	1.05308	Q3UU43		Chpf2
-0.330933	0.178318	0.748804	Q5SSJ1		Wfdc17
0.220047	0.471257	0.326742	Q5SVP0;Q5SVP2;Q8CB10;Q5SVN9		9930111J21Rik1;9930111J21Rik2
-0.678176	0.0850575	1.07029	Q62293;Q5SVP4		Tgtp
0.151168	0.266291	0.574643	Q6A099;Q6DFZ1;H3BLN1;H3BIX5;H3BLM8		Gbf1
-0.775292	0.178077	0.749391	Q6NSQ5;F6V9G0;F7DFN7;E0CY74;E9Q3M7;E0CXL1;E9PV05;E9Q422;E0CXN9;Q3KNJ6;Q8C898		Sp140
0.985404	0.0174919	1.75716	Q8R361	Rab11 family-interacting protein 5	Rab11fip5
-0.0712868	0.684001	0.164943	Q6XPS7		Tha1
0.0084189	0.960174	0.0176502	Q6ZWQ7		Spcs3
0.326604	0.493127	0.307041	Q80UI7		Clec4a1
-0.103794	0.58826	0.230431	Q80WM9;F6Y2U8		Tnfrsf14
0.975877	0.0292984	1.53316	Q9D0K1;D6RH41	Peroxisomal membrane protein PEX13	Pex13
-0.608074	0.31233	0.505386	Q8BH78;Q8BHF5;Q99P72-1		Rtn4
-0.0406505	0.86694	0.0620108	Q8BJT9		Edem2
-1.00207	0.101861	0.991993	Q8BVY0		Rsl1d1
0.960908	0.00673976	2.17136	P20065-2;P20065	Thymosin beta-4;Hematopoietic system regulatory peptide	Tmsb4x
-0.233697	0.349171	0.456962	Q8CFB8;Q3ULW8		Parp3
0.230741	0.291437	0.535456	Q8CIE4;F6Z9X8		Parp10
0.94332	0.00957683	2.01878	O88188	Lymphocyte antigen 86	Ly86
0.19119	0.242516	0.615259	Q8JZU2;F6VVY4		Slc25a1
0.941845	0.00288554	2.53977	Q9JJU8	SH3 domain-binding glutamic acid-rich-like protein	Sh3bgrl
-0.0852694	0.45414	0.34281	Q8K1X4		Nckap1l
0.93055	0.00397628	2.40052	P21855;Q3UB58;A2AIN5;Q3UZ35;Q3UNJ0	B-cell differentiation antigen CD72	Cd72
0.139508	0.497488	0.303217	Q8QZW8		Arhgap9
0.0158595	0.897453	0.0469885	Q8VHM5;A2AW41		Hnrnpr
-0.134824	0.408949	0.388331	Q91VA7		Idh3b
0.0779744	0.643508	0.191446	Q91X76		Nt5dc2
0.927459	0.00666487	2.17621	Q99KW3-4;Q99KW3;Q99KW3-1;E9QMQ3;Q99KW3-2;G5E8W1;J9JI90;Q99KW3-5	TRIO and F-actin-binding protein	Triobp
0.239671	0.426213	0.370374	Q91YZ8;D3Z5M2;A3KFU5;A3KFU8;Q6PHQ9		Pabpc4;Gm10110
0.995929	0.232196	0.634146	Q91Z40		Gbp7
0.223694	0.510252	0.292216	Q99J77		Nans
-0.117811	0.517975	0.285691	Q99LA2;E9PW12;Q9JMD0;B1AQG7;Q8CCB2;M0QWF0		Zfp207
-0.154291	0.217495	0.662551	Q99N17;G3UW78;Q3V1F1		Cyp4f16;Cyp4f17;Gm9705
-0.0487352	0.661312	0.179594	Q9CQ43;Q8VCG1		Dut
0.907685	0.0214155	1.66927	P97484;E9Q6M9	Leukocyte immunoglobulin-like receptor subfamily B member 3	Lilrb3
0.0756579	0.630742	0.200148	Q9EQY5;D3YYJ5		Fcrls
-0.194187	0.102996	0.98718	Q9JHF5;F6XRE6;F6ZFB8		Tcirg1
0.18065	0.492226	0.307835	Q9QXJ2;E9QJX9		Stat2
-0.070871	0.793569	0.100415	Q9Z1A1;B8JJG7;B8JJG8;B8JJG6;F6QJV5;B8JJG9;B8JJG3		Tfg
0.0774481	0.430854	0.36567	Q9Z1M2		Irgm2
0.137082	0.61687	0.209806	A1BN54;Q7TPR4;D3YY95	Alpha-actinin-1	Actn1
0.181112	0.432626	0.363887	A1L3P4;B0QZV3;D3Z0Q9	Sodium/hydrogen exchanger	Slc9a6
0.237368	0.0785625	1.10478	Q9CQ80;A2A4J8;A8XY17;E9PXS9;Q9CQ80-2;A2A4K0	Vacuolar protein-sorting-associated protein 25	Vps25
0.0187046	0.91744	0.0374221	A2A547;P84099	60S ribosomal protein L19	Rpl19
0.101562	0.360755	0.442788	A2A5R2;F6YCJ0	Brefeldin A-inhibited guanine nucleotide-exchange protein 2	Arfgef2
0.0616787	0.73002	0.136665	Q9DBE7;A2A5S3;A2A5R8;Q9Z108	Double-stranded RNA-binding protein Staufen homolog 1	Stau1
0.296852	0.292661	0.533635	A2A5V3;A2A5V2;P55194;A2A5V4;A2A5V1	SH3 domain-binding protein 1	Sh3bp1
0.196098	0.394577	0.403868	A2A6S1;Q3TB48	Transmembrane protein 104	Tmem104
-0.0812826	0.544793	0.263768	Q80UG5-2;A2A6U3;Q80UG5-3;Q80UG5;A2A6U5;A8Y5D3	Septin-9	40057
0.067347	0.706869	0.150661	A2A6Z2;Q6SJQ7-2;Q6SJQ7;Q6SJQ7-3;Q8VCH2	CMRF35-like molecule 1	Cd300lf
-0.163799	0.295412	0.529572	Q8CFX1;A2A7A7;A2A7A8	GDH/6PGL endoplasmic bifunctional protein;Glucose 1-dehydrogenase;6-phosphogluconolactonase	H6pd
-0.139627	0.619749	0.207784	O35454;A2A7F6;E9Q741	Chloride transport protein 6	Clcn6
0.125243	0.747846	0.126188	Q3V1T4;A6PW84;A2A7Q5;Q3V1T4-2;Q3V1T4-3;F2Z499	Prolyl 3-hydroxylase 1	Lepre1
0.202545	0.493721	0.306518	Q6SJQ5;A2A7W1;L7N207;A2A7W0	CMRF35-like molecule 3	Cd300lh;Gm11709
0.878334	0.0181816	1.74037	Q9D8C2;A7NSI0	Tetraspanin-13	Tspan13
0.475548	0.335915	0.47377	P48193-2;P48193;A2A841;A2A842;A2A839;A2A838;A2AD32;F7BUB8;F6S4K9;F7CR30	Protein 4.1	Epb41;Epb4.1
0.866775	0.00380388	2.41977	Q3U5N6;Q9D3F6;D3YZH6;Q9ES61		Ms4a4c
0.845441	0.0465516	1.33207	P37217	Early activation antigen CD69	Cd69
-0.196762	0.214604	0.668363	E9PX48;Q8R1A4-2;A2A9M5;Q8R1A4;A2A9M4;A2AW79;F6ZJ55	Dedicator of cytokinesis protein 7	Dock7
0.156368	0.527853	0.277487	O35250-2;A2AAN0;O35250;A2AAN3;A2AAN4	Exocyst complex component 7	Exoc7
-0.254995	0.358615	0.445372	A2AAN2;Q8BMA6	Signal recognition particle subunit SRP68	Srp68
0.00211975	0.991882	0.00354017	A2AAY5	SH3 and PX domain-containing protein 2B	Sh3pxd2b
0.111723	0.412535	0.384539	A2ADA5;A2ADA5-2;A2ADA5-3	tRNA pseudouridine synthase-like 1	Pusl1
-0.00152884	0.989028	0.00479161	Q9CQY5;F6WHL0;A2ADH1;Q9CQY5-2;Q9CQY5-3;F6TBV1	Magnesium transporter protein 1	Magt1
0.274303	0.342201	0.465719	A2AE89;P10649;F6WHQ7;F6Y363;D3YZ29;D3YVP6;D3YX76;A2AE91;E9QAC8;D3YVP5;Q8R5I6;Q80W21;P15626;E9PV63;J3QQ61;E9PVM7;O35660;P48774	Glutathione S-transferase Mu 1	Gstm1
0.1269	0.401243	0.396593	Q99LI2;A2AEM2	Chloride channel CLIC-like protein 1	Clcc1
-0.0154107	0.943232	0.0253816	Q9R0M8;A2AER4;A2AER3	UDP-galactose translocator	Slc35a2
0.142844	0.238907	0.621772	A2AF47;A2AF67;A2AF65	Dedicator of cytokinesis protein 11	Dock11
0.00356839	0.995657	0.00189016	A2AFJ1;Q60973;A2AFI9;F6ZLC6;F6U539	Histone-binding protein RBBP7	Rbbp7
-0.232974	0.148745	0.827559	Q64430;A2AG68;B1AQ57;Q64446	Copper-transporting ATPase 1	Atp7a
-0.0265186	0.919311	0.0365373	A2AGR1;A2AGQ3;A2AGQ2;A2AGQ8;A2AGQ7;A2AGQ9;A2AGQ5;Q80U28-11;Q80U28-10;Q80U28-9;Q80U28-8;Q80U28-7;Q80U28-6;Q80U28-5;Q80U28-4;Q80U28-3;Q80U28-15;Q80U28;A2AGR0;A2AGQ6;Q80U28-14;E9QN47;A2AGQ4;Q80U28-2;Q80U28-13;A6PWP8;Q80U28-12;A6PWP7	MAP kinase-activating death domain protein	Madd
0.105608	0.569701	0.244353	A2AGT5-3;K3W4R5;A2AGT5;A2AGT5-2	Cytoskeleton-associated protein 5	Ckap5
0.320601	0.098115	1.00826	Q5FWK3;A2AH25	Rho GTPase-activating protein 1	Arhgap1
-1.14578	0.194488	0.711106	G3UZ34;O08810;A2AH85	116 kDa U5 small nuclear ribonucleoprotein component	Eftud2
-0.193584	0.453229	0.343682	Q80UP3;A2AHJ7;A2AHK0;D3Z519;D3Z2W1;D3YWQ0	Diacylglycerol kinase zeta	Dgkz
0.0920143	0.641782	0.192613	A2AHX9;Q64373-2;Q9QWX2;Q64373-3;Q64373-4;Q64373;A2AHX8;A2AHX7	Bcl-2-like protein 1	Bcl2l1
0.00166968	0.993519	0.00282385	Q80U87;A2AI52	Ubiquitin carboxyl-terminal hydrolase 8	Usp8
0.536001	0.237159	0.62496	P25085-2;A2AIU1;Q3TBV5;P25085	Interleukin-1 receptor antagonist protein	Il1rn
0.219983	0.303693	0.517566	A2AJ15;A2AJ14	Endoplasmic reticulum mannosyl-oligosaccharide 1,2-alpha-mannosidase	Man1b1
-0.0326083	0.714083	0.146251	A2AJ88-2;A2AJ88;F6UDU9;B0R010;B0R009;B0R011	Patatin-like phospholipase domain-containing protein 7	Pnpla7
-0.244376	0.372126	0.42931	A2AJI1;A2AJI0-2;A8Y5P4;A2AJI0;F6WF36	MAP7 domain-containing protein 1	Map7d1
-0.0820005	0.719415	0.143021	Q3UV70;A2AJP9;A8Y5Q0;A2AJQ0	[Pyruvate dehydrogenase [acetyl-transferring]]-phosphatase 1, mitochondrial	Pdp1
-0.0421048	0.768659	0.114266	A2AJQ3-2;A2AJQ3;A2AJQ2;D6RI72;A2AJQ1	Probable C-mannosyltransferase DPY19L4	Dpy19l4
[truncated: 3,047 more rows]
