# Supplementary material for: IFNs Modify the Proteome of Legionella-Containing Vacuoles and Restrict Infection Via IRG1-Derived Itaconic Acid
Source: PLOS journal article supplement (doi:10.1371/journal.ppat.1005408), 2016-02-01

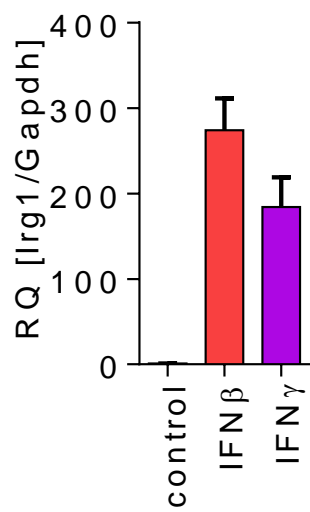

Supplement: S7 (10.1371/journal.ppat.1005408.s007) [file journal.ppat.1005408.s007]
